# Supplementary material
Source: PubMed Central journal article supplement (PMC8130633)

## **Supporting Information**

### ***In Vitro* Screening for Chemical Inhibition of the Iodide Recycling Enzyme, Iodotyrosine Deiodinase**

Jennifer H. Olker,<sup>\*,†,‡,1</sup> Joseph J. Korte,<sup>\*,†,‡,¶</sup> Jeffrey S. Denny,<sup>\*,†,‡</sup> Jonathan T. Haselman,<sup>\*,†,‡</sup> Phillip C. Hartig,<sup>\*,†,§</sup> Mary C. Cardon,<sup>\*,†,§</sup> Michael W. Hornung,<sup>\*,†,‡</sup> and Sigmund J. Degitz,<sup>\*,†,‡</sup>

<sup>\*</sup>U.S. Environmental Protection Agency, <sup>†</sup>Office of Research and Development, <sup>‡</sup>Center for Computational Toxicology and Exposure, Great Lakes Toxicology and Ecology Division, Duluth, Minnesota, 55804; <sup>§</sup>Center for Public Health and Environmental Assessment, Research Triangle Park, North Carolina 27709; <sup>¶</sup>Retired.

<sup>1</sup>To whom correspondence should be addressed at U.S. EPA, Office of Research and Development, Center for Computation Toxicology and Exposure, Great Lakes Toxicology and Ecology Division, 6201 Congdon Blvd, Duluth, MN 55804 USA. E-mail: [olker.jennifer@epa.gov](mailto:olker.jennifer@epa.gov) Tel: 218-529-5119

Number of Tables: 3

Number of Figures: 4

## Supplementary Tables

|                                                                                                                                                                                                                                                                                                                                                                                                                                                                                                                                                                                                                                                                             |    |
|-----------------------------------------------------------------------------------------------------------------------------------------------------------------------------------------------------------------------------------------------------------------------------------------------------------------------------------------------------------------------------------------------------------------------------------------------------------------------------------------------------------------------------------------------------------------------------------------------------------------------------------------------------------------------------|----|
| Supplementary Table 1. ....                                                                                                                                                                                                                                                                                                                                                                                                                                                                                                                                                                                                                                                 | 3  |
| Chemical samples that were identified as interfering with the assay and therefore were excluded from analyses.                                                                                                                                                                                                                                                                                                                                                                                                                                                                                                                                                              |    |
| Supplementary Table 2. ....                                                                                                                                                                                                                                                                                                                                                                                                                                                                                                                                                                                                                                                 | 4  |
| <u>Single-concentration screening results</u> . List of all chemicals tested in the iodotyrosine deiodinase (IYD) inhibition assay, organized by source; maximum concentration tested and median % inhibition (n = 3 replicates) produced in single-concentration screening, with indication (Y = yes, N = no) of whether chemical was tested in concentration-response (CR).                                                                                                                                                                                                                                                                                               |    |
| Supplementary Table 3. ....                                                                                                                                                                                                                                                                                                                                                                                                                                                                                                                                                                                                                                                 | 66 |
| <u>Concentration-response results</u> . All chemicals tested in concentration-response screening, including the 10 replicated test chemicals, 80 ToxCast chemicals that produced greater than 50% median inhibition in single-concentration screening, and 64 additional ToxCast chemicals that produced no or low to moderate inhibition in single-concentration screening; the 154 chemicals are organized by source, with name, CASRN, maximum concentration tested, median % inhibition at maximum concentration, and, absolute IC <sub>20</sub> , absolute IC <sub>50</sub> , and Hill slope for chemicals with Hill model as the best fit in ToxCast Pipeline (v2.0). |    |

## Supplementary Figures

- Supplementary Figure 1..... 72  
Example layouts for assay plates: [A] Single-concentration screening at a target concentration of 200  $\mu\text{M}$ . Chemical source plates were received with column 1 empty for the concentration-response curve for the model inhibitor, 3-Nitro-L-tyrosine (MNT) from the high concentration of 200  $\mu\text{M}$ . Twelve additional wells were left empty on the source plate to which dimethyl sulfoxide (DMSO) was added to 3 wells (white blocks), 0.05 M sodium hydroxide (NaOH) was added to 3 wells (medium grey blocks), and the model inhibitor MNT (red blocks) was added to the remaining 6 wells to establish the fully inhibited response level. Chemicals from the replicated test-set were repeated across multiple plates and example wells for these chemicals are indicated with an asterisk. These were randomly assigned to wells on each plate. [B] Concentration-response screening with seven concentrations in serial dilutions from maximum tested concentration. The concentration-response curve for the model inhibitor, MNT was in column 1. Row H had 3 DMSO wells (white blocks), 3 0.05 M NaOH wells (medium grey blocks), and 6 model inhibitor MNT wells (red blocks). Final MNT concentrations in column 1 were 200, 1.0, 0.16, 0.075, 0.025, 0.005, and 0.0005  $\mu\text{M}$  from highest (row A) to lowest (row G). Column 1 row H contained 0.05 M NaOH.
- Supplementary Figure 2..... 73  
Single-concentration screening results for the 10 test chemicals replicated across multiple chemical source plates (represented by different colors) to evaluate the plate-to-plate variability. Deiodinase inhibition produced by test chemicals that were randomly replicated across the chemical source plates. The following chemicals were included: Tribromsalan (CASRN: 87-10-5), Bithionol (CASRN: 97-18-7), Triclosan (CASRN: 3380-34-5), Bromoxynil (CASRN: 1689-84-5), Bisphenol A (80-05-7), Dibutyl phthalate (84-74-2), Acetochlor (34256-82-1), Genistein (446-72-0), 4-nonylphenol (104-40-5), 2,2',4,4'-Tetrahydroxybenzophenone (131-55-5), based on availability for plating on the chemical source plates and previous testing for IYD inhibition in Shimizu et al. (2013) or Renko et al. (2016).
- Supplementary Figure 3..... 74  
Concentration-response curves for inhibition of IYD by model inhibitor MNT for all single-concentration and concentration-response assay plates, with multiple plates included on each of the following four pages. Each triplicate test of a plate has different symbols and fit line, solid circle with solid line = rep 1, open triangle with dashed line = rep 2,  $\times$  with dotted line = rep 3. DMSO = dimethyl sulfoxide; NaOH = sodium hydroxide.
- Supplementary Figure 4..... 79  
Concentration-response screening data. Inhibition of iodotyrosine deiodinase (IYD) produced by all chemicals tested in concentration-response (CR) screening at seven concentrations. Hill model curve, absolute  $\text{IC}_{50}$ , and Hill slope included for the chemicals where Hill model fit in ToxCast pipeline (tcp1 v2.0); the following 154 pages include CR results for one chemical per page. DMSO = dimethyl sulfoxide; NaOH = sodium hydroxide. NA = not applicable (Hill model did not fit data and/or 50% inhibition not produced in concentration-response testing).

**Supplementary Table 1.** Chemical samples that were identified as interfering with the assay and therefore were excluded from analyses.

| Chemical                           | CASRN      | Source <sup>a</sup> | Reason Excluded                                              |
|------------------------------------|------------|---------------------|--------------------------------------------------------------|
| 3-Iodo-2-propynyl-N-butylcarbamate | 55406-53-6 | ph1v2               | Interference with Sandell-Kolthoff (SK) reaction             |
| Methylene bis(thiocyanate)         | 6317-18-6  | ph1v2               | Interference with Sandell-Kolthoff (SK) reaction             |
| Amiodarone hydrochloride           | 19774-82-4 | ph2                 | Contains free iodide or possibly being deiodinated by enzyme |
| 1H,1H,2H,2H-Perfluorooctyl iodide  | 2043-57-4  | ph2                 | Contains free iodide or possibly being deiodinated by enzyme |
| 3,5,3'-Triiodothyronine            | 6893-02-3  | ph2                 | Abnormal time course of absorbance at 420 nm <sup>b</sup>    |
| FD&C Red 3                         | 16423-68-0 | e1k                 | Contains free iodide or possibly being deiodinated by enzyme |
| Thiocyanic acid, ammonium salt     | 1762-95-4  | e1k                 | Interference with Sandell-Kolthoff (SK) reaction             |
| C.I. Acid Blue 22                  | 28631-66-5 | e1k                 | Abnormal time course of absorbance at 420 nm                 |
| 1,2-Ethanediamine dihydriodide     | 5700-49-2  | e1k                 | Contains free iodide or possibly being deiodinated by enzyme |
| Sodium iodide                      | 7681-82-5  | e1k                 | Contains free iodide or possibly being deiodinated by enzyme |
| C.I. Acid Yellow 3 disodium salt   | 8004-92-0  | e1k                 | Interference with Sandell-Kolthoff (SK) reaction             |
| Iopanoic acid                      | 96-83-3    | e1k                 | Contains free iodide or possibly being deiodinated by enzyme |

<sup>a</sup> Source. ToxCast Chemical sets: ph1v2 indicates ToxCast phase1\_v2 chemical library, ph2 indicates ToxCast phase2 chemical library, and e1k indicates ToxCast e1k chemical library obtained via Dr. Ann Richard, EPA/ORD, Research Triangle Park, NC, USA.

<sup>b</sup> Abnormal time course of absorbance at 420 nm: Chemical flagged based on absorbance at time 0 or 10 minutes outside of expected range based on DMSO and MNT (model inhibitor).

**Supplementary Table 2. Single-concentration screening results.** List of all chemicals tested in the iodotyrosine deiodinase (IYD) inhibition assay, organized by source; maximum concentration tested and median % inhibition (n = 3 replicates) produced in single-concentration screening, with indication (Y = yes, N = no) of whether chemical was tested in concentration-response (CR).

<sup>a</sup> Source. Test indicates set of chemicals selected based on previous testing for IYD inhibition and were replicated across multiple chemical source plates. ToxCast Chemical sets: ph1v2 indicates ToxCast phase 1\_v2 chemical library, ph2 indicates ToxCast phase 2 chemical library, ph3 indicates ToxCast phase 3 chemical library, and e1k indicates ToxCast e1k chemical library, all obtained via Dr. Ann Richard, EPA/ORD, Research Triangle Park, NC, USA. <sup>b</sup> Concentrations in  $\mu\text{M}$ , except where indicated as in  $\mu\text{g/ml}$  for the following compounds: adipic acid, polypropyleneglycol, laurate; clove leaf oil; C10-21 sulfonic acids phenyl esters; Grinstad Soft-N-Safe; cremophor EL; corrmint oil; peppermint oil; anise oil; polyoxyethylene monoleate; Igepal CO-890.

| DSSTox_Substance_Id | Chemical                           | CASRN       | Source <sup>a</sup> | Max conc., $\mu\text{M}$ <sup>b</sup> | % Inhibition, median | Tested in CR? | Replicated across plates? |
|---------------------|------------------------------------|-------------|---------------------|---------------------------------------|----------------------|---------------|---------------------------|
| DTXSID9021342       | Bithionol                          | 97-18-7     | test                | 200                                   | 98                   | Y             | Y                         |
| DTXSID5033836       | 4-Nonylphenol                      | 104-40-5    | test                | 200                                   | 67                   | Y             | Y                         |
| DTXSID5032498       | Triclosan                          | 3380-34-5   | test                | 200                                   | 65                   | Y             | Y                         |
| DTXSID4026181       | Tribromsalan                       | 87-10-5     | test                | 200                                   | 80                   | Y             | Y                         |
| DTXSID2021781       | Dibutyl phthalate                  | 84-74-2     | test                | 200                                   | 19                   | Y             | Y                         |
| DTXSID7020182       | Bisphenol A                        | 80-05-7     | test                | 200                                   | 6                    | Y             | Y                         |
| DTXSID5022308       | Genistein                          | 446-72-0    | test                | 200                                   | 4                    | Y             | Y                         |
| DTXSID3022162       | Bromoxynil                         | 1689-84-5   | test                | 160                                   | 1                    | Y             | Y                         |
| DTXSID8023848       | Acetochlor                         | 34256-82-1  | test                | 200                                   | 2                    | Y             | Y                         |
| DTXSID5041306       | 2,2',4,4'-Tetrahydroxybenzophenone | 131-55-5    | test                | 200                                   | 1                    | Y             | Y                         |
| DTXSID1034973       | Tralkoxydim                        | 87820-88-0  | ph1                 | 200                                   | 6                    | N             | N                         |
| DTXSID1032488       | Thiazopyr                          | 117718-60-2 | ph1                 | 200                                   | 18                   | N             | N                         |
| DTXSID0034695       | Mancozeb                           | 8018-01-7   | ph1                 | 100                                   | 9                    | N             | N                         |
| DTXSID0023951       | Carboxin                           | 5234-68-4   | ph1                 | 200                                   | 8                    | N             | N                         |
| DTXSID1032640       | Pyriproxyfen                       | 95737-68-1  | ph1                 | 200                                   | 18                   | N             | N                         |
| DTXSID0032572       | Prallethrin                        | 23031-36-9  | ph1                 | 200                                   | 28                   | N             | N                         |
| DTXSID0020446       | Diuron                             | 330-54-1    | ph1                 | 200                                   | 15                   | N             | N                         |
| DTXSID0023901       | Bentazone                          | 25057-89-0  | ph1                 | 200                                   | 5                    | N             | N                         |
| DTXSID1032355       | Clomazone                          | 81777-89-1  | ph1                 | 200                                   | 7                    | N             | N                         |
| DTXSID0034930       | Fosthiazate                        | 98886-44-3  | ph1                 | 200                                   | 7                    | N             | N                         |
| DTXSID1021409       | Triphenyltin hydroxide             | 76-87-9     | ph1                 | 200                                   | 10                   | N             | N                         |

|               |                      |             |     |     |    |   |   |
|---------------|----------------------|-------------|-----|-----|----|---|---|
| DTXSID0032520 | Azoxystrobin         | 131860-33-8 | ph1 | 200 | 10 | N | N |
| DTXSID0021389 | Trichlorfon          | 52-68-6     | ph1 | 200 | 1  | N | N |
| DTXSID2020426 | Dicloran             | 99-30-9     | ph1 | 200 | 10 | N | N |
| DTXSID1022267 | Methomyl             | 16752-77-5  | ph1 | 200 | 5  | N | N |
| DTXSID0021337 | Thiabendazole        | 148-79-8    | ph1 | 200 | 6  | N | N |
| DTXSID1032690 | Indoxacarb           | 173584-44-6 | ph1 | 160 | -2 | N | N |
| DTXSID1021160 | Picloram             | 1918-02-1   | ph1 | 200 | 0  | N | N |
| DTXSID0024216 | Nitrapyrin           | 1929-82-4   | ph1 | 200 | 14 | N | N |
| DTXSID0021385 | Folpet               | 133-07-3    | ph1 | 200 | 1  | N | N |
| DTXSID0032601 | Cyproconazole        | 94361-06-5  | ph1 | 200 | 6  | N | N |
| DTXSID0032493 | Triadimenol          | 55219-65-3  | ph1 | 200 | 6  | N | N |
| DTXSID1034212 | Spiroxamine          | 118134-30-8 | ph1 | 200 | 13 | N | N |
| DTXSID1024170 | Mepiquat chloride    | 24307-26-4  | ph1 | 200 | 8  | N | N |
| DTXSID2021995 | DEET                 | 134-62-3    | ph1 | 200 | 6  | N | N |
| DTXSID1032359 | Cyprodinil           | 121552-61-2 | ph1 | 200 | 23 | N | N |
| DTXSID1024091 | EPTC                 | 759-94-4    | ph1 | 200 | 7  | N | N |
| DTXSID1024259 | Phosalone            | 2310-17-0   | ph1 | 200 | -1 | N | N |
| DTXSID0034300 | Acetamiprid          | 135410-20-7 | ph1 | 200 | 8  | N | N |
| DTXSID1024174 | Tribufos             | 78-48-8     | ph1 | 200 | 10 | Y | N |
| DTXSID1038666 | Chlorpyrifos oxon    | 5598-15-2   | ph1 | 199 | 9  | N | N |
| DTXSID0032655 | Triticonazole        | 131983-72-7 | ph1 | 199 | 10 | N | N |
| DTXSID1020855 | Methyl parathion     | 298-00-0    | ph1 | 200 | 6  | N | N |
| DTXSID0024266 | Pirimiphos-methyl    | 29232-93-7  | ph1 | 200 | 7  | N | N |
| DTXSID1032519 | Acibenzolar-S-methyl | 135158-54-2 | ph1 | 200 | 4  | N | N |
| DTXSID0032497 | Triclopyr            | 55335-06-3  | ph1 | 204 | 3  | N | N |
| DTXSID1024209 | Naled                | 300-76-5    | ph1 | 200 | 6  | N | N |
| DTXSID2020686 | Lindane              | 58-89-9     | ph1 | 200 | 24 | N | N |
| DTXSID0020319 | Chlorothalonil       | 1897-45-6   | ph1 | 200 | 13 | N | N |
| DTXSID0020022 | Acifluorfen          | 50594-66-6  | ph1 | 200 | 10 | N | N |
| DTXSID0037495 | Deisopropylatrazine  | 1007-28-9   | ph1 | 200 | 1  | N | N |
| DTXSID0034227 | Icaridin             | 119515-38-7 | ph1 | 200 | 5  | N | N |

|               |                                                          |             |     |     |    |   |   |
|---------------|----------------------------------------------------------|-------------|-----|-----|----|---|---|
| DTXSID1032569 | Pirimicarb                                               | 23103-98-2  | ph1 | 200 | 3  | N | N |
| DTXSID0034803 | Penoxsulam                                               | 219714-96-2 | ph1 | 200 | 5  | N | N |
| DTXSID0020442 | 2,4-Dichlorophenoxyacetic acid                           | 94-75-7     | ph1 | 200 | -3 | N | N |
| DTXSID1023998 | Cypermethrin                                             | 52315-07-8  | ph1 | 200 | 5  | N | N |
| DTXSID0034223 | Tebufenpyrad                                             | 119168-77-3 | ph1 | 200 | 11 | N | N |
| DTXSID1032482 | Tebupirimfos                                             | 96182-53-5  | ph1 | 200 | 11 | N | N |
| DTXSID1022265 | Alachlor                                                 | 15972-60-8  | ph1 | 200 | 6  | N | N |
| DTXSID2021105 | Pentachloronitrobenzene                                  | 82-68-8     | ph1 | 200 | -5 | N | N |
| DTXSID0032651 | Thidiazuron                                              | 51707-55-2  | ph1 | 200 | -1 | N | N |
| DTXSID1024338 | Thiophanate-methyl                                       | 23564-05-8  | ph1 | 200 | 4  | N | N |
| DTXSID1020560 | Endosulfan                                               | 115-29-7    | ph1 | 200 | 25 | N | N |
| DTXSID0034566 | Emamectin benzoate                                       | 155569-91-8 | ph1 | 200 | 37 | N | N |
| DTXSID0022018 | Disulfoton                                               | 298-04-4    | ph1 | 89  | 1  | N | N |
| DTXSID0032605 | Methyl (RS)-2-[4-(2,4-dichlorophenoxy)phenoxy]propionate | 51338-27-3  | ph1 | 200 | 11 | N | N |
| DTXSID1034634 | Forchlorfenuron                                          | 68157-60-8  | ph1 | 200 | 2  | N | N |
| DTXSID1023869 | Ametryn                                                  | 834-12-8    | ph1 | 200 | 6  | N | N |
| DTXSID1020194 | Boric acid                                               | 10043-35-3  | ph1 | 200 | 2  | N | N |
| DTXSID0032578 | Thiodicarb                                               | 59669-26-0  | ph1 | 200 | 3  | N | N |
| DTXSID1021166 | Piperonyl butoxide                                       | 51-03-6     | ph1 | 202 | 9  | N | N |
| DTXSID2020420 | Propyzamide                                              | 23950-58-5  | ph1 | 200 | 1  | N | N |
| DTXSID2021151 | 2-Phenylphenol                                           | 90-43-7     | ph1 | 200 | 9  | Y | N |
| DTXSID1034210 | Prodiamine                                               | 29091-21-2  | ph1 | 200 | 19 | N | N |
| DTXSID0039223 | Aldicarb                                                 | 116-06-3    | ph1 | 200 | -2 | N | N |
| DTXSID1023990 | Cyanazine                                                | 21725-46-2  | ph1 | 200 | 9  | N | N |
| DTXSID2020347 | Coumaphos                                                | 56-72-4     | ph1 | 200 | 2  | N | N |
| DTXSID0024002 | Fenpropathrin                                            | 39515-41-8  | ph1 | 200 | 10 | N | N |
| DTXSID1034503 | Cyhalofop-butyl                                          | 122008-85-9 | ph1 | 199 | 15 | N | N |
| DTXSID0034855 | Fluazifop-P-butyl                                        | 79241-46-6  | ph1 | 201 | 11 | N | N |
| DTXSID2032500 | Triflumizole                                             | 68694-11-1  | ph1 | 200 | 33 | Y | N |
| DTXSID2027204 | Methyl isothiocyanate                                    | 556-61-6    | ph1 | 200 | 16 | N | N |

|               |                              |             |     |     |    |   |   |
|---------------|------------------------------|-------------|-----|-----|----|---|---|
| DTXSID4032580 | Trifloxystrobin              | 141517-21-7 | ph1 | 200 | 11 | N | N |
| DTXSID3021196 | Propazine                    | 139-40-2    | ph1 | 200 | 13 | N | N |
| DTXSID3024154 | Iprodione                    | 36734-19-7  | ph1 | 200 | 19 | Y | N |
| DTXSID3024287 | Imazethapyr                  | 81335-77-5  | ph1 | 200 | 16 | N | N |
| DTXSID4022020 | Bromacil                     | 314-40-9    | ph1 | 200 | 19 | Y | N |
| DTXSID4024018 | Dicamba                      | 1918-00-9   | ph1 | 200 | 13 | N | N |
| DTXSID4024195 | MCPA                         | 94-74-6     | ph1 | 200 | 3  | N | N |
| DTXSID2025680 | MEHP                         | 4376-20-9   | ph1 | 203 | 12 | N | N |
| DTXSID4024272 | Prometryn                    | 7287-19-6   | ph1 | 200 | 11 | N | N |
| DTXSID2024242 | Pacllobutrazol               | 76738-62-0  | ph1 | 200 | 6  | N | N |
| DTXSID2032552 | Flufenacet                   | 142459-58-3 | ph1 | 200 | 10 | N | N |
| DTXSID2032550 | Fenpyroximate (Z,E)          | 111812-58-9 | ph1 | 200 | 3  | N | N |
| DTXSID4022448 | Metolachlor                  | 51218-45-2  | ph1 | 200 | 6  | N | N |
| DTXSID3032547 | Etridiazole                  | 2593-15-9   | ph1 | 200 | 10 | N | N |
| DTXSID4020791 | Malathion                    | 121-75-5    | ph1 | 200 | 8  | N | N |
| DTXSID2034590 | Fenamidone                   | 161326-34-7 | ph1 | 200 | -8 | N | N |
| DTXSID3034612 | Fluazifop-butyl              | 69806-50-4  | ph1 | 200 | 1  | N | N |
| DTXSID3034872 | Chloridazon                  | 1698-60-8   | ph1 | 200 | 10 | N | N |
| DTXSID3032464 | Profenofos                   | 41198-08-7  | ph1 | 100 | 12 | N | N |
| DTXSID4032376 | Dimethenamid                 | 87674-68-8  | ph1 | 200 | 3  | N | N |
| DTXSID2039336 | S-Bioallethrin               | 28434-00-6  | ph1 | 200 | 16 | N | N |
| DTXSID4032532 | Carfentrazone-ethyl          | 128639-02-1 | ph1 | 200 | 9  | N | N |
| DTXSID4020242 | Captafol                     | 2425-06-1   | ph1 | 200 | 11 | N | N |
| DTXSID2034673 | Iodosulfuron-methyl-sodium   | 144550-36-7 | ph1 | 200 | 1  | N | N |
| DTXSID2024163 | Linuron                      | 330-55-2    | ph1 | 200 | 5  | N | N |
| DTXSID4024270 | Prochloraz                   | 67747-09-5  | ph1 | 200 | 12 | Y | N |
| DTXSID3034664 | Imazamox                     | 114311-32-9 | ph1 | 200 | -2 | N | N |
| DTXSID4023412 | Oxytetracycline dihydrate    | 6153-64-6   | ph1 | 200 | 17 | N | N |
| DTXSID2026523 | Symclosene                   | 87-90-1     | ph1 | 200 | 1  | N | N |
| DTXSID3031864 | Perfluorooctanesulfonic acid | 1763-23-1   | ph1 | 168 | 41 | Y | N |
| DTXSID2032344 | Chlorethoxyfos               | 54593-83-8  | ph1 | 200 | 3  | N | N |



|               |                    |             |     |     |    |   |   |
|---------------|--------------------|-------------|-----|-----|----|---|---|
| DTXSID2032683 | Mevinphos          | 7786-34-7   | ph1 | 200 | -5 | N | N |
| DTXSID3032337 | Butralin           | 33629-47-9  | ph1 | 200 | 9  | N | N |
| DTXSID3020122 | Azinphos-methyl    | 86-50-0     | ph1 | 200 | 10 | N | N |
| DTXSID2034625 | Fluoxastrobin      | 361377-29-9 | ph1 | 200 | -2 | N | N |
| DTXSID2032392 | Fenoxaprop-ethyl   | 66441-23-4  | ph1 | 200 | -2 | Y | N |
| DTXSID3024235 | Flusilazole        | 85509-19-9  | ph1 | 200 | 10 | N | N |
| DTXSID4022361 | Vinclozolin        | 50471-44-8  | ph1 | 200 | 0  | N | N |
| DTXSID3023897 | Triadimefon        | 43121-43-3  | ph1 | 200 | 2  | N | N |
| DTXSID4021975 | Diphenylamine      | 122-39-4    | ph1 | 200 | 3  | N | N |
| DTXSID3032628 | Methoxyfenozide    | 161050-58-4 | ph1 | 200 | 13 | N | N |
| DTXSID4021268 | Simazine           | 122-34-9    | ph1 | 200 | 0  | N | N |
| DTXSID3024316 | Tebuthiuron        | 34014-18-1  | ph1 | 200 | -8 | N | N |
| DTXSID4021395 | Trifluralin        | 1582-09-8   | ph1 | 200 | -1 | N | N |
| DTXSID4024276 | Propargite         | 2312-35-8   | ph1 | 200 | 24 | N | N |
| DTXSID3024102 | Fenamiphos         | 22224-92-6  | ph1 | 200 | 4  | N | N |
| DTXSID2034881 | Quinoxifen         | 124495-18-7 | ph1 | 200 | 9  | N | N |
| DTXSID3024152 | Imazaquin          | 81335-37-7  | ph1 | 200 | -6 | N | N |
| DTXSID3032549 | Fenhexamid         | 126833-17-8 | ph1 | 200 | 10 | N | N |
| DTXSID2034627 | Fluroxypyr         | 69377-81-7  | ph1 | 200 | -7 | N | N |
| DTXSID3022455 | Dimethyl phthalate | 131-11-3    | ph1 | 200 | -6 | N | N |
| DTXSID3034618 | Flufenpyr-ethyl    | 188489-07-8 | ph1 | 200 | -4 | N | N |
| DTXSID4024145 | Hexazinone         | 51235-04-2  | ph1 | 200 | -8 | N | N |
| DTXSID2032637 | Pymetrozine        | 123312-89-0 | ph1 | 200 | -8 | N | N |
| DTXSID3034456 | Cinmethylin        | 87818-31-3  | ph1 | 200 | 10 | N | N |
| DTXSID2032556 | Fluthiacet-methyl  | 117337-19-6 | ph1 | 200 | 11 | N | N |
| DTXSID4020450 | Dicofol            | 115-32-2    | ph1 | 200 | 48 | Y | N |
| DTXSID2032390 | Fenarimol          | 60168-88-9  | ph1 | 200 | 21 | Y | N |
| DTXSID2040363 | Diniconazole       | 83657-24-3  | ph1 | 200 | 32 | N | N |
| DTXSID3024239 | Oxadiazon          | 19666-30-9  | ph1 | 200 | 12 | N | N |
| DTXSID2032398 | Fludioxonil        | 131341-86-1 | ph1 | 200 | 3  | N | N |
| DTXSID3023899 | Benfluralin        | 1861-40-1   | ph1 | 200 | 8  | N | N |

|               |                                      |             |     |     |    |   |   |
|---------------|--------------------------------------|-------------|-----|-----|----|---|---|
| DTXSID2040361 | Metam-sodium hydrate                 | 6734-80-1   | ph1 | 200 | -2 | N | N |
| DTXSID2034962 | Thiamethoxam                         | 153719-23-4 | ph1 | 200 | 0  | N | N |
| DTXSID2034465 | Clothianidin                         | 210880-92-5 | ph1 | 200 | -2 | N | N |
| DTXSID4032405 | Formetanate hydrochloride            | 23422-53-9  | ph1 | 201 | 4  | N | N |
| DTXSID2024793 | Chloroneb                            | 2675-77-6   | ph1 | 200 | 4  | N | N |
| DTXSID4032372 | Difenoconazole                       | 119446-68-3 | ph1 | 200 | 2  | Y | N |
| DTXSID3034402 | Butachlor                            | 23184-66-9  | ph1 | 200 | 16 | N | N |
| DTXSID2032554 | Flumiclorac-pentyl                   | 87546-18-7  | ph1 | 200 | 13 | N | N |
| DTXSID9023881 | Clofentezine                         | 74115-24-5  | ph1 | 200 | 1  | N | N |
| DTXSID5020607 | Di(2-ethylhexyl) phthalate           | 117-81-7    | ph1 | 200 | -2 | N | N |
| DTXSID6032358 | Cymoxanil                            | 57966-95-7  | ph1 | 200 | 8  | N | N |
| DTXSID4032611 | Ethoprop                             | 13194-48-4  | ph1 | 200 | 9  | N | N |
| DTXSID6024048 | Difenzoquat metilsulfate             | 43222-48-6  | ph1 | 200 | 2  | N | N |
| DTXSID5032365 | Dichlobenil                          | 1194-65-6   | ph1 | 200 | 3  | N | N |
| DTXSID5024211 | Napropamide                          | 15299-99-7  | ph1 | 200 | 10 | Y | N |
| DTXSID5020819 | Methidathion                         | 950-37-8    | ph1 | 200 | 16 | N | N |
| DTXSID6032356 | Cycloate                             | 1134-23-2   | ph1 | 200 | 6  | N | N |
| DTXSID7022253 | Resmethrin                           | 10453-86-8  | ph1 | 200 | 20 | N | N |
| DTXSID4032667 | Esfenvalerate                        | 66230-04-4  | ph1 | 200 | 7  | Y | N |
| DTXSID6024337 | Thiobencarb                          | 28249-77-6  | ph1 | 200 | 4  | N | N |
| DTXSID7031248 | Diquat dibromide monohydrate         | 6385-62-2   | ph1 | 100 | 90 | Y | N |
| DTXSID6024204 | Metribuzin                           | 21087-64-9  | ph1 | 200 | -5 | N | N |
| DTXSID7024245 | Pendimethalin                        | 40487-42-1  | ph1 | 200 | 14 | N | N |
| DTXSID5023900 | Benomyl                              | 17804-35-2  | ph1 | 200 | 14 | N | N |
| DTXSID5037523 | Diazoxon                             | 962-58-3    | ph1 | 201 | 11 | Y | N |
| DTXSID6021086 | Oxamyl                               | 23135-22-0  | ph1 | 200 | 0  | N | N |
| DTXSID5021332 | Thiram                               | 137-26-8    | ph1 | 200 | 6  | N | N |
| DTXSID6032647 | 2-(Thiocyanomethylthio)benzothiazole | 21564-17-0  | ph1 | 200 | 2  | N | N |
| DTXSID5032525 | Bifenazate                           | 149877-41-8 | ph1 | 200 | 6  | N | N |
| DTXSID5020601 | Ethylene thiourea                    | 96-45-7     | ph1 | 200 | 4  | N | N |
| DTXSID4034948 | Tebufenozide                         | 112410-23-8 | ph1 | 200 | 0  | N | N |

|               |                                  |             |     |     |    |   |   |
|---------------|----------------------------------|-------------|-----|-----|----|---|---|
| DTXSID6022341 | Prometon                         | 1610-18-0   | ph1 | 200 | 5  | N | N |
| DTXSID5020449 | Dichlorvos                       | 62-73-7     | ph1 | 100 | 12 | N | N |
| DTXSID5023871 | Amitraz                          | 33089-61-1  | ph1 | 200 | 35 | N | N |
| DTXSID6024175 | Metalaxyl                        | 57837-19-1  | ph1 | 200 | 4  | N | N |
| DTXSID4032613 | Fenitrothion                     | 122-14-5    | ph1 | 200 | 4  | N | N |
| DTXSID5024182 | 2-Methoxyethanol                 | 109-86-4    | ph1 | 200 | 2  | N | N |
| DTXSID6034265 | Clopyralid-olamine               | 57754-85-5  | ph1 | 200 | 1  | N | N |
| DTXSID7024035 | 2,4-Dichlorophenoxybutyric acid  | 94-82-6     | ph1 | 203 | 8  | N | N |
| DTXSID5034723 | Isoxaflutole                     | 141112-29-0 | ph1 | 200 | 2  | N | N |
| DTXSID6032645 | Sulfentrazone                    | 122836-35-5 | ph1 | 200 | 10 | N | N |
| DTXSID5034270 | Imazapic                         | 104098-48-8 | ph1 | 200 | 9  | N | N |
| DTXSID7024085 | Ethephon                         | 16672-87-0  | ph1 | 200 | 5  | N | N |
| DTXSID5032577 | Tefluthrin                       | 79538-32-2  | ph1 | 200 | 8  | N | N |
| DTXSID6034928 | Spirodiclofen                    | 148477-71-8 | ph1 | 200 | 4  | N | N |
| DTXSID5034303 | Fluroxypyr-meptyl                | 81406-37-3  | ph1 | 200 | 22 | N | N |
| DTXSID6032562 | Octylbicycloheptenedicarboximide | 113-48-4    | ph1 | 200 | 27 | N | N |
| DTXSID7020764 | Chlorpropham                     | 101-21-3    | ph1 | 200 | 11 | N | N |
| DTXSID6032352 | Chlorpyrifos-methyl              | 5598-13-0   | ph1 | 200 | 11 | N | N |
| DTXSID5020154 | Chlorophene                      | 120-32-1    | ph1 | 202 | 36 | N | N |
| DTXSID7024160 | Lactofen                         | 77501-63-4  | ph1 | 200 | 7  | N | N |
| DTXSID6032641 | Quinclorac                       | 84087-01-4  | ph1 | 200 | 15 | N | N |
| DTXSID5032600 | Cyclanilide                      | 113136-77-9 | ph1 | 200 | 23 | N | N |
| DTXSID6023999 | Cyromazine                       | 66215-27-8  | ph1 | 200 | 5  | N | N |
| DTXSID7024299 | Hexythiazox                      | 78587-05-0  | ph1 | 200 | 3  | N | N |
| DTXSID5034773 | Novaluron                        | 116714-46-6 | ph1 | 100 | -4 | N | N |
| DTXSID4034609 | Fipronil                         | 120068-37-3 | ph1 | 201 | 14 | N | N |
| DTXSID4032615 | Flumetsulam                      | 98967-40-9  | ph1 | 200 | -3 | N | N |
| DTXSID4034653 | Hexaconazole                     | 79983-71-4  | ph1 | 200 | 16 | N | N |
| DTXSID6024206 | Molinate                         | 2212-67-1   | ph1 | 200 | 14 | N | N |
| DTXSID7032393 | Fenoxycarb                       | 72490-01-8  | ph1 | 200 | 14 | N | N |
| DTXSID7021948 | Propoxur                         | 114-26-1    | ph1 | 200 | 3  | N | N |

|               |                                                                 |             |     |     |    |   |   |
|---------------|-----------------------------------------------------------------|-------------|-----|-----|----|---|---|
| DTXSID7024902 | Dazomet                                                         | 533-74-4    | ph1 | 200 | 7  | N | N |
| DTXSID7020508 | Dimethylarsinic acid                                            | 75-60-5     | ph1 | 200 | 3  | N | N |
| DTXSID6024177 | Methamidophos                                                   | 10265-92-6  | ph1 | 200 | -8 | N | N |
| DTXSID5032573 | Pyridaben                                                       | 96489-71-3  | ph1 | 200 | 1  | N | N |
| DTXSID6032354 | Clodinafop-propargyl                                            | 105512-06-9 | ph1 | 200 | 9  | N | N |
| DTXSID7023936 | Butylate                                                        | 2008-41-5   | ph1 | 200 | 18 | N | N |
| DTXSID5035957 | Cyfluthrin                                                      | 68359-37-5  | ph1 | 200 | 22 | N | N |
| DTXSID4034528 | Diclosulam                                                      | 145701-21-9 | ph1 | 200 | 39 | N | N |
| DTXSID6034392 | Boscalid                                                        | 188425-85-6 | ph1 | 200 | -9 | N | N |
| DTXSID7020479 | Dimethoate                                                      | 60-51-5     | ph1 | 200 | 3  | N | N |
| DTXSID5024344 | Tri-allate                                                      | 2303-17-5   | ph1 | 200 | 17 | N | N |
| DTXSID7021100 | Parathion                                                       | 56-38-2     | ph1 | 100 | 13 | N | N |
| DTXSID7024241 | Oxyfluorfen                                                     | 42874-03-3  | ph1 | 200 | 11 | N | N |
| DTXSID6032649 | Tetramethrin                                                    | 7696-12-0   | ph1 | 200 | 21 | N | N |
| DTXSID6021248 | Rotenone                                                        | 83-79-4     | ph1 | 200 | 3  | N | N |
| DTXSID4040002 | Monobutyl phthalate                                             | 131-70-4    | ph1 | 200 | 12 | N | N |
| DTXSID5032442 | Imidacloprid                                                    | 138261-41-3 | ph1 | 200 | 7  | N | N |
| DTXSID6034849 | Propamocarb hydrochloride                                       | 25606-41-1  | ph1 | 200 | 14 | N | N |
| DTXSID8022292 | Permethrin                                                      | 52645-53-1  | ph1 | 200 | -9 | N | N |
| DTXSID8034742 | Milbemectin (mixture of 70%<br>Milbemcin A4, 30% Milbemycin A3) | NOCAS_34742 | ph1 | 195 | 37 | N | N |
| DTXSID8034956 | Tetraconazole                                                   | 112281-77-3 | ph1 | 199 | 7  | N | N |
| DTXSID8024238 | Oryzalin                                                        | 19044-88-3  | ph1 | 200 | 31 | N | N |
| DTXSID8024280 | Propiconazole                                                   | 60207-90-1  | ph1 | 200 | 16 | N | N |
| DTXSID8031865 | Perfluorooctanoic acid                                          | 335-67-1    | ph1 | 200 | 10 | N | N |
| DTXSID9020247 | Carbaryl                                                        | 63-25-2     | ph1 | 200 | -1 | N | N |
| DTXSID9020792 | Maleic hydrazide                                                | 123-33-1    | ph1 | 200 | 17 | N | N |
| DTXSID9032329 | Bensulide                                                       | 741-58-2    | ph1 | 200 | 14 | N | N |
| DTXSID8024109 | Flutolanil                                                      | 66332-96-5  | ph1 | 200 | 9  | Y | N |
| DTXSID8020620 | Fenthion                                                        | 55-38-9     | ph1 | 200 | -2 | N | N |
| DTXSID8032386 | Ethalfuralin                                                    | 55283-68-6  | ph1 | 200 | 3  | N | N |

|               |                         |             |     |     |    |   |   |
|---------------|-------------------------|-------------|-----|-----|----|---|---|
| DTXSID8024159 | Isoxaben                | 82558-50-7  | ph1 | 200 | 1  | N | N |
| DTXSID9032327 | Bendiocarb              | 22781-23-3  | ph1 | 200 | 11 | N | N |
| DTXSID8024234 | Norflurazon             | 27314-13-2  | ph1 | 200 | 7  | N | N |
| DTXSID7034545 | Dimethomorph            | 110488-70-5 | ph1 | 200 | 2  | N | N |
| DTXSID8023892 | Abamectin               | 71751-41-2  | ph1 | 121 | 7  | N | N |
| DTXSID8034401 | Buprofezin              | 69327-76-0  | ph1 | 200 | 17 | N | N |
| DTXSID9024304 | Sethoxydim              | 74051-80-2  | ph1 | 201 | 3  | N | N |
| DTXSID9032581 | Zoxamide                | 156052-68-5 | ph1 | 201 | 7  | N | N |
| DTXSID7040362 | Niclosamide             | 50-65-7     | ph1 | 100 | 7  | N | N |
| DTXSID8023846 | Acephate                | 30560-19-1  | ph1 | 200 | -1 | N | N |
| DTXSID8024315 | Myclobutanil            | 88671-89-0  | ph1 | 200 | 5  | N | N |
| DTXSID9034818 | Azamethiphos            | 35575-96-3  | ph1 | 200 | -2 | N | N |
| DTXSID8035180 | Allethrin               | 584-79-2    | ph1 | 210 | 18 | N | N |
| DTXSID8022111 | Propanil                | 709-98-8    | ph1 | 200 | 1  | N | N |
| DTXSID9020243 | Captan                  | 133-06-2    | ph1 | 197 | 7  | N | N |
| DTXSID9020112 | Atrazine                | 1912-24-9   | ph1 | 200 | -2 | N | N |
| DTXSID9040001 | Monomethyl phthalate    | 4376-18-5   | ph1 | 200 | -3 | N | N |
| DTXSID9020370 | Daminozide              | 1596-84-5   | ph1 | 200 | -3 | N | N |
| DTXSID8034665 | Imazapyr                | 81334-34-1  | ph1 | 200 | -9 | N | N |
| DTXSID9034232 | Cloprop                 | 101-10-0    | ph1 | 200 | -5 | N | N |
| DTXSID9020827 | Methoxychlor            | 72-43-5     | ph1 | 199 | 5  | N | N |
| DTXSID7034961 | Thiacloprid             | 111988-49-9 | ph1 | 200 | 5  | N | N |
| DTXSID9023889 | Quizalofop-ethyl        | 76578-14-8  | ph1 | 172 | 11 | N | N |
| DTXSID8034588 | Famoxadone              | 131807-57-3 | ph1 | 201 | 8  | N | N |
| DTXSID8024151 | Imazalil                | 35554-44-0  | ph1 | 200 | 5  | N | N |
| DTXSID9020407 | Diazinon                | 333-41-5    | ph1 | 200 | -8 | N | N |
| DTXSID9034864 | Propoxycarbazone-sodium | 181274-15-7 | ph1 | 200 | -4 | N | N |
| DTXSID8034586 | Etoxazole               | 153233-91-1 | ph1 | 132 | 0  | N | N |
| DTXSID9034365 | Butafenacil             | 134605-64-4 | ph1 | 201 | 11 | N | N |
| DTXSID8032548 | Fenbuconazole           | 114369-43-6 | ph1 | 200 | 4  | N | N |
| DTXSID8034877 | Pyrimethanil            | 53112-28-0  | ph1 | 200 | 7  | N | N |

|               |                                                |             |     |     |    |   |   |
|---------------|------------------------------------------------|-------------|-----|-----|----|---|---|
| DTXSID8032673 | Pyriithiobac-sodium                            | 123343-16-8 | ph1 | 200 | 1  | N | N |
| DTXSID9029221 | Clopyralid                                     | 1702-17-6   | ph1 | 200 | 1  | N | N |
| DTXSID8034580 | Ethofumesate                                   | 26225-79-6  | ph1 | 200 | -5 | N | N |
| DTXSID7032553 | Flumetralin                                    | 62924-70-3  | ph1 | 200 | -2 | N | N |
| DTXSID9034490 | Cyanamide                                      | 420-04-2    | ph1 | 200 | -2 | N | N |
| DTXSID9020790 | Malaoxon                                       | 1634-78-2   | ph1 | 200 | 1  | N | N |
| DTXSID9034492 | Cyazofamid                                     | 120116-88-3 | ph1 | 200 | 19 | N | N |
| DTXSID7032638 | Pyraclostrobin                                 | 175013-18-0 | ph1 | 200 | 4  | N | N |
| DTXSID7032555 | Flumioxazin                                    | 103361-09-7 | ph1 | 200 | 7  | N | N |
| DTXSID9034816 | Monocrotophos                                  | 6923-22-4   | ph1 | 200 | 8  | N | N |
| DTXSID8024317 | Terbacil                                       | 5902-51-2   | ph1 | 200 | 1  | N | N |
| DTXSID8034871 | Pyraflufen-ethyl                               | 129630-19-9 | ph1 | 200 | 1  | N | N |
| DTXSID8020628 | Fluometuron                                    | 2164-17-2   | ph1 | 200 | 0  | N | N |
| DTXSID9020794 | Maneb                                          | 12427-38-2  | ph1 | 100 | -2 | N | N |
| DTXSID8040222 | Trifloxysulfuron-sodium                        | 199119-58-9 | ph1 | 200 | -6 | N | N |
| DTXSID9021976 | 2-Phenoxyethanol                               | 122-99-6    | ph1 | 200 | -7 | N | N |
| DTXSID7034252 | Tepraloxymid                                   | 149979-41-9 | ph1 | 200 | -2 | N | N |
| DTXSID9023914 | Dicrotophos                                    | 141-66-2    | ph1 | 201 | -6 | N | N |
| DTXSID9032379 | Dithiopyr                                      | 97886-45-8  | ph1 | 199 | 3  | N | N |
| DTXSID7032551 | Fluazinam                                      | 79622-59-6  | ph1 | 200 | 40 | N | N |
| DTXSID8023890 | Asulam                                         | 3337-71-1   | ph1 | 200 | 6  | N | N |
| DTXSID7032424 | Mesotrione                                     | 104206-82-8 | ph1 | 200 | -3 | N | N |
| DTXSID9020089 | Anilazine                                      | 101-05-3    | ph1 | 200 | 0  | N | N |
| DTXSID7034676 | Isazofos                                       | 42509-80-8  | ph1 | 200 | 5  | N | N |
| DTXSID8032544 | Dipropyl 2,5-pyridinedicarboxylate             | 136-45-8    | ph1 | 200 | -2 | N | N |
| DTXSID8022325 | 2,2-Bis(4-hydroxyphenyl)-1,1,1-trichloroethane | 2971-36-0   | ph1 | 200 | 24 | N | N |
| DTXSID9020160 | Bifenthrin                                     | 82657-04-3  | ph1 | 200 | 16 | N | N |
| DTXSID7032470 | Propetamphos                                   | 31218-83-4  | ph1 | 200 | 8  | N | N |
| DTXSID4024066 | 1,2-Dinitrobenzene                             | 528-29-0    | ph2 | 200 | 61 | Y | N |
| DTXSID8026773 | 1,3-Butanediol                                 | 107-88-0    | ph2 | 200 | -1 | N | N |

|               |                                                                    |             |     |     |    |   |   |
|---------------|--------------------------------------------------------------------|-------------|-----|-----|----|---|---|
| DTXSID8027034 | 2-(Hydroxymethyl)-2-nitro-1,3-propanediol                          | 126-11-4    | ph2 | 200 | 0  | N | N |
| DTXSID9020877 | 1-Methylnaphthalene                                                | 90-12-0     | ph2 | 200 | 0  | N | N |
| DTXSID6020147 | 1,2,3-Benzotriazole                                                | 95-14-7     | ph2 | 200 | 3  | N | N |
| DTXSID4021137 | 1,3-Benzenediamine                                                 | 108-45-2    | ph2 | 200 | -4 | N | N |
| DTXSID0020440 | Dichlorprop                                                        | 120-36-5    | ph1 | 200 | -2 | N | N |
| DTXSID6025010 | 1,3-Dichloro-2-propanol                                            | 96-23-1     | ph2 | 200 | 1  | N | N |
| DTXSID3035341 | 1,3-Dibromo-5,5-dimethylhydantoin                                  | 77-48-5     | ph2 | 200 | 2  | N | N |
| DTXSID4042206 | 1-Dodecyl-2-pyrrolidinone                                          | 2687-96-9   | ph2 | 200 | 31 | N | N |
| DTXSID8024284 | 1-Methoxy-2-propanol                                               | 107-98-2    | ph2 | 200 | 1  | N | N |
| DTXSID0021965 | 1,2,4-Trichlorobenzene                                             | 120-82-1    | ph2 | 200 | -3 | N | N |
| DTXSID5020576 | 17alpha-Ethinylestradiol                                           | 57-63-6     | ph2 | 0.2 | -5 | N | N |
| DTXSID3047261 | (2S,3S)-3-Methyl-2-(3-oxo-1,2-benzothiazol-2(3H)-yl)pentanoic acid | 177785-47-6 | ph2 | 200 | -1 | N | N |
| DTXSID2021947 | 1-Tridecanol                                                       | 112-70-9    | ph2 | 206 | 19 | N | N |
| DTXSID8021195 | 1,3-Propane sultone                                                | 1120-71-4   | ph2 | 200 | 1  | N | N |
| DTXSID6021402 | 1,2,4-Trimethylbenzene                                             | 95-63-6     | ph2 | 208 | 7  | N | N |
| DTXSID8027581 | 1,5,9-Cyclododecatriene                                            | 4904-61-4   | ph2 | 200 | 2  | N | N |
| DTXSID7025132 | 1,2-Dimethyl-3-nitrobenzene                                        | 83-41-0     | ph2 | 200 | 2  | N | N |
| DTXSID2022331 | 2-(Butan-2-yl)phenol                                               | 89-72-5     | ph2 | 200 | 1  | N | N |
| DTXSID3025881 | 1,2-Phenylenediamine                                               | 95-54-5     | ph2 | 200 | 9  | N | N |
| DTXSID7020710 | 1,2-Diphenylhydrazine                                              | 122-66-7    | ph2 | 200 | 9  | N | N |
| DTXSID1038298 | 1-Hydroxypyrene                                                    | 5315-79-7   | ph2 | 200 | 20 | N | N |
| DTXSID4026684 | 2-(Phenylmethylene)octanal                                         | 101-86-0    | ph2 | 200 | 22 | N | N |
| DTXSID8026193 | 1,2,3-Trichlorobenzene                                             | 87-61-6     | ph2 | 200 | 3  | N | N |
| DTXSID9047257 | Zamifenacin                                                        | 127308-82-1 | ph2 | 200 | 1  | N | N |
| DTXSID8044593 | 1-Benzylquinolinium chloride                                       | 15619-48-4  | ph2 | 200 | -1 | N | N |
| DTXSID9020087 | (E)-Anethole                                                       | 4180-23-8   | ph2 | 200 | 2  | N | N |
| DTXSID0026915 | 1-Undecanol                                                        | 112-42-5    | ph2 | 200 | 16 | N | N |
| DTXSID7021946 | 1-Decanol                                                          | 112-30-1    | ph2 | 200 | 12 | N | N |
| DTXSID8035001 | 10-Undecenoic acid                                                 | 112-38-9    | ph2 | 200 | 3  | N | N |

|               |                                                                        |             |     |     |    |   |   |
|---------------|------------------------------------------------------------------------|-------------|-----|-----|----|---|---|
| DTXSID5044493 | 1-[3-(Triethoxysilyl)propyl]urea                                       | 23779-32-0  | ph2 | 200 | -2 | N | N |
| DTXSID7024320 | 1,2,4,5-Tetrachlorobenzene                                             | 95-94-3     | ph2 | 200 | 0  | N | N |
| DTXSID6027131 | 1H-1,2,4-Triazole                                                      | 288-88-0    | ph2 | 200 | -5 | N | N |
| DTXSID8022377 | 17alpha-Estradiol                                                      | 57-91-0     | ph2 | 200 | -5 | N | N |
| DTXSID8026640 | 1,3-Diisopropylbenzene                                                 | 99-62-7     | ph2 | 200 | -2 | N | N |
| DTXSID9026926 | 1-Tetradecanol                                                         | 112-72-1    | ph2 | 200 | 14 | N | N |
| DTXSID9024065 | 1,3-Dinitrobenzene                                                     | 99-65-0     | ph2 | 207 | 16 | N | N |
| DTXSID5026918 | 1-Dodecanol                                                            | 112-53-8    | ph2 | 200 | 9  | N | N |
| DTXSID2025133 | 1,2-Dimethyl-4-nitrobenzene                                            | 99-51-4     | ph2 | 200 | -2 | N | N |
| DTXSID0047296 | Zenarestat                                                             | 112733-06-9 | ph2 | 100 | 4  | N | N |
| DTXSID6022056 | 1,3-Dichlorobenzene                                                    | 541-73-1    | ph2 | 200 | 1  | N | N |
| DTXSID1020431 | 1,4-Dichlorobenzene                                                    | 106-46-7    | ph2 | 200 | 1  | N | N |
| DTXSID4027367 | 1-Tetradecene                                                          | 1120-36-1   | ph2 | 200 | 7  | N | N |
| DTXSID0034192 | 17beta-Trenbolone                                                      | 10161-33-8  | ph2 | 0.2 | -4 | N | N |
| DTXSID5032523 | 1,2-Benzisothiazolin-3-one                                             | 2634-33-5   | ph2 | 200 | -4 | N | N |
| DTXSID3026728 | (2Z)-3,7-Dimethylocta-2,6-dien-1-ol                                    | 106-25-2    | ph2 | 200 | 5  | N | N |
| DTXSID8021519 | 2-(2-Butoxyethoxy)ethanol                                              | 112-34-5    | ph2 | 200 | -1 | N | N |
| DTXSID6032514 | 1,2-Benzenedicarboxaldehyde                                            | 643-79-8    | ph2 | 200 | 63 | Y | N |
| DTXSID1048176 | YM218                                                                  | NOCAS_48176 | ph2 | 125 | -1 | N | N |
| DTXSID4027991 | 1-Hexadecanol                                                          | 36653-82-4  | ph2 | 100 | 1  | N | N |
| DTXSID4024985 | 1,3-Dichloro-5,5-dimethylhydantoin                                     | 118-52-5    | ph2 | 200 | -2 | N | N |
| DTXSID6035152 | 1-(Hydroxymethyl)-5,5-dimethylhydantoin                                | 116-25-6    | ph2 | 200 | -1 | N | N |
| DTXSID6020430 | 1,2-Dichlorobenzene                                                    | 95-50-1     | ph2 | 200 | 3  | N | N |
| DTXSID0021206 | 1,2-Propylene glycol                                                   | 57-55-6     | ph2 | 200 | -4 | N | N |
| DTXSID0028666 | 1,2-Benzenedicarboxylic acid, di-C9-11-branched alkyl esters, C10-rich | 68515-49-1  | ph2 | 200 | -3 | N | N |
| DTXSID5020281 | 1-Chloro-4-nitrobenzene                                                | 100-00-5    | ph2 | 200 | 1  | N | N |
| DTXSID3020916 | 1,5-Naphthalenediamine                                                 | 2243-62-1   | ph2 | 200 | 20 | N | N |
| DTXSID3025178 | 1,3-Diphenylguanidine                                                  | 102-06-7    | ph2 | 200 | -1 | N | N |
| DTXSID9021390 | 1,2,3-Trichloropropane                                                 | 96-18-4     | ph2 | 200 | 4  | N | N |



|               |                                                                                   |             |     |     |    |   |   |
|---------------|-----------------------------------------------------------------------------------|-------------|-----|-----|----|---|---|
| DTXSID3021485 | 1,3-Benzenedicarboxylic acid                                                      | 121-91-5    | ph2 | 200 | 8  | N | N |
| DTXSID6040747 | 17alpha-Hydroxyprogesterone                                                       | 68-96-2     | ph2 | 200 | 2  | N | N |
| DTXSID7021940 | 1-Octanol                                                                         | 111-87-5    | ph2 | 207 | 0  | N | N |
| DTXSID0020573 | 17beta-Estradiol                                                                  | 50-28-2     | ph2 | 200 | -3 | N | N |
| DTXSID9047259 | 1,3-Dichloro-6,7,8,9,10,12-hexahydroazepino[2,1-b]quinazoline hydrochloride (1:1) | 149062-75-9 | ph2 | 100 | 10 | Y | N |
| DTXSID0027270 | 1-Pentadecanol                                                                    | 629-76-5    | ph2 | 200 | 1  | N | N |
| DTXSID1033664 | 17-Methyltestosterone                                                             | 58-18-4     | ph2 | 0.2 | 10 | N | N |
| DTXSID2021941 | 2-(2-Ethoxyethoxy)ethanol                                                         | 111-90-0    | ph2 | 200 | -2 | N | N |
| DTXSID8026307 | 2,6-Dimethylaniline                                                               | 87-62-7     | ph2 | 207 | -7 | N | N |
| DTXSID9025110 | 2,5-Dimethyl-2,5-di-(tert-butylperoxy)hexane                                      | 78-63-7     | ph2 | 200 | 10 | N | N |
| DTXSID6020068 | 2-Aminoanthraquinone                                                              | 117-79-3    | ph2 | 200 | 11 | N | N |
| DTXSID4020959 | 2-Methyl-5-nitroaniline                                                           | 99-55-8     | ph2 | 200 | 15 | N | N |
| DTXSID7024087 | 2-Ethoxyethanol                                                                   | 110-80-5    | ph2 | 200 | 8  | N | N |
| DTXSID5021386 | 2,4,6-Trichlorophenol                                                             | 88-06-2     | ph2 | 200 | 8  | N | N |
| DTXSID1020807 | 2-Mercaptobenzothiazole                                                           | 149-30-4    | ph2 | 200 | 9  | Y | N |
| DTXSID4024359 | 2,4,5-Trichlorophenol                                                             | 95-95-4     | ph2 | 200 | 18 | Y | N |
| DTXSID2026525 | 2-tert-Butylphenol                                                                | 88-18-6     | ph2 | 200 | 6  | N | N |
| DTXSID4027494 | 2,3-Diaminotoluene                                                                | 2687-25-4   | ph2 | 200 | 18 | N | N |
| DTXSID6020141 | 2,3-Benzofuran                                                                    | 271-89-6    | ph2 | 200 | 2  | N | N |
| DTXSID3024657 | 3-Bromo-1-propanol                                                                | 627-18-9    | ph2 | 200 | 5  | N | N |
| DTXSID5027061 | 2-Naphthalenol                                                                    | 135-19-3    | ph2 | 200 | 11 | N | N |
| DTXSID4024062 | 3,4-Dimethylphenol                                                                | 95-65-8     | ph2 | 205 | 15 | N | N |
| DTXSID5020605 | 2-Ethyl-1-hexanol                                                                 | 104-76-7    | ph2 | 200 | 8  | N | N |
| DTXSID7027041 | 2,4,7,9-Tetramethyl-5-decyne-4,7-diol                                             | 126-86-3    | ph2 | 200 | 3  | N | N |
| DTXSID5021885 | 2-Methyl-2,4-pentanediol                                                          | 107-41-5    | ph2 | 209 | 1  | N | N |
| DTXSID9021928 | Ethylene glycol monoethyl ether acetate                                           | 111-15-9    | ph2 | 200 | 3  | N | N |
| DTXSID9024063 | 2,6-Dimethylphenol                                                                | 576-26-1    | ph2 | 200 | 9  | N | N |

|               |                                               |            |     |     |    |   |   |
|---------------|-----------------------------------------------|------------|-----|-----|----|---|---|
| DTXSID1027635 | 2,2,4-Trimethyl-1,3-pentanediol diisobutyrate | 6846-50-0  | ph2 | 200 | 15 | N | N |
| DTXSID5024059 | 3,3'-Dimethylbenzidine                        | 119-93-7   | ph2 | 200 | 1  | N | N |
| DTXSID7029241 | 2,4-Bis(1-methyl-1-phenylethyl)phenol         | 2772-45-4  | ph2 | 200 | 61 | Y | N |
| DTXSID0020529 | 2,4-Dinitrotoluene                            | 121-14-2   | ph2 | 200 | 5  | N | N |
| DTXSID3021277 | 2E,4E-Hexadienoic acid                        | 110-44-1   | ph2 | 200 | -8 | N | N |
| DTXSID4044581 | 2-tert-Butyl-4-ethylphenol                    | 96-70-8    | ph2 | 200 | 20 | N | N |
| DTXSID6027052 | 2,6-Di-tert-butylphenol                       | 128-39-2   | ph2 | 200 | 21 | Y | N |
| DTXSID6025145 | 2,5-Dimethylphenol                            | 95-87-4    | ph2 | 205 | 7  | N | N |
| DTXSID2021864 | 2,4-Dimethylphenol                            | 105-67-9   | ph2 | 207 | 0  | N | N |
| DTXSID8020127 | 3'-Azido-3'-deoxythymidine                    | 30516-87-1 | ph2 | 200 | 0  | N | N |
| DTXSID2026602 | 2,4-Di-tert-butylphenol                       | 96-76-4    | ph2 | 200 | 56 | Y | N |
| DTXSID1022053 | 2-Methyl-4,6-dinitrophenol                    | 534-52-1   | ph2 | 200 | 7  | N | N |
| DTXSID5020528 | 2,6-Dinitrotoluene                            | 606-20-2   | ph2 | 200 | -8 | N | N |
| DTXSID8024999 | 3,4-Dichloronitrobenzene                      | 99-54-7    | ph2 | 200 | -8 | N | N |
| DTXSID9025293 | 2-Ethylhexanoic acid                          | 149-57-5   | ph2 | 200 | 5  | N | N |
| DTXSID1020350 | 2-Methoxy-5-methylaniline                     | 120-71-8   | ph2 | 200 | -2 | N | N |
| DTXSID1020439 | 2,4-Dichlorophenol                            | 120-83-2   | ph2 | 200 | 7  | N | N |
| DTXSID1021821 | 2-Butanone oxime                              | 96-29-7    | ph2 | 200 | -3 | N | N |
| DTXSID0020943 | 2-Methoxy-5-nitroaniline                      | 99-59-2    | ph2 | 200 | -1 | N | N |
| DTXSID1026164 | 2-Methylaniline                               | 95-53-4    | ph2 | 200 | -2 | N | N |
| DTXSID6024836 | 3,7-Dimethyl-2,6-octadienal                   | 5392-40-5  | ph2 | 200 | 3  | N | N |
| DTXSID1021877 | 2-Chloroethanol                               | 107-07-3   | ph2 | 200 | -4 | N | N |
| DTXSID2026529 | 2-Tert-Butyl-5-methylphenol                   | 88-60-8    | ph2 | 200 | 23 | N | N |
| DTXSID6022927 | 2',3'-Dideoxyinosine                          | 69655-05-6 | ph2 | 200 | -2 | N | N |
| DTXSID1024097 | 2-Butoxyethanol                               | 111-76-2   | ph2 | 200 | 3  | N | N |
| DTXSID5032361 | 2,2-Dibromo-3-nitrilopropionamide             | 10222-01-2 | ph2 | 200 | 6  | N | N |
| DTXSID3024368 | 2-[2-(2-Ethoxyethoxy)ethoxy]ethanol           | 112-50-5   | ph2 | 200 | -2 | N | N |
| DTXSID1026908 | 2-Hexyloxyethanol                             | 112-25-4   | ph2 | 200 | 0  | N | N |
| DTXSID1026081 | 3,3',5,5'-Tetrabromobisphenol A               | 79-94-7    | ph2 | 191 | 70 | Y | N |
| DTXSID4027236 | 2,3-Dinitrotoluene                            | 602-01-7   | ph2 | 143 | 25 | N | N |

|               |                                            |            |     |     |    |   |   |
|---------------|--------------------------------------------|------------|-----|-----|----|---|---|
| DTXSID9020293 | 2-Chloroacetophenone                       | 532-27-4   | ph2 | 200 | -1 | N | N |
| DTXSID9044742 | 2,2'-[Ethane-1,2-diylbis(oxy)]diethanamine | 929-59-9   | ph2 | 200 | 7  | N | N |
| DTXSID8041248 | 2,5-Di-tert-butylbenzene-1,4-diol          | 88-58-4    | ph2 | 200 | 6  | N | N |
| DTXSID0020523 | 2,4-Dinitrophenol                          | 51-28-5    | ph2 | 200 | 6  | N | N |
| DTXSID5023877 | 2-Anisidine                                | 90-04-0    | ph2 | 203 | 11 | N | N |
| DTXSID9024930 | 3,4-Diaminotoluene                         | 496-72-0   | ph2 | 200 | 10 | N | N |
| DTXSID7040788 | 2-tert-Butyl-4-methoxyphenol               | 121-00-6   | ph2 | 200 | 17 | N | N |
| DTXSID6022187 | 2,3,6-Trimethylphenol                      | 2416-94-6  | ph2 | 200 | 3  | N | N |
| DTXSID9026974 | 2,4-Di-tert-pentylphenol                   | 120-95-6   | ph2 | 200 | 64 | Y | N |
| DTXSID4020402 | 2,4-Diaminotoluene                         | 95-80-7    | ph2 | 200 | -6 | N | N |
| DTXSID2020921 | 2-Naphthylamine                            | 91-59-8    | ph2 | 200 | 13 | N | N |
| DTXSID3025091 | 3,3'-Dimethoxybenzidine                    | 119-90-4   | ph2 | 200 | 4  | N | N |
| DTXSID6027218 | 2,6-Diethylaniline                         | 579-66-8   | ph2 | 200 | 12 | N | N |
| DTXSID0047456 | 2-Norbornene-5,6-dicarboxylic anhydride    | 826-62-0   | ph2 | 200 | 7  | N | N |
| DTXSID1020485 | 3,3'-Dimethoxybenzidine dihydrochloride    | 20325-40-0 | ph2 | 200 | 3  | N | N |
| DTXSID1020069 | 2-Amino-5-azotoluene                       | 97-56-3    | ph2 | 200 | 29 | N | N |
| DTXSID7022049 | 2,4,6-Trimethylphenol                      | 527-60-6   | ph2 | 200 | 9  | N | N |
| DTXSID1044564 | 2,6,10-Trimethyl-2,6,10-triazaundecane     | 3855-32-1  | ph2 | 200 | -8 | N | N |
| DTXSID9047592 | 9-Phenanthrol                              | 484-17-3   | ph2 | 200 | 30 | N | N |
| DTXSID3040722 | 4-Cyclohexylcyclohexanol                   | 2433-14-9  | ph2 | 200 | 15 | N | N |
| DTXSID1026665 | 3-Pyridinecarbonitrile                     | 100-54-9   | ph2 | 200 | 0  | N | N |
| DTXSID5024394 | Acetic acid                                | 64-19-7    | ph2 | 200 | 3  | N | N |
| DTXSID9022312 | 4-Octylphenol                              | 1806-26-4  | ph2 | 200 | 71 | Y | N |
| DTXSID0020604 | 4-Vinyl-1-cyclohexene dioxide              | 106-87-6   | ph2 | 200 | 1  | N | N |
| DTXSID8040721 | 4-Cyclohexylcyclohexanone                  | 92-68-2    | ph2 | 200 | 5  | N | N |
| DTXSID9033058 | 4-Amino-1,2,4-triazole                     | 584-13-4   | ph2 | 200 | 14 | N | N |
| DTXSID1020699 | 4-Hexylresorcinol                          | 136-77-6   | ph2 | 200 | 25 | N | N |
| DTXSID0021834 | 4-Nitrophenol                              | 100-02-7   | ph2 | 200 | -1 | N | N |

|               |                                        |             |     |     |    |   |   |
|---------------|----------------------------------------|-------------|-----|-----|----|---|---|
| DTXSID1026792 | 3-Methylaniline                        | 108-44-1    | ph2 | 200 | 6  | N | N |
| DTXSID7020005 | Acetamide                              | 60-35-5     | ph2 | 200 | 2  | N | N |
| DTXSID5021831 | 3-Nitrotoluene                         | 99-08-1     | ph2 | 200 | 0  | N | N |
| DTXSID1046970 | 5HPP-33                                | 105624-86-0 | ph2 | 200 | 18 | N | N |
| DTXSID5029055 | 4-Nonylphenol, branched                | 84852-15-3  | ph2 | 200 | 71 | Y | N |
| DTXSID6023652 | 6-Thioguanine                          | 154-42-7    | ph2 | 200 | 3  | N | N |
| DTXSID9047540 | 3-Hydroxyfluorene                      | 6344-67-8   | ph2 | 200 | -1 | N | N |
| DTXSID9025453 | 3-Methylbutyl acetate                  | 123-92-2    | ph2 | 200 | 2  | N | N |
| DTXSID8020961 | 4-Nitroaniline                         | 100-01-6    | ph2 | 200 | 7  | N | N |
| DTXSID9022360 | 4-(1,1,3,3-Tetramethylbutyl)phenol     | 140-66-9    | ph2 | 200 | 61 | Y | N |
| DTXSID9020295 | 4-Chloroaniline                        | 106-47-8    | ph2 | 203 | 2  | N | N |
| DTXSID0040707 | 4-Pentylaniline                        | 33228-44-3  | ph2 | 200 | 6  | N | N |
| DTXSID3037094 | 4-Hydroxytamoxifen                     | 68392-35-8  | ph2 | 50  | 3  | Y | N |
| DTXSID9024489 | 5-Amino-2-methylphenol                 | 2835-95-2   | ph2 | 200 | 9  | N | N |
| DTXSID1044697 | 4-Ethyl-1-yn-3-ol                      | 5877-42-9   | ph2 | 200 | -3 | N | N |
| DTXSID2027593 | 4-Chlorobenzotrichloride               | 5216-25-1   | ph2 | 200 | 9  | N | N |
| DTXSID1020510 | 7,12-Dimethylbenz(a)anthracene         | 57-97-6     | ph2 | 200 | 1  | N | N |
| DTXSID4034287 | 5-Heptyldihydro-2(3H)-furanone         | 104-67-6    | ph2 | 200 | 2  | N | N |
| DTXSID4021717 | 4-Chloro-3-methylphenol                | 59-50-7     | ph2 | 200 | 0  | N | N |
| DTXSID5020730 | 8-Hydroxyquinoline                     | 148-24-3    | ph2 | 200 | -4 | N | N |
| DTXSID3022588 | 4-Aminofolic acid                      | 54-62-6     | ph2 | 200 | -4 | N | N |
| DTXSID0021969 | 4-Hydroxy-3-methoxybenzaldehyde        | 121-33-5    | ph2 | 200 | 0  | N | N |
| DTXSID5020869 | 4,4'-Methylenebis(N,N-dimethylaniline) | 101-61-1    | ph2 | 200 | 1  | N | N |
| DTXSID2037712 | 4,4',4''-Ethane-1,1,1-triyltriphenol   | 27955-94-8  | ph2 | 200 | 6  | N | N |
| DTXSID6022422 | 4,4'-Diaminobiphenyl methane           | 101-77-9    | ph2 | 200 | 1  | N | N |
| DTXSID6024460 | 4-Aminoazobenzene                      | 60-09-3     | ph2 | 200 | 3  | N | N |
| DTXSID3020887 | 6-Methylquinoline                      | 91-62-3     | ph2 | 200 | -7 | N | N |
| DTXSID8024523 | 4-Androstene-3,17-dione                | 63-05-8     | ph2 | 0.2 | 0  | N | N |
| DTXSID3023845 | Acenaphthylene                         | 208-96-8    | ph2 | 200 | 8  | N | N |
| DTXSID1020221 | 4-tert-Butylphenol                     | 98-54-4     | ph2 | 200 | 0  | N | N |

|               |                                            |            |     |     |    |   |   |
|---------------|--------------------------------------------|------------|-----|-----|----|---|---|
| DTXSID2020006 | Acetaminophen                              | 103-90-2   | ph2 | 200 | -4 | N | N |
| DTXSID2020634 | 5-Fluorouracil                             | 51-21-8    | ph2 | 204 | -4 | N | N |
| DTXSID8020541 | 5,5-Diphenylhydantoin                      | 57-41-0    | ph2 | 200 | 2  | N | N |
| DTXSID3047558 | 6:2 Fluorotelomer methacrylate             | 2144-53-8  | ph2 | 200 | -3 | N | N |
| DTXSID5044572 | 6:2 Fluorotelomer alcohol                  | 647-42-7   | ph2 | 200 | -7 | N | N |
| DTXSID2037714 | 4-Heptylphenol                             | 1987-50-4  | ph2 | 200 | 55 | Y | N |
| DTXSID9022364 | 5alpha-Dihydrotestosterone                 | 521-18-6   | ph2 | 200 | -5 | N | N |
| DTXSID5020867 | 4,4'-Diamino-3,3'-dimethyldiphenylmethane  | 838-88-0   | ph2 | 200 | 3  | N | N |
| DTXSID0021094 | 4,4'-Oxydianiline                          | 101-80-4   | ph2 | 200 | 3  | N | N |
| DTXSID3020966 | 4-Nitrobenzoic acid                        | 62-23-7    | ph2 | 200 | 1  | N | N |
| DTXSID5021209 | 6-Propyl-2-thiouracil                      | 51-52-5    | ph2 | 200 | 0  | N | N |
| DTXSID3021774 | Acenaphthene                               | 83-32-9    | ph2 | 200 | 7  | N | N |
| DTXSID6024466 | 4-Aminobenzoic acid                        | 150-13-0   | ph2 | 200 | -4 | N | N |
| DTXSID7029904 | 8:2 Fluorotelomer alcohol                  | 678-39-7   | ph2 | 200 | -2 | N | N |
| DTXSID5023792 | 4-Nitrotoluene                             | 99-99-0    | ph2 | 200 | 4  | N | N |
| DTXSID7022332 | 4-(Butan-2-yl)phenol                       | 99-71-8    | ph2 | 200 | 0  | N | N |
| DTXSID9047598 | 4,4'-Sulfonylbis[2-(prop-2-en-1-yl)phenol] | 41481-66-7 | ph2 | 200 | 11 | N | N |
| DTXSID2020890 | 6-Methyl-2-thiouracil                      | 56-04-2    | ph2 | 200 | 4  | N | N |
| DTXSID8021771 | 4-(2-Methylbutan-2-yl)phenol               | 80-46-6    | ph2 | 200 | 14 | N | N |
| DTXSID5020283 | 4-Chloro-1,2-diaminobenzene                | 95-83-0    | ph2 | 200 | 4  | N | N |
| DTXSID9040716 | 4-(2-Methylbutan-2-yl)cyclohexanol         | 5349-51-9  | ph2 | 200 | 6  | N | N |
| DTXSID2026781 | 4-Methyl-2-pentanol                        | 108-11-2   | ph2 | 200 | -8 | N | N |
| DTXSID9034286 | 5-Chloro-2-methyl-3(2H)-isothiazolone      | 26172-55-4 | ph2 | 200 | 3  | N | N |
| DTXSID1038321 | 3-Phenoxybenzoic acid                      | 3739-38-6  | ph2 | 200 | 8  | N | N |
| DTXSID6020224 | 4-Butyrolactone                            | 96-48-0    | ph2 | 200 | 9  | N | N |
| DTXSID3022536 | 4-Cumylphenol                              | 599-64-4   | ph2 | 0.2 | 1  | N | N |
| DTXSID2027200 | 4,4'-Bipyridine                            | 553-26-4   | ph2 | 200 | 8  | N | N |
| DTXSID5021754 | 5,5-Dimethylhydantoin                      | 77-71-4    | ph2 | 201 | 5  | N | N |

|               |                                              |             |     |              |    |   |   |
|---------------|----------------------------------------------|-------------|-----|--------------|----|---|---|
| DTXSID1047526 | C10-21 sulfonic acids phenyl esters          | 91082-17-6  | ph2 | 200<br>µg/ml | 2  | N | N |
| DTXSID2026446 | Acetyl tributyl citrate                      | 77-90-7     | ph2 | 200          | 0  | N | N |
| DTXSID9020249 | Carbofuran                                   | 1563-66-2   | ph2 | 200          | -2 | N | N |
| DTXSID0047377 | AVE6324                                      | NOCAS_47377 | ph2 | 189          | 38 | Y | N |
| DTXSID7027047 | alpha-Isomethylionone                        | 127-51-5    | ph2 | 200          | 10 | N | N |
| DTXSID6022472 | Butylbenzene                                 | 104-51-8    | ph2 | 200          | 4  | N | N |
| DTXSID4020240 | Caprolactam                                  | 105-60-2    | ph2 | 200          | 8  | N | N |
| DTXSID9022817 | Carminic acid                                | 1260-17-9   | ph2 | 200          | 5  | N | N |
| DTXSID6021828 | Acetophenone                                 | 98-86-2     | ph2 | 200          | 17 | N | N |
| DTXSID6047527 | Adipic acid, polypropyleneglycol,<br>laurate | 66456-53-9  | ph2 | 200<br>µg/ml | 4  | N | N |
| DTXSID7025055 | Bis(2-ethylhexyl) decanedioate               | 122-62-3    | ph2 | 200          | 8  | N | N |
| DTXSID9027360 | Ammonium carbamate                           | 1111-78-0   | ph2 | 200          | -5 | N | N |
| DTXSID6020143 | Benzoic acid                                 | 65-85-0     | ph2 | 205          | 7  | N | N |
| DTXSID3020205 | Benzyl butyl phthalate                       | 85-68-7     | ph2 | 200          | 5  | N | N |
| DTXSID8020040 | Aldrin                                       | 309-00-2    | ph2 | 200          | 25 | N | N |
| DTXSID7024538 | Anthralin                                    | 1143-38-0   | ph2 | 200          | 5  | N | N |
| DTXSID4047381 | AVE8923                                      | NOCAS_47381 | ph2 | 18           | 0  | N | N |
| DTXSID4020161 | Biphenyl                                     | 92-52-4     | ph2 | 200          | 3  | N | N |
| DTXSID6047319 | Carabersat                                   | 184653-84-7 | ph2 | 195          | 0  | N | N |
| DTXSID0047375 | AVE9423                                      | 862243-29-6 | ph2 | 200          | 0  | N | N |
| DTXSID4024436 | Allura Red C.I.16035                         | 25956-17-6  | ph2 | 200          | 11 | Y | N |
| DTXSID3026697 | Bis(2-ethylhexyl) nonanedioate               | 103-24-2    | ph2 | 200          | -6 | N | N |
| DTXSID3047344 | Cariporide mesylate                          | 159138-81-5 | ph2 | 149          | -1 | N | N |
| DTXSID5023902 | Benz(a)anthracene                            | 56-55-3     | ph2 | 200          | 10 | N | N |
| DTXSID4022731 | Carbamazepine                                | 298-46-4    | ph2 | 200          | 2  | N | N |
| DTXSID4022442 | Bisphenol B                                  | 77-40-7     | ph2 | 200          | 13 | N | N |
| DTXSID5023950 | Carbosulfan                                  | 55285-14-8  | ph2 | 200          | 9  | N | N |
| DTXSID9020168 | Bis(2-chloroethyl) ether                     | 111-44-4    | ph2 | 200          | 1  | N | N |
| DTXSID8040694 | Butyl benzoate                               | 136-60-7    | ph2 | 200          | 2  | N | N |

|               |                                 |             |     |     |    |   |   |
|---------------|---------------------------------|-------------|-----|-----|----|---|---|
| DTXSID8037708 | Ammonium perfluorooctanoate     | 3825-26-1   | ph2 | 200 | -2 | N | N |
| DTXSID1020148 | Benzotrichloride                | 98-07-7     | ph2 | 200 | -3 | N | N |
| DTXSID0047371 | AVE5638                         | 725228-45-5 | ph2 | 200 | 18 | N | N |
| DTXSID9024431 | Aldicarb oxime                  | 1646-75-9   | ph2 | 200 | 8  | N | N |
| DTXSID7041623 | Benodanil                       | 15310-01-7  | ph2 | 200 | -2 | N | N |
| DTXSID0020606 | Bis(2-ethylhexyl)hexanedioate   | 103-23-1    | ph2 | 200 | 11 | N | N |
| DTXSID5047376 | AVE2865                         | 648917-13-9 | ph2 | 100 | 4  | N | N |
| DTXSID4020119 | Azathioprine                    | 446-86-6    | ph2 | 199 | -1 | N | N |
| DTXSID7030698 | alpha-Cyclodextrin              | 10016-20-3  | ph2 | 105 | -4 | N | N |
| DTXSID8020123 | Azobenzene                      | 103-33-3    | ph2 | 200 | 7  | N | N |
| DTXSID0023878 | Anthracene                      | 120-12-7    | ph2 | 200 | 3  | N | N |
| DTXSID0020232 | Caffeine                        | 58-08-2     | ph2 | 200 | 1  | N | N |
| DTXSID1047528 | Benzylloctyl adipate            | 58394-64-2  | ph2 | 200 | 9  | N | N |
| DTXSID6025014 | Benzal chloride                 | 98-87-3     | ph2 | 200 | 5  | N | N |
| DTXSID5044576 | Acetyltriethyl citrate          | 77-89-4     | ph2 | 200 | -5 | N | N |
| DTXSID5020152 | Benzyl alcohol                  | 100-51-6    | ph2 | 200 | 2  | N | N |
| DTXSID4024729 | Carbendazim                     | 10605-21-7  | ph2 | 200 | -4 | N | N |
| DTXSID8021515 | Butanoic acid                   | 107-92-6    | ph2 | 200 | 4  | N | N |
| DTXSID0023907 | Benzo(b)fluoranthene            | 205-99-2    | ph2 | 200 | 13 | N | N |
| DTXSID7021239 | all-trans-Retinoic acid         | 302-79-4    | ph2 | 200 | 6  | N | N |
| DTXSID7027625 | Bis(2-ethylhexyl) terephthalate | 6422-86-2   | ph2 | 100 | -8 | N | N |
| DTXSID5020027 | Acrylamide                      | 79-06-1     | ph2 | 200 | 0  | N | N |
| DTXSID4021135 | C.I. Solvent Yellow 14          | 842-07-9    | ph2 | 200 | 2  | N | N |
| DTXSID8024652 | Bronopol                        | 52-51-7     | ph2 | 200 | 7  | N | N |
| DTXSID3020257 | Catechol                        | 120-80-9    | ph2 | 200 | 0  | N | N |
| DTXSID5020108 | Aspirin                         | 50-78-2     | ph2 | 200 | -8 | N | N |
| DTXSID0047535 | Butyryl trihexyl citrate        | 82469-79-2  | ph2 | 200 | 0  | N | N |
| DTXSID5041691 | Butam                           | 35256-85-0  | ph2 | 200 | 6  | N | N |
| DTXSID7037717 | Bisphenol AF                    | 1478-61-1   | ph2 | 200 | 26 | N | N |
| DTXSID5047372 | AVE3295                         | 478263-98-8 | ph2 | 200 | -4 | N | N |
| DTXSID6047286 | Candoxatril                     | 123122-55-4 | ph2 | 200 | -2 | N | N |

|               |                            |             |     |     |    |   |   |
|---------------|----------------------------|-------------|-----|-----|----|---|---|
| DTXSID7020685 | beta-Hexachlorocyclohexane | 319-85-7    | ph2 | 200 | 5  | N | N |
| DTXSID4047383 | AVE3247                    | NOCAS_47383 | ph2 | 48  | 8  | N | N |
| DTXSID0021961 | Benzophenone               | 119-61-9    | ph2 | 200 | 1  | N | N |
| DTXSID2047270 | Besoprodil                 | 253450-09-8 | ph2 | 200 | 2  | N | N |
| DTXSID3020209 | Butylparaben               | 94-26-8     | ph2 | 200 | 5  | N | N |
| DTXSID2020137 | Benzidine                  | 92-87-5     | ph2 | 200 | 2  | N | N |
| DTXSID3020910 | Busulfan                   | 55-98-1     | ph2 | 200 | 7  | N | N |
| DTXSID2047303 | CJ-013790                  | 179465-71-5 | ph2 | 100 | -3 | N | N |
| DTXSID4047254 | CP-457920                  | 220860-50-4 | ph2 | 200 | 6  | N | N |
| DTXSID4020371 | Dapsone                    | 80-08-0     | ph2 | 200 | 4  | N | N |
| DTXSID8020337 | Clomiphene citrate (1:1)   | 50-41-9     | ph2 | 200 | 22 | Y | N |
| DTXSID9021554 | Decanoic acid              | 334-48-5    | ph2 | 209 | 10 | N | N |
| DTXSID6024917 | Diacetone alcohol          | 123-42-2    | ph2 | 200 | 8  | N | N |
| DTXSID5047297 | CP-085958                  | 134002-60-1 | ph2 | 100 | 16 | N | N |
| DTXSID0024000 | Chlorthal-dimethyl         | 1861-32-1   | ph2 | 200 | 12 | N | N |
| DTXSID3047265 | CP-471358                  | NOCAS_47265 | ph2 | 200 | 6  | N | N |
| DTXSID0047248 | CI-1018                    | NOCAS_47248 | ph2 | 200 | 14 | N | N |
| DTXSID3047267 | CP-642931                  | NOCAS_47267 | ph2 | 100 | 0  | N | N |
| DTXSID5048182 | Cyclohexylphenylketone     | 712-50-5    | ph2 | 200 | 6  | N | N |
| DTXSID9047253 | CP-401387                  | 199171-88-5 | ph2 | 100 | 5  | N | N |
| DTXSID0047246 | Darbufelone mesylate       | 139340-56-0 | ph2 | 100 | 12 | N | N |
| DTXSID7020348 | Coumarin                   | 91-64-5     | ph2 | 200 | 1  | N | N |
| DTXSID6024882 | Cycloheximide              | 66-81-9     | ph2 | 200 | 1  | N | N |
| DTXSID9047251 | CP-122721                  | 145742-28-5 | ph2 | 200 | 11 | N | N |
| DTXSID3020332 | Citric acid                | 77-92-9     | ph2 | 200 | -2 | N | N |
| DTXSID7047306 | CP-634384                  | 290352-28-2 | ph2 | 200 | 16 | N | N |
| DTXSID0047294 | CP-863187                  | 668981-02-0 | ph2 | 200 | -1 | N | N |
| DTXSID7047304 | CP-100829                  | 135080-03-4 | ph2 | 100 | 19 | N | N |
| DTXSID2047274 | CP-114271                  | 113734-18-2 | ph2 | 200 | 0  | N | N |
| DTXSID1023996 | Cyclohexylamine            | 108-91-8    | ph2 | 200 | 0  | N | N |
| DTXSID8047262 | CI-1029                    | 207736-05-8 | ph2 | 190 | 11 | N | N |



|               |                                 |             |     |     |    |   |   |
|---------------|---------------------------------|-------------|-----|-----|----|---|---|
| DTXSID1047283 | CP-728663                       | 368832-42-2 | ph2 | 200 | -1 | N | N |
| DTXSID7024827 | Chlorpromazine hydrochloride    | 69-09-0     | ph2 | 200 | 8  | N | N |
| DTXSID2047305 | CP-608039                       | NOCAS_47305 | ph2 | 200 | 3  | N | N |
| DTXSID2021575 | Dalapon                         | 75-99-0     | ph2 | 200 | 0  | N | N |
| DTXSID6047280 | CP-607366                       | 289716-94-5 | ph2 | 200 | 2  | N | N |
| DTXSID7024873 | Cyanuric acid                   | 108-80-5    | ph2 | 199 | -1 | N | N |
| DTXSID8022828 | Cladribine                      | 4291-63-8   | ph2 | 200 | 2  | N | N |
| DTXSID8047264 | CP-283097                       | 171866-31-2 | ph2 | 100 | 9  | N | N |
| DTXSID5024891 | Cytarabine hydrochloride        | 69-74-9     | ph2 | 200 | 0  | N | N |
| DTXSID6043709 | Cyclopamine                     | 4449-51-8   | ph2 | 200 | 1  | N | N |
| DTXSID1047281 | CP-612372                       | 353280-07-6 | ph2 | 200 | -1 | N | N |
| DTXSID7047279 | CP-532623                       | 261947-38-0 | ph2 | 200 | -4 | N | N |
| DTXSID6024888 | Cyclophosphamide monohydrate    | 6055-19-2   | ph2 | 200 | 3  | N | N |
| DTXSID4021894 | Cyclohexanol                    | 108-93-0    | ph2 | 200 | -6 | N | N |
| DTXSID9047255 | CP-465394                       | NOCAS_47255 | ph2 | 100 | -1 | N | N |
| DTXSID2020262 | Chloramben                      | 133-90-4    | ph2 | 200 | -2 | N | N |
| DTXSID3020336 | Clofibrate                      | 637-07-0    | ph2 | 200 | -4 | N | N |
| DTXSID5020366 | Cyproterone acetate             | 427-51-0    | ph2 | 200 | 8  | N | N |
| DTXSID2047278 | CP-457677                       | 214535-77-0 | ph2 | 200 | -3 | N | N |
| DTXSID6047282 | CP-671305                       | 445295-04-5 | ph2 | 200 | -3 | N | N |
| DTXSID5047291 | CI-1044                         | NOCAS_47291 | ph2 | 200 | 4  | N | N |
| DTXSID8047266 | CP-544439                       | 230954-09-3 | ph2 | 200 | -4 | N | N |
| DTXSID2047301 | CP-456773                       | 210826-40-7 | ph2 | 200 | -1 | N | N |
| DTXSID7020267 | Chlordane                       | 57-74-9     | ph2 | 200 | 24 | N | N |
| DTXSID7047308 | CP-105696                       | 158081-99-3 | ph2 | 100 | 19 | N | N |
| DTXSID9020299 | Chlorobenzilate                 | 510-15-6    | ph2 | 200 | 10 | N | N |
| DTXSID1047576 | Cotinine                        | 486-56-6    | ph2 | 200 | -3 | N | N |
| DTXSID8047268 | CI-959                          | 104795-68-8 | ph2 | 200 | 1  | N | N |
| DTXSID6027921 | Di(propylene glycol) dibenzoate | 27138-31-4  | ph2 | 200 | 2  | N | N |
| DTXSID4020458 | Chlorpyrifos                    | 2921-88-2   | ph2 | 200 | 7  | N | N |
| DTXSID0021464 | Ziram                           | 137-30-4    | ph2 | 200 | 1  | N | N |

|               |                                     |             |     |              |     |   |   |
|---------------|-------------------------------------|-------------|-----|--------------|-----|---|---|
| DTXSID2047272 | CJ-013610                           | 249296-43-3 | ph2 | 200          | -4  | N | N |
| DTXSID7029871 | Clotrimazole                        | 23593-75-1  | ph2 | 200          | 6   | N | N |
| DTXSID6020359 | Cyclohexanone                       | 108-94-1    | ph2 | 200          | -1  | N | N |
| DTXSID3047429 | Dexamethasone sodium phosphate      | 2392-39-4   | ph2 | 200          | 2   | N | N |
| DTXSID8044175 | Clove leaf oil                      | 8000-34-8   | ph2 | 200<br>µg/ml | 9   | N | N |
| DTXSID5024845 | Colchicine                          | 64-86-8     | ph2 | 200          | -3  | N | N |
| DTXSID5047299 | CP-422935                           | NOCAS_47299 | ph2 | 200          | 0   | N | N |
| DTXSID2047276 | CP-409092                           | 194098-25-4 | ph2 | 200          | 2   | N | N |
| DTXSID3024869 | Cumene hydroperoxide                | 80-15-9     | ph2 | 200          | 0   | N | N |
| DTXSID0022777 | Celecoxib                           | 169590-42-5 | ph2 | 200          | 21  | N | N |
| DTXSID3026726 | Citronellol                         | 106-22-9    | ph2 | 200          | 1   | N | N |
| DTXSID6022474 | Corticosterone                      | 50-22-6     | ph2 | 200          | 2   | N | N |
| DTXSID2020268 | Chlorendic acid                     | 115-28-6    | ph2 | 200          | 4   | N | N |
| DTXSID9022310 | Daidzein                            | 486-66-8    | ph2 | 200          | 7   | N | N |
| DTXSID6040111 | Ethyl butyrate                      | 105-54-4    | ph2 | 200          | -11 | N | N |
| DTXSID1025017 | Dicumyl peroxide                    | 80-43-3     | ph2 | 200          | 29  | N | N |
| DTXSID7020392 | Diallyl phthalate                   | 131-17-9    | ph2 | 200          | 22  | N | N |
| DTXSID8020462 | Diethylene glycol                   | 111-46-6    | ph2 | 200          | 10  | N | N |
| DTXSID7024081 | Endothal                            | 145-73-3    | ph2 | 200          | 20  | N | N |
| DTXSID9020582 | Ethoxyquin                          | 91-53-2     | ph2 | 200          | 29  | N | N |
| DTXSID4020537 | Diphenhydramine hydrochloride       | 147-24-0    | ph2 | 200          | 19  | N | N |
| DTXSID5024051 | Diisopropyl methylphosphonate       | 1445-75-6   | ph2 | 200          | 3   | N | N |
| DTXSID2020505 | Dimethylaminoethanol                | 108-01-0    | ph2 | 200          | 14  | N | N |
| DTXSID7021780 | Diethyl phthalate                   | 84-66-2     | ph2 | 200          | 14  | N | N |
| DTXSID6022000 | Ethanolamine                        | 141-43-5    | ph2 | 200          | 7   | N | N |
| DTXSID5025152 | Dimethyl succinate                  | 106-65-0    | ph2 | 200          | 10  | N | N |
| DTXSID4047258 | Enadoline                           | 124378-77-4 | ph2 | 200          | 3   | N | N |
| DTXSID0027983 | Dipropylene glycol monomethyl ether | 34590-94-8  | ph2 | 200          | 4   | N | N |
| DTXSID6020561 | Endrin                              | 72-20-8     | ph2 | 200          | 11  | N | N |
| DTXSID8025096 | Dimethyl adipate                    | 627-93-0    | ph2 | 200          | 19  | N | N |

|               |                                               |             |     |     |    |   |   |
|---------------|-----------------------------------------------|-------------|-----|-----|----|---|---|
| DTXSID2021993 | Dibenzofuran                                  | 132-64-9    | ph2 | 200 | 10 | N | N |
| DTXSID8022959 | Docusate sodium                               | 577-11-7    | ph2 | 200 | 94 | Y | N |
| DTXSID5024055 | Dimethyl sulfate                              | 77-78-1     | ph2 | 200 | 11 | N | N |
| DTXSID6020480 | Dimethoxane                                   | 828-00-2    | ph2 | 200 | 0  | N | N |
| DTXSID9022528 | Ethylparaben                                  | 120-47-8    | ph2 | 200 | 14 | N | N |
| DTXSID4020375 | Dichlorodiphenyltrichloroethane               | 50-29-3     | ph2 | 200 | 23 | Y | N |
| DTXSID3021932 | Diethanolamine                                | 111-42-2    | ph2 | 200 | 0  | N | N |
| DTXSID4047628 | Dicyclohexyl disulfide                        | 2550-40-5   | ph2 | 200 | 24 | N | N |
| DTXSID5027932 | Dodecylbenzene sulfonate triethanolamine(1:1) | 27323-41-7  | ph2 | 180 | 57 | Y | N |
| DTXSID1041847 | Dibutyl decanedioate                          | 109-43-3    | ph2 | 200 | 4  | N | N |
| DTXSID3020207 | Dinoseb                                       | 88-85-7     | ph2 | 200 | 8  | N | N |
| DTXSID1024621 | Diethylene glycol dimethyl ether              | 111-96-6    | ph2 | 200 | -2 | N | N |
| DTXSID1023235 | D-Mannitol                                    | 69-65-8     | ph2 | 200 | 5  | N | N |
| DTXSID9020453 | Dieldrin                                      | 60-57-1     | ph2 | 200 | 20 | N | N |
| DTXSID8020597 | Ethylene glycol                               | 107-21-1    | ph2 | 201 | 5  | N | N |
| DTXSID6025068 | Dihexyl phthalate                             | 84-75-3     | ph2 | 200 | 19 | N | N |
| DTXSID7047277 | Elzasonan                                     | 361343-19-3 | ph2 | 200 | 7  | N | N |
| DTXSID6048175 | Difpas-pyrazole                               | 151506-44-4 | ph2 | 200 | 0  | N | N |
| DTXSID9022522 | Diisobutyl phthalate                          | 84-69-5     | ph2 | 200 | 12 | N | N |
| DTXSID3024940 | Dibromoacetonitrile                           | 3252-43-5   | ph2 | 200 | -4 | N | N |
| DTXSID8047395 | Diisononyl cyclohexane-1,2-dicarboxylate      | 166412-78-8 | ph2 | 200 | 10 | N | N |
| DTXSID1024045 | Diethyl sulfate                               | 64-67-5     | ph2 | 200 | 3  | N | N |
| DTXSID1021956 | Di-n-octyl phthalate                          | 117-84-0    | ph2 | 200 | 1  | N | N |
| DTXSID0027856 | Dipropylene glycol                            | 25265-71-8  | ph2 | 200 | -5 | N | N |
| DTXSID1020512 | Dimethylcarbamoyl chloride                    | 79-44-7     | ph2 | 200 | -3 | N | N |
| DTXSID1040112 | Ethyl heptanoate                              | 106-30-9    | ph2 | 200 | 2  | N | N |
| DTXSID9036690 | Diisobutyl adipate                            | 141-04-8    | ph2 | 200 | 3  | N | N |
| DTXSID0026967 | Diethylene glycol dibenzoate                  | 120-55-8    | ph2 | 200 | 8  | N | N |
| DTXSID4029145 | Dimethyl malonate                             | 108-59-8    | ph2 | 200 | 8  | N | N |

|               |                                    |             |     |              |    |   |   |
|---------------|------------------------------------|-------------|-----|--------------|----|---|---|
| DTXSID0024052 | Dimethipin                         | 55290-64-7  | ph2 | 200          | -4 | N | N |
| DTXSID2024955 | Di-tert-butyl peroxide             | 110-05-4    | ph2 | 105          | -1 | N | N |
| DTXSID6027923 | Dodecylbenzenesulfonic acid        | 27176-87-0  | ph2 | 200          | 88 | Y | N |
| DTXSID3025122 | Dimethyl glutarate                 | 1119-40-0   | ph2 | 200          | 2  | N | N |
| DTXSID2038732 | Diethyl butanedioate               | 123-25-1    | ph2 | 200          | -1 | N | N |
| DTXSID0047537 | Diethyl sebacate                   | 2432-87-3   | ph2 | 200          | 10 | N | N |
| DTXSID2021866 | Dibutyl adipate                    | 105-99-7    | ph2 | 200          | 3  | N | N |
| DTXSID8037752 | Diphenyl isophthalate              | 744-45-6    | ph2 | 100          | 7  | N | N |
| DTXSID7022174 | EPN                                | 2104-64-5   | ph2 | 200          | 0  | N | N |
| DTXSID4022367 | Estrone                            | 53-16-7     | ph2 | 0.2          | 0  | N | N |
| DTXSID0020498 | Dimethyl terephthalate             | 120-61-6    | ph2 | 200          | 1  | N | N |
| DTXSID9032537 | Didecyldimethylammonium chloride   | 7173-51-5   | ph2 | 200          | 56 | Y | N |
| DTXSID1021322 | Disulfiram                         | 97-77-8     | ph2 | 200          | -2 | N | N |
| DTXSID3037208 | Diclofenac sodium                  | 15307-79-6  | ph2 | 200          | 12 | N | N |
| DTXSID4022991 | Erythromycin                       | 114-07-8    | ph2 | 50           | 5  | N | N |
| DTXSID2020428 | Dichloroacetic acid                | 79-43-6     | ph2 | 200          | -5 | N | N |
| DTXSID1027924 | Diisodecyl hexanedioate            | 27178-16-1  | ph2 | 200          | 5  | N | N |
| DTXSID7026994 | Dodecylbenzene                     | 123-01-3    | ph2 | 200          | -1 | N | N |
| DTXSID3020465 | Diethylstilbestrol                 | 56-53-1     | ph2 | 0.2          | 14 | N | N |
| DTXSID1026900 | Dodecyltrimethylammonium chloride  | 112-00-5    | ph2 | 200          | 3  | Y | N |
| DTXSID2024086 | Ethion                             | 563-12-2    | ph2 | 200          | 8  | N | N |
| DTXSID5031131 | Dipentyl phthalate                 | 131-18-0    | ph2 | 200          | 19 | N | N |
| DTXSID3025049 | Diethylene glycol monomethyl ether | 111-77-3    | ph2 | 200          | 8  | N | N |
| DTXSID3047394 | Grinstad Soft-N-Safe               | NOCAS_47394 | ph2 | 200<br>µg/ml | 13 | N | N |
| DTXSID9020663 | Glycerol                           | 56-81-5     | ph2 | 200          | 10 | N | N |
| DTXSID6025486 | Isoproterenol hydrochloride        | 51-30-9     | ph2 | 200          | 14 | N | N |
| DTXSID5020863 | Methyl dopa sesquihydrate          | 41372-08-1  | ph2 | 200          | 1  | N | N |
| DTXSID7020716 | Hydroquinone                       | 123-31-9    | ph2 | 200          | 16 | N | N |
| DTXSID1048174 | FR167356                           | 174185-16-1 | ph2 | 200          | 31 | Y | N |
| DTXSID5020653 | Gentian Violet                     | 548-62-9    | ph2 | 200          | 19 | Y | N |

|               |                                     |             |     |     |     |   |   |
|---------------|-------------------------------------|-------------|-----|-----|-----|---|---|
| DTXSID1024126 | Heptachlor epoxide B                | 1024-57-3   | ph2 | 200 | 24  | N | N |
| DTXSID7022413 | Isoeugenol                          | 97-54-1     | ph2 | 200 | 10  | N | N |
| DTXSID8020759 | Isophorone                          | 78-59-1     | ph2 | 200 | 4   | N | N |
| DTXSID2020713 | Hydrochlorothiazide                 | 58-93-5     | ph2 | 200 | 6   | N | N |
| DTXSID0023826 | Isophorone diisocyanate             | 4098-71-9   | ph2 | 200 | 5   | N | N |
| DTXSID2020688 | Hexachlorocyclopentadiene           | 77-47-4     | ph2 | 200 | 6   | N | N |
| DTXSID5047249 | Fandosentan potassium salt          | 221246-12-4 | ph2 | 100 | 12  | N | N |
| DTXSID5027982 | Hexanedioic acid, diisononyl ester  | 33703-08-1  | ph2 | 200 | 5   | N | N |
| DTXSID7047356 | Ilepatril                           | 473289-62-2 | ph2 | 200 | 13  | N | N |
| DTXSID8027955 | Isooctyl acrylate                   | 29590-42-9  | ph2 | 200 | 4   | Y | N |
| DTXSID3024104 | Fluoranthene                        | 206-44-0    | ph2 | 200 | 15  | N | N |
| DTXSID3025469 | Isopentyl alcohol                   | 123-51-3    | ph2 | 200 | 7   | N | N |
| DTXSID9032610 | Etofenprox                          | 80844-07-1  | ph2 | 200 | 4   | N | N |
| DTXSID7044928 | Isopropyl triethanolamine titanate  | 36673-16-2  | ph2 | 200 | 23  | N | N |
| DTXSID3020627 | Fluconazole                         | 86386-73-4  | ph2 | 200 | 3   | N | N |
| DTXSID8025337 | Formamide                           | 75-12-7     | ph2 | 200 | 5   | N | N |
| DTXSID1048170 | FR150011                            | 149413-74-1 | ph2 | 200 | 63  | Y | N |
| DTXSID1020770 | Kepone                              | 143-50-0    | ph2 | 200 | 56  | Y | N |
| DTXSID4022369 | Fulvestrant                         | 129453-61-8 | ph2 | 200 | 6   | N | N |
| DTXSID7021605 | Hexanedioic acid                    | 124-04-9    | ph2 | 200 | -10 | N | N |
| DTXSID7024112 | Fomesafen                           | 72178-02-0  | ph2 | 200 | 5   | N | N |
| DTXSID3020679 | Heptachlor                          | 76-44-8     | ph2 | 200 | 35  | N | N |
| DTXSID3032620 | Hexaflumuron                        | 86479-06-3  | ph2 | 200 | 5   | N | N |
| DTXSID9020617 | Eugenol                             | 97-53-0     | ph2 | 200 | 7   | N | N |
| DTXSID6025355 | Glutaraldehyde                      | 111-30-8    | ph2 | 200 | 48  | N | N |
| DTXSID2048167 | FR900409                            | 138472-01-2 | ph2 | 200 | -1  | N | N |
| DTXSID9047338 | HMR1426                             | 262376-75-0 | ph2 | 200 | 13  | N | N |
| DTXSID9020740 | Indomethacin                        | 53-86-1     | ph2 | 200 | 9   | N | N |
| DTXSID1044643 | Glycidyl trimethylammonium chloride | 3033-77-0   | ph2 | 200 | 0   | N | N |
| DTXSID6021456 | FD&C Yellow 6                       | 2783-94-0   | ph2 | 200 | 6   | N | N |
| DTXSID2021600 | Heptanoic acid                      | 111-14-8    | ph2 | 200 | -3  | N | N |

|               |                                         |             |     |     |     |   |   |
|---------------|-----------------------------------------|-------------|-----|-----|-----|---|---|
| DTXSID0047539 | Hexane-1,6-diyl dibenzoate              | 22915-73-7  | ph2 | 200 | 0   | N | N |
| DTXSID1047312 | GSK232420A                              | 864283-48-7 | ph2 | 200 | 7   | N | N |
| DTXSID3042059 | Isopentyl butyrate                      | 106-27-4    | ph2 | 200 | -9  | N | N |
| DTXSID7032004 | Flutamide                               | 13311-84-7  | ph2 | 200 | 7   | N | N |
| DTXSID8020755 | Isoniazid                               | 54-85-3     | ph2 | 200 | -11 | N | N |
| DTXSID0020654 | Geranyl acetate                         | 105-87-3    | ph2 | 200 | -5  | N | N |
| DTXSID8033562 | Hydroxyflutamide                        | 52806-53-8  | ph2 | 200 | -4  | N | N |
| DTXSID4020666 | Glycidol                                | 556-52-5    | ph2 | 200 | -5  | N | N |
| DTXSID6047313 | GW473178E methyl benzene sulphonic acid | 263553-33-9 | ph2 | 135 | -13 | N | N |
| DTXSID8024107 | Fluridone                               | 59756-60-4  | ph2 | 200 | 14  | N | N |
| DTXSID7021607 | Hexanoic acid                           | 142-62-1    | ph2 | 200 | 1   | N | N |
| DTXSID7048168 | Fabesetron hydrochloride                | 129299-90-7 | ph2 | 178 | 7   | N | N |
| DTXSID0022519 | Folic acid                              | 59-30-3     | ph2 | 200 | -4  | N | N |
| DTXSID1021455 | FD&C Yellow 5                           | 1934-21-0   | ph2 | 200 | -3  | N | N |
| DTXSID1048178 | FR130739                                | 136042-19-8 | ph2 | 200 | 13  | N | N |
| DTXSID2029874 | Fenofibrate                             | 49562-28-9  | ph2 | 200 | 0   | N | N |
| DTXSID6025438 | Hydroxyurea                             | 127-07-1    | ph2 | 200 | 5   | N | N |
| DTXSID0027195 | Hexadecane                              | 544-76-3    | ph2 | 200 | -12 | N | N |
| DTXSID7029879 | Ketoconazole                            | 65277-42-1  | ph2 | 200 | 21  | N | N |
| DTXSID3021936 | Hexanedinitrile                         | 111-69-3    | ph2 | 200 | -10 | N | N |
| DTXSID6040371 | Fenaminosulf                            | 140-56-7    | ph2 | 200 | 64  | Y | N |
| DTXSID4034150 | Haloperidol                             | 52-86-8     | ph2 | 200 | 6   | N | N |
| DTXSID5023825 | Indium arsenide                         | 1303-11-3   | ph2 | 200 | -1  | N | N |
| DTXSID8024105 | Fluorene                                | 86-73-7     | ph2 | 200 | 7   | N | N |
| DTXSID3048522 | HMR1171 trifluoroacetate (1:1)          | NOCAS_48522 | ph2 | 76  | 7   | N | N |
| DTXSID8026727 | Geraniol                                | 106-24-1    | ph2 | 200 | 6   | N | N |
| DTXSID8024157 | Isopropalin                             | 33820-53-0  | ph2 | 200 | 7   | N | N |
| DTXSID6048171 | FR145237                                | 146011-65-6 | ph2 | 177 | 10  | N | N |
| DTXSID2020189 | FD&C Blue No. 1                         | 3844-45-9   | ph2 | 200 | 29  | Y | N |
| DTXSID4047252 | Ingliforib                              | 186392-65-4 | ph2 | 200 | 19  | N | N |

|               |                              |             |     |     |    |   |   |
|---------------|------------------------------|-------------|-----|-----|----|---|---|
| DTXSID2036299 | N,N-Dimethyloctylamine       | 7378-99-6   | ph2 | 200 | 8  | N | N |
| DTXSID9027441 | Octabenzene                  | 1843-05-6   | ph2 | 200 | 0  | N | N |
| DTXSID9047334 | MK-968                       | NOCAS_47334 | ph2 | 200 | 9  | N | N |
| DTXSID6020856 | N-Methyl-2-pyrrolidone       | 872-50-4    | ph2 | 200 | 2  | N | N |
| DTXSID4047331 | MK-547                       | 331623-06-4 | ph2 | 200 | 9  | N | N |
| DTXSID5047328 | MK-274                       | NOCAS_47328 | ph2 | 200 | 40 | N | N |
| DTXSID8021800 | N,N-Diethylaniline           | 91-66-7     | ph2 | 200 | 3  | N | N |
| DTXSID7025895 | N-Phenyl-1,4-benzenediamine  | 101-54-2    | ph2 | 200 | 10 | N | N |
| DTXSID4022529 | Methylparaben                | 99-76-3     | ph2 | 200 | 3  | N | N |
| DTXSID6025567 | Methyl 2-aminobenzoate       | 134-20-3    | ph2 | 200 | -3 | N | N |
| DTXSID2021026 | N-Nitrosodibutylamine        | 924-16-3    | ph2 | 200 | 3  | N | N |
| DTXSID5020944 | Nitrofurazone                | 59-87-0     | ph2 | 200 | 62 | Y | N |
| DTXSID8020913 | Naphthalene                  | 91-20-3     | ph2 | 200 | -8 | N | N |
| DTXSID0021832 | N,N,4-Trimethylaniline       | 99-97-8     | ph2 | 200 | -6 | N | N |
| DTXSID2021028 | N-Nitrosodiethylamine        | 55-18-5     | ph2 | 200 | 7  | N | N |
| DTXSID3036496 | Levonorgestrel               | 797-63-7    | ph2 | 200 | -1 | N | N |
| DTXSID4020820 | Methimazole                  | 60-56-0     | ph2 | 200 | 0  | N | N |
| DTXSID3020964 | Nitrobenzene                 | 98-95-3     | ph2 | 200 | 8  | N | N |
| DTXSID7020895 | Mirex                        | 2385-85-5   | ph2 | 200 | 0  | N | N |
| DTXSID2020894 | Michler's ketone             | 90-94-8     | ph2 | 200 | 2  | N | N |
| DTXSID7042190 | N,N-Dimethyldecylamine oxide | 2605-79-0   | ph2 | 200 | -8 | N | N |
| DTXSID7020972 | Nitrofurantoin               | 67-20-9     | ph2 | 200 | 48 | N | N |
| DTXSID8023632 | L-Tartaric acid              | 87-69-4     | ph2 | 200 | 3  | N | N |
| DTXSID5020784 | Lovastatin                   | 75330-75-5  | ph2 | 200 | 0  | N | N |
| DTXSID0047327 | MK-578                       | 313994-79-5 | ph2 | 200 | -4 | N | N |
| DTXSID6025692 | Myrcene                      | 123-35-3    | ph2 | 200 | 2  | N | N |
| DTXSID5025659 | Methyl salicylate            | 119-36-8    | ph2 | 200 | -1 | N | N |
| DTXSID4047335 | MK-812                       | 851916-42-2 | ph2 | 150 | 0  | N | N |
| DTXSID2022381 | meso-Hexestrol               | 84-16-2     | ph2 | 0.2 | -1 | N | N |
| DTXSID0020311 | Monuron                      | 150-68-5    | ph2 | 200 | 10 | N | N |
| DTXSID6021030 | N-Nitrosodiphenylamine       | 86-30-6     | ph2 | 200 | -3 | N | N |

|               |                                                        |             |     |     |     |   |   |
|---------------|--------------------------------------------------------|-------------|-----|-----|-----|---|---|
| DTXSID9043938 | Monobenzyl phthalate                                   | 2528-16-7   | ph2 | 200 | -2  | N | N |
| DTXSID9023380 | Norethindrone                                          | 68-22-4     | ph2 | 200 | -3  | N | N |
| DTXSID6022345 | o,p'-DDT                                               | 789-02-6    | ph2 | 200 | 8   | N | N |
| DTXSID1032646 | N-Ethylperfluorooctanesulfonamide                      | 4151-50-2   | ph2 | 200 | 5   | N | N |
| DTXSID1020930 | Nicotine                                               | 54-11-5     | ph2 | 200 | 2   | N | N |
| DTXSID7021029 | N-Nitrosodimethylamine                                 | 62-75-9     | ph2 | 200 | -4  | N | N |
| DTXSID5020811 | Mercuric chloride                                      | 7487-94-7   | ph2 | 200 | 2   | N | N |
| DTXSID6021032 | N-Nitrosodipropylamine                                 | 621-64-7    | ph2 | 200 | 1   | N | N |
| DTXSID8029600 | Methacrylamide                                         | 79-39-0     | ph2 | 200 | -8  | N | N |
| DTXSID5021837 | N,N-Diethylethanolamine                                | 100-37-8    | ph2 | 200 | -1  | N | N |
| DTXSID3034165 | Nilutamide                                             | 63612-50-0  | ph2 | 200 | 5   | N | N |
| DTXSID0047167 | N-Methylacetamide                                      | 79-16-3     | ph2 | 200 | 5   | N | N |
| DTXSID3021641 | Nonanoic acid                                          | 112-05-0    | ph2 | 200 | -3  | N | N |
| DTXSID2020507 | N,N-Dimethylaniline                                    | 121-69-7    | ph2 | 207 | -4  | N | N |
| DTXSID5025607 | Methyleugenol                                          | 93-15-2     | ph2 | 200 | -9  | N | N |
| DTXSID5026889 | Methyl dodecanoate                                     | 111-82-0    | ph2 | 200 | 3   | N | N |
| DTXSID7020845 | Methyl methanesulfonate                                | 66-27-3     | ph2 | 200 | -10 | N | N |
| DTXSID9042209 | N-Methyldioctylamine                                   | 4455-26-9   | ph2 | 100 | 2   | N | N |
| DTXSID2021440 | N-Vinyl-2-pyrrolidone                                  | 88-12-0     | ph2 | 200 | 2   | N | N |
| DTXSID1020932 | Nicotinic acid                                         | 59-67-6     | ph2 | 200 | 0   | N | N |
| DTXSID1025271 | N-Ethylaniline                                         | 103-69-5    | ph2 | 200 | 0   | N | N |
| DTXSID2026864 | Methyl octanoate                                       | 111-11-5    | ph2 | 200 | 2   | N | N |
| DTXSID5023322 | Mifepristone                                           | 84371-65-3  | ph2 | 200 | 5   | N | N |
| DTXSID4042121 | Mepanipyrim                                            | 110235-47-7 | ph2 | 200 | -2  | Y | N |
| DTXSID0027640 | Malic acid                                             | 6915-15-7   | ph2 | 200 | -1  | N | N |
| DTXSID4021848 | N-Ethyl-3-methylaniline                                | 102-27-2    | ph2 | 200 | 3   | N | N |
| DTXSID9026689 | N,N,Nâ€²,Nâ€²-Tetrakis(2-hydroxypropyl)ethylenediamine | 102-60-3    | ph2 | 200 | -2  | N | N |
| DTXSID7020970 | Nitrofen                                               | 1836-75-5   | ph2 | 200 | -2  | N | N |
| DTXSID0025523 | Maltol                                                 | 118-71-8    | ph2 | 208 | -1  | N | N |
| DTXSID8025595 | N,N'-Methylenebisacrylamide                            | 110-26-9    | ph2 | 200 | 6   | N | N |



|               |                                                                                                                                                                         |             |     |     |    |   |   |
|---------------|-------------------------------------------------------------------------------------------------------------------------------------------------------------------------|-------------|-----|-----|----|---|---|
| DTXSID7047358 | Nelivaptan                                                                                                                                                              | 439687-69-1 | ph2 | 185 | 3  | N | N |
| DTXSID8021808 | o-Cresol                                                                                                                                                                | 95-48-7     | ph2 | 200 | -1 | N | N |
| DTXSID5021419 | l-Tryptophan                                                                                                                                                            | 73-22-3     | ph2 | 200 | 5  | N | N |
| DTXSID6020692 | Methenamine                                                                                                                                                             | 100-97-0    | ph2 | 204 | -3 | N | N |
| DTXSID4020822 | Methotrexate                                                                                                                                                            | 59-05-2     | ph2 | 200 | 4  | N | N |
| DTXSID6020939 | Nitrilotriacetic acid                                                                                                                                                   | 139-13-9    | ph2 | 183 | 4  | N | N |
| DTXSID0021125 | Phenolphthalein                                                                                                                                                         | 77-09-8     | ph2 | 200 | 8  | N | N |
| DTXSID9048514 | PharmaGSID_48514                                                                                                                                                        | NOCAS_48514 | ph2 | 200 | 1  | N | N |
| DTXSID4047333 | PharmaGSID_47333                                                                                                                                                        | NOCAS_47333 | ph2 | 200 | 0  | N | N |
| DTXSID3037707 | Potassium perfluorobutanesulfonate                                                                                                                                      | 29420-49-3  | ph2 | 200 | -1 | N | N |
| DTXSID6024254 | Phenanthrene                                                                                                                                                            | 85-01-8     | ph2 | 200 | 6  | N | N |
| DTXSID7027205 | Octamethylcyclotetrasiloxane                                                                                                                                            | 556-67-2    | ph2 | 200 | 0  | N | N |
| DTXSID2047307 | PD-0333941                                                                                                                                                              | 501027-49-2 | ph2 | 200 | 4  | N | N |
| DTXSID4032459 | Phorate                                                                                                                                                                 | 298-02-2    | ph2 | 200 | 1  | N | N |
| DTXSID3029289 | Oxazolidine-E                                                                                                                                                           | 7747-35-5   | ph2 | 200 | 1  | N | N |
| DTXSID7041097 | PK 11195                                                                                                                                                                | 85532-75-8  | ph2 | 50  | 0  | N | N |
| DTXSID5047538 | Pentane-1,5-diyl dibenzoate                                                                                                                                             | 6624-73-3   | ph2 | 200 | 2  | N | N |
| DTXSID7048166 | 3,9-Epoxy-3H-azirino[2,3-c][1]benzazocine-5-carboxaldehyde, 1-acetyl-9-(acetyloxy)-8-[[[(aminocarbonyl)oxy]methyl]-1,1a,2,8,9,9a-hexahydro-7-methoxy-, (1aS,8R,9S,9aS)- | NOCAS_48166 | ph2 | 200 | -3 | N | N |
| DTXSID9047330 | PharmaGSID_47330                                                                                                                                                        | NOCAS_47330 | ph2 | 200 | -1 | N | N |
| DTXSID6027268 | Pentadecane                                                                                                                                                             | 629-62-9    | ph2 | 200 | 1  | N | N |
| DTXSID1025805 | Octhilinone                                                                                                                                                             | 26530-20-1  | ph2 | 208 | 21 | N | N |
| DTXSID0047292 | PD 0200347                                                                                                                                                              | NOCAS_47292 | ph2 | 200 | -2 | N | N |
| DTXSID7021653 | Pentanal                                                                                                                                                                | 110-62-3    | ph2 | 200 | 1  | N | N |
| DTXSID4048519 | PharmaGSID_48519                                                                                                                                                        | 686756-87-6 | ph2 | 200 | 2  | N | N |
| DTXSID7021150 | Phenylmercuric acetate                                                                                                                                                  | 62-38-4     | ph2 | 200 | 1  | N | N |
| DTXSID3026645 | p-Cymene                                                                                                                                                                | 99-87-6     | ph2 | 200 | 0  | N | N |
| DTXSID0048505 | PharmaGSID_48505                                                                                                                                                        | NOCAS_48505 | ph2 | 200 | 0  | N | N |

|               |                                    |              |     |     |    |   |   |
|---------------|------------------------------------|--------------|-----|-----|----|---|---|
| DTXSID5021097 | Oxytetracycline hydrochloride      | 2058-46-0    | ph2 | 200 | -2 | N | N |
| DTXSID8023927 | p-Bromodiphenyl ether              | 101-55-3     | ph2 | 200 | 4  | N | N |
| DTXSID1027263 | Pentyl acetate                     | 628-63-7     | ph2 | 200 | -6 | N | N |
| DTXSID7047271 | PD 0343701                         | 676116-04-4  | ph2 | 200 | 5  | N | N |
| DTXSID5048506 | PharmaGSID_48506                   | 588941-45-1  | ph2 | 200 | 0  | N | N |
| DTXSID9048516 | PharmaGSID_48516                   | NOCAS_48516  | ph2 | 200 | 2  | N | N |
| DTXSID1021164 | Piperazine                         | 110-85-0     | ph2 | 200 | 0  | N | N |
| DTXSID4048511 | PharmaGSID_48511                   | 1062243-51-9 | ph2 | 186 | 0  | N | N |
| DTXSID3047263 | PharmaGSID_47263                   | 349495-42-7  | ph2 | 200 | -3 | N | N |
| DTXSID8047553 | Perfluoroundecanoic acid           | 2058-94-8    | ph2 | 200 | 27 | Y | N |
| DTXSID8031863 | Perfluorononanoic acid             | 375-95-1     | ph2 | 200 | 13 | N | N |
| DTXSID4047337 | PharmaGSID_47337                   | 1061517-62-1 | ph2 | 200 | 57 | Y | N |
| DTXSID0048509 | PharmaGSID_48509                   | NOCAS_48509  | ph2 | 200 | 0  | N | N |
| DTXSID1048172 | PharmaGSID_48172                   | NOCAS_48172  | ph2 | 159 | 0  | N | N |
| DTXSID9048518 | PharmaGSID_48518                   | NOCAS_48518  | ph2 | 200 | 2  | N | N |
| DTXSID7021106 | Pentachlorophenol                  | 87-86-5      | ph2 | 102 | 8  | N | N |
| DTXSID4020373 | p,p'-DDD                           | 72-54-8      | ph2 | 200 | 5  | N | N |
| DTXSID3031862 | Perfluorohexanoic acid             | 307-24-4     | ph2 | 200 | 3  | N | N |
| DTXSID5021126 | Phenothiazine                      | 92-84-2      | ph2 | 200 | 2  | N | N |
| DTXSID4040713 | Octyl gallate                      | 1034-01-1    | ph2 | 200 | 49 | Y | N |
| DTXSID3037709 | Potassium perfluorohexanesulfonate | 3871-99-6    | ph2 | 200 | 5  | N | N |
| DTXSID3021643 | Octanal                            | 124-13-0     | ph2 | 200 | 3  | N | N |
| DTXSID5023796 | Pentamidine isethionate            | 140-64-7     | ph2 | 175 | 7  | N | N |
| DTXSID3044203 | Pioglitazone hydrochloride         | 112529-15-4  | ph2 | 200 | -1 | N | N |
| DTXSID8021642 | Octadecanoic acid                  | 57-11-4      | ph2 | 100 | -1 | N | N |
| DTXSID9027522 | Octrizole                          | 3147-75-9    | ph2 | 200 | 9  | N | N |
| DTXSID1047285 | PHA-00568487                       | 527680-56-4  | ph2 | 200 | -3 | N | N |
| DTXSID9020374 | p,p'-DDE                           | 72-55-9      | ph2 | 200 | 9  | N | N |
| DTXSID3038939 | Perfluorooctanesulfonamide         | 754-91-6     | ph2 | 200 | 13 | N | N |
| DTXSID0048507 | PharmaGSID_48507                   | NOCAS_48507  | ph2 | 200 | 1  | N | N |
| DTXSID5024261 | Phosmet                            | 732-11-6     | ph2 | 200 | 3  | N | N |

|               |                                 |              |     |     |    |   |   |
|---------------|---------------------------------|--------------|-----|-----|----|---|---|
| DTXSID2026943 | Pentaerythritol                 | 115-77-5     | ph2 | 200 | 4  | N | N |
| DTXSID4020290 | Pirinixic acid                  | 50892-23-4   | ph2 | 200 | 6  | N | N |
| DTXSID5022439 | Phenolphthalin                  | 81-90-3      | ph2 | 200 | 2  | N | N |
| DTXSID3031860 | Perfluorodecanoic acid          | 335-76-2     | ph2 | 200 | 45 | Y | N |
| DTXSID5021124 | Phenol                          | 108-95-2     | ph2 | 200 | 1  | N | N |
| DTXSID1037303 | Perfluoroheptanoic acid         | 375-85-9     | ph2 | 200 | 8  | N | N |
| DTXSID2022179 | Pentachloropyridine             | 2176-62-7    | ph2 | 200 | 1  | N | N |
| DTXSID3021645 | Octanoic acid                   | 124-07-2     | ph2 | 200 | -1 | N | N |
| DTXSID9048510 | PharmaGSID_48510                | 460081-99-6  | ph2 | 200 | 3  | N | N |
| DTXSID3048520 | Piragliatin                     | 625114-41-2  | ph2 | 50  | 4  | N | N |
| DTXSID9047542 | Picoxystrobin                   | 117428-22-5  | ph2 | 200 | 3  | N | N |
| DTXSID8048521 | PharmaGSID_48521                | 1191914-21-2 | ph2 | 180 | 4  | N | N |
| DTXSID9020164 | Pentaerythritol dibromide       | 3296-90-0    | ph2 | 200 | 1  | N | N |
| DTXSID4048513 | PharmaGSID_48513                | 825643-57-0  | ph2 | 163 | 12 | N | N |
| DTXSID6047284 | PHA-00543613                    | 478149-53-0  | ph2 | 200 | 3  | N | N |
| DTXSID7021869 | p-Cresol                        | 106-44-5     | ph2 | 200 | 2  | N | N |
| DTXSID8020121 | Sodium azide                    | 26628-22-8   | ph2 | 200 | 4  | N | N |
| DTXSID5021201 | Propyl gallate                  | 121-79-9     | ph2 | 200 | 10 | N | N |
| DTXSID7021992 | Sodium saccharin hydrate        | 82385-42-0   | ph2 | 200 | 5  | N | N |
| DTXSID4047339 | SR144190                        | 181640-09-5  | ph2 | 173 | 1  | N | N |
| DTXSID5047324 | SB281832                        | 219790-72-4  | ph2 | 200 | 13 | N | N |
| DTXSID0021254 | Safrole                         | 94-59-7      | ph2 | 200 | 5  | N | N |
| DTXSID6047369 | SR146131 trifluoroacetate (1:1) | 221671-62-1  | ph2 | 200 | 15 | N | N |
| DTXSID6027050 | Sodium dimethyldithiocarbamate  | 128-04-1     | ph2 | 200 | 5  | N | N |
| DTXSID4047387 | SAR102779                       | NOCAS_47387  | ph2 | 200 | 16 | N | N |
| DTXSID0020941 | Sodium nitrite                  | 7632-00-0    | ph2 | 200 | 3  | N | N |
| DTXSID1023819 | Stavudine                       | 3056-17-5    | ph2 | 200 | -1 | N | N |
| DTXSID3026302 | Sodium xylenesulfonate          | 1300-72-7    | ph2 | 200 | 1  | N | N |
| DTXSID3042390 | Sodium (2-pyridylthio)-N-oxide  | 3811-73-2    | ph2 | 200 | -1 | N | N |
| DTXSID5047322 | SB243213A                       | 200940-23-4  | ph2 | 184 | 5  | N | N |
| DTXSID4021185 | Prednisone                      | 53-03-2      | ph2 | 200 | 4  | N | N |

|               |                                    |              |     |     |    |   |   |
|---------------|------------------------------------|--------------|-----|-----|----|---|---|
| DTXSID0020105 | Sodium L-ascorbate                 | 134-03-2     | ph2 | 200 | 1  | N | N |
| DTXSID6034186 | Spirolactone                       | 52-01-7      | ph2 | 200 | 5  | N | N |
| DTXSID4021218 | Quercetin                          | 117-39-5     | ph2 | 200 | 15 | N | N |
| DTXSID2047353 | SSR 241586 HCl                     | NOCAS_47353  | ph2 | 80  | 8  | N | N |
| DTXSID3047342 | SR125047                           | NOCAS_47342  | ph2 | 181 | 31 | N | N |
| DTXSID1047366 | SAR115740                          | NOCAS_47366  | ph2 | 200 | 5  | N | N |
| DTXSID6034924 | Sodium trichloroacetate            | 650-51-1     | ph2 | 200 | -3 | N | N |
| DTXSID3042219 | Propylbenzene                      | 103-65-1     | ph2 | 200 | -3 | N | N |
| DTXSID4047389 | SAR 150640                         | 433212-21-6  | ph2 | 200 | 11 | N | N |
| DTXSID3027320 | Sodium 4-nitrophenolate            | 824-78-2     | ph2 | 200 | -2 | N | N |
| DTXSID8047341 | SSR146977                          | 264618-44-2  | ph2 | 50  | 9  | N | N |
| DTXSID3047348 | SSR504734                          | 742693-38-5  | ph2 | 200 | 11 | N | N |
| DTXSID1026031 | Sodium dodecyl sulfate             | 151-21-3     | ph2 | 200 | 58 | Y | N |
| DTXSID2021238 | Resorcinol                         | 108-46-3     | ph2 | 200 | 0  | N | N |
| DTXSID8047391 | SAR102608                          | 1068967-96-3 | ph2 | 200 | 1  | N | N |
| DTXSID4042416 | Sodium myristyl sulfate            | 1191-50-0    | ph2 | 200 | 82 | Y | N |
| DTXSID1034181 | Raloxifene hydrochloride           | 82640-04-8   | ph2 | 200 | 3  | N | N |
| DTXSID8037706 | Potassium perfluorooctanesulfonate | 2795-39-3    | ph2 | 200 | 36 | N | N |
| DTXSID9033923 | Procymidone                        | 32809-16-8   | ph2 | 200 | 6  | N | N |
| DTXSID1029677 | Silica                             | 7631-86-9    | ph2 | 200 | -2 | N | N |
| DTXSID1047360 | SR58611                            | 929601-09-2  | ph2 | 183 | 6  | N | N |
| DTXSID2047359 | SSR180711                          | 298198-52-4  | ph2 | 200 | -2 | N | N |
| DTXSID0047325 | SB413217A                          | NOCAS_47325  | ph2 | 93  | 1  | N | N |
| DTXSID2021286 | Styrene oxide                      | 96-09-3      | ph2 | 200 | -1 | N | N |
| DTXSID0023581 | Simvastatin                        | 79902-63-9   | ph2 | 200 | 4  | N | N |
| DTXSID1047362 | SSR150106                          | NOCAS_47362  | ph2 | 200 | 9  | N | N |
| DTXSID7025219 | Sodium dodecylbenzenesulfonate     | 25155-30-0   | ph2 | 200 | 90 | Y | N |
| DTXSID0047379 | SSR126768                          | NOCAS_47379  | ph2 | 200 | 2  | N | N |
| DTXSID1020140 | Sodium benzoate                    | 532-32-1     | ph2 | 200 | -1 | N | N |
| DTXSID9048512 | Ro 23-7637                         | 107071-66-9  | ph2 | 183 | 2  | N | N |
| DTXSID2047351 | SSR 240612                         | 464930-42-5  | ph2 | 133 | 6  | N | N |

|               |                                     |              |     |     |    |   |   |
|---------------|-------------------------------------|--------------|-----|-----|----|---|---|
| DTXSID3023556 | Retinol                             | 68-26-8      | ph2 | 209 | 3  | N | N |
| DTXSID1021798 | Quinoline                           | 91-22-5      | ph2 | 200 | -3 | N | N |
| DTXSID7021237 | Reserpine                           | 50-55-5      | ph2 | 103 | -4 | N | N |
| DTXSID7026029 | Sodium dehydroacetate               | 4418-26-2    | ph2 | 200 | -4 | N | N |
| DTXSID8021272 | Sodium chlorite                     | 7758-19-2    | ph2 | 200 | -6 | N | N |
| DTXSID8047347 | SR271425                            | 155990-20-8  | ph2 | 200 | 10 | N | N |
| DTXSID6047525 | Pravastatin sodium                  | 81131-70-6   | ph2 | 100 | 2  | N | N |
| DTXSID5020570 | Sodium erythorbate (1:1)            | 6381-77-7    | ph2 | 200 | 1  | N | N |
| DTXSID1047318 | SB202235                            | 139149-55-6  | ph2 | 200 | 3  | N | N |
| DTXSID0042400 | Sodium hexyldecyl sulfate           | 1120-01-0    | ph2 | 100 | 58 | Y | N |
| DTXSID5047374 | SSR161421                           | NOCAS_47374  | ph2 | 200 | 6  | N | N |
| DTXSID6027397 | Sorbitan, mono-(9Z)-9-octadecenoate | 1338-43-8    | ph2 | 200 | 10 | N | N |
| DTXSID4022527 | Propylparaben                       | 94-13-3      | ph2 | 200 | 4  | N | N |
| DTXSID4023541 | Pyridoxine                          | 65-23-6      | ph2 | 200 | -6 | N | N |
| DTXSID3047346 | SSR162369                           | NOCAS_47346  | ph2 | 200 | 7  | N | N |
| DTXSID1047368 | SSR69071                            | 344930-95-6  | ph2 | 50  | -3 | N | N |
| DTXSID4047385 | SAR377142                           | NOCAS_47385  | ph2 | 200 | -1 | N | N |
| DTXSID9021217 | Pyrimethamine                       | 58-14-0      | ph2 | 200 | 1  | N | N |
| DTXSID1047364 | SSR 103800                          | 1075752-90-7 | ph2 | 185 | 9  | N | N |
| DTXSID3024289 | Pyrene                              | 129-00-0     | ph2 | 200 | 7  | N | N |
| DTXSID3022370 | Progesterone                        | 57-83-0      | ph2 | 200 | 1  | N | N |
| DTXSID6021244 | Rifampicin                          | 13292-46-1   | ph2 | 200 | 9  | N | N |
| DTXSID1021952 | Triphenyl phosphate                 | 115-86-6     | ph2 | 200 | 3  | N | N |
| DTXSID3047138 | tert-Butylbenzene                   | 98-06-6      | ph2 | 200 | 1  | N | N |
| DTXSID0047533 | Trioctyl trimellitate               | 89-04-3      | ph2 | 202 | -1 | N | N |
| DTXSID4021393 | Triethylene glycol                  | 112-27-6     | ph2 | 200 | 1  | N | N |
| DTXSID8023719 | Troglitazone                        | 97322-87-7   | ph2 | 200 | 53 | Y | N |
| DTXSID5028033 | Triisononyl trimellitate            | 53894-23-8   | ph2 | 200 | 3  | N | N |
| DTXSID9032113 | Tebuconazole                        | 107534-96-3  | ph2 | 200 | 3  | N | N |
| DTXSID3021358 | Tolazamide                          | 1156-19-0    | ph2 | 200 | -1 | N | N |
| DTXSID2021288 | Sucrose                             | 57-50-1      | ph2 | 200 | 1  | N | N |

|               |                                          |             |     |     |    |   |   |
|---------------|------------------------------------------|-------------|-----|-----|----|---|---|
| DTXSID8026224 | Triethylene glycol dimethyl ether        | 112-49-2    | ph2 | 200 | -2 | N | N |
| DTXSID3026223 | Triethylene glycol diacetate             | 111-21-7    | ph2 | 200 | -1 | N | N |
| DTXSID1021378 | Trichloroacetic acid                     | 76-03-9     | ph2 | 200 | 0  | N | N |
| DTXSID1047287 | UK-333747                                | 197077-55-7 | ph2 | 200 | 1  | N | N |
| DTXSID3026564 | Triethylene glycol bis(2-ethylhexanoate) | 94-28-0     | ph2 | 200 | 3  | N | N |
| DTXSID5047295 | UK-373911                                | 291305-06-1 | ph2 | 200 | 10 | N | N |
| DTXSID2047355 | Trelanserlin                             | 189003-92-7 | ph2 | 200 | -1 | N | N |
| DTXSID7023645 | Tetracycline                             | 60-54-8     | ph2 | 200 | 4  | N | N |
| DTXSID2045232 | Tiratricol                               | 51-24-1     | ph2 | 200 | 26 | N | N |
| DTXSID1040742 | Triamcinolone                            | 124-94-7    | ph2 | 200 | 1  | N | N |
| DTXSID4021426 | Urea                                     | 57-13-6     | ph2 | 200 | -1 | N | N |
| DTXSID0040701 | Triethyl citrate                         | 77-93-0     | ph2 | 200 | 1  | N | N |
| DTXSID9026261 | Tris(1,3-dichloro-2-propyl) phosphate    | 13674-87-8  | ph2 | 200 | 2  | N | N |
| DTXSID9036515 | Testosterone propionate                  | 57-85-2     | ph2 | 200 | 8  | N | N |
| DTXSID4027608 | Terbutylazine                            | 5915-41-3   | ph2 | 200 | 3  | N | N |
| DTXSID2047357 | Surinabant                               | 288104-79-0 | ph2 | 200 | 0  | N | N |
| DTXSID3021986 | Tributyl phosphate                       | 126-73-8    | ph2 | 200 | 0  | N | N |
| DTXSID3027403 | Tributyltin chloride                     | 1461-22-9   | ph2 | 200 | 4  | N | N |
| DTXSID9021427 | Urethane                                 | 51-79-6     | ph2 | 200 | 4  | N | N |
| DTXSID0026252 | Triphenyl phosphite                      | 101-02-0    | ph2 | 200 | 0  | N | N |
| DTXSID5021336 | Theophylline                             | 58-55-9     | ph2 | 200 | -1 | N | N |
| DTXSID1034187 | Tamoxifen                                | 10540-29-1  | ph2 | 100 | 25 | Y | N |
| DTXSID2026076 | Tannic acid                              | 1401-55-4   | ph2 | 70  | 92 | Y | N |
| DTXSID9021689 | Undecane                                 | 1120-21-4   | ph2 | 200 | -5 | N | N |
| DTXSID4026262 | Triglycidyl isocyanurate                 | 2451-62-9   | ph2 | 200 | -1 | N | N |
| DTXSID9021392 | Triethanolamine                          | 102-71-6    | ph2 | 200 | 2  | N | N |
| DTXSID9024699 | tert-Butyl perbenzoate                   | 614-45-9    | ph2 | 200 | 4  | N | N |
| DTXSID7024376 | Vernolate                                | 1929-77-7   | ph2 | 200 | 0  | N | N |
| DTXSID2047309 | UK-156819                                | 162706-14-1 | ph2 | 200 | 3  | N | N |
| DTXSID0021256 | Sulfasalazine                            | 599-79-1    | ph2 | 200 | 0  | N | N |

|               |                                      |             |     |     |    |   |   |
|---------------|--------------------------------------|-------------|-----|-----|----|---|---|
| DTXSID5023742 | Warfarin                             | 81-81-2     | ph2 | 200 | 2  | N | N |
| DTXSID6047288 | UK-337312                            | 203942-49-8 | ph2 | 200 | 57 | Y | N |
| DTXSID7026156 | Toluene-2,4-diisocyanate             | 584-84-9    | ph2 | 200 | -2 | N | N |
| DTXSID3041376 | Tridemorph                           | 24602-86-6  | ph2 | 200 | 4  | N | N |
| DTXSID5047320 | SB236057A                            | 180084-01-9 | ph2 | 200 | 6  | N | N |
| DTXSID4026183 | Tributylamine                        | 102-82-9    | ph2 | 200 | 1  | N | N |
| DTXSID2029246 | Triethoxyoctylsilane                 | 2943-75-1   | ph2 | 200 | -3 | N | N |
| DTXSID5048186 | Tetrac                               | 67-30-1     | ph2 | 22  | -1 | N | N |
| DTXSID8021301 | Tamoxifen citrate                    | 54965-24-1  | ph2 | 183 | 46 | Y | N |
| DTXSID0041141 | o-(Chloroacetylcarbamoyl)fumagillol  | 129298-91-5 | ph2 | 64  | 1  | N | N |
| DTXSID3042423 | Sucrose octaacetate                  | 126-14-7    | ph2 | 151 | -1 | N | N |
| DTXSID6034972 | Thymol                               | 89-83-8     | ph2 | 200 | -1 | N | N |
| DTXSID9026265 | Tris(2-ethylhexyl) trimellitate      | 3319-31-1   | ph2 | 200 | -1 | N | N |
| DTXSID6047311 | GSK163929B                           | NOCAS_47311 | ph2 | 200 | 4  | N | N |
| DTXSID4026214 | Triclocarban                         | 101-20-2    | ph2 | 200 | -1 | N | N |
| DTXSID0047290 | UK-416244                            | 402910-27-4 | ph2 | 200 | 2  | N | N |
| DTXSID2022254 | Terbufos                             | 13071-79-9  | ph2 | 200 | 3  | N | N |
| DTXSID3026691 | Triacetin                            | 102-76-1    | ph2 | 200 | 1  | N | N |
| DTXSID9022524 | Thalidomide                          | 50-35-1     | ph2 | 200 | -1 | N | N |
| DTXSID6020220 | tert-Butylhydroquinone               | 1948-33-0   | ph2 | 200 | 5  | N | N |
| DTXSID6047363 | Volinanserin                         | 139290-65-6 | ph2 | 200 | 2  | N | N |
| DTXSID5021411 | Tris(2-chloroethyl) phosphate        | 115-96-8    | ph2 | 200 | 1  | N | N |
| DTXSID1047289 | UK-343664                            | 215297-27-1 | ph2 | 100 | 1  | N | N |
| DTXSID2029329 | Tripropylene glycol monomethyl ether | 25498-49-1  | ph2 | 200 | 3  | N | N |
| DTXSID9026132 | Theobromine                          | 83-67-0     | ph2 | 84  | 3  | N | N |
| DTXSID9035204 | Tributyltin methacrylate             | 2155-70-6   | ph2 | 200 | 7  | N | N |
| DTXSID6023733 | Valproic acid                        | 99-66-1     | ph2 | 200 | 1  | N | N |
| DTXSID0021414 | Tris(2-ethylhexyl) phosphate         | 78-42-2     | ph2 | 200 | 3  | N | N |
| DTXSID2031089 | D&C Red 27                           | 13473-26-2  | ph3 | 132 | 78 | Y | N |
| DTXSID9034737 | Metiram                              | 9006-42-2   | ph3 | 60  | 11 | N | N |
| DTXSID9023209 | L-Dopa                               | 59-92-7     | ph3 | 50  | -1 | N | N |

|               |                                            |            |     |     |    |   |   |
|---------------|--------------------------------------------|------------|-----|-----|----|---|---|
| DTXSID8047896 | Enzacamene                                 | 36861-47-9 | ph3 | 200 | 10 | N | N |
| DTXSID7021784 | Salicylanilide                             | 87-17-2    | ph3 | 200 | 0  | Y | N |
| DTXSID5052832 | 2,2',3,4',5,5',6-Heptachloro-1,1'-biphenyl | 52663-68-0 | ph3 | 125 | 15 | N | N |
| DTXSID6021290 | Sulfamethazine                             | 57-68-1    | ph3 | 200 | 0  | N | N |
| DTXSID5044811 | Chlordimeform hydrochloride                | 19750-95-9 | ph3 | 200 | -2 | N | N |
| DTXSID4031980 | Resveratrol                                | 501-36-0   | ph3 | 200 | 5  | N | N |
| DTXSID4040767 | 3,5-Dichlorosalicyl-3,4-dichloroanilide    | 1154-59-2  | ph3 | 200 | 78 | Y | N |
| DTXSID3047003 | Potassium perchlorate                      | 7778-74-7  | ph3 | 208 | 12 | N | N |
| DTXSID4024515 | Ammonium perchlorate                       | 7790-98-9  | ph3 | 200 | -5 | N | N |
| DTXSID3041403 | 2-Chloro-1,4-dimethoxybenzene              | 2100-42-7  | ph3 | 200 | 2  | N | N |
| DTXSID3040300 | 4-Chlorobiphenyl                           | 2051-62-9  | ph3 | 200 | 7  | N | N |
| DTXSID3034903 | Sodium bromide                             | 7647-15-6  | ph3 | 200 | 2  | N | N |
| DTXSID0041985 | Fluorosalan                                | 4776-06-1  | ph3 | 200 | 54 | Y | N |
| DTXSID0027014 | 2-Octanol                                  | 123-96-6   | e1k | 200 | 5  | N | N |
| DTXSID0034229 | gamma-Nonanolactone                        | 104-61-0   | e1k | 200 | 2  | N | N |
| DTXSID0020151 | Benzyl acetate                             | 140-11-4   | e1k | 200 | -3 | N | N |
| DTXSID0029133 | 4-Hydroxyacetophenone                      | 99-93-4    | e1k | 200 | 1  | N | N |
| DTXSID0029761 | Sodium dichloro-s-triazinetriene dihydrate | 51580-86-0 | e1k | 200 | 6  | N | N |
| DTXSID0024553 | Azodicarbonamide                           | 123-77-3   | e1k | 200 | -2 | N | N |
| DTXSID0023296 | Methylene blue                             | 61-73-4    | e1k | 200 | 54 | Y | N |
| DTXSID0021175 | Polysorbate 80                             | 9005-65-6  | e1k | 179 | 10 | N | N |
| DTXSID0034518 | Desmedipham                                | 13684-56-5 | e1k | 200 | 5  | N | N |
| DTXSID0021888 | 2-Pentanone                                | 107-87-9   | e1k | 200 | 2  | N | N |
| DTXSID0025234 | Eosin                                      | 17372-87-1 | e1k | 193 | 96 | Y | N |
| DTXSID0020737 | Indole                                     | 120-72-9   | e1k | 200 | 6  | N | N |
| DTXSID0032316 | 4-Chloro-3,5-dimethylphenol                | 88-04-0    | e1k | 200 | 7  | N | N |
| DTXSID0026171 | Tolyltriazole                              | 29385-43-1 | e1k | 200 | -2 | N | N |
| DTXSID0029210 | Butyltin trichloride                       | 1118-46-3  | e1k | 200 | 6  | N | N |
| DTXSID0029214 | Methylionone                               | 1335-46-2  | e1k | 200 | 5  | N | N |



|               |                                                                  |             |     |     |    |   |   |
|---------------|------------------------------------------------------------------|-------------|-----|-----|----|---|---|
| DTXSID0029848 | Acetic acid, C8-10-branched alkyl esters, C9-rich                | 108419-33-6 | e1k | 200 | 4  | N | N |
| DTXSID0020076 | Amitrole                                                         | 61-82-5     | e1k | 200 | -2 | N | N |
| DTXSID0027721 | 4-(2-Phenylpropan-2-yl)-N-[4-(2-phenylpropan-2-yl)phenyl]aniline | 10081-67-1  | e1k | 200 | 11 | N | N |
| DTXSID0038700 | 2-Methoxy-4-nitroaniline                                         | 97-52-9     | e1k | 200 | 10 | N | N |
| DTXSID0023113 | 2-Methoxyphenol                                                  | 90-05-1     | e1k | 201 | 6  | N | N |
| DTXSID0035160 | alpha-Ionone                                                     | 127-41-3    | e1k | 200 | 1  | N | N |
| DTXSID0020107 | Aspartame                                                        | 22839-47-0  | e1k | 200 | 2  | N | N |
| DTXSID0041357 | Ethyl (2E,4Z)-deca-2,4-dienoate                                  | 3025-30-7   | e1k | 207 | 6  | N | N |
| DTXSID0022480 | 3-Ethylphenol                                                    | 620-17-7    | e1k | 205 | -1 | N | N |
| DTXSID0038887 | Fluorescein                                                      | 2321-07-5   | e1k | 200 | 3  | Y | N |
| DTXSID0025101 | 3-Dimethylaminophenol                                            | 99-07-0     | e1k | 200 | 7  | N | N |
| DTXSID0026258 | Tris(2-chloroethyl) phosphite                                    | 140-08-9    | e1k | 200 | 10 | N | N |
| DTXSID0042406 | Sodium methyl sulfate                                            | 512-42-5    | e1k | 200 | 1  | N | N |
| DTXSID0027222 | Terpinolene                                                      | 586-62-9    | e1k | 200 | 0  | N | N |
| DTXSID0041567 | (9Z,12R)-12-Hydroxyoctadec-9-enoic acid                          | 141-22-0    | e1k | 200 | 11 | N | N |
| DTXSID0037730 | 1,4-Dihydroxy-2-naphthoic acid                                   | 31519-22-9  | e1k | 200 | 37 | N | N |
| DTXSID0042167 | Monopotassium phthalate                                          | 877-24-7    | e1k | 205 | -2 | N | N |
| DTXSID0021460 | Zearalenone                                                      | 17924-92-4  | e1k | 200 | 8  | N | N |
| DTXSID0020656 | Gibberellic acid                                                 | 77-06-5     | e1k | 200 | 0  | N | N |
| DTXSID0023745 | D-Xylose                                                         | 58-86-6     | e1k | 200 | -1 | N | N |
| DTXSID0027191 | 1,3-Cyclopentadiene                                              | 542-92-7    | e1k | 200 | 4  | N | N |
| DTXSID0034722 | Topramezone                                                      | 210631-68-8 | e1k | 86  | 0  | N | N |
| DTXSID0038881 | C.I. Acid Orange 7                                               | 633-96-5    | e1k | 100 | 8  | N | N |
| DTXSID0025864 | 4-Ethoxyaniline                                                  | 156-43-4    | e1k | 200 | 2  | N | N |
| DTXSID0025816 | Oxalic acid                                                      | 144-62-7    | e1k | 200 | 5  | N | N |
| DTXSID0042454 | Tetradecanoic acid, 2,3-dihydroxypropyl ester                    | 589-68-4    | e1k | 200 | 13 | Y | N |
| DTXSID0035748 | Chloroallyl methenamine chloride                                 | 51229-78-8  | e1k | 200 | 3  | N | N |
| DTXSID0022353 | 2-Chloro-4-phenylphenol                                          | 92-04-6     | e1k | 200 | 24 | N | N |

|               |                                      |            |     |     |    |   |   |
|---------------|--------------------------------------|------------|-----|-----|----|---|---|
| DTXSID0020575 | Estragole                            | 140-67-0   | e1k | 200 | 1  | N | N |
| DTXSID0042379 | Dimethoxydimethylsilane              | 1112-39-6  | e1k | 200 | -1 | N | N |
| DTXSID0021597 | Heptanal                             | 111-71-7   | e1k | 200 | 37 | N | N |
| DTXSID0047957 | Octylparaben                         | 1219-38-1  | e1k | 200 | 82 | Y | N |
| DTXSID0020286 | 3-Chloro-4-methylaniline             | 95-74-9    | e1k | 207 | 0  | N | N |
| DTXSID0041981 | Fluoroacetic acid                    | 144-49-0   | e1k | 200 | -2 | N | N |
| DTXSID0042086 | Laurocapram                          | 59227-89-3 | e1k | 200 | 23 | N | N |
| DTXSID0042169 | Monotridecyl phosphate               | 5116-94-9  | e1k | 200 | 76 | Y | N |
| DTXSID0029559 | Diazolidinyl urea                    | 78491-02-8 | e1k | 200 | -7 | N | N |
| DTXSID0026838 | Isopropyl tetradecanoate             | 110-27-0   | e1k | 200 | -1 | N | N |
| DTXSID0022436 | Diphenolic acid                      | 126-00-1   | e1k | 200 | 5  | N | N |
| DTXSID0041646 | C.I. Acid Yellow 34, monosodium salt | 6359-90-6  | e1k | 200 | 6  | N | N |
| DTXSID0020494 | Dimethyl methylphosphonate           | 756-79-6   | e1k | 200 | 1  | N | N |
| DTXSID0044575 | MON-4660                             | 71526-07-3 | e1k | 200 | 4  | N | N |
| DTXSID0025363 | Glycolic acid                        | 79-14-1    | e1k | 200 | 1  | N | N |
| DTXSID0047741 | Dibenzothiophene                     | 132-65-0   | e1k | 200 | 7  | N | N |
| DTXSID0020814 | Mestranol                            | 72-33-3    | e1k | 200 | 2  | N | N |
| DTXSID0041270 | 3,5,5-Trimethylhexyl acetate         | 58430-94-7 | e1k | 200 | -2 | N | N |
| DTXSID0026880 | 1,2-Ethanediol diacetate             | 111-55-7   | e1k | 200 | -4 | N | N |
| DTXSID0042325 | 4-Propylanisole                      | 104-45-0   | e1k | 201 | -3 | N | N |
| DTXSID0020652 | Gemfibrozil                          | 25812-30-0 | e1k | 200 | -1 | N | N |
| DTXSID0027852 | Chlorotoluene                        | 25168-05-2 | e1k | 200 | 1  | N | N |
| DTXSID0041484 | (3Z)-3-Hexenyl acetate               | 3681-71-8  | e1k | 200 | 3  | N | N |
| DTXSID0044571 | 3-Isopropylphenol                    | 618-45-1   | e1k | 200 | 11 | N | N |
| DTXSID0044818 | 2-Butyloctan-1-ol                    | 3913-02-8  | e1k | 200 | 16 | N | N |
| DTXSID0022014 | Hydroquinone dimethyl ether          | 150-78-7   | e1k | 200 | 3  | N | N |
| DTXSID0041274 | 1-Phenyl-1H-pyrrole-2,5-dione        | 941-69-5   | e1k | 200 | -2 | N | N |
| DTXSID0042038 | Heptyl butanoate                     | 5870-93-9  | e1k | 200 | 5  | N | N |
| DTXSID1021792 | Salicylaldehyde                      | 90-02-8    | e1k | 200 | 9  | N | N |
| DTXSID1025300 | 2-Ethylhexyl diphenyl phosphate      | 1241-94-7  | e1k | 200 | 11 | N | N |

|               |                                         |            |     |     |     |   |   |
|---------------|-----------------------------------------|------------|-----|-----|-----|---|---|
| DTXSID1027479 | 2-(2H-Benzotriazol-2-yl)-4-methylphenol | 2440-22-4  | e1k | 200 | 15  | N | N |
| DTXSID1020354 | Cyanoguanidine                          | 461-58-5   | e1k | 200 | 10  | N | N |
| DTXSID1025857 | 1,10-Phenanthroline                     | 66-71-7    | e1k | 200 | -3  | N | N |
| DTXSID0048185 | Apomorphine hydrochloride hydrate       | 41372-20-7 | e1k | 80  | 8   | N | N |
| DTXSID1027891 | Calcium dodecylbenzene sulfonate        | 26264-06-2 | e1k | 200 | 102 | Y | N |
| DTXSID1020805 | dl-Menthol                              | 89-78-1    | e1k | 200 | -2  | N | N |
| DTXSID1022396 | Chrysin                                 | 480-40-0   | e1k | 200 | -1  | N | N |
| DTXSID1027633 | Irganox 1010                            | 6683-19-8  | e1k | 89  | 1   | N | N |
| DTXSID1025148 | 3,5-Dimethylphenol                      | 108-68-9   | e1k | 205 | 4   | N | N |
| DTXSID1029170 | 4-Methylpent-3-en-2-one                 | 141-79-7   | e1k | 200 | 6   | N | N |
| DTXSID1026033 | Sodium ethasulfate                      | 126-92-1   | e1k | 200 | 9   | N | N |
| DTXSID1026904 | 2-Butoxyethyl acetate                   | 112-07-2   | e1k | 200 | 4   | N | N |
| DTXSID1027926 | Dodecylphenol                           | 27193-86-8 | e1k | 200 | 97  | Y | N |
| DTXSID1026118 | Tetralin                                | 119-64-2   | e1k | 200 | -2  | N | N |
| DTXSID1022421 | Melatonin                               | 73-31-4    | e1k | 200 | 3   | N | N |
| DTXSID1027429 | Cyclododecanol                          | 1724-39-6  | e1k | 200 | 6   | N | N |
| DTXSID1032513 | (3,5-Dimethyl-1H-pyrazol-1-yl)methanol  | 85264-33-1 | e1k | 200 | 1   | N | N |
| DTXSID0048189 | Lauryl gallate                          | 1166-52-5  | e1k | 200 | 87  | Y | N |
| DTXSID1021790 | 2-Nitrophenol                           | 88-75-5    | e1k | 200 | -2  | N | N |
| DTXSID1027390 | Phenolsulfonic acid                     | 1333-39-7  | e1k | 200 | 4   | N | N |
| DTXSID1040792 | Pyridoxine hydrochloride                | 58-56-0    | e1k | 200 | -3  | N | N |
| DTXSID1024049 | Diflubenzuron                           | 35367-38-5 | e1k | 200 | -5  | N | N |
| DTXSID1020190 | C.I. Acid Blue 74                       | 860-22-0   | e1k | 200 | 0   | N | N |
| DTXSID1026879 | Hexamethyleneimine                      | 111-49-9   | e1k | 200 | -5  | N | N |
| DTXSID1029128 | Tetrahydrofurfuryl alcohol              | 97-99-4    | e1k | 200 | 2   | N | N |
| DTXSID1032309 | 2,4-D-Butotyl                           | 1929-73-3  | e1k | 200 | 1   | N | N |
| DTXSID1025726 | 2-Nitroaniline                          | 88-74-4    | e1k | 200 | 2   | N | N |
| DTXSID1021871 | 4-Chlorophenol                          | 106-48-9   | e1k | 200 | 1   | N | N |
| DTXSID1022394 | Biochanin A                             | 491-80-5   | e1k | 200 | 8   | N | N |

|               |                                      |             |     |     |    |   |   |
|---------------|--------------------------------------|-------------|-----|-----|----|---|---|
| DTXSID1024704 | 4-tert-Butyltoluene                  | 98-51-1     | e1k | 200 | -1 | N | N |
| DTXSID1034260 | Oxytetracycline                      | 79-57-2     | e1k | 200 | 40 | N | N |
| DTXSID1038795 | 1,1,1,3,5,5,5-Heptamethyltrisiloxane | 1873-88-7   | e1k | 200 | -6 | N | N |
| DTXSID1022479 | 2-Ethylphenol                        | 90-00-6     | e1k | 200 | -3 | N | N |
| DTXSID1034929 | Spiromesifen                         | 283594-90-1 | e1k | 200 | -1 | N | N |
| DTXSID1024598 | Benzyl salicylate                    | 118-58-1    | e1k | 200 | 8  | N | N |
| DTXSID0048187 | 1-Methoxy-4-tert-pentylcyclohexane   | 199584-38-8 | e1k | 200 | 2  | N | N |
| DTXSID1022055 | tert-Butyl acetate                   | 540-88-5    | e1k | 200 | -3 | N | N |
| DTXSID1026906 | N,N-Dimethyldodecan-1-amine          | 112-18-5    | e1k | 200 | 5  | N | N |
| DTXSID1020516 | 1,1-Dimethylhydrazine                | 57-14-7     | e1k | 200 | -2 | N | N |
| DTXSID1025306 | 5-Ethylidene-2-norbornene            | 16219-75-3  | e1k | 200 | 5  | N | N |
| DTXSID1032511 | 1,3,5-Triethylhexahydro-s-triazine   | 7779-27-3   | e1k | 200 | -4 | N | N |
| DTXSID1022508 | 4-Dodecylphenol                      | 104-43-8    | e1k | 200 | 90 | Y | N |
| DTXSID1040611 | Silwet L 77                          | 27306-78-1  | e1k | 200 | 15 | N | N |
| DTXSID1021031 | 4-Nitrosodiphenylamine               | 156-10-5    | e1k | 200 | -3 | N | N |
| DTXSID1029124 | 1,2,4,5-Tetramethylbenzene           | 95-93-2     | e1k | 200 | -2 | N | N |
| DTXSID1021403 | Trimethyl phosphate                  | 512-56-1    | e1k | 200 | -3 | N | N |
| DTXSID1027550 | Sodium chloroacetate                 | 3926-62-3   | e1k | 200 | -2 | N | N |
| DTXSID1026035 | Sodium 2-mercaptobenzothiolate       | 2492-26-4   | e1k | 200 | -2 | N | N |
| DTXSID1035288 | Codlure                              | 33956-49-9  | e1k | 200 | 0  | N | N |
| DTXSID1032484 | Temephos                             | 3383-96-8   | e1k | 200 | 6  | N | N |
| DTXSID1037565 | Mepronil                             | 55814-41-0  | e1k | 200 | 1  | N | N |
| DTXSID1027134 | Bis(2-ethylhexyl) phosphate          | 298-07-7    | e1k | 200 | 50 | Y | N |
| DTXSID1033371 | Cyclopentanol                        | 96-41-3     | e1k | 200 | -5 | N | N |
| DTXSID1030606 | Acesulfame potassium                 | 55589-62-3  | e1k | 200 | 0  | N | N |
| DTXSID1025809 | Oleic acid                           | 112-80-1    | e1k | 200 | 87 | Y | N |
| DTXSID1026241 | 3,3,5-Trimethylcyclohexyl salicylate | 118-56-9    | e1k | 200 | 27 | N | N |
| DTXSID1027899 | Ammonium xylene sulfonate            | 26447-10-9  | e1k | 200 | -2 | N | N |
| DTXSID0048210 | Phenyl benzoate                      | 93-99-2     | e1k | 200 | 0  | N | N |
| DTXSID1020144 | Benzoin                              | 119-53-9    | e1k | 200 | -1 | N | N |
| DTXSID1024255 | Phenmedipham                         | 13684-63-4  | e1k | 200 | 0  | N | N |

|               |                                              |             |     |     |    |   |   |
|---------------|----------------------------------------------|-------------|-----|-----|----|---|---|
| DTXSID1040110 | Ethyl propionate                             | 105-37-3    | e1k | 200 | 0  | N | N |
| DTXSID1032648 | Z-Tetrachlorvinphos                          | 22248-79-9  | e1k | 200 | -4 | Y | N |
| DTXSID1021243 | Rhodamine 6G                                 | 989-38-8    | e1k | 200 | 23 | N | N |
| DTXSID1024176 | Methacrylonitrile                            | 126-98-7    | e1k | 200 | -2 | N | N |
| DTXSID1033161 | Aldicarb sulfoxide                           | 1646-87-3   | e1k | 200 | 0  | N | N |
| DTXSID0048181 | 4-tert-Butylaniline                          | 769-92-6    | e1k | 200 | -1 | N | N |
| DTXSID0048183 | Enterolactone                                | 78473-71-9  | e1k | 67  | 0  | N | N |
| DTXSID1040372 | Epoxiconazole                                | 133855-98-8 | e1k | 200 | -1 | N | N |
| DTXSID1020352 | Cupferron                                    | 135-20-6    | e1k | 200 | -1 | N | N |
| DTXSID1024124 | hifensulfuron methyl                         | 79277-27-3  | e1k | 200 | 1  | N | N |
| DTXSID1027500 | 2-Propoxyethanol                             | 2807-30-9   | e1k | 200 | -1 | N | N |
| DTXSID1042154 | Methyl red                                   | 493-52-7    | e1k | 200 | 19 | N | N |
| DTXSID2027412 | 3,6,9,12-Tetraoxahexadecan-1-ol              | 1559-34-8   | e1k | 200 | 5  | N | N |
| DTXSID1044693 | Magnesium dibenzoate                         | 553-70-8    | e1k | 200 | 5  | N | N |
| DTXSID2025478 | Isopropyl acetate                            | 108-21-4    | e1k | 200 | 2  | N | N |
| DTXSID2022048 | Flavone                                      | 525-82-6    | e1k | 198 | 11 | N | N |
| DTXSID1040794 | Sodium 2-phenylphenate tetrahydrate          | 6152-33-6   | e1k | 204 | 11 | N | N |
| DTXSID1048122 | Benzyl-C8-18-alkyldimethylammonium chlorides | 63449-41-2  | e1k | 200 | 89 | Y | N |
| DTXSID2032558 | Kresoxim-methyl                              | 143390-89-0 | e1k | 200 | 3  | N | N |
| DTXSID2025347 | Furfuryl alcohol                             | 98-00-0     | e1k | 198 | -1 | N | N |
| DTXSID2027333 | 3-Aminopropyltriethoxysilane                 | 919-30-2    | e1k | 200 | -4 | N | N |
| DTXSID1041267 | 1-Ethoxy-2-propanol                          | 1569-02-4   | e1k | 200 | 11 | N | N |
| DTXSID1047497 | Octyl decyl phthalate                        | 119-07-3    | e1k | 200 | 8  | N | N |
| DTXSID1041421 | 5,7-Dimethoxy-2H-chromen-2-one               | 487-06-9    | e1k | 200 | -1 | N | N |
| DTXSID2034700 | MCPA-sodium                                  | 3653-48-3   | e1k | 200 | 0  | N | N |
| DTXSID1041425 | (2E)-2-Hexenal                               | 6728-26-3   | e1k | 200 | 0  | N | N |
| DTXSID1041346 | 2,4-D-ethyl ester                            | 533-23-3    | e1k | 200 | 1  | N | N |
| DTXSID2027094 | Bis(2-ethylhexyl) maleate                    | 142-16-5    | e1k | 200 | 11 | N | N |
| DTXSID1048203 | Ethyl 4-chlorophenyl ketone                  | 6285-05-8   | e1k | 200 | 5  | N | N |
| DTXSID2025688 | Morpholine                                   | 110-91-8    | e1k | 200 | -3 | N | N |

|               |                                                  |             |     |     |    |   |   |
|---------------|--------------------------------------------------|-------------|-----|-----|----|---|---|
| DTXSID2021739 | 1-Propanol                                       | 71-23-8     | e1k | 200 | 4  | N | N |
| DTXSID1041978 | Flufenoxuron                                     | 101463-69-8 | e1k | 200 | 5  | N | N |
| DTXSID2029298 | Sodium lauryl polyoxyethylene ether sulfate      | 9004-82-4   | e1k | 200 | 82 | Y | N |
| DTXSID2025395 | Hexamethyldisilazane                             | 999-97-3    | e1k | 200 | -5 | N | N |
| DTXSID1041550 | (S)-(-)-beta-Citronellol                         | 7540-51-4   | e1k | 200 | 7  | N | N |
| DTXSID2020212 | 2-tert-Butyl-4-methylphenol                      | 2409-55-4   | e1k | 200 | 15 | N | N |
| DTXSID2027414 | 2,3-Dihydro-2,2-dimethyl-7-benzofuranol          | 1563-38-8   | e1k | 200 | -2 | N | N |
| DTXSID2022678 | Bicalutamide                                     | 90357-06-5  | e1k | 116 | -1 | N | N |
| DTXSID2022123 | 2-Hydroxyethyl acrylate                          | 818-61-1    | e1k | 200 | -3 | N | N |
| DTXSID2026238 | Trimethylamine                                   | 75-50-3     | e1k | 200 | -5 | N | N |
| DTXSID1041265 | 2-Hexyl-1-decanol                                | 2425-77-6   | e1k | 200 | 15 | N | N |
| DTXSID2029167 | Metam-sodium                                     | 137-42-8    | e1k | 200 | 19 | N | N |
| DTXSID2021602 | Hexadecanoic acid                                | 57-10-3     | e1k | 200 | 57 | Y | N |
| DTXSID2022628 | Atenolol                                         | 29122-68-7  | e1k | 200 | 4  | N | N |
| DTXSID1048201 | Cyclobutyl phenyl ketone                         | 5407-98-7   | e1k | 200 | 8  | N | N |
| DTXSID2027963 | Isooctadecanoic acid                             | 30399-84-9  | e1k | 200 | 94 | Y | N |
| DTXSID2024664 | Butanal oxime                                    | 110-69-0    | e1k | 200 | -6 | N | N |
| DTXSID1041184 | (-)-beta-Pinene                                  | 18172-67-3  | e1k | 200 | -1 | N | N |
| DTXSID1041970 | Fenchol                                          | 1632-73-1   | e1k | 200 | -1 | N | N |
| DTXSID2029290 | (1S,5S) 2,6,6-Trimethyl-Bicyclo(3.1.1)hept-2-ene | 7785-26-4   | e1k | 200 | 0  | N | N |
| DTXSID2029616 | Imidazole                                        | 288-32-4    | e1k | 200 | -7 | N | N |
| DTXSID1041188 | (2-Nitro-1-propenyl)benzene                      | 705-60-2    | e1k | 200 | 2  | N | N |
| DTXSID2023193 | Lactose                                          | 63-42-3     | e1k | 200 | -1 | N | N |
| DTXSID2032348 | Chlorophacinone                                  | 3691-35-8   | e1k | 200 | 25 | N | N |
| DTXSID2021997 | 1-(2-Aminoethyl)piperazine                       | 140-31-8    | e1k | 200 | -8 | N | N |
| DTXSID1048207 | Diphenyl phosphate                               | 838-85-7    | e1k | 200 | -1 | N | N |
| DTXSID1041920 | 2-(2-Ethylhexyloxy)ethanol                       | 1559-35-9   | e1k | 200 | 21 | N | N |
| DTXSID2025050 | Diethylenetriamine                               | 111-40-0    | e1k | 200 | 2  | N | N |

|               |                                 |            |     |     |    |   |   |
|---------------|---------------------------------|------------|-----|-----|----|---|---|
| DTXSID2029325 | Methyl dihydrojasmonate         | 24851-98-7 | e1k | 200 | 4  | N | N |
| DTXSID2024666 | 1,4-Butanediol                  | 110-63-4   | e1k | 200 | 3  | N | N |
| DTXSID2023723 | Tromethamine                    | 77-86-1    | e1k | 200 | -1 | N | N |
| DTXSID2020929 | Niacinamide                     | 98-92-0    | e1k | 210 | -4 | N | N |
| DTXSID2022171 | 1-Decanamine                    | 2016-57-1  | e1k | 200 | -3 | N | N |
| DTXSID2025892 | N-Phenyl-1-naphthylamine        | 90-30-2    | e1k | 200 | 14 | N | N |
| DTXSID2026496 | alpha-Terpinyl acetate          | 80-26-2    | e1k | 200 | -8 | N | N |
| DTXSID1041639 | Sodium m-xylene-4-sulfonate     | 827-21-4   | e1k | 200 | 0  | N | N |
| DTXSID2025505 | Linoleic acid                   | 60-33-3    | e1k | 200 | 29 | Y | N |
| DTXSID2034598 | Fenoxaprop-P-ethyl              | 71283-80-2 | e1k | 200 | 4  | N | N |
| DTXSID2025216 | Divinylbenzene                  | 1321-74-0  | e1k | 200 | -6 | N | N |
| DTXSID2026789 | Propylene carbonate             | 108-32-7   | e1k | 200 | 1  | N | N |
| DTXSID1044487 | Methyltrioctylammonium chloride | 5137-55-3  | e1k | 200 | 96 | Y | N |
| DTXSID2027466 | ECC                             | 2386-87-0  | e1k | 200 | -3 | N | N |
| DTXSID2027258 | Isopropyl formate               | 625-55-8   | e1k | 200 | 2  | N | N |
| DTXSID2021943 | 2-Undecanone                    | 112-12-9   | e1k | 203 | 4  | N | N |
| DTXSID2023430 | Pentaerythritol tetranitrate    | 78-11-5    | e1k | 200 | -5 | N | N |
| DTXSID2026997 | 4-Methoxybenzaldehyde           | 123-11-5   | e1k | 200 | 4  | N | N |
| DTXSID2025135 | 1,3-Dimethyl-4-nitrobenzene     | 89-87-2    | e1k | 200 | 5  | N | N |
| DTXSID1044435 | Procaine hydrochloride          | 51-05-8    | e1k | 200 | 5  | N | N |
| DTXSID2032639 | Pyridate                        | 55512-33-9 | e1k | 200 | 10 | N | N |
| DTXSID1048209 | tert-Butyl phenyl ketone        | 938-16-9   | e1k | 200 | 5  | N | N |
| DTXSID1041891 | Diphenylmethane                 | 101-81-5   | e1k | 200 | 4  | N | N |
| DTXSID2021735 | Dimethyl sulfoxide              | 67-68-5    | e1k | 200 | -4 | N | N |
| DTXSID2029612 | Limonene                        | 138-86-3   | e1k | 206 | -1 | N | N |
| DTXSID1042491 | Triethoxypentylsilane           | 2761-24-2  | e1k | 200 | 12 | N | N |
| DTXSID2042060 | Isoborneol                      | 124-76-5   | e1k | 200 | 12 | N | N |
| DTXSID3032412 | Imazamethabenz                  | 81405-85-8 | e1k | 200 | 7  | N | N |
| DTXSID2041252 | 1,4-Diaminoanthraquinone        | 128-95-0   | e1k | 200 | 20 | Y | N |
| DTXSID2040151 | Imidazolidinyl urea             | 39236-46-9 | e1k | 200 | 9  | N | N |
| DTXSID3021483 | Phenylacetaldehyde              | 122-78-1   | e1k | 200 | 29 | N | N |

|               |                                                            |            |     |              |    |   |   |
|---------------|------------------------------------------------------------|------------|-----|--------------|----|---|---|
| DTXSID2036588 | Polyoxyethylene(10)nonylphenyl ether                       | 26027-38-3 | e1k | 200          | 21 | N | N |
| DTXSID2041200 | N,N'-Disalicylidene-1,2-diaminopropane                     | 94-91-7    | e1k | 200          | 40 | N | N |
| DTXSID2041389 | 2'-Acetonaphthone                                          | 93-08-3    | e1k | 200          | -5 | N | N |
| DTXSID2042191 | N,N'-Dimethylthiourea                                      | 534-13-4   | e1k | 200          | 4  | N | N |
| DTXSID3038696 | Ethyl benzoate                                             | 93-89-0    | e1k | 200          | 16 | N | N |
| DTXSID3024528 | Anise oil                                                  | 8007-70-3  | e1k | 200<br>µg/ml | 17 | N | N |
| DTXSID3034583 | Ethyl 1-naphthaleneacetate                                 | 2122-70-5  | e1k | 200          | 9  | N | N |
| DTXSID2044553 | Sodium 2-methylbenzenesulfonate                            | 15046-75-0 | e1k | 200          | 1  | N | N |
| DTXSID3021356 | dl-alpha-Tocopheryl acetate                                | 52225-20-4 | e1k | 200          | 8  | N | N |
| DTXSID2041703 | Butylnaphthalenesulfonic acid sodium salt                  | 25638-17-9 | e1k | 200          | 12 | N | N |
| DTXSID3021770 | 2,2',6,6'-Tetrachlorobisphenol A                           | 79-95-8    | e1k | 200          | 62 | Y | N |
| DTXSID3038808 | 1,3,5,7-Tetramethyl-1,3,5,7-tetravinylcyclotetrasiloxane   | 2554-06-5  | e1k | 200          | 19 | N | N |
| DTXSID2042276 | o-Ethoxyphenol                                             | 94-71-3    | e1k | 200          | 17 | N | N |
| DTXSID3027877 | Diisodecylphenyl phosphite                                 | 25550-98-5 | e1k | 200          | 21 | N | N |
| DTXSID3037541 | Endosulfan sulfate                                         | 1031-07-8  | e1k | 200          | 27 | N | N |
| DTXSID2041208 | Decyl beta-D-glucopyranoside                               | 58846-77-8 | e1k | 200          | 6  | N | N |
| DTXSID3026641 | 1,3-Benzenedicarbonyl dichloride                           | 99-63-8    | e1k | 200          | 6  | N | N |
| DTXSID2047517 | Hexanedioic acid, di-C7-9-branched and linear alkyl esters | 68515-75-3 | e1k | 200          | 4  | N | N |
| DTXSID3020093 | 4-Methoxyaniline hydrochloride                             | 20265-97-8 | e1k | 200          | 11 | N | N |
| DTXSID3020889 | 4-Methylstyrene                                            | 622-97-9   | e1k | 200          | -4 | N | N |
| DTXSID3020091 | Aniline hydrochloride                                      | 142-04-1   | e1k | 200          | 4  | N | N |
| DTXSID3034531 | Thiophanate                                                | 23564-06-9 | e1k | 200          | -8 | N | N |
| DTXSID3020625 | Finasteride                                                | 98319-26-7 | e1k | 200          | 10 | N | N |
| DTXSID2044713 | Acid Red 337                                               | 67786-14-5 | e1k | 200          | 51 | Y | N |
| DTXSID3027875 | Glyceryl monooleate                                        | 25496-72-4 | e1k | 200          | 62 | Y | N |
| DTXSID2036112 | 2-(8-Heptadecenyl)-2-imidazoline-1-ethanol                 | 95-38-5    | e1k | 200          | 91 | Y | N |



|               |                                        |             |     |              |     |   |   |
|---------------|----------------------------------------|-------------|-----|--------------|-----|---|---|
| DTXSID3020043 | Allantoin                              | 97-59-6     | e1k | 200          | -2  | N | N |
| DTXSID3026647 | 4-Hydroxybenzoic acid                  | 99-96-7     | e1k | 200          | -1  | N | N |
| DTXSID2044391 | 2-Isopropylphenol                      | 88-69-7     | e1k | 200          | 2   | N | N |
| DTXSID3020415 | 1,2-Dibromoethane                      | 106-93-4    | e1k | 202          | -13 | N | N |
| DTXSID3026566 | Dimethyl hexahydroterephthalate        | 94-60-0     | e1k | 200          | -3  | N | N |
| DTXSID3036105 | 2-tert-Butylcyclohexyl acetate         | 88-41-5     | e1k | 200          | 7   | N | N |
| DTXSID2041250 | 1,4-Bis(N-isopropylamino)anthraquinone | 14233-37-5  | e1k | 106          | 4   | N | N |
| DTXSID3036286 | Citralva                               | 5146-66-7   | e1k | 206          | 15  | N | N |
| DTXSID3021726 | Salicylamide                           | 65-45-2     | e1k | 200          | -7  | N | N |
| DTXSID3021853 | 1-Piperazineethanol                    | 103-76-4    | e1k | 203          | 3   | N | N |
| DTXSID3022409 | 4,4'-Sulfonyldiphenol                  | 80-09-1     | e1k | 200          | 0   | N | N |
| DTXSID3021518 | Fumaric acid                           | 110-17-8    | e1k | 200          | -8  | N | N |
| DTXSID2047696 | Cremophor EL                           | 61791-12-6  | e1k | 200<br>µg/ml | 4   | N | N |
| DTXSID3029154 | Cyclopentanone                         | 120-92-3    | e1k | 200          | 7   | N | N |
| DTXSID2038788 | 1,4-Cyclohexanedicarboxylic acid       | 1076-97-7   | e1k | 200          | -8  | N | N |
| DTXSID3036288 | 2-Octyl-1-dodecanol                    | 5333-42-6   | e1k | 200          | 6   | N | N |
| DTXSID3022405 | 2-Hydroxy-4-methoxybenzophenone        | 131-57-7    | e1k | 200          | 14  | N | N |
| DTXSID3020047 | Allyl isothiocyanate                   | 57-06-7     | e1k | 206          | -5  | N | N |
| DTXSID3020673 | FD&C Green No. 3                       | 2353-45-9   | e1k | 132          | 83  | Y | N |
| DTXSID2042062 | Isobornyl propanoate                   | 2756-56-1   | e1k | 197          | 2   | N | N |
| DTXSID3021980 | Ethyl hexanoate                        | 123-66-0    | e1k | 200          | -16 | N | N |
| DTXSID3034614 | Flucarbazono-sodium                    | 181274-17-9 | e1k | 187          | 1   | N | N |
| DTXSID3035214 | 1-Octen-3-ol                           | 3391-86-4   | e1k | 200          | -3  | N | N |
| DTXSID3026514 | Phthalimide                            | 85-41-6     | e1k | 200          | -12 | N | N |
| DTXSID3024994 | Sodium dichloroisocyanurate            | 2893-78-9   | e1k | 200          | 1   | N | N |
| DTXSID3029572 | Benoxacor                              | 98730-04-2  | e1k | 200          | -1  | N | N |
| DTXSID2041709 | C.I. Acid Orange 8, monosodium salt    | 5850-86-2   | e1k | 200          | 44  | N | N |
| DTXSID3040776 | Morin hydrate                          | 654055-01-3 | e1k | 200          | 29  | Y | N |
| DTXSID2040731 | Diisopropyl phthalate                  | 605-45-8    | e1k | 200          | 2   | N | N |

|               |                                        |             |     |     |    |   |   |
|---------------|----------------------------------------|-------------|-----|-----|----|---|---|
| DTXSID3022247 | Nerolidol                              | 7212-44-4   | e1k | 200 | 18 | N | N |
| DTXSID3032389 | Farnesol                               | 4602-84-0   | e1k | 200 | 27 | N | N |
| DTXSID3020621 | Fenvalerate                            | 51630-58-1  | e1k | 200 | -9 | N | N |
| DTXSID3026065 | Sulfan blue                            | 129-17-9    | e1k | 200 | 15 | N | N |
| DTXSID3022320 | Triphenylethylene                      | 58-72-0     | e1k | 200 | 5  | N | N |
| DTXSID3032591 | 1-Bromo-3-chloro-5,5-dimethylhydantoin | 16079-88-2  | e1k | 200 | 0  | N | N |
| DTXSID3040352 | Dinocap                                | 39300-45-3  | e1k | 200 | 88 | Y | N |
| DTXSID2042436 | Sulisobenzone                          | 4065-45-6   | e1k | 200 | -3 | N | N |
| DTXSID3032416 | Cybutryne                              | 28159-98-0  | e1k | 200 | 13 | N | N |
| DTXSID3024944 | 1,2-Dibromo-2,4-dicyanobutane          | 35691-65-7  | e1k | 200 | 7  | N | N |
| DTXSID4025080 | Diisobutyl ketone                      | 108-83-8    | e1k | 200 | 6  | N | N |
| DTXSID3047180 | Triisodecyl trimellitate               | 36631-30-8  | e1k | 163 | 7  | N | N |
| DTXSID4027282 | Phenyl phosphorus dichloride           | 644-97-3    | e1k | 200 | 3  | N | N |
| DTXSID4027527 | 1,2,5,6,9,10-Hexabromocyclododecane    | 3194-55-6   | e1k | 174 | 9  | N | N |
| DTXSID3041877 | Dimethylbenzylcarbinyl acetate         | 151-05-3    | e1k | 200 | -6 | N | N |
| DTXSID4020292 | Chloroacetaldehyde                     | 107-20-0    | e1k | 200 | 5  | N | N |
| DTXSID4020618 | Fadrozole hydrochloride                | 102676-31-3 | e1k | 100 | 3  | N | N |
| DTXSID4036435 | 1-Octyl-2-pyrrolidone                  | 2687-94-7   | e1k | 200 | 12 | N | N |
| DTXSID4022523 | Heptylparaben                          | 1085-12-7   | e1k | 200 | 82 | Y | N |
| DTXSID4025296 | 2-Ethyl-2-hexenal                      | 645-62-5    | e1k | 200 | 3  | N | N |
| DTXSID4027153 | 1-Bromo-4-fluorobenzene                | 460-00-4    | e1k | 200 | 3  | N | N |
| DTXSID3041794 | Cloquintocet-mexyl                     | 99607-70-2  | e1k | 200 | 7  | N | N |
| DTXSID3042130 | Diphenylmercury(II)                    | 587-85-9    | e1k | 200 | 9  | N | N |
| DTXSID4029692 | Potassium nitrate                      | 7757-79-1   | e1k | 200 | 7  | N | N |
| DTXSID3041247 | 1,3-Diphenyl-1,3-propanedione          | 120-46-7    | e1k | 200 | 16 | N | N |
| DTXSID4020664 | 3-Chloro-1,2-propanediol               | 96-24-2     | e1k | 200 | 7  | N | N |
| DTXSID4026769 | Hexamethyldisiloxane                   | 107-46-0    | e1k | 200 | 0  | N | N |
| DTXSID4027997 | Dichlormid                             | 37764-25-3  | e1k | 200 | 1  | N | N |
| DTXSID4021391 | Tris(methylphenyl) phosphate           | 1330-78-5   | e1k | 200 | 3  | N | N |
| DTXSID4023202 | Letrozole                              | 112809-51-5 | e1k | 142 | 6  | N | N |

|               |                                                     |             |     |      |     |   |   |
|---------------|-----------------------------------------------------|-------------|-----|------|-----|---|---|
| DTXSID4022109 | gamma-Decanolactone                                 | 706-14-9    | e1k | 204  | 1   | N | N |
| DTXSID3044833 | Terpinyl propionate                                 | 80-27-3     | e1k | 200  | 4   | N | N |
| DTXSID3041530 | 7-Ethyl-2-methyl-4-undecanolsulfate, sodium salt    | 139-88-8    | e1k | 200  | 4   | N | N |
| DTXSID3041663 | Benzyl cinnamate                                    | 103-41-3    | e1k | 200  | 10  | N | N |
| DTXSID4036229 | Sodium decyl sulfate                                | 142-87-0    | e1k | 200  | 6   | N | N |
| DTXSID4035708 | Methylbenzethonium chloride                         | 25155-18-4  | e1k | 1000 | 103 | Y | N |
| DTXSID3041954 | 3-Octanone                                          | 106-68-3    | e1k | 202  | -1  | N | N |
| DTXSID4020870 | 2,2'-Methylenebis(4-methyl-6-tert-butylphenol)      | 119-47-1    | e1k | 200  | 72  | Y | N |
| DTXSID4025612 | 2-Methylpentanedinitrile                            | 4553-62-2   | e1k | 200  | 3   | N | N |
| DTXSID4027076 | Dodecyl sulfate triethanolamine                     | 139-96-8    | e1k | 200  | 61  | Y | N |
| DTXSID4025292 | 2-Ethyl-1,3-hexanediol                              | 94-96-2     | e1k | 200  | 1   | N | N |
| DTXSID4022525 | 2-Ethylhexylparaben                                 | 5153-25-3   | e1k | 200  | 85  | Y | N |
| DTXSID4034576 | 2-Bromo-4-hydroxyacetophenone                       | 2491-38-5   | e1k | 200  | 3   | N | N |
| DTXSID3047473 | Polymethylene polyphenyl isocyanate                 | 9016-87-9   | e1k | 200  | -2  | N | N |
| DTXSID3041611 | Ascorbyl palmitate                                  | 137-66-6    | e1k | 200  | 63  | Y | N |
| DTXSID3041299 | Dihydrojasmane lactone                              | 7011-83-8   | e1k | 200  | 4   | N | N |
| DTXSID4021977 | 4-Ethylphenol                                       | 123-07-9    | e1k | 202  | -1  | N | N |
| DTXSID3042394 | Sodium 1-naphthalenesulfonate                       | 130-14-3    | e1k | 200  | -3  | N | N |
| DTXSID3041409 | 2-Chloro-N-phenylacetamide                          | 587-65-5    | e1k | 200  | 5   | Y | N |
| DTXSID4024193 | MCPB                                                | 94-81-5     | e1k | 200  | -2  | N | N |
| DTXSID4020828 | 4-Methoxyphenol                                     | 150-76-5    | e1k | 200  | 3   | N | N |
| DTXSID3042007 | Glyceryl monoricinoleate                            | 1323-38-2   | e1k | 200  | 23  | N | N |
| DTXSID4032619 | Halofenozide                                        | 112226-61-6 | e1k | 200  | 0   | N | N |
| DTXSID4021921 | 2-Butyne-1,4-diol                                   | 110-65-6    | e1k | 200  | -4  | N | N |
| DTXSID3047425 | 4-Butylphenol                                       | 1638-22-8   | e1k | 200  | 11  | Y | N |
| DTXSID3047633 | Ethyl oleate                                        | 111-62-6    | e1k | 200  | -1  | N | N |
| DTXSID4029698 | Sodium persulfate                                   | 7775-27-1   | e1k | 200  | -2  | N | N |
| DTXSID4029565 | Phthalic acid, diundecyl ester, branched and linear | 85507-79-5  | e1k | 200  | 0   | N | N |

|               |                                 |             |     |              |    |   |   |
|---------------|---------------------------------|-------------|-----|--------------|----|---|---|
| DTXSID4020616 | 1,8-Cineol                      | 470-82-6    | e1k | 200          | 1  | N | N |
| DTXSID4024721 | D-Camphor                       | 464-49-3    | e1k | 200          | 1  | N | N |
| DTXSID4034497 | Metconazole                     | 125116-23-6 | e1k | 200          | 2  | N | N |
| DTXSID4025662 | Methyl styryl ketone            | 122-57-6    | e1k | 200          | 5  | N | N |
| DTXSID4022446 | 2,2'-Bisphenol F                | 2467-02-9   | e1k | 1000         | 25 | N | N |
| DTXSID4026501 | alpha-Pinene                    | 80-56-8     | e1k | 200          | -1 | N | N |
| DTXSID4027072 | Sodium phenolate                | 139-02-6    | e1k | 200          | 1  | N | N |
| DTXSID3041293 | 2-((Dimethylamino)methyl)phenol | 120-65-0    | e1k | 200          | -5 | N | N |
| DTXSID4020379 | Dehydroepiandrosterone          | 53-43-0     | e1k | 200          | 3  | N | N |
| DTXSID4021553 | Decanal                         | 112-31-2    | e1k | 200          | -1 | N | N |
| DTXSID3041661 | 2-Hydroxybenzoxitrile           | 611-20-1    | e1k | 200          | 1  | N | N |
| DTXSID3041790 | Citronellal                     | 106-23-0    | e1k | 200          | 1  | N | N |
| DTXSID4029353 | Acetyl cedrene                  | 32388-55-9  | e1k | 200          | 26 | N | N |
| DTXSID4027868 | tert-Nonanethiol                | 25360-10-5  | e1k | 200          | 2  | N | N |
| DTXSID4027656 | 2-Ethylhexyl thioglycolate      | 7659-86-1   | e1k | 200          | 1  | N | N |
| DTXSID4024274 | Propachlor                      | 1918-16-7   | e1k | 200          | -2 | N | N |
| DTXSID4026842 | Methyl decanoate                | 110-42-9    | e1k | 200          | 1  | N | N |
| DTXSID3047712 | Cornmint oil                    | 68917-18-0  | e1k | 200<br>µg/ml | 3  | N | N |
| DTXSID4021006 | N-Nitroso-N-methylurea          | 684-93-5    | e1k | 200          | 2  | N | N |
| DTXSID4027496 | 2,4-D sodium salt               | 2702-72-9   | e1k | 200          | 1  | N | N |
| DTXSID4022288 | 4-Hexyloxyaniline               | 39905-57-2  | e1k | 200          | 6  | N | N |
| DTXSID4027525 | Potassium 2-ethylhexanoate      | 3164-85-0   | e1k | 200          | 3  | N | N |
| DTXSID4021842 | Cyclohexanone oxime             | 100-64-1    | e1k | 200          | 1  | N | N |
| DTXSID4034601 | (2R,6S)-Fenpropimorph           | 67564-91-4  | e1k | 200          | 29 | N | N |
| DTXSID5022510 | 4-Chloro-2-methylphenol         | 1570-64-5   | e1k | 200          | 5  | N | N |
| DTXSID4048199 | 4-Butyloxyaniline               | 4344-55-2   | e1k | 200          | -1 | N | N |
| DTXSID5032579 | Triclopyr butotyl               | 64700-56-7  | e1k | 200          | 10 | N | N |
| DTXSID5020029 | Acrylonitrile                   | 107-13-1    | e1k | 200          | 5  | Y | N |
| DTXSID5023875 | Ammonium sulfamate              | 7773-06-0   | e1k | 200          | -8 | N | N |
| DTXSID5021758 | Tris(2-butoxyethyl) phosphate   | 78-51-3     | e1k | 200          | 4  | N | N |

|               |                                         |            |     |     |     |   |   |
|---------------|-----------------------------------------|------------|-----|-----|-----|---|---|
| DTXSID4044828 | Ethyl undec-10-enoate                   | 692-86-4   | e1k | 200 | 16  | N | N |
| DTXSID4041442 | Sodium 2-naphthalenesulfonate           | 532-02-5   | e1k | 200 | 10  | N | N |
| DTXSID4047127 | 4-(tert-Pentyl)-cyclohexanone           | 16587-71-6 | e1k | 200 | 2   | N | N |
| DTXSID5032654 | Triforine                               | 26644-46-2 | e1k | 200 | 0   | N | N |
| DTXSID4048193 | 4,4'-Di-tert-butylbiphenyl              | 1625-91-8  | e1k | 200 | 6   | Y | N |
| DTXSID5029217 | 1-Propoxy-2-propanol                    | 1569-01-3  | e1k | 200 | 0   | N | N |
| DTXSID4038924 | Hexyl salicylate                        | 6259-76-3  | e1k | 200 | 29  | N | N |
| DTXSID5027142 | 1,2-Dichloro-4-(trifluoromethyl)benzene | 328-84-7   | e1k | 200 | 4   | N | N |
| DTXSID5025021 | Dicyclohexyl phthalate                  | 84-61-7    | e1k | 209 | 4   | N | N |
| DTXSID5024263 | Phosphoric acid                         | 7664-38-2  | e1k | 200 | -12 | N | N |
| DTXSID5024681 | tert-Butylamine                         | 75-64-9    | e1k | 200 | 3   | N | N |
| DTXSID5020106 | L-Ascorbic acid                         | 50-81-7    | e1k | 200 | -6  | N | N |
| DTXSID4042096 | L-Glucitol                              | 6706-59-8  | e1k | 200 | -1  | N | N |
| DTXSID5020233 | Ergocalciferol                          | 50-14-6    | e1k | 200 | 34  | N | N |
| DTXSID5027356 | Tris(2-methoxyethoxy)vinylsilane        | 1067-53-4  | e1k | 200 | 9   | N | N |
| DTXSID4040343 | Benzyl bromoacetate                     | 5437-45-6  | e1k | 200 | 1   | N | N |
| DTXSID5022489 | E-Cinnamic acid                         | 140-10-3   | e1k | 200 | 4   | N | N |
| DTXSID5026461 | 2-Methylpropanenitrile                  | 78-82-0    | e1k | 200 | -12 | N | N |
| DTXSID4040711 | Ethyl 2-methylbenzoate                  | 87-24-1    | e1k | 200 | -5  | N | N |
| DTXSID5020443 | 2,4-D Butyl ester                       | 94-80-4    | e1k | 200 | -2  | N | N |
| DTXSID5024922 | 1,6-Hexanediamine                       | 124-09-4   | e1k | 200 | -4  | N | N |
| DTXSID4042094 | Levomenol                               | 23089-26-1 | e1k | 200 | 28  | N | N |
| DTXSID4041818 | 2-sec-Butylcyclohexanone                | 14765-30-1 | e1k | 200 | 0   | N | N |
| DTXSID5026251 | Triphenylphosphine                      | 603-35-0   | e1k | 200 | -3  | N | N |
| DTXSID5021415 | Triisopropanolamine                     | 122-20-3   | e1k | 200 | 1   | N | N |
| DTXSID5034981 | Tributyltin benzoate                    | 4342-36-3  | e1k | 200 | 13  | Y | N |
| DTXSID5024057 | Dimethylamine                           | 124-40-3   | e1k | 200 | -7  | N | N |
| DTXSID5027304 | Dimethyltin dichloride                  | 753-73-1   | e1k | 200 | -5  | N | N |
| DTXSID5025023 | Dicyclopentadiene                       | 77-73-6    | e1k | 197 | -12 | N | N |
| DTXSID5021968 | 3-Ethoxy-4-hydroxybenzaldehyde          | 121-32-4   | e1k | 200 | 1   | N | N |

|               |                                                    |             |     |     |     |   |   |
|---------------|----------------------------------------------------|-------------|-----|-----|-----|---|---|
| DTXSID5026623 | 4-tert-Butylcyclohexanol                           | 98-52-2     | e1k | 200 | -3  | N | N |
| DTXSID5026548 | 2,4,6-Tris(dimethylaminomethyl)phenol              | 90-72-2     | e1k | 200 | 0   | N | N |
| DTXSID4041440 | 2-Methylbutyl isovalerate                          | 2445-77-4   | e1k | 200 | 3   | N | N |
| DTXSID4041232 | 1,3,5-Triisopropylbenzene                          | 717-74-8    | e1k | 200 | 12  | N | N |
| DTXSID4047597 | Poloxalene                                         | 9003-11-6   | e1k | 200 | -3  | N | N |
| DTXSID5027774 | Ethylenediaminetetraacetic acid ferric sodium salt | 15708-41-5  | e1k | 200 | 24  | N | N |
| DTXSID5021413 | Tris(2,3-dibromopropyl) phosphate                  | 126-72-7    | e1k | 174 | 13  | N | N |
| DTXSID4047882 | Phenylparaben                                      | 17696-62-7  | e1k | 200 | 5   | N | N |
| DTXSID4041604 | Pentyl butyrate                                    | 540-18-1    | e1k | 200 | -7  | N | N |
| DTXSID5020499 | N,N-Dimethylacetamide                              | 127-19-5    | e1k | 200 | -8  | N | N |
| DTXSID5023588 | D-Glucitol                                         | 50-70-4     | e1k | 193 | 14  | N | N |
| DTXSID5021251 | Saccharin                                          | 81-07-2     | e1k | 200 | 1   | N | N |
| DTXSID5021916 | 2-Heptanone                                        | 110-43-0    | e1k | 200 | -8  | N | N |
| DTXSID5027770 | 2-Acrylamido-2-methyl-1-propanesulfonic acid       | 15214-89-8  | e1k | 200 | 3   | N | N |
| DTXSID5026259 | Tris(2-chloroisopropyl)phosphate                   | 13674-84-5  | e1k | 190 | -3  | N | N |
| DTXSID5022934 | Digoxin                                            | 20830-75-5  | e1k | 135 | -8  | N | N |
| DTXSID4044537 | Sodium triisopropyl naphthalene sulfonate          | 1323-19-9   | e1k | 200 | 49  | N | N |
| DTXSID4042418 | Sodium tridecyl sulfate                            | 3026-63-9   | e1k | 200 | 95  | Y | N |
| DTXSID5026912 | 2-[2-(2-Methoxyethoxy)ethoxy]ethanol               | 112-35-6    | e1k | 200 | -8  | N | N |
| DTXSID5034357 | Lufenuron                                          | 103055-07-8 | e1k | 200 | 11  | N | N |
| DTXSID5022437 | Nordihydroguaiaretic acid                          | 500-38-9    | e1k | 200 | 13  | Y | N |
| DTXSID5021388 | 2,4,5-Trichlorophenoxyacetic acid                  | 93-76-5     | e1k | 200 | -3  | N | N |
| DTXSID4041492 | 3-Phenylhexane                                     | 4468-42-2   | e1k | 200 | 3   | N | N |
| DTXSID4048191 | 4,4'-Methylenebis(2,6-diethylaniline)              | 13680-35-8  | e1k | 200 | 3   | N | N |
| DTXSID5028665 | DINP branched                                      | 68515-48-0  | e1k | 200 | -11 | N | N |
| DTXSID5021590 | Dodecanoic acid                                    | 143-07-7    | e1k | 200 | 0   | N | N |
| DTXSID5026706 | 1,2-Diphenoxyethane                                | 104-66-5    | e1k | 200 | -2  | N | N |

|               |                                          |            |     |     |    |   |   |
|---------------|------------------------------------------|------------|-----|-----|----|---|---|
| DTXSID5032315 | 4,5-Dichloro-2-octyl-3(2H)-isothiazolone | 64359-81-5 | e1k | 200 | 2  | Y | N |
| DTXSID5025102 | 3-(Dimethylamino)propylamine             | 109-55-7   | e1k | 200 | 2  | N | N |
| DTXSID4048195 | 4-(Hexyloxy)phenol                       | 18979-55-0 | e1k | 200 | 35 | N | N |
| DTXSID4044901 | Triallyl trimellitate                    | 2694-54-4  | e1k | 200 | 5  | N | N |
| DTXSID5020493 | Dimethyl hydrogen phosphite              | 868-85-9   | e1k | 200 | -6 | N | N |
| DTXSID5021914 | 5-Methyl-2-hexanone                      | 110-12-3   | e1k | 200 | -4 | N | N |
| DTXSID4042335 | Butyl (2S)-2-hydroxypropanoate           | 34451-19-9 | e1k | 200 | 5  | N | N |
| DTXSID4041521 | 4-Morpholinepropanamine                  | 123-00-2   | e1k | 200 | 5  | N | N |
| DTXSID4042171 | 4-Dodecylmorpholine                      | 1541-81-7  | e1k | 200 | 19 | Y | N |
| DTXSID5027198 | N-Methylphthalimide                      | 550-44-7   | e1k | 200 | -2 | N | N |
| DTXSID5040700 | Trimethoxyphenylsilane                   | 2996-92-1  | e1k | 200 | 0  | N | N |
| DTXSID6024834 | (2E)-3-Phenylprop-2-enal                 | 14371-10-9 | e1k | 200 | 8  | N | N |
| DTXSID6025141 | 1,3-Dimethylolurea                       | 140-95-4   | e1k | 200 | 5  | N | N |
| DTXSID6023523 | Propofol                                 | 2078-54-8  | e1k | 200 | 13 | N | N |
| DTXSID6021793 | 1-Naphthol                               | 90-15-3    | e1k | 200 | 12 | N | N |
| DTXSID5044815 | Dibutyl nonanedioate                     | 2917-73-9  | e1k | 200 | 5  | N | N |
| DTXSID5048180 | 4-Propylaniline                          | 2696-84-6  | e1k | 200 | 15 | N | N |
| DTXSID5041726 | C.I. Direct Red 81 disodium salt         | 2610-11-9  | e1k | 200 | 97 | Y | N |
| DTXSID6024123 | Haloxypop-methyl                         | 69806-40-2 | e1k | 200 | 11 | N | N |
| DTXSID5042243 | Oleyl sarcosine                          | 110-25-8   | e1k | 200 | 96 | Y | N |
| DTXSID6025018 | Dicyclohexylamine                        | 101-83-7   | e1k | 200 | 8  | N | N |
| DTXSID6021240 | Retinol acetate                          | 127-47-9   | e1k | 200 | 7  | N | N |
| DTXSID6025226 | Econazole nitrate                        | 24169-02-6 | e1k | 200 | 16 | N | N |
| DTXSID5044784 | 1,3-Butyleneglycol dimethacrylate        | 1189-08-8  | e1k | 200 | 1  | N | N |
| DTXSID5041641 | 2,5-Dimethylbenzenesulfonic acid         | 609-54-1   | e1k | 200 | 4  | N | N |
| DTXSID6021082 | C.I. Acid Orange 10                      | 1936-15-8  | e1k | 200 | 7  | N | N |
| DTXSID5044865 | 2,2'-(Tetradecylimino)diethanol          | 18924-66-8 | e1k | 200 | 71 | Y | N |
| DTXSID5048188 | 4-Thiocresol                             | 106-45-6   | e1k | 200 | 15 | N | N |
| DTXSID6023602 | Butanedioic acid                         | 110-15-6   | e1k | 200 | 9  | N | N |

|               |                                           |            |     |              |    |   |   |
|---------------|-------------------------------------------|------------|-----|--------------|----|---|---|
| DTXSID6021113 | Peppermint oil                            | 8006-90-4  | e1k | 200<br>µg/ml | 3  | N | N |
| DTXSID5040708 | 4-Hexylaniline                            | 33228-45-4 | e1k | 200          | 28 | N | N |
| DTXSID6021959 | 2,4,6-Tribromophenol                      | 118-79-6   | e1k | 200          | 4  | N | N |
| DTXSID5041512 | 4-Chlorophenylurea                        | 140-38-5   | e1k | 199          | 0  | N | N |
| DTXSID5047033 | gamma-Cyclodextrin                        | 17465-86-0 | e1k | 79           | -2 | N | N |
| DTXSID5041302 | (Dicyclopentadienyloxy)ethyl methacrylate | 68169-03-9 | e1k | 200          | 6  | N | N |
| DTXSID6024676 | Butyl acrylate                            | 141-32-2   | e1k | 205          | 4  | N | N |
| DTXSID5035589 | Disiquonium chloride                      | 68959-20-6 | e1k | 200          | 64 | Y | N |
| DTXSID6023868 | Hydramethylnon                            | 67485-29-4 | e1k | 200          | 15 | N | N |
| DTXSID5047611 | 1,4-Heptanolide                           | 105-21-5   | e1k | 200          | 0  | N | N |
| DTXSID5048184 | Melengestrol acetate                      | 2919-66-6  | e1k | 126          | 11 | N | N |
| DTXSID5047879 | 2-Hydroxybenzophenone                     | 117-99-7   | e1k | 200          | 2  | N | N |
| DTXSID5035616 | Sodium 2-nitrophenolate                   | 824-39-5   | e1k | 200          | -1 | N | N |
| DTXSID5042299 | 4-Isopropylphenol                         | 99-89-8    | e1k | 200          | -1 | N | N |
| DTXSID5044788 | Naphthalene-2-sulfonic acid               | 120-18-3   | e1k | 200          | -2 | N | N |
| DTXSID6024624 | Bisphenol A diglycidyl ether              | 1675-54-3  | e1k | 200          | 12 | Y | N |
| DTXSID6021907 | Propanedinitrile                          | 109-77-3   | e1k | 200          | 9  | N | N |
| DTXSID6020511 | 3,3'-Dimethylbenzidine dihydrochloride    | 612-82-8   | e1k | 200          | 1  | N | N |
| DTXSID6025220 | 1-Dodecanethiol                           | 112-55-0   | e1k | 200          | 18 | N | N |
| DTXSID5041643 | Sodium 2-formylbenzenesulfonate           | 1008-72-6  | e1k | 200          | 13 | N | N |
| DTXSID6026298 | m-Xylene                                  | 108-38-3   | e1k | 200          | 0  | N | N |
| DTXSID5038830 | 1,1-Dimethyl-2-phenylethyl butanoate      | 10094-34-5 | e1k | 200          | 5  | N | N |
| DTXSID6024046 | Paraoxon                                  | 311-45-5   | e1k | 200          | -1 | N | N |
| DTXSID6025436 | 8-Hydroxyquinoline sulfate                | 134-31-6   | e1k | 200          | 6  | N | N |
| DTXSID5048211 | Ethyl 4-methylbenzoate                    | 94-08-6    | e1k | 200          | 5  | N | N |
| DTXSID6025143 | 2,3-Dimethylphenol                        | 526-75-0   | e1k | 205          | 7  | N | N |
| DTXSID5041516 | 2-Ethyl-3-hydroxy-4H-pyran-4-one          | 4940-11-8  | e1k | 200          | -2 | N | N |
| DTXSID6025272 | Ethyl anthranilate                        | 87-25-2    | e1k | 200          | 4  | N | N |



|               |                                              |             |     |     |    |   |   |
|---------------|----------------------------------------------|-------------|-----|-----|----|---|---|
| DTXSID5047451 | Acid Yellow 11                               | 6359-82-6   | e1k | 200 | 2  | N | N |
| DTXSID5038888 | Basic Blue 7                                 | 2390-60-5   | e1k | 200 | 38 | N | N |
| DTXSID6020197 | Bromocriptine mesylate                       | 22260-51-1  | e1k | 67  | 2  | N | N |
| DTXSID5037494 | Deethylatrazine                              | 6190-65-4   | e1k | 200 | 4  | N | N |
| DTXSID5041275 | 1-Monolaurin                                 | 142-18-7    | e1k | 200 | 8  | N | N |
| DTXSID6022137 | (Z)-3-Hexen-1-ol                             | 928-96-1    | e1k | 200 | 0  | N | N |
| DTXSID5044578 | Sodium 2,5-dimethylbenzenesulfonate          | 827-19-0    | e1k | 200 | 5  | N | N |
| DTXSID5041514 | (4Z)-4-Decenal                               | 21662-09-9  | e1k | 200 | 9  | N | N |
| DTXSID6024200 | m-Cresol                                     | 108-39-4    | e1k | 200 | -1 | N | N |
| DTXSID6020307 | Chloromethyl methyl ether                    | 107-30-2    | e1k | 70  | 5  | N | N |
| DTXSID6022008 | 1-Nonanol                                    | 143-08-8    | e1k | 200 | 9  | N | N |
| DTXSID5044443 | N,N-Dibutyl-N-methylbutan-1-aminium chloride | 56375-79-2  | e1k | 200 | 3  | N | N |
| DTXSID6020278 | 1-Chloro-2,4-dinitrobenzene                  | 97-00-7     | e1k | 200 | 23 | N | N |
| DTXSID5041273 | Pyrazolone T                                 | 118-47-8    | e1k | 200 | 0  | N | N |
| DTXSID5037028 | Hexadecyltrimethylammonium bromide           | 57-09-0     | e1k | 200 | 97 | Y | N |
| DTXSID6021957 | Phenyl salicylate                            | 118-55-8    | e1k | 200 | 3  | N | N |
| DTXSID6021666 | Tetradecanoic acid                           | 544-63-8    | e1k | 200 | 77 | Y | N |
| DTXSID5047796 | Formalin                                     | NOCAS_47796 | e1k | 208 | 9  | N | N |
| DTXSID6023862 | Aldoxycarb                                   | 1646-88-4   | e1k | 200 | 4  | N | N |
| DTXSID6021824 | Dichlorophen                                 | 97-23-4     | e1k | 200 | 51 | Y | N |
| DTXSID5041487 | 3,7-Dimethyloctan-3-yl acetate               | 20780-48-7  | e1k | 200 | 0  | N | N |
| DTXSID6022391 | Apigenin                                     | 520-36-5    | e1k | 200 | 6  | N | N |
| DTXSID6026080 | Terephthalic acid                            | 100-21-0    | e1k | 200 | 0  | N | N |
| DTXSID6020014 | Dehydroacetic acid                           | 520-45-6    | e1k | 200 | 8  | N | N |
| DTXSID6032516 | 2-Hydroxyethyl octyl sulfide                 | 3547-33-9   | e1k | 200 | 21 | N | N |
| DTXSID6041682 | Bromophenol blue                             | 115-39-9    | e1k | 186 | 61 | Y | N |
| DTXSID7024586 | Benzothiazole                                | 95-16-9     | e1k | 200 | 4  | N | N |
| DTXSID7021863 | Diethyl propanedioate                        | 105-53-3    | e1k | 206 | 0  | N | N |
| DTXSID7021520 | 2-[2-(2-Butoxyethoxy)ethoxy]ethanol          | 143-22-6    | e1k | 200 | 2  | N | N |
| DTXSID6048208 | Methyl 2-methylbenzoate                      | 89-71-4     | e1k | 200 | 2  | N | N |

|               |                                     |            |     |     |    |   |   |
|---------------|-------------------------------------|------------|-----|-----|----|---|---|
| DTXSID7022679 | Biotin                              | 58-85-5    | e1k | 200 | -2 | N | N |
| DTXSID6047103 | Octadecyl sulfate sodium salt       | 1120-04-3  | e1k | 200 | 72 | Y | N |
| DTXSID7020425 | Dichlone                            | 117-80-6   | e1k | 200 | 41 | Y | N |
| DTXSID6034005 | Sulfamic acid                       | 5329-14-6  | e1k | 200 | 1  | N | N |
| DTXSID6042490 | Triethoxymethylsilane               | 2031-67-6  | e1k | 200 | 3  | N | N |
| DTXSID7026867 | Decanedioic acid                    | 111-20-6   | e1k | 200 | 1  | N | N |
| DTXSID6048204 | 4-Butylcyclohexanol                 | 70568-60-4 | e1k | 200 | 5  | N | N |
| DTXSID6042232 | Hydroxycitronellal                  | 107-75-5   | e1k | 200 | 5  | N | N |
| DTXSID7025502 | Linalool                            | 78-70-6    | e1k | 200 | -2 | N | N |
| DTXSID7024821 | 1-Chloro-4-(trifluoromethyl)benzene | 98-56-6    | e1k | 200 | -3 | N | N |
| DTXSID7025429 | 6-Hydroxy-2-naphthyl disulfide      | 6088-51-3  | e1k | 200 | 58 | Y | N |
| DTXSID6042234 | Octyl beta-D-glucopyranoside        | 29836-26-8 | e1k | 200 | -2 | N | N |
| DTXSID6041210 | gamma-Terpinene                     | 99-85-4    | e1k | 200 | 12 | N | N |
| DTXSID6041719 | C.I. Acid Yellow 17, disodium salt  | 6359-98-4  | e1k | 200 | 7  | N | N |
| DTXSID7026314 | Zinc pyrithione                     | 13463-41-7 | e1k | 200 | 3  | N | N |
| DTXSID6044430 | 1,2-Diphenylethanone                | 451-40-1   | e1k | 200 | -7 | N | N |
| DTXSID7021655 | Pentanoic acid                      | 109-52-4   | e1k | 200 | 1  | N | N |
| DTXSID6043915 | Hydroxyprogesterone caproate        | 630-56-8   | e1k | 200 | 3  | N | N |
| DTXSID7020766 | Propham                             | 122-42-9   | e1k | 200 | 2  | N | N |
| DTXSID6045400 | Ronidazole                          | 7681-76-7  | e1k | 200 | -3 | N | N |
| DTXSID6042369 | Rhodamine B                         | 81-88-9    | e1k | 200 | 16 | N | N |
| DTXSID6048202 | Isopropyl phenyl ketone             | 611-70-1   | e1k | 200 | 3  | N | N |
| DTXSID6031380 | Glycoluril                          | 496-46-8   | e1k | 200 | 3  | N | N |
| DTXSID7021815 | 3,4-Dichloroaniline                 | 95-76-1    | e1k | 200 | 5  | N | N |
| DTXSID6029755 | Propylene glycol monobutyl ether    | 29387-86-8 | e1k | 200 | 3  | N | N |
| DTXSID7022043 | 2,6-Pyridinedicarboxylic acid       | 499-83-2   | e1k | 200 | -1 | N | N |
| DTXSID7025506 | Linolenic acid                      | 463-40-1   | e1k | 200 | 43 | Y | N |
| DTXSID6032518 | 4,5-Dichloro-3H-1,2-dithiol-3-one   | 1192-52-5  | e1k | 200 | 3  | Y | N |
| DTXSID7026235 | Trimellitic anhydride               | 552-30-7   | e1k | 200 | -4 | N | N |
| DTXSID6041422 | 7-(Dimethylamino)-4-methylcoumarin  | 87-01-4    | e1k | 200 | 3  | N | N |
| DTXSID7025130 | Dimethylnaphthalene                 | 28804-88-8 | e1k | 200 | 9  | N | N |

|               |                                          |             |     |     |    |   |   |
|---------------|------------------------------------------|-------------|-----|-----|----|---|---|
| DTXSID6048206 | 4-Chloropentylbenzene                    | 79098-20-7  | e1k | 200 | 12 | N | N |
| DTXSID7026811 | Benzenethiol                             | 108-98-5    | e1k | 200 | 10 | N | N |
| DTXSID6041557 | Dihydromyrcenol                          | 53219-21-9  | e1k | 200 | -2 | N | N |
| DTXSID6032431 | S-Metolachlor                            | 87392-12-9  | e1k | 200 | 5  | N | N |
| DTXSID6044303 | Atorvastatin calcium                     | 134523-03-8 | e1k | 180 | 5  | N | N |
| DTXSID6034764 | Nicosulfuron                             | 111991-09-4 | e1k | 200 | 4  | N | N |
| DTXSID6048200 | 2,4,6-Trimethylbenzoic acid              | 480-63-7    | e1k | 200 | 1  | Y | N |
| DTXSID6042074 | Isopropyl-o-cresol                       | 499-75-2    | e1k | 200 | 3  | N | N |
| DTXSID6040795 | Chloramine-T trihydrate                  | 7080-50-4   | e1k | 200 | 2  | N | N |
| DTXSID7024031 | (E)-1,2-Dichloroethylene                 | 156-60-5    | e1k | 200 | -5 | N | N |
| DTXSID7025217 | (2-Dodeceny)succinic anhydride           | 19780-11-1  | e1k | 200 | 15 | N | N |
| DTXSID6042494 | Trimethoxypropylsilane                   | 1067-25-0   | e1k | 200 | 4  | N | N |
| DTXSID7023192 | Lactic acid                              | 50-21-5     | e1k | 200 | -3 | N | N |
| DTXSID6041424 | 2,6-Dimethyl-2-heptanol                  | 13254-34-7  | e1k | 200 | -5 | N | N |
| DTXSID7025427 | 2-Hydroxy-2-methylpropanenitrile         | 75-86-5     | e1k | 200 | 9  | N | N |
| DTXSID7020843 | Methyl linoleate                         | 112-63-0    | e1k | 200 | 16 | Y | N |
| DTXSID6047448 | Potassium chlorate                       | 3811-04-9   | e1k | 200 | 10 | N | N |
| DTXSID7026285 | Veratraldehyde                           | 120-14-9    | e1k | 200 | -6 | N | N |
| DTXSID7020768 | Kaempferol                               | 520-18-3    | e1k | 143 | 11 | N | N |
| DTXSID6041426 | 3,4-Dihydro-2H-pyran                     | 110-87-2    | e1k | 200 | 0  | N | N |
| DTXSID7026102 | Tetrachlorophthalic anhydride            | 117-08-8    | e1k | 200 | 3  | N | N |
| DTXSID6041472 | 3,5-Dimethyl-1-hexyn-3-ol                | 107-54-0    | e1k | 200 | -1 | N | N |
| DTXSID7021152 | 4-Phenylphenol                           | 92-69-3     | e1k | 200 | 14 | N | N |
| DTXSID7025003 | 2,5-Dichlorophenol                       | 583-78-8    | e1k | 200 | 3  | N | N |
| DTXSID6036467 | Disodium 4,4'-bis(2-sulfostyryl)biphenyl | 27344-41-8  | e1k | 200 | 94 | Y | N |
| DTXSID6041715 | C.I. Acid Violet 12, disodium salt       | 6625-46-3   | e1k | 190 | 11 | Y | N |
| DTXSID7021788 | 3-Trifluoromethyl-4-nitrophenol          | 88-30-2     | e1k | 200 | 7  | N | N |
| DTXSID7026368 | Salicylic acid                           | 69-72-7     | e1k | 200 | 3  | N | N |
| DTXSID6028022 | 1-(Bromomethyl)-3-phenoxybenzene         | 51632-16-7  | e1k | 200 | 14 | N | N |
| DTXSID7021364 | 2-Methylaniline hydrochloride            | 636-21-5    | e1k | 200 | 1  | N | N |

|               |                                                 |             |     |              |    |   |   |
|---------------|-------------------------------------------------|-------------|-----|--------------|----|---|---|
| DTXSID7020683 | Hexachloro-1,3-butadiene                        | 87-68-3     | e1k | 200          | 5  | N | N |
| DTXSID6027345 | Triphenylborane                                 | 960-71-4    | e1k | 200          | 10 | N | N |
| DTXSID6027713 | Polyoxyethylene monooleate                      | 9004-96-0   | e1k | 200<br>µg/ml | 56 | Y | N |
| DTXSID7022411 | 4,4'-Methylenebis(2,6-di-<br>butylphenol)       | 118-82-1    | e1k | 200          | 10 | N | N |
| DTXSID6041636 | (+/-)-alpha-Methylbenzyl acetate                | 93-92-5     | e1k | 200          | -1 | N | N |
| DTXSID7038864 | 2,2'-Methylenebis(ethyl-6-tert-<br>butylphenol) | 88-24-4     | e1k | 1000         | 87 | Y | N |
| DTXSID7027916 | Neodecanoic acid                                | 26896-20-8  | e1k | 200          | 1  | N | N |
| DTXSID7041889 | Diphenyl phosphite                              | 4712-55-4   | e1k | 200          | 5  | N | N |
| DTXSID7034549 | Dinotofuran                                     | 165252-70-0 | e1k | 191          | 5  | N | N |
| DTXSID7037262 | Pregnenolone carbonitrile                       | 1434-54-4   | e1k | 120          | 3  | N | N |
| DTXSID8021224 | C.I. Acid Red 114                               | 6459-94-5   | e1k | 140          | 99 | Y | N |
| DTXSID7034674 | Ipconazole                                      | 125225-28-7 | e1k | 200          | 33 | N | N |
| DTXSID7047433 | Equilin                                         | 474-86-2    | e1k | 200          | 4  | N | N |
| DTXSID7029611 | Triethylene glycol dibenzoate                   | 120-56-9    | e1k | 200          | 13 | N | N |
| DTXSID7042196 | Butyl lactate                                   | 138-22-7    | e1k | 200          | 6  | N | N |
| DTXSID7027540 | N-Butylbenzenesulfonamide                       | 3622-84-2   | e1k | 200          | 1  | N | N |
| DTXSID8021937 | 1-Heptanol                                      | 111-70-6    | e1k | 200          | 5  | N | N |
| DTXSID7027388 | Diisooctyl adipate                              | 1330-86-5   | e1k | 200          | 8  | N | N |
| DTXSID7029320 | 2-Ethylhexyl 4-<br>(dimethylamino)benzoate      | 21245-02-3  | e1k | 200          | 15 | N | N |
| DTXSID7029110 | 3,7-Dimethyl-3-octanol                          | 78-69-3     | e1k | 200          | 4  | N | N |
| DTXSID8024311 | Sodium fluoroacetate                            | 62-74-8     | e1k | 200          | 4  | N | N |
| DTXSID7042011 | N-Dodecanoyl-N-methylglycine                    | 97-78-9     | e1k | 195          | 13 | N | N |
| DTXSID8021062 | N-Nitrosopyrrolidine                            | 930-55-2    | e1k | 200          | -6 | N | N |
| DTXSID8021199 | Pebulate                                        | 1114-71-2   | e1k | 200          | 9  | N | N |
| DTXSID7030307 | 3,5-Dichloroaniline                             | 626-43-7    | e1k | 200          | 4  | N | N |
| DTXSID8022406 | 2,4-Dihydroxybenzophenone                       | 131-56-6    | e1k | 200          | -4 | N | N |
| DTXSID8021804 | Benzocaine                                      | 94-09-7     | e1k | 200          | 9  | N | N |
| DTXSID7035010 | Sodium warfarin                                 | 129-06-6    | e1k | 200          | 5  | N | N |

|               |                                             |            |     |     |     |   |   |
|---------------|---------------------------------------------|------------|-----|-----|-----|---|---|
| DTXSID7026946 | Linalyl acetate                             | 115-95-7   | e1k | 200 | -6  | N | N |
| DTXSID8024072 | Diphenamid                                  | 957-51-7   | e1k | 200 | -9  | N | N |
| DTXSID7027887 | Bis(2-ethylhexyl) tetrabromophthalate       | 26040-51-7 | e1k | 147 | -1  | N | N |
| DTXSID7047487 | Sulfuric acid, monononyl ester, sodium salt | 1072-15-7  | e1k | 200 | 8   | N | N |
| DTXSID8020381 | Deltamethrin                                | 52918-63-5 | e1k | 200 | 5   | N | N |
| DTXSID7041413 | R-(-)-Carvone                               | 6485-40-1  | e1k | 200 | 14  | N | N |
| DTXSID7030060 | 2,2-Dichloropropane                         | 594-20-7   | e1k | 200 | -5  | N | N |
| DTXSID7044394 | 4-tert-Butylcyclohexanone                   | 98-53-3    | e1k | 200 | -9  | N | N |
| DTXSID8022408 | Phenol red                                  | 143-74-8   | e1k | 200 | 0   | N | N |
| DTXSID7032688 | Phenothrin                                  | 26002-80-2 | e1k | 200 | 4   | N | N |
| DTXSID7027756 | 3-Phenoxybenzenemethanol                    | 13826-35-2 | e1k | 200 | -5  | N | N |
| DTXSID7044390 | N-Methylhydrazinecarbothioamide             | 6610-29-3  | e1k | 200 | -12 | N | N |
| DTXSID8021856 | 4-Butylaniline                              | 104-13-2   | e1k | 200 | 6   | N | N |
| DTXSID7032559 | ÃŹÃŹ»-Cyhalothrin                           | 91465-08-6 | e1k | 171 | 2   | N | N |
| DTXSID7038810 | Divinyltetramethyldisiloxane                | 2627-95-4  | e1k | 200 | -2  | N | N |
| DTXSID8020591 | Ethyl methylphenylglycidate                 | 77-83-8    | e1k | 200 | 0   | N | N |
| DTXSID7032345 | Chlorhexidine diacetate                     | 56-95-1    | e1k | 200 | 84  | Y | N |
| DTXSID7044718 | Acid Orange 156                             | 68555-86-2 | e1k | 200 | 51  | Y | N |
| DTXSID8022113 | 3,4-Dichloro-1-butene                       | 760-23-6   | e1k | 204 | -2  | N | N |
| DTXSID8020044 | Allyl alcohol                               | 107-18-6   | e1k | 200 | 2   | N | N |
| DTXSID7041544 | 6-Acetyl-1,1,2,4,4,7-hexamethyltetralin     | 21145-77-7 | e1k | 200 | 35  | N | N |
| DTXSID7027461 | Thiocarbazide                               | 2231-57-4  | e1k | 200 | 10  | N | N |
| DTXSID7027833 | 2-Ethyl-6-methylaniline                     | 24549-06-2 | e1k | 200 | 5   | N | N |
| DTXSID8021777 | Riboflavin                                  | 83-88-5    | e1k | 188 | 52  | Y | N |
| DTXSID7041962 | Ethyltriethoxysilane                        | 78-07-9    | e1k | 200 | 9   | N | N |
| DTXSID7028774 | C12-14-Alkyl glycidyl ether                 | 68609-97-2 | e1k | 119 | 34  | N | N |
| DTXSID8021931 | 1-Hexanol                                   | 111-27-3   | e1k | 200 | -4  | N | N |
| DTXSID7042198 | N-Butyl-p-toluenesulfonamide                | 1907-65-9  | e1k | 200 | 2   | N | N |
| DTXSID7037551 | Fenuron                                     | 101-42-8   | e1k | 200 | 1   | N | N |

|               |                                        |             |     |     |    |   |   |
|---------------|----------------------------------------|-------------|-----|-----|----|---|---|
| DTXSID7029162 | 3-Bromo-1-chloro-5,5-dimethylhydantoin | 126-06-7    | e1k | 200 | 0  | N | N |
| DTXSID7035272 | 2,6-Diisopropyl-naphthalene            | 24157-81-1  | e1k | 200 | 31 | N | N |
| DTXSID8020834 | Methyl carbamate                       | 598-55-0    | e1k | 200 | -3 | N | N |
| DTXSID8020179 | Diisopropanolamine                     | 110-97-4    | e1k | 200 | 1  | N | N |
| DTXSID7040360 | Isoxadifen-ethyl                       | 163520-33-0 | e1k | 200 | 4  | N | N |
| DTXSID7032630 | N-Benzyladenine                        | 1214-39-7   | e1k | 200 | -1 | N | N |
| DTXSID7029164 | Sodium 1,4-diisobutyl sulfosuccinate   | 127-39-9    | e1k | 200 | 0  | N | N |
| DTXSID8020969 | Nitroethane                            | 79-24-3     | e1k | 200 | -4 | N | N |
| DTXSID8022589 | Aminogluthethimide                     | 125-84-8    | e1k | 200 | -3 | N | N |
| DTXSID8020915 | 1-Naphthaleneacetic acid               | 86-87-3     | e1k | 200 | -6 | N | N |
| DTXSID7042356 | 2-(3-Phenylpropyl)pyridine             | 2110-18-1   | e1k | 200 | 2  | N | N |
| DTXSID7029661 | 3,5,5-Trimethyl-1-hexanol              | 3452-97-9   | e1k | 200 | 2  | N | N |
| DTXSID8021517 | Maleic acid                            | 110-16-7    | e1k | 200 | 0  | N | N |
| DTXSID7041675 | Bornyl acetate                         | 76-49-3     | e1k | 200 | 7  | N | N |
| DTXSID8020466 | N,N'-Diethylthiourea                   | 105-55-5    | e1k | 200 | -2 | N | N |
| DTXSID7042061 | Isobornyl acetate                      | 125-12-2    | e1k | 200 | -2 | N | N |
| DTXSID7040285 | 2-Hydroxyacetophenone                  | 118-93-4    | e1k | 200 | 1  | N | N |
| DTXSID7027837 | Tripropylene glycol                    | 24800-44-0  | e1k | 200 | -3 | N | N |
| DTXSID7034383 | Bispyribac-sodium                      | 125401-92-5 | e1k | 200 | 13 | N | N |
| DTXSID8021640 | Nonanedioic acid                       | 123-99-9    | e1k | 200 | 2  | N | N |
| DTXSID8026694 | 2-Ethylhexyl acetate                   | 103-09-3    | e1k | 200 | -3 | N | N |
| DTXSID9021639 | Nonanal                                | 124-19-6    | e1k | 200 | 19 | Y | N |
| DTXSID9021348 | Thiourea                               | 62-56-6     | e1k | 200 | 10 | N | N |
| DTXSID9025297 | 2-Ethylhexyl acrylate                  | 103-11-7    | e1k | 200 | 9  | N | N |
| DTXSID9020114 | Auramine hydrochloride                 | 2465-27-2   | e1k | 200 | 6  | N | N |
| DTXSID8042189 | N,N-Diisopropylaniline                 | 4107-98-6   | e1k | 200 | 11 | N | N |
| DTXSID8029157 | 2-(Phenylmethylene)-heptanal           | 122-40-7    | e1k | 200 | 30 | N | N |
| DTXSID8041957 | Ethyl orthoformate                     | 122-51-0    | e1k | 200 | 6  | N | N |
| DTXSID9021764 | 1-Amino-2-propanol                     | 78-96-6     | e1k | 200 | 12 | N | N |
| DTXSID9022100 | 4-Propylphenol                         | 645-56-7    | e1k | 200 | 4  | Y | N |

|               |                                     |            |     |     |    |   |   |
|---------------|-------------------------------------|------------|-----|-----|----|---|---|
| DTXSID8042422 | Styrene glycol                      | 93-56-1    | e1k | 200 | 5  | N | N |
| DTXSID8037754 | 2,4,6-Tris(allyloxy)-1,3,5-triazine | 101-37-1   | e1k | 200 | 5  | N | N |
| DTXSID8026698 | 4,4'-Dithiodimorpholine             | 103-34-4   | e1k | 200 | 1  | N | N |
| DTXSID8041298 | gamma-Caprolactone                  | 695-06-7   | e1k | 200 | 1  | Y | N |
| DTXSID8029153 | Benzyl benzoate                     | 120-51-4   | e1k | 200 | 10 | N | N |
| DTXSID9022526 | Benzylparaben                       | 94-18-8    | e1k | 200 | 16 | N | N |
| DTXSID8034324 | Phoxim                              | 14816-18-3 | e1k | 200 | 10 | N | N |
| DTXSID8026141 | Thioglycolic acid                   | 68-11-1    | e1k | 200 | 5  | N | N |
| DTXSID8035423 | 1,4-Dimethylnaphthalene             | 571-58-4   | e1k | 200 | 1  | N | N |
| DTXSID8041610 | Arabinose                           | 147-81-9   | e1k | 200 | -2 | N | N |
| DTXSID9026342 | 2-Phenylethanol                     | 60-12-8    | e1k | 200 | -4 | N | N |
| DTXSID9020409 | Dibenz(a,h)anthracene               | 53-70-3    | e1k | 180 | 8  | N | N |
| DTXSID9024691 | Butyl glycidyl ether                | 2426-08-6  | e1k | 200 | 2  | N | N |
| DTXSID9024194 | Mecoprop                            | 93-65-2    | e1k | 200 | 3  | N | N |
| DTXSID8027292 | Dibutyltin dichloride               | 683-18-1   | e1k | 200 | 3  | N | N |
| DTXSID8042052 | Indene                              | 95-13-6    | e1k | 200 | 13 | N | N |
| DTXSID8026228 | Triethyl phosphate                  | 78-40-0    | e1k | 200 | -8 | N | N |
| DTXSID8029159 | 2,6,8-Trimethyl-4-nonanol           | 123-17-1   | e1k | 200 | 20 | N | N |
| DTXSID8044202 | Octyl acetate                       | 112-14-1   | e1k | 200 | 1  | N | N |
| DTXSID8032675 | Sulprofos                           | 35400-43-2 | e1k | 200 | 1  | N | N |
| DTXSID8027377 | Dimethylaniline                     | 1300-73-8  | e1k | 200 | -3 | Y | N |
| DTXSID8040484 | Forskolin                           | 66575-29-9 | e1k | 200 | -6 | N | N |
| DTXSID9025291 | 2-Ethylhexanal                      | 123-05-7   | e1k | 209 | -6 | N | N |
| DTXSID8027793 | N-(Cyclohexylthio)phthalimide       | 17796-82-6 | e1k | 200 | 13 | N | N |
| DTXSID9021477 | Sodium tetrafluoroborate            | 13755-29-8 | e1k | 200 | 2  | N | N |
| DTXSID8042424 | Sulfaquinoxaline                    | 59-40-5    | e1k | 200 | -3 | N | N |
| DTXSID8027036 | 2,2-Dimethylpropane-1,3-diol        | 126-30-7   | e1k | 200 | 2  | N | N |
| DTXSID8027402 | Dimethyl isophthalate               | 1459-93-4  | e1k | 200 | -2 | N | N |
| DTXSID8029650 | Menthol                             | 1490-04-6  | e1k | 200 | 1  | N | N |
| DTXSID8029105 | 4-Toluenesulfonamide                | 70-55-3    | e1k | 199 | 10 | N | N |
| DTXSID9024986 | 4,4'-Dichlorodiphenyl sulfone       | 80-07-9    | e1k | 200 | -4 | N | N |

|               |                                                    |             |     |     |     |   |   |
|---------------|----------------------------------------------------|-------------|-----|-----|-----|---|---|
| DTXSID9022366 | Estriol                                            | 50-27-1     | e1k | 200 | -14 | N | N |
| DTXSID8042399 | Sodium abietate                                    | 14351-66-7  | e1k | 200 | 31  | N | N |
| DTXSID9023833 | Polydimethylsiloxane                               | 9016-00-6   | e1k | 200 | 3   | N | N |
| DTXSID8040775 | Terpineol                                          | 8000-41-7   | e1k | 200 | 7   | N | N |
| DTXSID9021922 | 2-(Ethylamino)ethanol                              | 110-73-6    | e1k | 200 | 8   | N | N |
| DTXSID8027032 | 2-Amino-2-methylpropan-1-ol                        | 124-68-5    | e1k | 200 | 5   | N | N |
| DTXSID8045191 | Ranitidine                                         | 66357-35-5  | e1k | 200 | 10  | N | N |
| DTXSID9025451 | 4-(2,6,6-Trimethyl-cyclohex-1-enyl)-but-3-en-2-one | 14901-07-6  | e1k | 200 | 4   | N | N |
| DTXSID8042426 | Sulfosuccinic acid                                 | 5138-18-1   | e1k | 200 | -3  | N | N |
| DTXSID8042503 | Tripropylene glycol butyl ether                    | 55934-93-5  | e1k | 200 | -4  | N | N |
| DTXSID9025403 | Hexyl benzoate                                     | 6789-88-4   | e1k | 200 | 14  | N | N |
| DTXSID8041955 | Ethyl diethanolamine                               | 139-87-7    | e1k | 200 | 0   | N | N |
| DTXSID8042187 | N,N'-Dibutylthiourea                               | 109-46-6    | e1k | 200 | 6   | N | N |
| DTXSID8024993 | Troclosene                                         | 2782-57-2   | e1k | 200 | 7   | N | N |
| DTXSID9021847 | Diphenyl oxide                                     | 101-84-8    | e1k | 200 | 6   | N | N |
| DTXSID8042507 | 1-Phenylurea                                       | 64-10-8     | e1k | 191 | 3   | N | N |
| DTXSID8026513 | 1,2,3,6-Tetrahydrophthalimide                      | 85-40-5     | e1k | 200 | -1  | N | N |
| DTXSID8025886 | Ethyl 3-phenylglycidate                            | 121-39-1    | e1k | 200 | 10  | N | N |
| DTXSID8042006 | Glyceryl monoctanoate                              | 26402-26-6  | e1k | 200 | 1   | N | N |
| DTXSID8027826 | Dicyclohexyl sodium sulfosuccinate                 | 23386-52-9  | e1k | 200 | 1   | N | N |
| DTXSID8026488 | Camphene                                           | 79-92-5     | e1k | 200 | 11  | N | N |
| DTXSID9025796 | Nonane                                             | 111-84-2    | e1k | 200 | -1  | N | N |
| DTXSID8027454 | N,N-Dimethylacetoacetamide                         | 2044-64-6   | e1k | 200 | -2  | N | N |
| DTXSID8027246 | 2-Pyrrolidinone                                    | 616-45-5    | e1k | 200 | 5   | N | N |
| DTXSID8047185 | Isopentyl benzoate                                 | 94-46-2     | e1k | 200 | 13  | N | N |
| DTXSID8034376 | Denatonium benzoate                                | 3734-33-6   | e1k | 200 | 6   | N | N |
| DTXSID9021138 | 1,4-Benzenediamine                                 | 106-50-3    | e1k | 200 | 16  | Y | N |
| DTXSID9020372 | o,p'-DDD                                           | 53-19-0     | e1k | 200 | 30  | N | N |
| DTXSID9022607 | Anastrozole                                        | 120511-73-1 | e1k | 68  | 4   | N | N |
| DTXSID9021897 | 3-Methylpyridine                                   | 108-99-6    | e1k | 200 | 3   | N | N |



|               |                                                                                    |             |     |     |    |   |   |
|---------------|------------------------------------------------------------------------------------|-------------|-----|-----|----|---|---|
| DTXSID8041909 | Dysprosium(III) chloride                                                           | 10025-74-8  | e1k | 188 | 19 | N | N |
| DTXSID9040710 | Octamethyltrisiloxane                                                              | 107-51-7    | e1k | 200 | 2  | N | N |
| DTXSID9035175 | Kinetin                                                                            | 525-79-1    | e1k | 200 | 0  | N | N |
| DTXSID9041861 | Diethyl phosphite                                                                  | 762-04-9    | e1k | 200 | -7 | N | N |
| DTXSID9042382 | Tetrapropyl orthosilicate                                                          | 682-01-9    | e1k | 200 | -2 | N | N |
| DTXSID9048190 | Methyl abietate                                                                    | 127-25-3    | e1k | 200 | 30 | N | N |
| DTXSID9029223 | 1,1-Bis(3,4-dimethylphenyl)ethane                                                  | 1742-14-9   | e1k | 200 | 28 | N | N |
| DTXSID9041815 | 3,3,5-Trimethylcyclohexanol                                                        | 116-02-9    | e1k | 200 | 5  | N | N |
| DTXSID9032531 | Bromuconazole                                                                      | 116255-48-2 | e1k | 200 | 16 | N | N |
| DTXSID9029302 | 2-Propyl-1-heptanol                                                                | 10042-59-8  | e1k | 200 | 5  | N | N |
| DTXSID9026841 | Dihexyl hexanedioate                                                               | 110-33-8    | e1k | 200 | 8  | N | N |
| DTXSID9041289 | Myristyltrimethylammonium chloride<br>N,N,N-Trimethyltetradecan-1-aminium chloride | 4574-04-3   | e1k | 177 | 78 | Y | N |
| DTXSID9034282 | 4-Chlorophenoxyacetic acid                                                         | 122-88-3    | e1k | 200 | 0  | N | N |
| DTXSID9041237 | alpha-Terpinene                                                                    | 99-86-5     | e1k | 200 | 13 | N | N |
| DTXSID9029649 | 1,3-Benzenedimethanamine                                                           | 1477-55-0   | e1k | 200 | 2  | N | N |
| DTXSID9036226 | Sodium octyl sulfate                                                               | 142-31-4    | e1k | 200 | 4  | N | N |
| DTXSID9040342 | Butylene carbonate                                                                 | 4437-85-8   | e1k | 200 | -7 | N | N |
| DTXSID9044538 | C.I. Disperse Orange 37                                                            | 13301-61-6  | e1k | 200 | 72 | Y | N |
| DTXSID9042415 | Sodium 4-methylbenzenesulfonate                                                    | 657-84-1    | e1k | 200 | 3  | N | N |
| DTXSID9034361 | Denatonium saccharide                                                              | 90823-38-4  | e1k | 200 | 4  | N | N |
| DTXSID9047590 | 2-Phenylethyl benzoate                                                             | 94-47-3     | e1k | 200 | 1  | N | N |
| DTXSID9037749 | 5-Chlorosalicylanilide                                                             | 4638-48-6   | e1k | 200 | 11 | Y | N |
| DTXSID9027528 | 3-(Methylthio)propanal                                                             | 3268-49-3   | e1k | 200 | 0  | N | N |
| DTXSID9027312 | 1-Phenoxy-2-propanol                                                               | 770-35-4    | e1k | 200 | -3 | N | N |
| DTXSID9041653 | Methyl 2,4-dihydroxy-3,6-dimethylbenzoate                                          | 4707-47-5   | e1k | 200 | 2  | N | N |
| DTXSID9032535 | Trinexapac-ethyl                                                                   | 95266-40-3  | e1k | 200 | 2  | N | N |
| DTXSID9026500 | 2-(4-Tert-Butylbenzyl)propionaldehyde                                              | 80-54-6     | e1k | 200 | 49 | N | N |
| DTXSID9026922 | Tetraethylene glycol                                                               | 112-60-7    | e1k | 200 | 0  | N | N |

|               |                                                                 |             |     |              |     |   |   |
|---------------|-----------------------------------------------------------------|-------------|-----|--------------|-----|---|---|
| DTXSID9034997 | Tributyltetradecylphosphonium chloride                          | 81741-28-8  | e1k | 200          | 102 | Y | N |
| DTXSID9041368 | 5-Ethyl-5-methylhydantoin                                       | 5394-36-5   | e1k | 200          | 0   | N | N |
| DTXSID9029146 | 4-Methylmorpholine                                              | 109-02-4    | e1k | 200          | 2   | N | N |
| DTXSID9029304 | Glyceryl stearates                                              | 11099-07-3  | e1k | 200          | -1  | N | N |
| DTXSID9047594 | Sodium 4-octylbenzenesulfonate                                  | 6149-03-7   | e1k | 200          | 62  | Y | N |
| DTXSID9048192 | 4-Butylchlorobenzene                                            | 15499-27-1  | e1k | 200          | -1  | N | N |
| DTXSID9048194 | Heptanophenone                                                  | 1671-75-6   | e1k | 200          | 24  | N | N |
| DTXSID9032533 | Chlorfenapyr                                                    | 122453-73-0 | e1k | 200          | 17  | N | N |
| DTXSID9027364 | N,N-Dimethyloctanamide                                          | 1118-92-9   | e1k | 200          | 4   | N | N |
| DTXSID9041491 | 3-Phenyl-2-propen-1-ol                                          | 104-54-1    | e1k | 200          | -4  | N | N |
| DTXSID9044823 | Sodium methacrylate                                             | 5536-61-8   | e1k | 200          | -1  | N | N |
| DTXSID9048198 | 4-Propylcyclohexanone                                           | 40649-36-3  | e1k | 200          | -1  | N | N |
| DTXSID9027863 | Polypropylene glycol                                            | 25322-69-4  | e1k | 200          | -2  | N | N |
| DTXSID9044825 | 3-tert-Butylphenol                                              | 585-34-2    | e1k | 200          | 6   | N | N |
| DTXSID9047205 | 2-Ethylhexyl trans-4-methoxycinnamate                           | 83834-59-7  | e1k | 200          | 17  | Y | N |
| DTXSID9048196 | 4-tert-Butylbenzenethiol                                        | 2396-68-1   | e1k | 200          | -3  | N | N |
| DTXSID9047708 | Igepal CO-890                                                   | NOCAS_47708 | e1k | 200<br>µg/ml | 1   | N | N |
| DTXSID9044536 | 1-(6-tert-Butyl-1,1-dimethyl-2,3-dihydro-1H-inden-4-yl)ethanone | 13171-00-1  | e1k | 200          | 33  | N | N |
| DTXSID9037745 | 4-tert-Butylphenyl salicylate                                   | 87-18-3     | e1k | 200          | 19  | N | N |
| DTXSID9044902 | Calcium neodecanoate                                            | 27253-33-4  | e1k | 200          | -1  | N | N |
| DTXSID9034317 | Benzalkonium chloride                                           | 8001-54-5   | e1k | 200          | 93  | Y | N |
| DTXSID9037539 | Endosulfan I                                                    | 959-98-8    | e1k | 200          | 28  | N | N |

**Supplementary Table 3. Concentration-response results.** All chemicals tested in concentration-response screening, including the 10 replicated test chemicals, 80 ToxCast chemicals that produced greater than 50% median inhibition in single-concentration screening, and 64 additional ToxCast chemicals that produced no or low to moderate inhibition in single-concentration screening; the 154 chemicals are organized by source, with name, CASRN, maximum concentration tested, median % inhibition at maximum concentration, and, absolute IC<sub>20</sub>, absolute IC<sub>50</sub>, and Hill slope for chemicals with Hill model as the best fit in ToxCast Pipeline (v2.0).

<sup>a</sup> Source. Test indicates set of chemicals selected based on previous testing for IYD inhibition and were replicated across multiple chemical source plates. ToxCast Chemical sets: ph1v2 indicates ToxCast phase 1\_v2 chemical library, ph2 indicates ToxCast phase 2 chemical library, ph3 indicates ToxCast phase 3 chemical library, and e1k indicates ToxCast e1k chemical library, all obtained via Dr. Ann Richard, EPA/ORD, Research Triangle Park, NC, USA. <sup>b</sup> Maximum concentration in concentration-response screening, in  $\mu\text{M}$  except indicated as  $\mu\text{g/ml}$  for polyoxyethylene monoleate. <sup>c</sup> Median % inhibition at maximum tested concentration for each chemical in concentration-response testing, n = 3 replicates. <sup>d</sup> --, chemical did not produce an inhibition curve or the IC<sub>20</sub> or IC<sub>50</sub> could not be calculated because the curve did not reach 20% or 50% inhibition.

| DSSTox_Substance_Id | Chemical                           | CASRN      | Source <sup>a</sup> | Max conc., $\mu\text{M}$ <sup>b</sup> | % Inhibition at max conc. <sup>c</sup> , median | IC <sub>20</sub> | IC <sub>50</sub> | Hillslope |
|---------------------|------------------------------------|------------|---------------------|---------------------------------------|-------------------------------------------------|------------------|------------------|-----------|
| DTXSID9021342       | Bithionol                          | 97-18-7    | test                | 200                                   | 97                                              | 26.64            | 53.79            | -1.9      |
| DTXSID5033836       | 4-Nonylphenol                      | 104-40-5   | test                | 200                                   | 98                                              | 8.94             | 23.62            | -1.4      |
| DTXSID5032498       | Triclosan                          | 3380-34-5  | test                | 200                                   | 112                                             | 10.41            | 28.71            | -1.2      |
| DTXSID4026181       | Tribromsalan                       | 87-10-5    | test                | 200                                   | 98                                              | 87.80            | 105.00           | -7.9      |
| DTXSID2021781       | Dibutyl phthalate                  | 84-74-2    | test                | 200                                   | 29                                              | 22.51            | -- <sup>d</sup>  | -8.0      |
| DTXSID7020182       | Bisphenol A                        | 80-05-7    | test                | 200                                   | 14                                              | --               | --               | --        |
| DTXSID5022308       | Genistein                          | 446-72-0   | test                | 200                                   | 4                                               | --               | --               | --        |
| DTXSID3022162       | Bromoxynil                         | 1689-84-5  | test                | 160                                   | 9                                               | --               | --               | --        |
| DTXSID8023848       | Acetochlor                         | 34256-82-1 | test                | 200                                   | 8                                               | --               | --               | --        |
| DTXSID5041306       | 2,2',4,4'-Tetrahydroxybenzophenone | 131-55-5   | test                | 200                                   | 7                                               | --               | --               | --        |
| DTXSID1024174       | Tribufos                           | 78-48-8    | ph1                 | 200                                   | 13                                              | --               | --               | --        |
| DTXSID2021151       | 2-Phenylphenol                     | 90-43-7    | ph1                 | 200                                   | 13                                              | --               | --               | --        |
| DTXSID2032500       | Triflumizole                       | 68694-11-1 | ph1                 | 200                                   | 21                                              | --               | --               | --        |
| DTXSID3024154       | Iprodione                          | 36734-19-7 | ph1                 | 200                                   | 6                                               | --               | --               | --        |
| DTXSID4022020       | Bromacil                           | 314-40-9   | ph1                 | 200                                   | 10                                              | --               | --               | --        |
| DTXSID4024270       | Prochloraz                         | 67747-09-5 | ph1                 | 200                                   | 5                                               | --               | --               | --        |
| DTXSID3031864       | Perfluorooctanesulfonic acid       | 1763-23-1  | ph1                 | 168                                   | 25                                              | 91.95            | --               | -8.0      |
| DTXSID2032392       | Fenoxaprop-ethyl                   | 66441-23-4 | ph1                 | 200                                   | 13                                              | --               | --               | --        |
| DTXSID4020450       | Dicofol                            | 115-32-2   | ph1                 | 200                                   | 46                                              | 72.02            | 220.73           | -1.4      |
| DTXSID2032390       | Fenarimol                          | 60168-88-9 | ph1                 | 200                                   | 0                                               | --               | --               | --        |

|               |                                                                                   |             |     |     |     |        |        |      |
|---------------|-----------------------------------------------------------------------------------|-------------|-----|-----|-----|--------|--------|------|
| DTXSID4032372 | Difenoconazole                                                                    | 119446-68-3 | ph1 | 200 | 19  | --     | --     | --   |
| DTXSID5024211 | Napropamide                                                                       | 15299-99-7  | ph1 | 200 | 7   | --     | --     | --   |
| DTXSID4032667 | Esfenvalerate                                                                     | 66230-04-4  | ph1 | 200 | 10  | --     | --     | --   |
| DTXSID7031248 | Diquat dibromide monohydrate                                                      | 6385-62-2   | ph1 | 100 | 98  | 5.77   | 11.67  | -2.0 |
| DTXSID5037523 | Diazoxon                                                                          | 962-58-3    | ph1 | 201 | 8   | --     | --     | --   |
| DTXSID8024109 | Flutolanil                                                                        | 66332-96-5  | ph1 | 200 | 9   | --     | --     | --   |
| DTXSID4024066 | 1,2-Dinitrobenzene                                                                | 528-29-0    | ph2 | 200 | 60  | 26.91  | 124.47 | -1.0 |
| DTXSID6032514 | 1,2-Benzenedicarboxaldehyde                                                       | 643-79-8    | ph2 | 200 | 76  | 26.71  | 77.13  | -1.3 |
| DTXSID9047259 | 1,3-Dichloro-6,7,8,9,10,12-hexahydroazepino[2,1-b]quinazoline hydrochloride (1:1) | 149062-75-9 | ph2 | 100 | 8   | --     | --     | --   |
| DTXSID1020807 | 2-Mercaptobenzothiazole                                                           | 149-30-4    | ph2 | 200 | -5  | --     | --     | --   |
| DTXSID4024359 | 2,4,5-Trichlorophenol                                                             | 95-95-4     | ph2 | 200 | 22  | 247.71 | --     | -8.0 |
| DTXSID7029241 | 2,4-Bis(1-methyl-1-phenylethyl)phenol                                             | 2772-45-4   | ph2 | 200 | 80  | 12.29  | 42.67  | -1.2 |
| DTXSID6027052 | 2,6-Di-tert-butylphenol                                                           | 128-39-2    | ph2 | 200 | 39  | 102.92 | --     | -8.0 |
| DTXSID2026602 | 2,4-Di-tert-butylphenol                                                           | 96-76-4     | ph2 | 200 | 82  | 41.25  | 92.21  | -1.7 |
| DTXSID1026081 | 3,3',5,5'-Tetrabromobisphenol A                                                   | 79-94-7     | ph2 | 191 | 105 | 24.12  | 59.82  | -1.3 |
| DTXSID9026974 | 2,4-Di-tert-pentylphenol                                                          | 120-95-6    | ph2 | 200 | 89  | 13.63  | 38.99  | -1.3 |
| DTXSID9022312 | 4-Octylphenol                                                                     | 1806-26-4   | ph2 | 200 | 88  | 23.27  | 39.12  | -2.9 |
| DTXSID5029055 | 4-Nonylphenol, branched                                                           | 84852-15-3  | ph2 | 200 | 105 | 17.39  | 39.52  | -1.6 |
| DTXSID9022360 | 4-(1,1,3,3-Tetramethylbutyl)phenol                                                | 140-66-9    | ph2 | 200 | 101 | 24.65  | 61.3   | -1.3 |
| DTXSID3037094 | 4-Hydroxytamoxifen                                                                | 68392-35-8  | ph2 | 50  | 16  | --     | --     | --   |
| DTXSID2037714 | 4-Heptylphenol                                                                    | 1987-50-4   | ph2 | 200 | 98  | 22.85  | 50.71  | -1.7 |
| DTXSID0047377 | AVE6324                                                                           | NOCAS_47377 | ph2 | 189 | 61  | 41.39  | 90.63  | -2.8 |
| DTXSID4024436 | Allura Red C.I.16035                                                              | 25956-17-6  | ph2 | 200 | 46  | 130.82 | 220.85 | -4.1 |
| DTXSID8020337 | Clomiphene citrate (1:1)                                                          | 50-41-9     | ph2 | 200 | 32  | 23.81  | --     | -1.4 |
| DTXSID8022959 | Docusate sodium                                                                   | 577-11-7    | ph2 | 200 | 100 | 16.21  | 33.02  | -1.9 |
| DTXSID4020375 | Dichlorodiphenyltrichloroethane                                                   | 50-29-3     | ph2 | 200 | 25  | 22.00  | --     | -8.0 |
| DTXSID5027932 | Dodecylbenzene sulfonate triethanolamine(1:1)                                     | 27323-41-7  | ph2 | 180 | 92  | 48.75  | 86.66  | -2.3 |
| DTXSID6027923 | Dodecylbenzenesulfonic acid                                                       | 27176-87-0  | ph2 | 200 | 102 | 20.11  | 34.55  | -2.5 |

|               |                                         |              |     |     |     |       |        |      |
|---------------|-----------------------------------------|--------------|-----|-----|-----|-------|--------|------|
| DTXSID9032537 | Didecyldimethylammonium chloride        | 7173-51-5    | ph2 | 200 | 98  | 25.18 | 60.08  | -1.5 |
| DTXSID1026900 | Dodecyltrimethylammonium chloride       | 112-00-5     | ph2 | 200 | 19  | --    | --     | --   |
| DTXSID1048174 | FR167356                                | 174185-16-1  | ph2 | 200 | 0   | --    | --     | --   |
| DTXSID5020653 | Gentian Violet                          | 548-62-9     | ph2 | 200 | 12  | --    | --     | --   |
| DTXSID8027955 | Isooctyl acrylate                       | 29590-42-9   | ph2 | 200 | 4   | --    | --     | --   |
| DTXSID1048170 | FR150011                                | 149413-74-1  | ph2 | 200 | 102 | 29.99 | 65.62  | -1.6 |
| DTXSID1020770 | Kepone                                  | 143-50-0     | ph2 | 200 | 95  | 7.58  | 33.41  | -0.9 |
| DTXSID6040371 | Fenaminosulf                            | 140-56-7     | ph2 | 200 | 70  | 18.12 | 74.92  | -1.1 |
| DTXSID2020189 | FD&C Blue No. 1                         | 3844-45-9    | ph2 | 200 | 42  | 60.60 | 777.39 | -1.3 |
| DTXSID5020944 | Nitrofurazone                           | 59-87-0      | ph2 | 200 | 66  | 27.58 | 118.62 | -1.0 |
| DTXSID4042121 | Mepanipirim                             | 110235-47-7  | ph2 | 200 | 10  | --    | --     | --   |
| DTXSID8047553 | Perfluoroundecanoic acid                | 2058-94-8    | ph2 | 200 | 73  | 23.50 | 55.35  | -1.9 |
| DTXSID4047337 | PharmaGSID_47337                        | 1061517-62-1 | ph2 | 200 | 100 | 71.97 | 108.49 | -3.1 |
| DTXSID7021784 | Salicylanilide                          | 87-17-2      | ph2 | 200 | 1   | --    | --     | --   |
| DTXSID4040713 | Octyl gallate                           | 1034-01-1    | ph2 | 200 | 97  | 32.83 | 71.42  | -1.7 |
| DTXSID3031860 | Perfluorodecanoic acid                  | 335-76-2     | ph2 | 200 | 91  | 21.70 | 48.02  | -1.7 |
| DTXSID1026031 | Sodium dodecyl sulfate                  | 151-21-3     | ph2 | 200 | 96  | 27.01 | 65.24  | -1.5 |
| DTXSID4042416 | Sodium myristyl sulfate                 | 1191-50-0    | ph2 | 200 | 104 | 11.25 | 25.73  | -1.6 |
| DTXSID7025219 | Sodium dodecylbenzenesulfonate          | 25155-30-0   | ph2 | 200 | 107 | 17.80 | 32.05  | -2.3 |
| DTXSID0042400 | Sodium hexyldecyl sulfate               | 1120-01-0    | ph2 | 100 | 102 | 14.49 | 29.5   | -1.9 |
| DTXSID8023719 | Troglitazone                            | 97322-87-7   | ph2 | 200 | 114 | 51.32 | 80.53  | -2.8 |
| DTXSID1034187 | Tamoxifen                               | 10540-29-1   | ph2 | 100 | 60  | 15.50 | 61.7   | -1.2 |
| DTXSID2026076 | Tannic acid                             | 1401-55-4    | ph2 | 70  | 101 | 6.60  | 7.85   | -8.0 |
| DTXSID6047288 | UK-337312                               | 203942-49-8  | ph2 | 200 | 91  | 13.86 | 47.1   | -1.1 |
| DTXSID8021301 | Tamoxifen citrate                       | 54965-24-1   | ph2 | 183 | 46  | 44.20 | 404.17 | -1.5 |
| DTXSID4040767 | 3,5-Dichlorosalicyl-3,4-dichloroanilide | 1154-59-2    | ph3 | 200 | 95  | 33.46 | 75.99  | -1.6 |
| DTXSID2031089 | D&C Red 27                              | 13473-26-2   | ph3 | 132 | 78  | 4.14  | 13.41  | -1.2 |
| DTXSID0041985 | Fluorosalan                             | 4776-06-1    | ph3 | 200 | 85  | 49.75 | 101.06 | -1.8 |
| DTXSID0023296 | Methylene blue                          | 61-73-4      | e1k | 200 | 53  | 1.86  | 3.36   | -3.1 |

|               |                                               |             |     |      |     |        |        |      |
|---------------|-----------------------------------------------|-------------|-----|------|-----|--------|--------|------|
| DTXSID0025234 | Eosin                                         | 17372-87-1  | e1k | 193  | 100 | 13.91  | 38.21  | -1.3 |
| DTXSID0038887 | Fluorescein                                   | 2321-07-5   | e1k | 200  | 19  | --     | --     | --   |
| DTXSID0042454 | Tetradecanoic acid, 2,3-dihydroxypropyl ester | 589-68-4    | e1k | 200  | 38  | 75.81  | --     | -2.2 |
| DTXSID0047957 | Octylparaben                                  | 1219-38-1   | e1k | 200  | 107 | 16.84  | 35.24  | -1.8 |
| DTXSID0042169 | Monotridecyl phosphate                        | 5116-94-9   | e1k | 200  | 107 | 20.88  | 37.6   | -2.3 |
| DTXSID1027891 | Calcium dodecylbenzene sulfonate              | 26264-06-2  | e1k | 200  | 105 | 17.08  | 26.00  | -3.2 |
| DTXSID1027926 | Dodecylphenol                                 | 27193-86-8  | e1k | 200  | 100 | 11.60  | 20.08  | -2.5 |
| DTXSID0048189 | Lauryl gallate                                | 1166-52-5   | e1k | 200  | 107 | 11.87  | 22.31  | -2.2 |
| DTXSID1022508 | 4-Dodecylphenol                               | 104-43-8    | e1k | 200  | 99  | 6.92   | 23.09  | -1.1 |
| DTXSID1027134 | Bis(2-ethylhexyl) phosphate                   | 298-07-7    | e1k | 200  | 57  | 97.27  | 135.34 | -8.0 |
| DTXSID1025809 | Oleic acid                                    | 112-80-1    | e1k | 200  | 89  | 21.29  | 34.10  | -3.1 |
| DTXSID1032648 | Z-Tetrachlorvinphos                           | 22248-79-9  | e1k | 200  | 10  | --     | --     | --   |
| DTXSID1048122 | Benzyl-C8-18-alkyldimethylammonium chlorides  | 63449-41-2  | e1k | 200  | 101 | 33.69  | 71.72  | -1.7 |
| DTXSID2029298 | Sodium lauryl polyoxyethylene ether sulfate   | 9004-82-4   | e1k | 200  | 97  | 42.62  | 74.57  | -2.4 |
| DTXSID2021602 | Hexadecanoic acid                             | 57-10-3     | e1k | 200  | 60  | 55.20  | 132.7  | -2.2 |
| DTXSID2027963 | Isooctadecanoic acid                          | 30399-84-9  | e1k | 200  | 104 | 20.82  | 39.24  | -2.1 |
| DTXSID2025505 | Linoleic acid                                 | 60-33-3     | e1k | 200  | 77  | 97.31  | 119.22 | -8.0 |
| DTXSID1044487 | Methyltrioctylammonium chloride               | 5137-55-3   | e1k | 200  | 101 | 7.68   | 26.09  | -1.0 |
| DTXSID2041252 | 1,4-Diaminoanthraquinone                      | 128-95-0    | e1k | 200  | 20  | --     | --     | --   |
| DTXSID3021770 | 2,2',6,6'-Tetrachlorobisphenol A              | 79-95-8     | e1k | 200  | 75  | 86.37  | 138.68 | -3.0 |
| DTXSID2044713 | Acid Red 337                                  | 67786-14-5  | e1k | 200  | 60  | 91.28  | 157.83 | -3.0 |
| DTXSID3027875 | Glyceryl monooleate                           | 25496-72-4  | e1k | 200  | 62  | 43.71  | 99.16  | -2.1 |
| DTXSID2036112 | 2-(8-Heptadecenyl)-2-imidazoline-1-ethanol    | 95-38-5     | e1k | 200  | 108 | 23.93  | 56.88  | -1.4 |
| DTXSID3020673 | FD&C Green No. 3                              | 2353-45-9   | e1k | 132  | 83  | 54.32  | 74.41  | -4.1 |
| DTXSID3040776 | Morin hydrate                                 | 654055-01-3 | e1k | 200  | 70  | 101.68 | 127.56 | -8   |
| DTXSID3040352 | Dinocap                                       | 39300-45-3  | e1k | 200  | 98  | 19.76  | 23.76  | -8   |
| DTXSID4022523 | Heptylparaben                                 | 1085-12-7   | e1k | 200  | 97  | 16.14  | 45.84  | -1.2 |
| DTXSID4035708 | Methylbenzethonium chloride                   | 25155-18-4  | e1k | 1000 | 105 | 13.55  | 32.22  | -1.6 |

|               |                                                |            |     |     |     |        |        |      |
|---------------|------------------------------------------------|------------|-----|-----|-----|--------|--------|------|
| DTXSID4020870 | 2,2'-Methylenebis(4-methyl-6-tert-butylphenol) | 119-47-1   | e1k | 200 | 92  | 7.75   | 28.94  | -1.0 |
| DTXSID4027076 | Dodecyl sulfate triethanolamine                | 139-96-8   | e1k | 200 | 81  | 28.52  | 70.62  | -1.6 |
| DTXSID4022525 | 2-Ethylhexylparaben                            | 5153-25-3  | e1k | 200 | 103 | 27.13  | 44.07  | -2.8 |
| DTXSID3041611 | Ascorbyl palmitate                             | 137-66-6   | e1k | 200 | 48  | 18.27  | 159.56 | -1.8 |
| DTXSID3041409 | 2-Chloro-N-phenylacetamide                     | 587-65-5   | e1k | 200 | 6   | --     | --     | --   |
| DTXSID3047425 | 4-Butylphenol                                  | 1638-22-8  | e1k | 200 | 25  | 167.44 | --     | -6.5 |
| DTXSID5020029 | Acrylonitrile                                  | 107-13-1   | e1k | 200 | 5   | --     | --     | --   |
| DTXSID4048193 | 4,4'-Di-tert-butylbiphenyl                     | 1625-91-8  | e1k | 200 | 6   | --     | --     | --   |
| DTXSID5034981 | Tributyltin benzoate                           | 4342-36-3  | e1k | 200 | 14  | --     | --     | --   |
| DTXSID4042418 | Sodium tridecyl sulfate                        | 3026-63-9  | e1k | 200 | 107 | 16.06  | 31.66  | -2.0 |
| DTXSID5022437 | Nordihydroguaiaietic acid                      | 500-38-9   | e1k | 200 | 26  | 129.69 | --     | -7.9 |
| DTXSID5032315 | 4,5-Dichloro-2-octyl-3(2H)-isothiazolone       | 64359-81-5 | e1k | 200 | 33  | 132.86 | 647.73 | -2.8 |
| DTXSID4042171 | 4-Dodecylmorpholine                            | 1541-81-7  | e1k | 200 | 45  | 49.09  | 442.07 | -1.0 |
| DTXSID5041726 | C.I. Direct Red 81 disodium salt               | 2610-11-9  | e1k | 200 | 98  | 73.18  | 87.40  | -8.0 |
| DTXSID5042243 | Oleyl sarcosine                                | 110-25-8   | e1k | 200 | 99  | 21.00  | 54.51  | -1.3 |
| DTXSID5044865 | 2,2'-(Tetradecylimino)diethanol                | 18924-66-8 | e1k | 200 | 62  | 11.93  | 103.99 | -0.7 |
| DTXSID5035589 | Disiquonium chloride                           | 68959-20-6 | e1k | 200 | 69  | 32.99  | 100.59 | -1.3 |
| DTXSID6024624 | Bisphenol A diglycidyl ether                   | 1675-54-3  | e1k | 200 | 9   | --     | --     | --   |
| DTXSID5037028 | Hexadecyltrimethylammonium bromide             | 57-09-0    | e1k | 200 | 104 | 20.72  | 24.73  | -7.7 |
| DTXSID6021666 | Tetradecanoic acid                             | 544-63-8   | e1k | 200 | 66  | 53.89  | 124.40 | -1.9 |
| DTXSID6021824 | Dichlorophen                                   | 97-23-4    | e1k | 200 | 47  | 94.60  | 594.89 | -2.4 |
| DTXSID6041682 | Bromophenol blue                               | 115-39-9   | e1k | 186 | 74  | 85.05  | 105.84 | -8.0 |
| DTXSID6047103 | Octadecyl sulfate sodium salt                  | 1120-04-3  | e1k | 200 | 69  | 6.61   | 41.02  | -0.8 |
| DTXSID7020425 | Dichlone                                       | 117-80-6   | e1k | 200 | 33  | 72.55  | --     | -1.1 |
| DTXSID7025429 | 6-Hydroxy-2-naphthyl disulfide                 | 6088-51-3  | e1k | 200 | 52  | 29.89  | 187.96 | -0.8 |
| DTXSID7025506 | Linolenic acid                                 | 463-40-1   | e1k | 200 | 8   | --     | --     | --   |
| DTXSID6032518 | 4,5-Dichloro-3H-1,2-dithiol-3-one              | 1192-52-5  | e1k | 200 | 7   | --     | --     | --   |
| DTXSID6048200 | 2,4,6-Trimethylbenzoic acid                    | 480-63-7   | e1k | 200 | 1   | --     | --     | --   |

|               |                                                                                    |            |     |              |     |        |        |      |
|---------------|------------------------------------------------------------------------------------|------------|-----|--------------|-----|--------|--------|------|
| DTXSID7020843 | Methyl linoleate                                                                   | 112-63-0   | e1k | 200          | 27  | 130.42 | --     | -2.2 |
| DTXSID6036467 | Disodium 4,4'-bis(2-sulfoxyethyl)phenyl                                            | 27344-41-8 | e1k | 200          | 102 | 50.75  | 88.84  | -2.3 |
| DTXSID6041715 | C.I. Acid Violet 12, disodium salt                                                 | 6625-46-3  | e1k | 190          | 29  | 102.80 | --     | -0.8 |
| DTXSID6027713 | Polyoxyethylene monoleate                                                          | 9004-96-0  | e1k | 200<br>µg/ml | 39  | 107.26 | --     | -8   |
| DTXSID7038864 | 2,2'-Methylenebis(ethyl-6-tert-butylphenol)                                        | 88-24-4    | e1k | 1000         | 87  | 42.50  | 113.84 | -1.5 |
| DTXSID8021224 | C.I. Acid Red 114                                                                  | 6459-94-5  | e1k | 140          | 103 | 18.01  | 36.87  | -1.7 |
| DTXSID7032345 | Chlorhexidine diacetate                                                            | 56-95-1    | e1k | 200          | 69  | 32.02  | 77.69  | -1.9 |
| DTXSID7044718 | Acid Orange 156                                                                    | 68555-86-2 | e1k | 200          | 10  | --     | --     | --   |
| DTXSID8021777 | Riboflavin                                                                         | 83-88-5    | e1k | 188          | 35  | 97.7   | --     | -1.9 |
| DTXSID9021639 | Nonanal                                                                            | 124-19-6   | e1k | 200          | -1  | --     | --     | --   |
| DTXSID9022100 | 4-Propylphenol                                                                     | 645-56-7   | e1k | 200          | -4  | --     | --     | --   |
| DTXSID8041298 | gamma-Caprolactone                                                                 | 695-06-7   | e1k | 200          | 1   | --     | --     | --   |
| DTXSID8027377 | Dimethylaniline                                                                    | 1300-73-8  | e1k | 200          | -3  | --     | --     | --   |
| DTXSID9021138 | 1,4-Benzenediamine                                                                 | 106-50-3   | e1k | 200          | 9   | --     | --     | --   |
| DTXSID9041289 | Myristyltrimethylammonium chloride<br>N,N,N-Trimethyltetradecan-1-aminium chloride | 4574-04-3  | e1k | 177          | 56  | 75.17  | 164.09 | -2.3 |
| DTXSID9044538 | C.I. Disperse Orange 37                                                            | 13301-61-6 | e1k | 200          | 45  | 123.08 | --     | -7.8 |
| DTXSID9037749 | 5-Chlorosalicylanilide                                                             | 4638-48-6  | e1k | 200          | 2   | --     | --     | --   |
| DTXSID9034997 | Tributyltetradecylphosphonium chloride                                             | 81741-28-8 | e1k | 200          | 96  | 55.23  | 94.40  | -2.4 |
| DTXSID9047594 | Sodium 4-octylbenzenesulfonate                                                     | 6149-03-7  | e1k | 200          | 44  | 101.18 | --     | -7.9 |
| DTXSID9047205 | 2-Ethylhexyl trans-4-methoxycinnamate                                              | 83834-59-7 | e1k | 200          | 5   | --     | --     | --   |
| DTXSID9034317 | Benzalkonium chloride                                                              | 8001-54-5  | e1k | 200          | 72  | 41.35  | 98.48  | -1.8 |



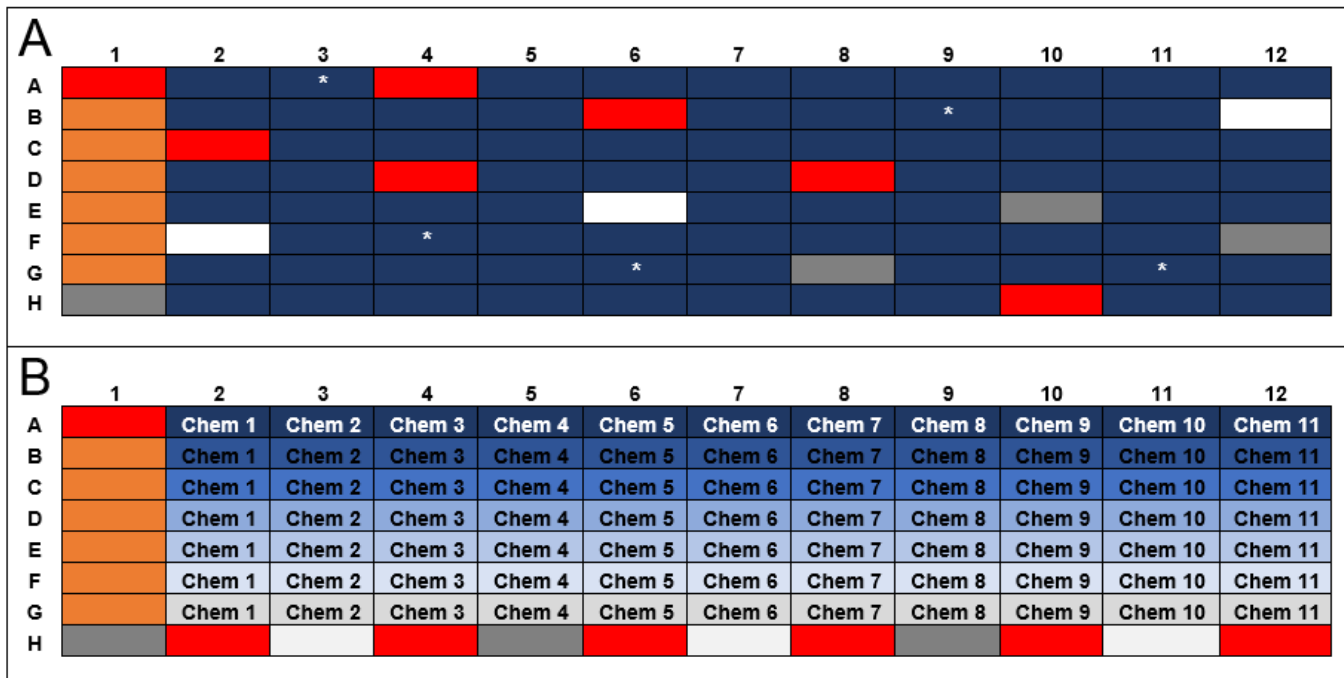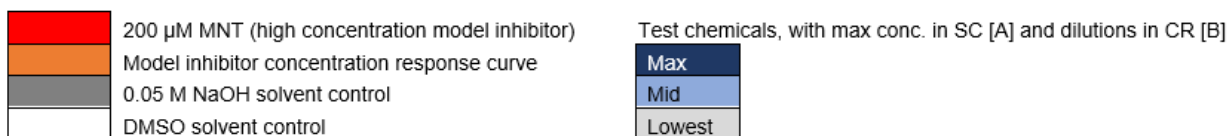

**Supplementary Figure 1.** Example layouts for assay plates: [A] Single-concentration screening at a target concentration of 200  $\mu$ M. Chemical source plates were received with column 1 empty for the concentration-response curve for the model inhibitor, 3-Nitro-L-tyrosine (MNT) from the high concentration of 200  $\mu$ M. Twelve additional wells were left empty on the source plate to which dimethyl sulfoxide (DMSO) was added to 3 wells (white blocks), 0.05 M sodium hydroxide (NaOH) was added to 3 wells (medium grey blocks), and the model inhibitor MNT (red blocks) was added to the remaining 6 wells to establish the fully inhibited response level. Chemicals from the replicated test-set were repeated across multiple plates and example wells for these chemicals are indicated with an asterisk. These were randomly assigned to wells on each plate. [B] Concentration-response screening with seven concentrations in serial dilutions from maximum tested concentration. The concentration-response curve for the model inhibitor, MNT was in column 1. Row H had 3 DMSO wells (white blocks), 3 0.05 M NaOH wells (medium grey blocks), and 6 model inhibitor MNT wells (red blocks). Final MNT concentrations in column 1 were 200, 1.0, 0.16, 0.075, 0.025, 0.005, and 0.0005  $\mu$ M from highest (row A) to lowest (row G). Column 1 row H contained 0.05 M NaOH.

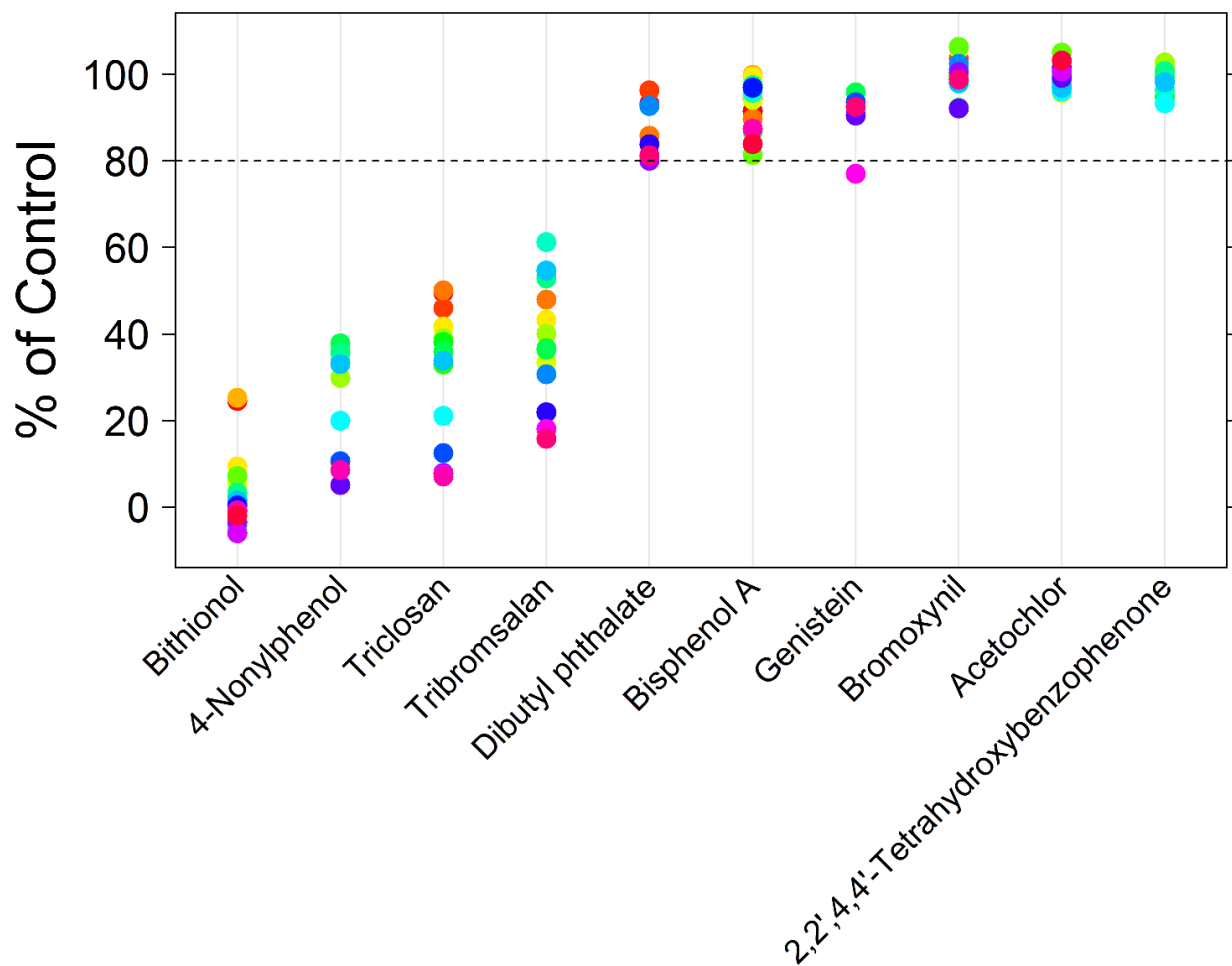

- |            |   |            |   |            |   |            |   |
|------------|---|------------|---|------------|---|------------|---|
| EPAPLT0086 | ● | EPAPLT0128 | ● | EPAPLT0135 | ● | EPAPLT0142 | ● |
| EPAPLT0087 | ● | EPAPLT0129 | ● | EPAPLT0136 | ● | EPAPLT0143 | ● |
| EPAPLT0088 | ● | EPAPLT0130 | ● | EPAPLT0137 | ● | EPAPLT0144 | ● |
| EPAPLT0089 | ● | EPAPLT0131 | ● | EPAPLT0138 | ● | EPAPLT0145 | ● |
| EPAPLT0125 | ● | EPAPLT0132 | ● | EPAPLT0139 | ● | EPAPLT0146 | ● |
| EPAPLT0126 | ● | EPAPLT0133 | ● | EPAPLT0140 | ● |            |   |
| EPAPLT0127 | ● | EPAPLT0134 | ● | EPAPLT0141 | ● |            |   |

**Supplementary Figure 2.** Single-concentration screening results for the 10 test chemicals replicated across multiple chemical source plates (represented by different colors) to evaluate the plate-to-plate variability. Deiodinase inhibition produced by test chemicals that were randomly replicated across the chemical source plates. The following chemicals were included: Tribromsalan (CASRN: 87-10-5), Bithionol (CASRN: 97-18-7), Triclosan (CASRN: 3380-34-5), Bromoxynil (CASRN: 1689-84-5), Bisphenol A (80-05-7), Dibutyl phthalate (84-74-2), Acetochlor (34256-82-1), Genistein (446-72-0), 4-nonylphenol (104-40-5), 2,2',4,4'-Tetrahydroxybenzophenone (131-55-5), based on availability for plating on the chemical source plates and previous testing for IYD inhibition in Shimizu et al. (2013) or Renko et al. (2016).

**Supplementary Figure 3.** Concentration-response curves for inhibition of IYD by model inhibitor MNT for all single-concentration and concentration-response assay plates, with multiple plates included on each of the following four pages. Each triplicate test of a plate has different symbols and fit line, solid circle with solid line = rep 1, open triangle with dashed line = rep 2, × with dotted line = rep 3. DMSO = dimethyl sulfoxide; NaOH = sodium hydroxide.

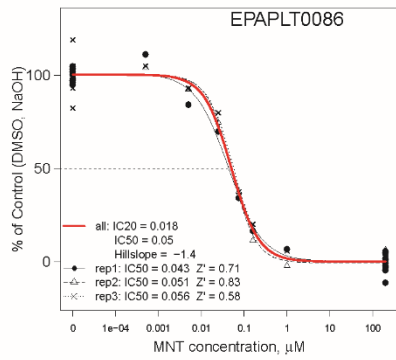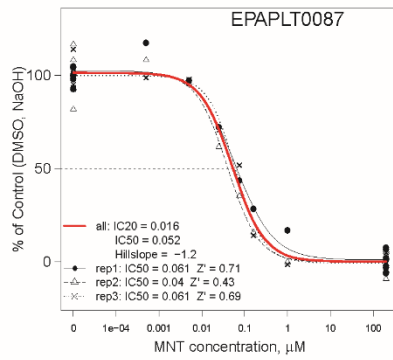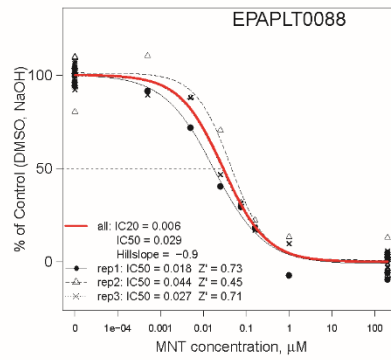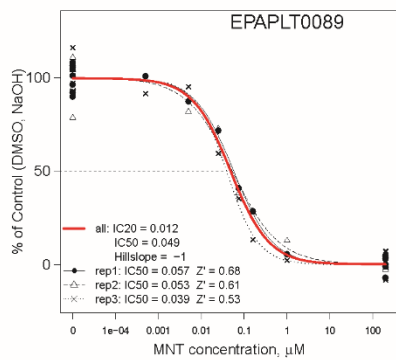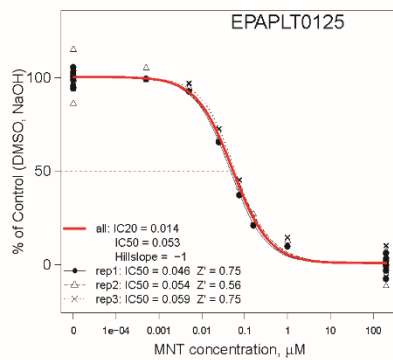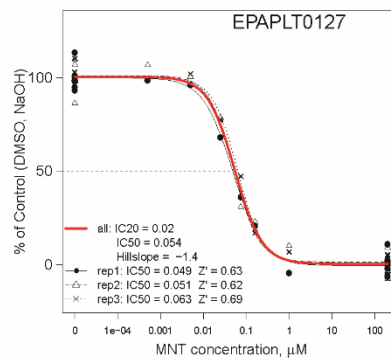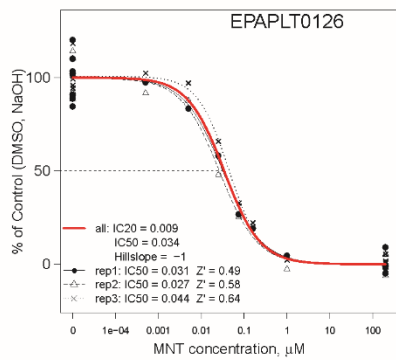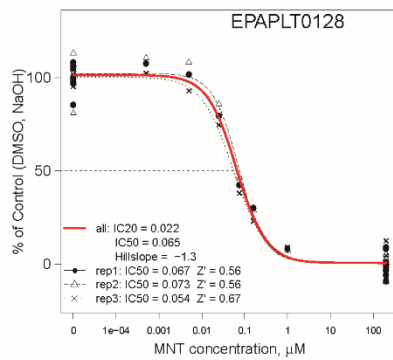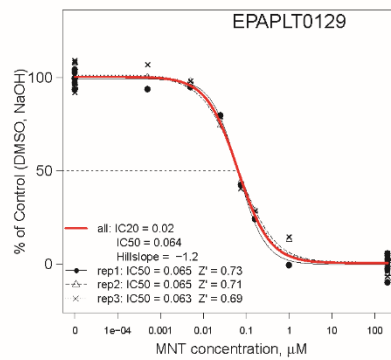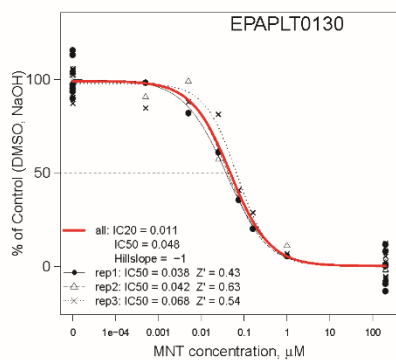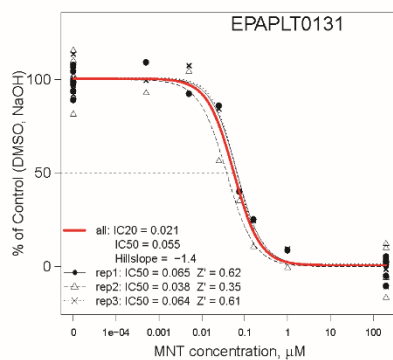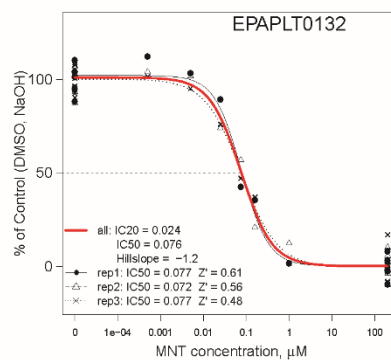

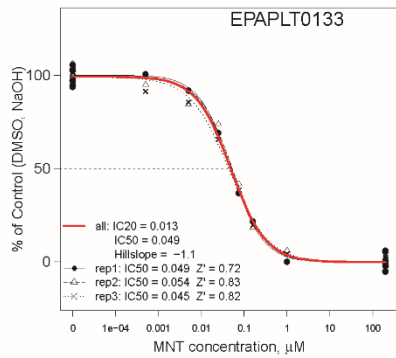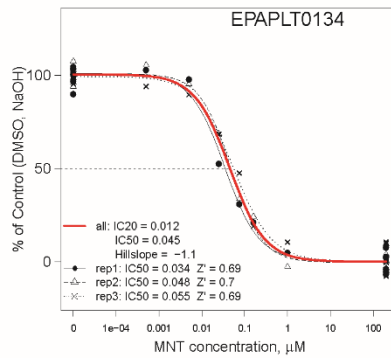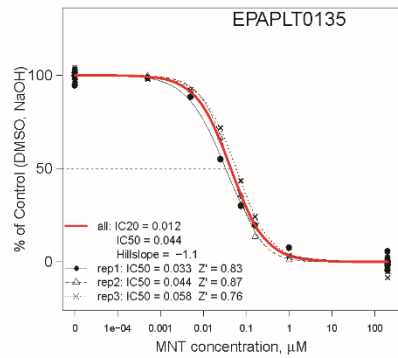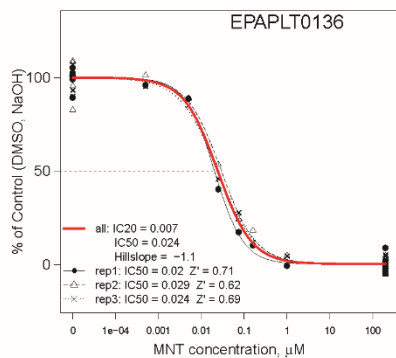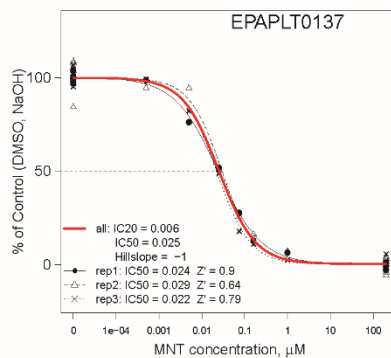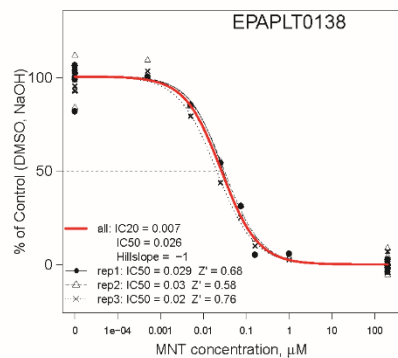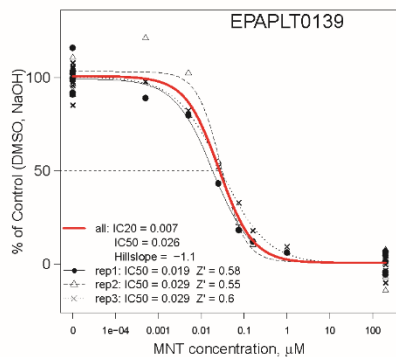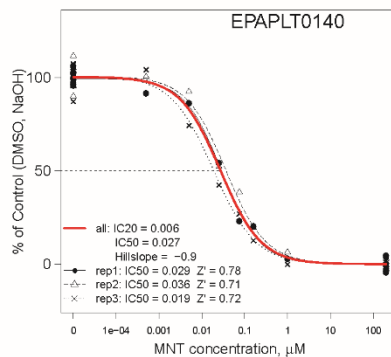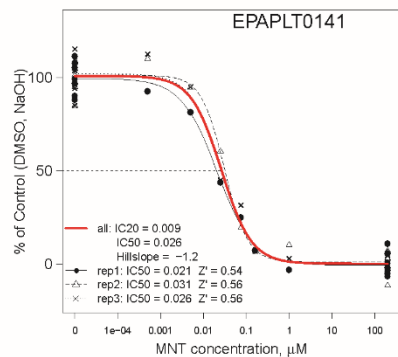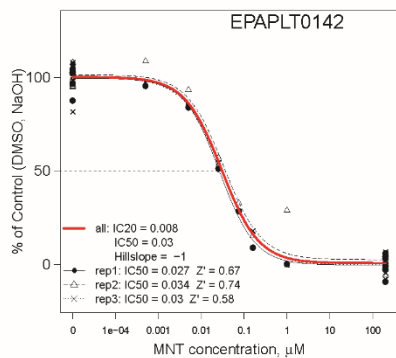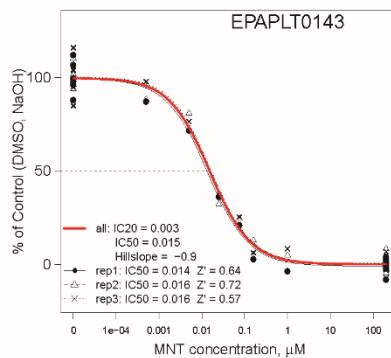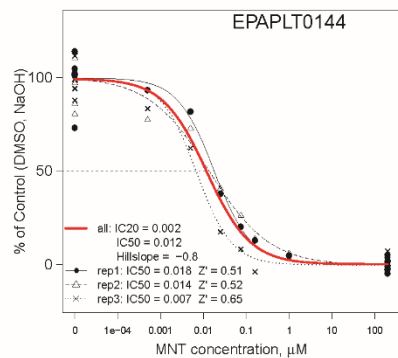

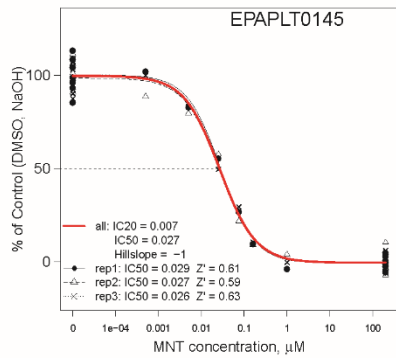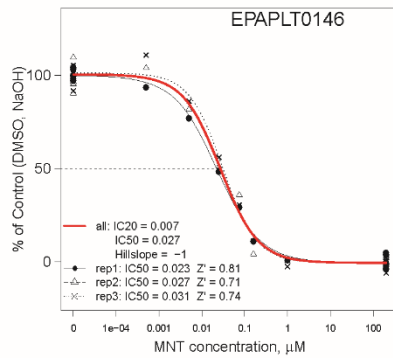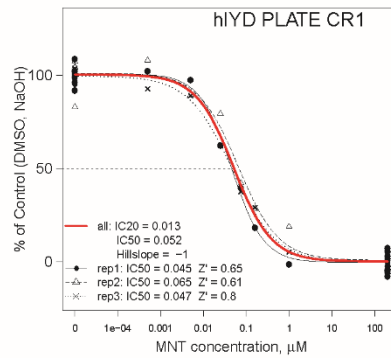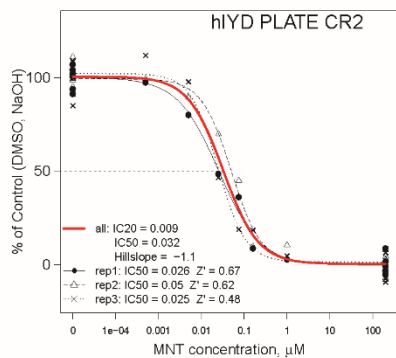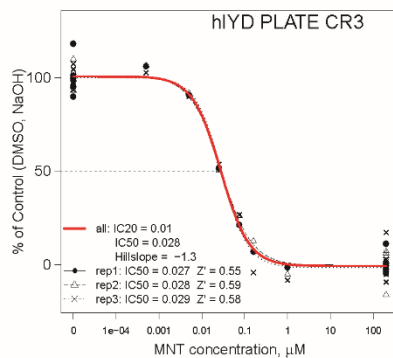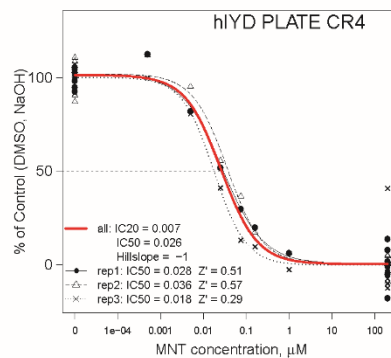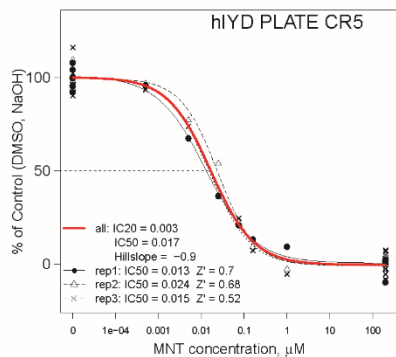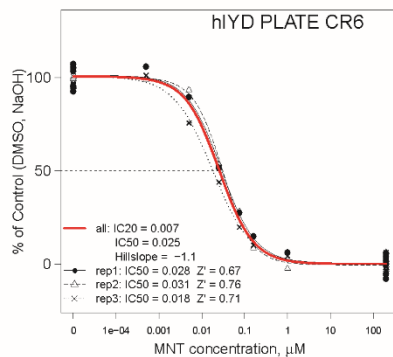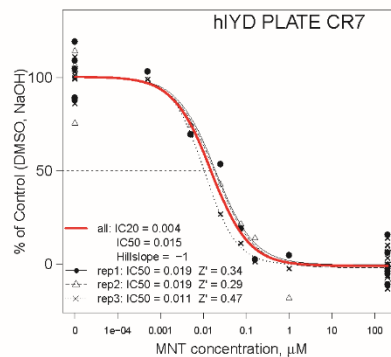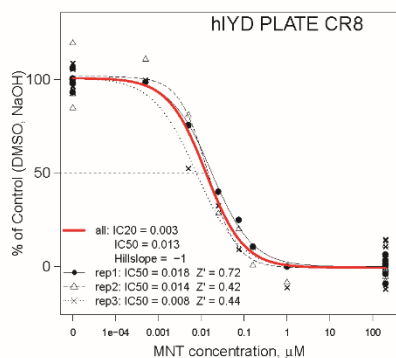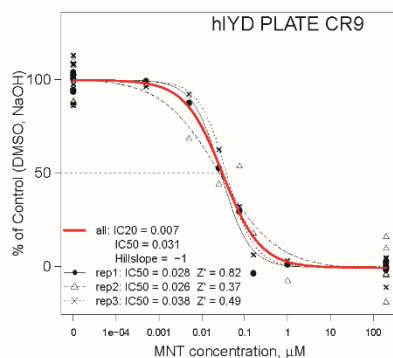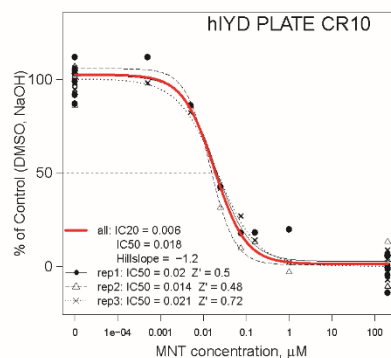

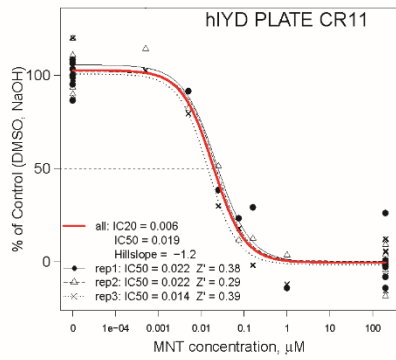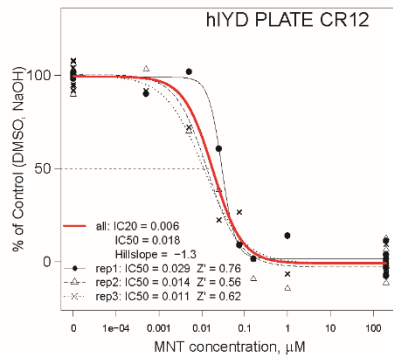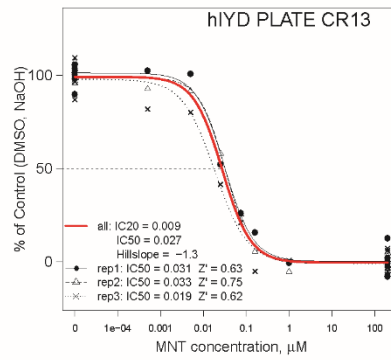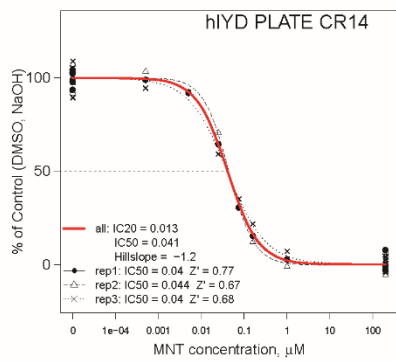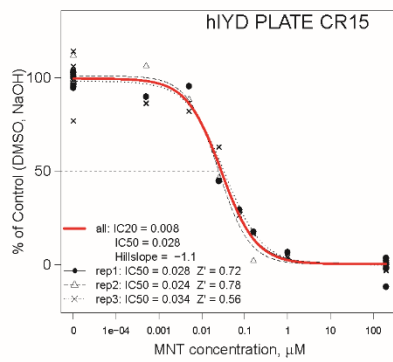

**Supplementary Figure 4. Concentration-response screening data.** Inhibition of iodotyrosine deiodinase (IYD) produced by all chemicals tested in concentration-response (CR) screening at seven concentrations. Hill model curve, absolute  $IC_{50}$ , and Hill slope included for the chemicals where Hill model fit in ToxCast pipeline (tpl v2.0); the following 154 pages include CR results for one chemical per page. DMSO = dimethyl sulfoxide; NaOH = sodium hydroxide. NA = not applicable (Hill model did not fit data and/or 50% inhibition not produced in concentration-response testing).





# Tribufos

CASRN: 78-48-8

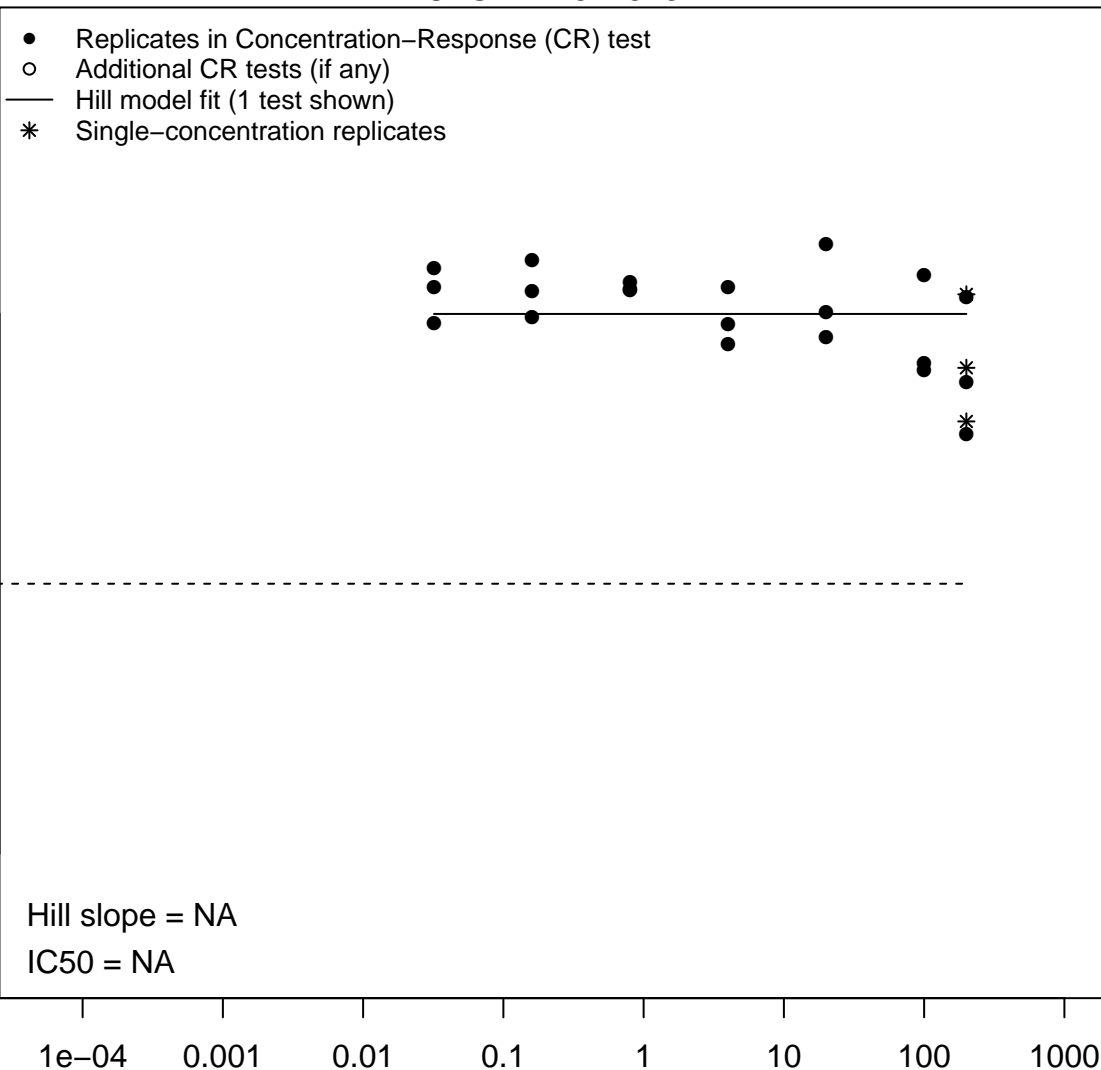

# Bithionol

CASRN: 97-18-7

- Replicates in Concentration-Response (CR) test
- Additional CR tests (if any)
- Hill model fit (1 test shown)
- \* Single-concentration replicates

% of Control (DMSO, NaOH)

100

50

0

Hill slope = -1.9

IC50 = 53.8

1e-04

0.001

0.01

0.1

1

10

100

1000

Concentration,  $\mu\text{M}$

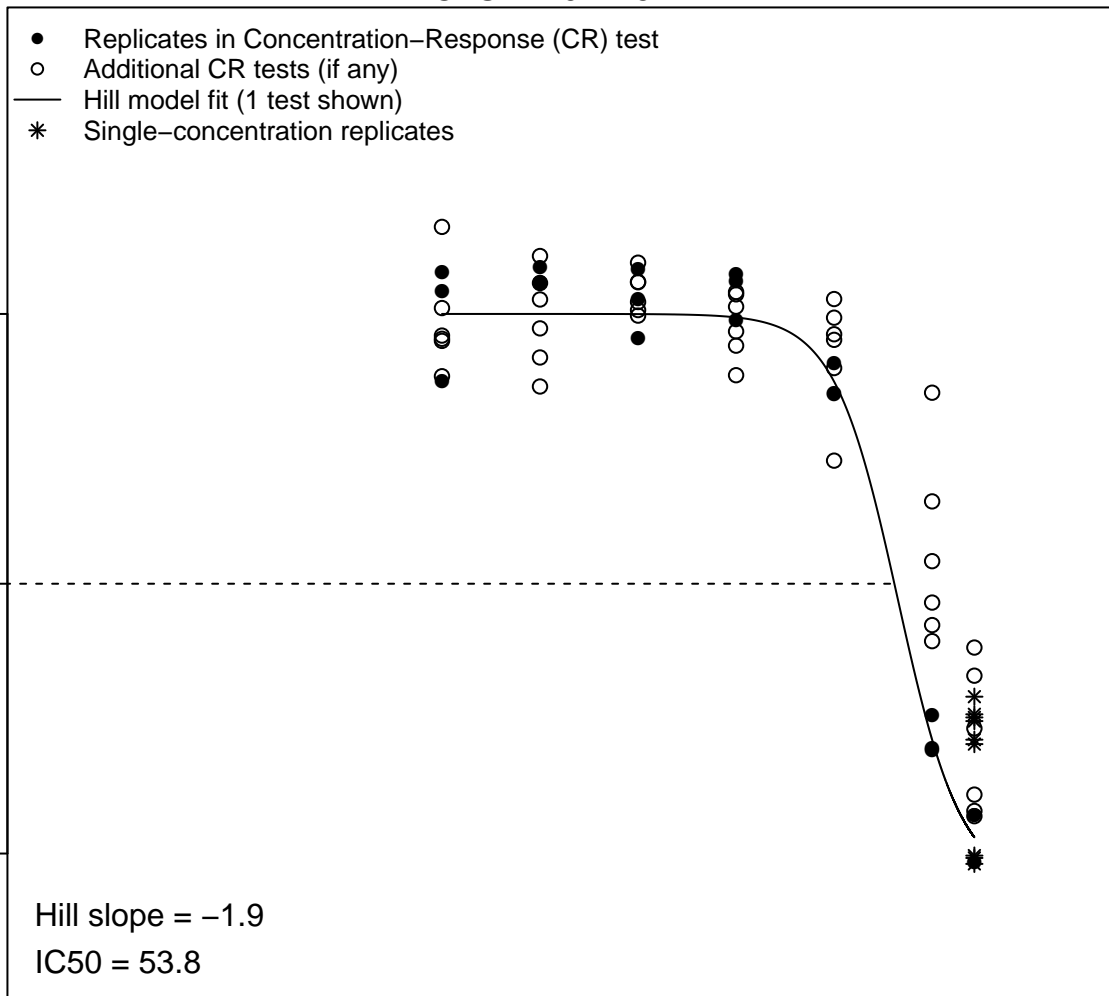

# 2-Phenylphenol

CASRN: 90-43-7

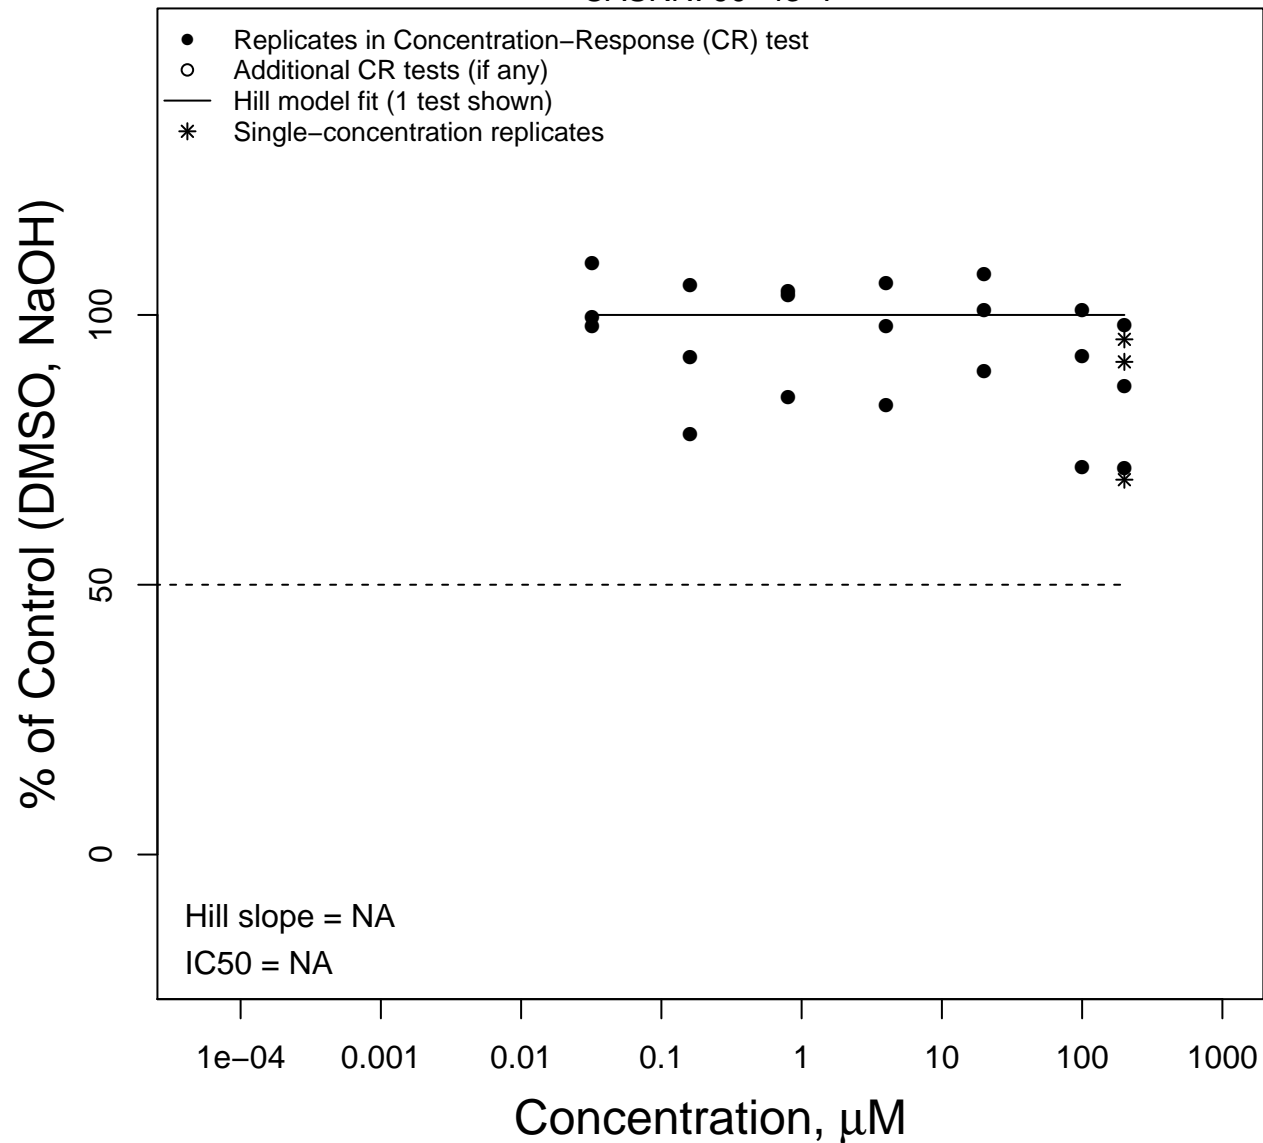

# Triflumizole

CASRN: 68694-11-1

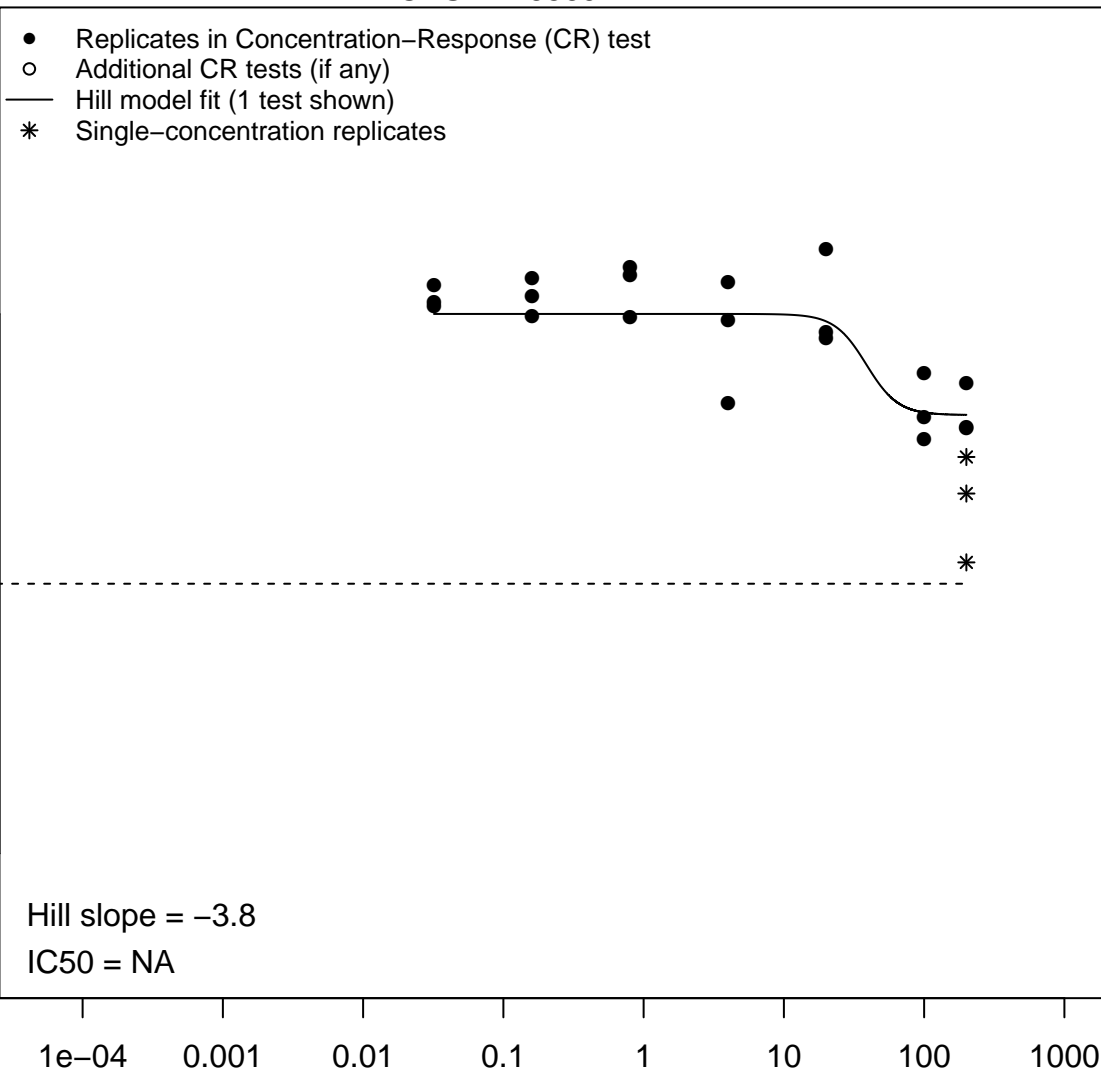

Concentration, µM

% of Control (DMSO, NaOH)

# Iprodione

CASRN: 36734-19-7

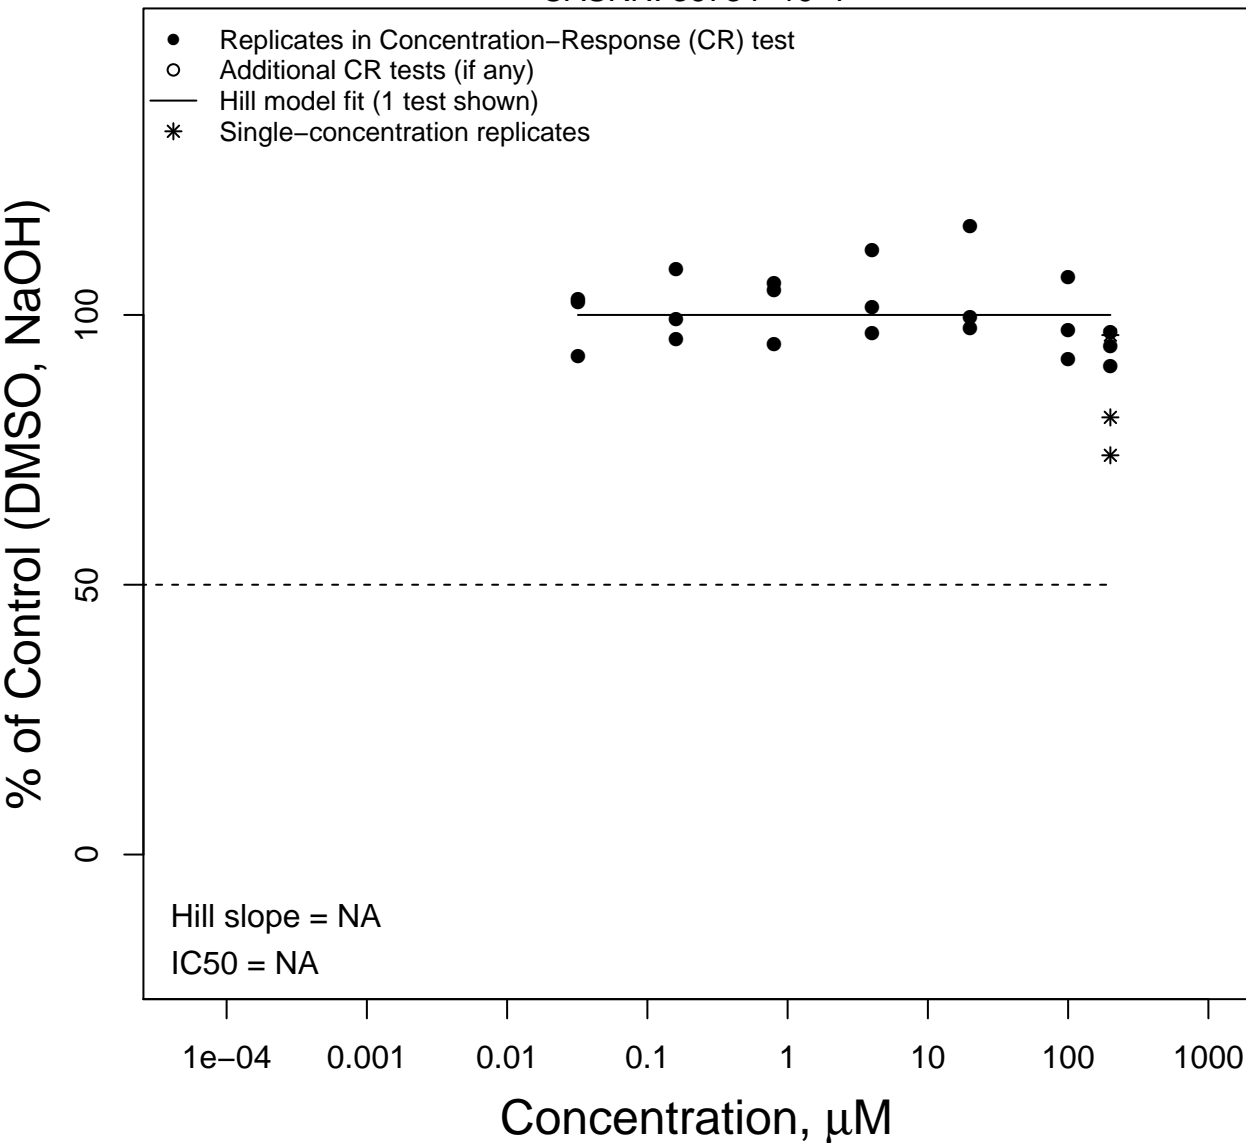

# Bromacil

CASRN: 314-40-9

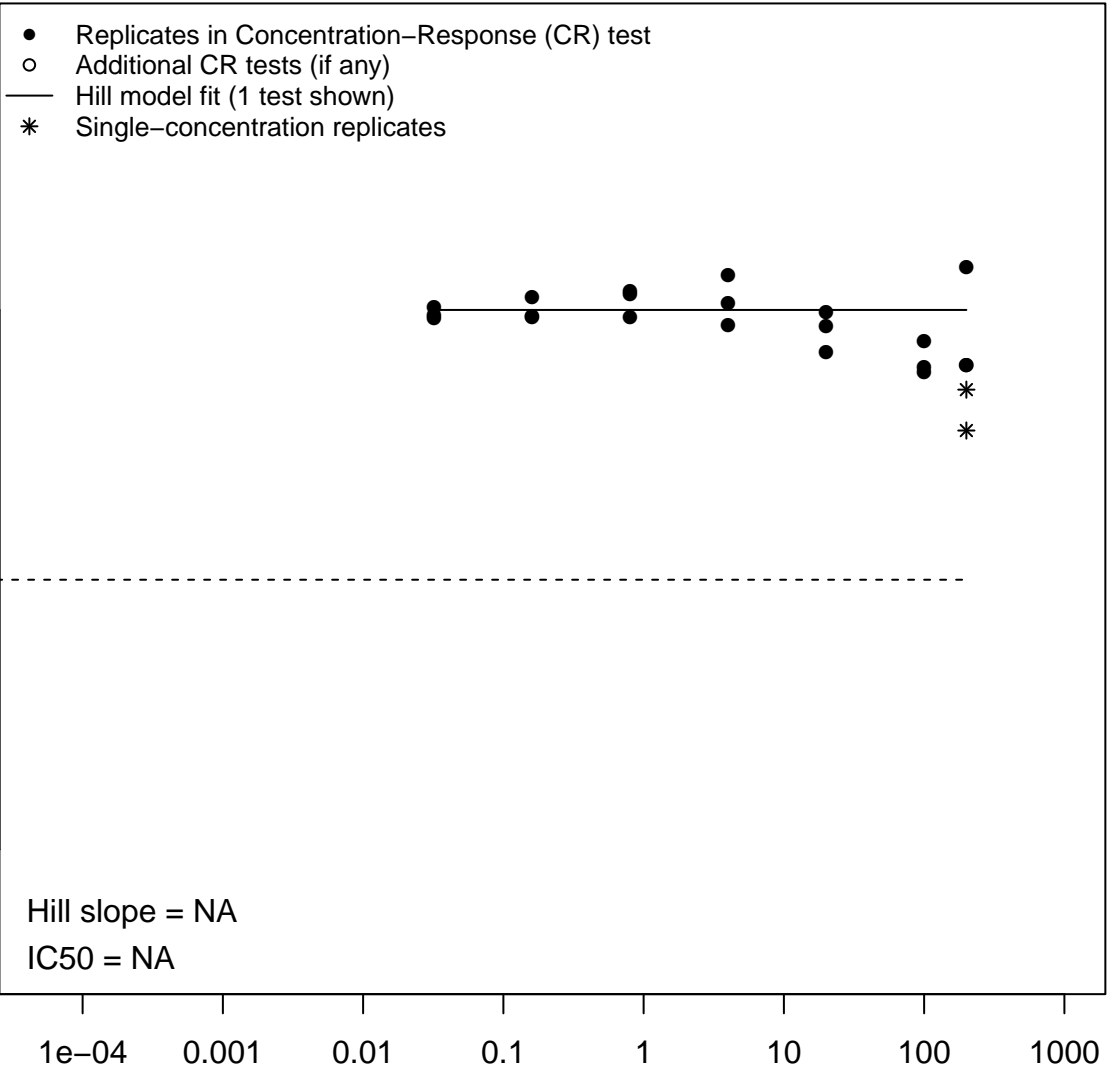

# Prochloraz

CASRN: 67747-09-5

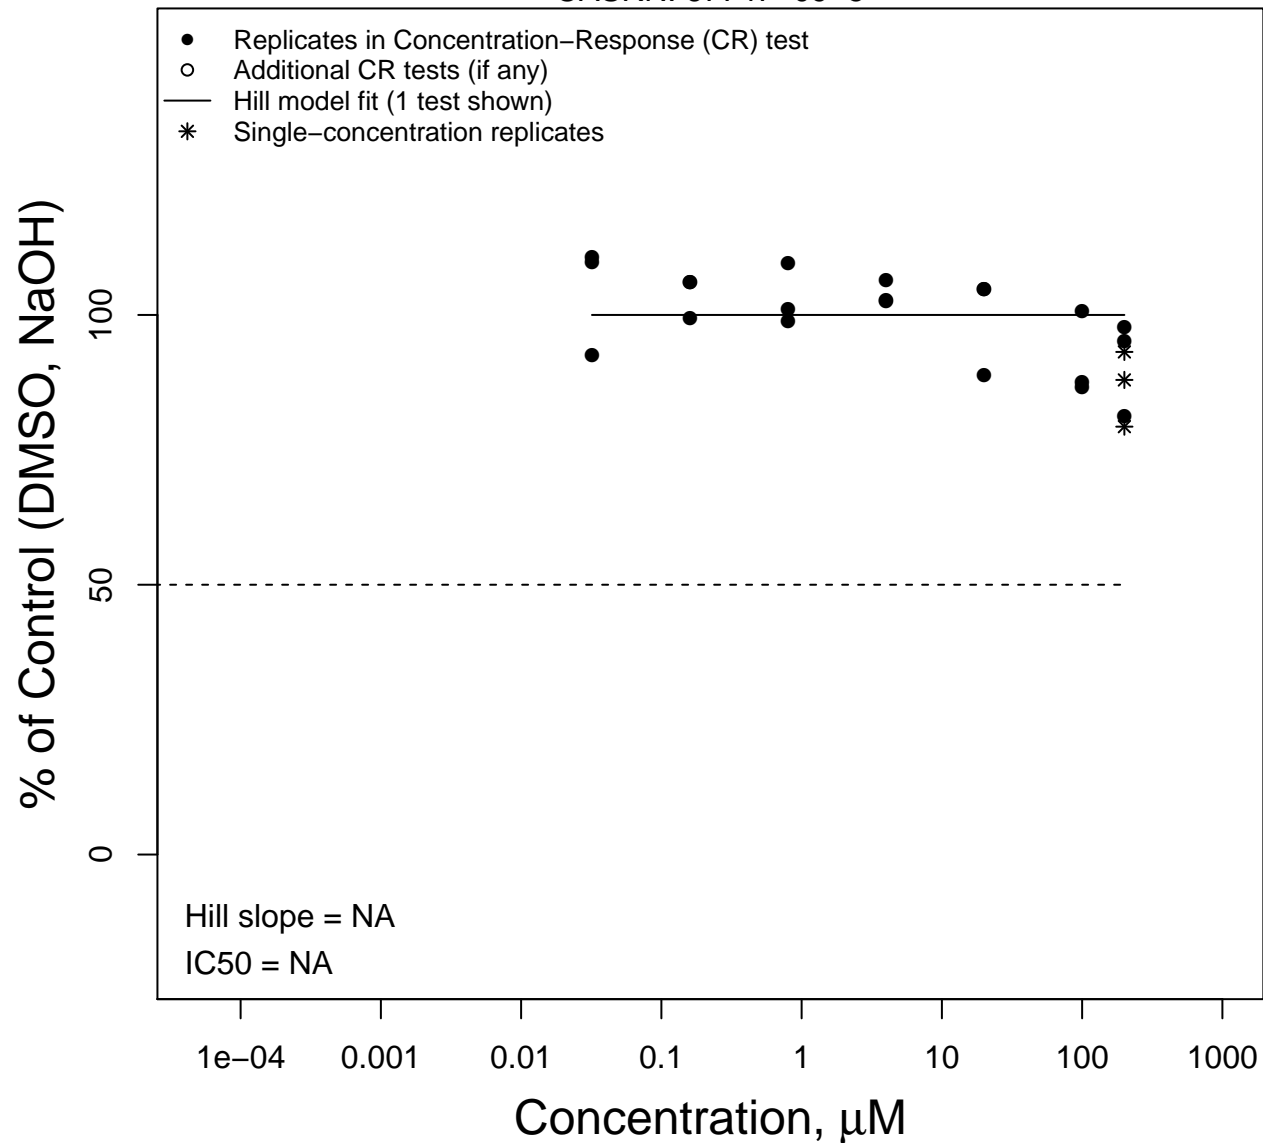



# Perfluorooctanesulfonic acid

CASRN: 1763-23-1

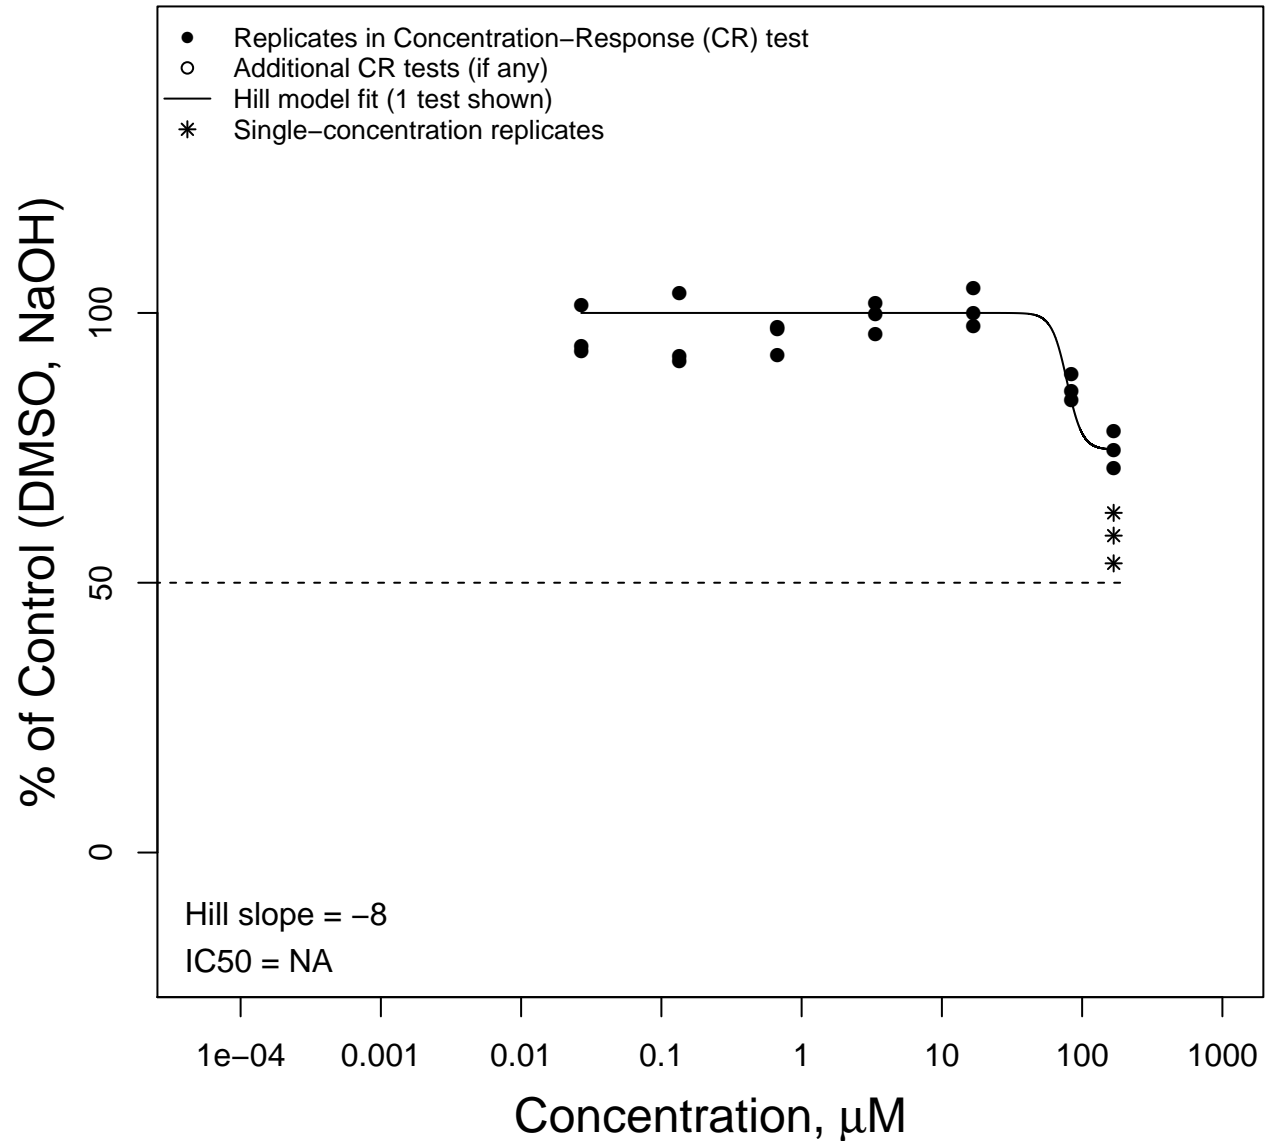

# Fenoxaprop-ethyl

CASRN: 66441-23-4

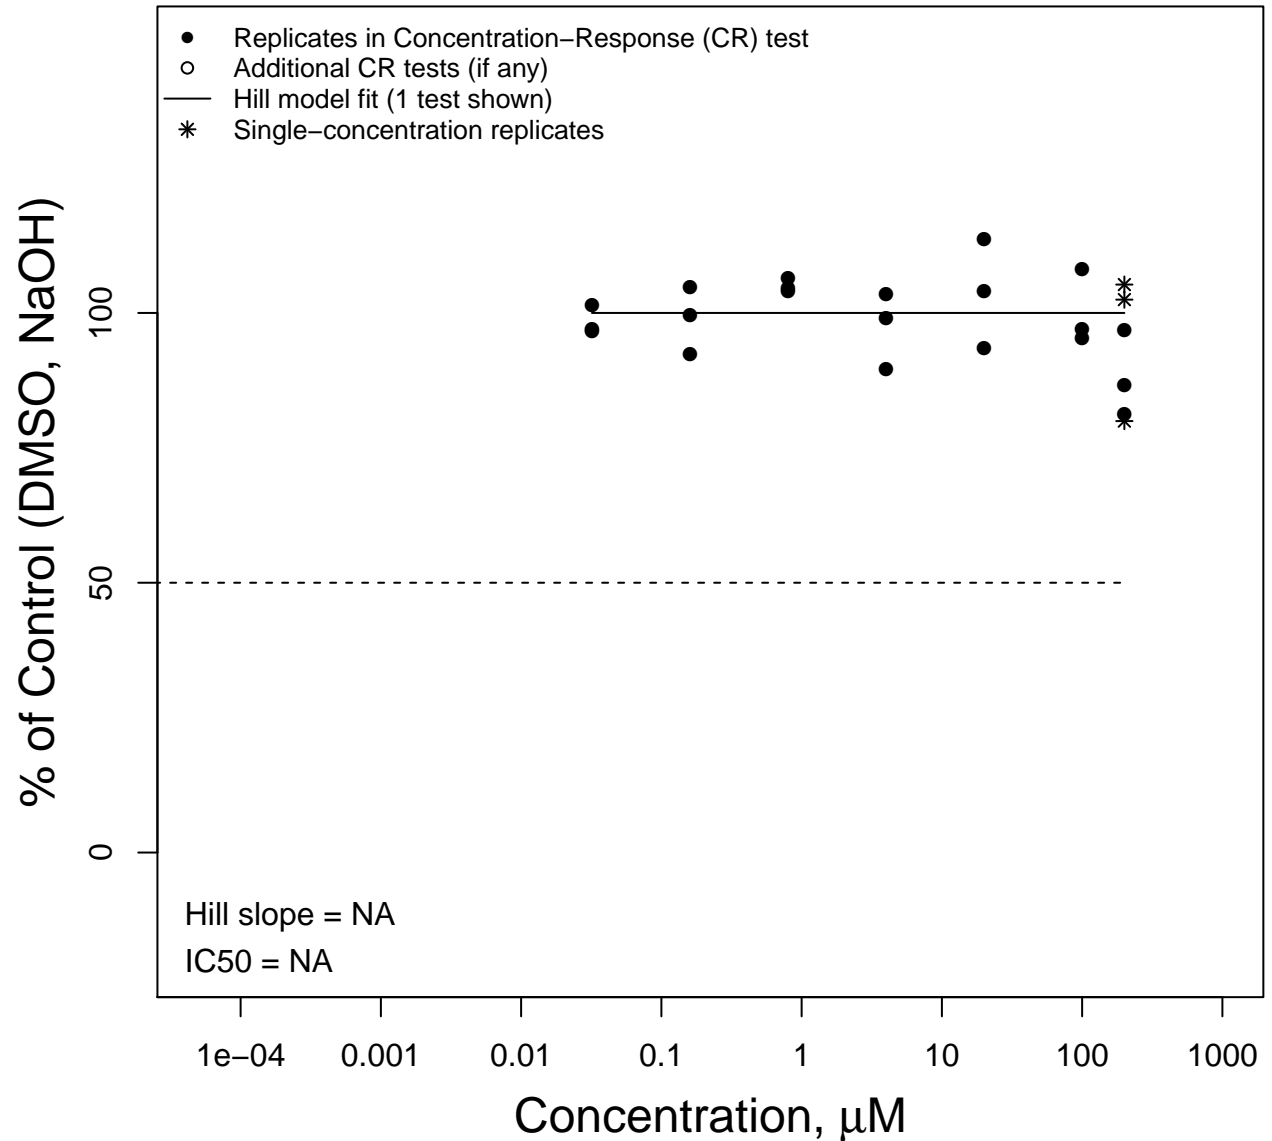

# Dicofol

CASRN: 115-32-2

- Replicates in Concentration-Response (CR) test
- Additional CR tests (if any)
- Hill model fit (1 test shown)
- \* Single-concentration replicates

% of Control (DMSO, NaOH)

100

50

0

Hill slope = -1.4

IC50 = 220.7

1e-04

0.001

0.01

0.1

1

10

100

1000

Concentration,  $\mu\text{M}$

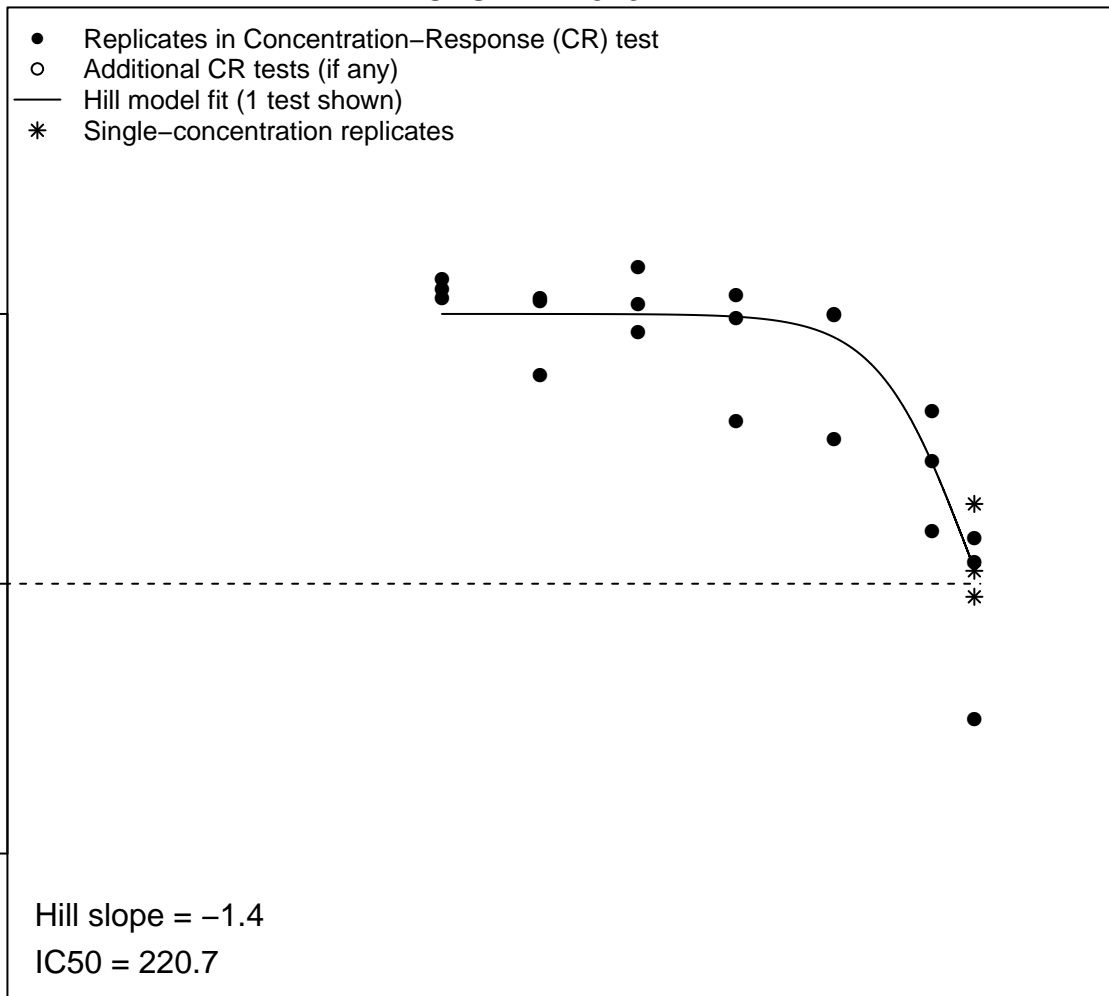

# Fenarimol

CASRN: 60168-88-9

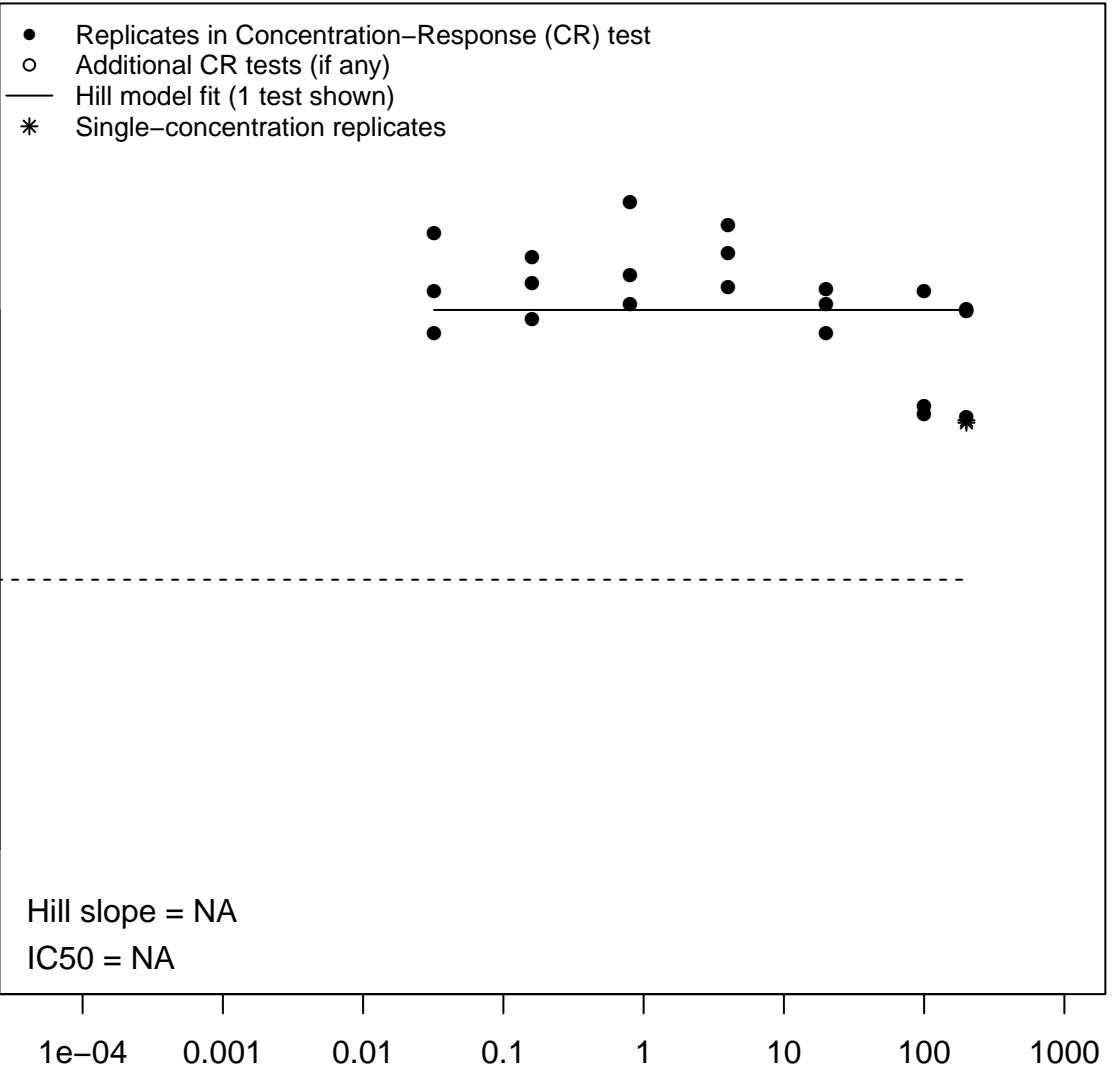

# Difenoconazole

CASRN: 119446-68-3

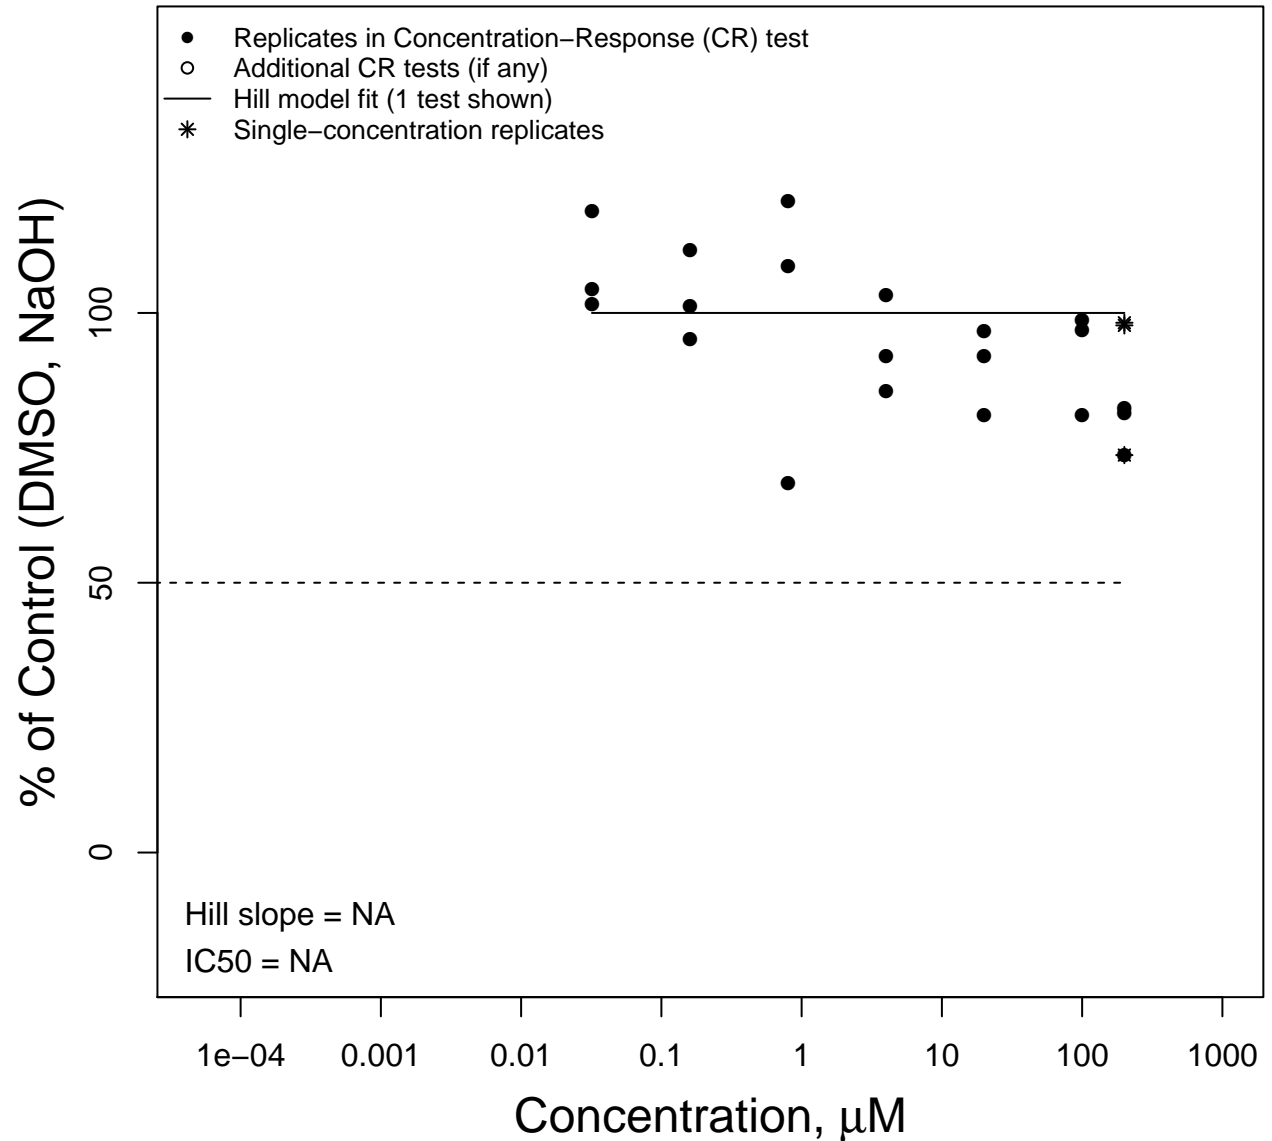

# Napropamide

CASRN: 15299-99-7

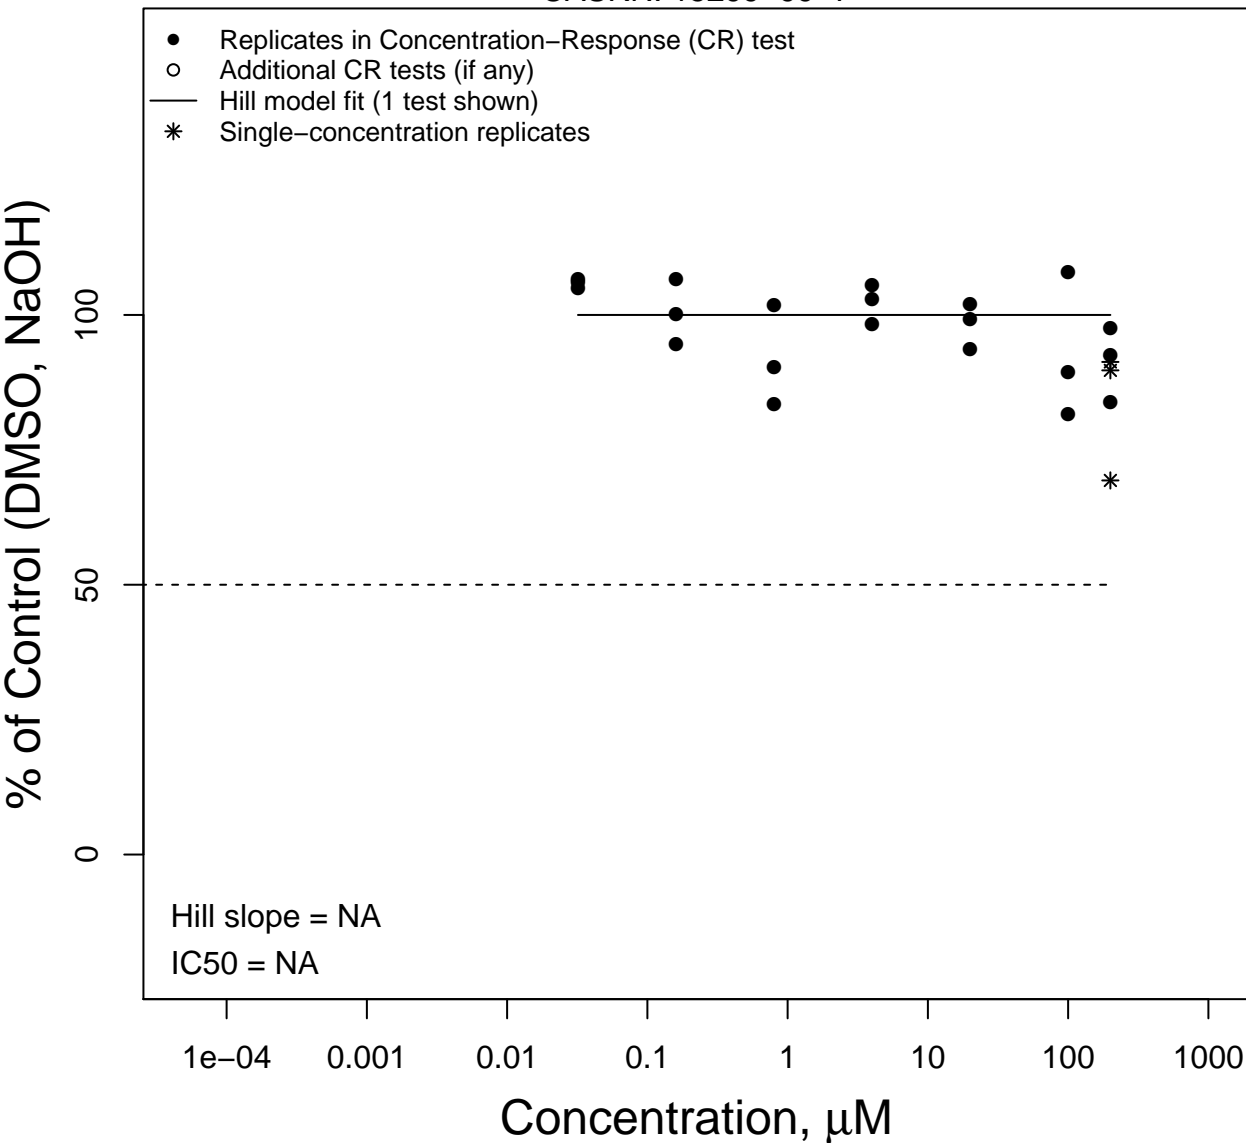

# Esfenvalerate

CASRN: 66230-04-4

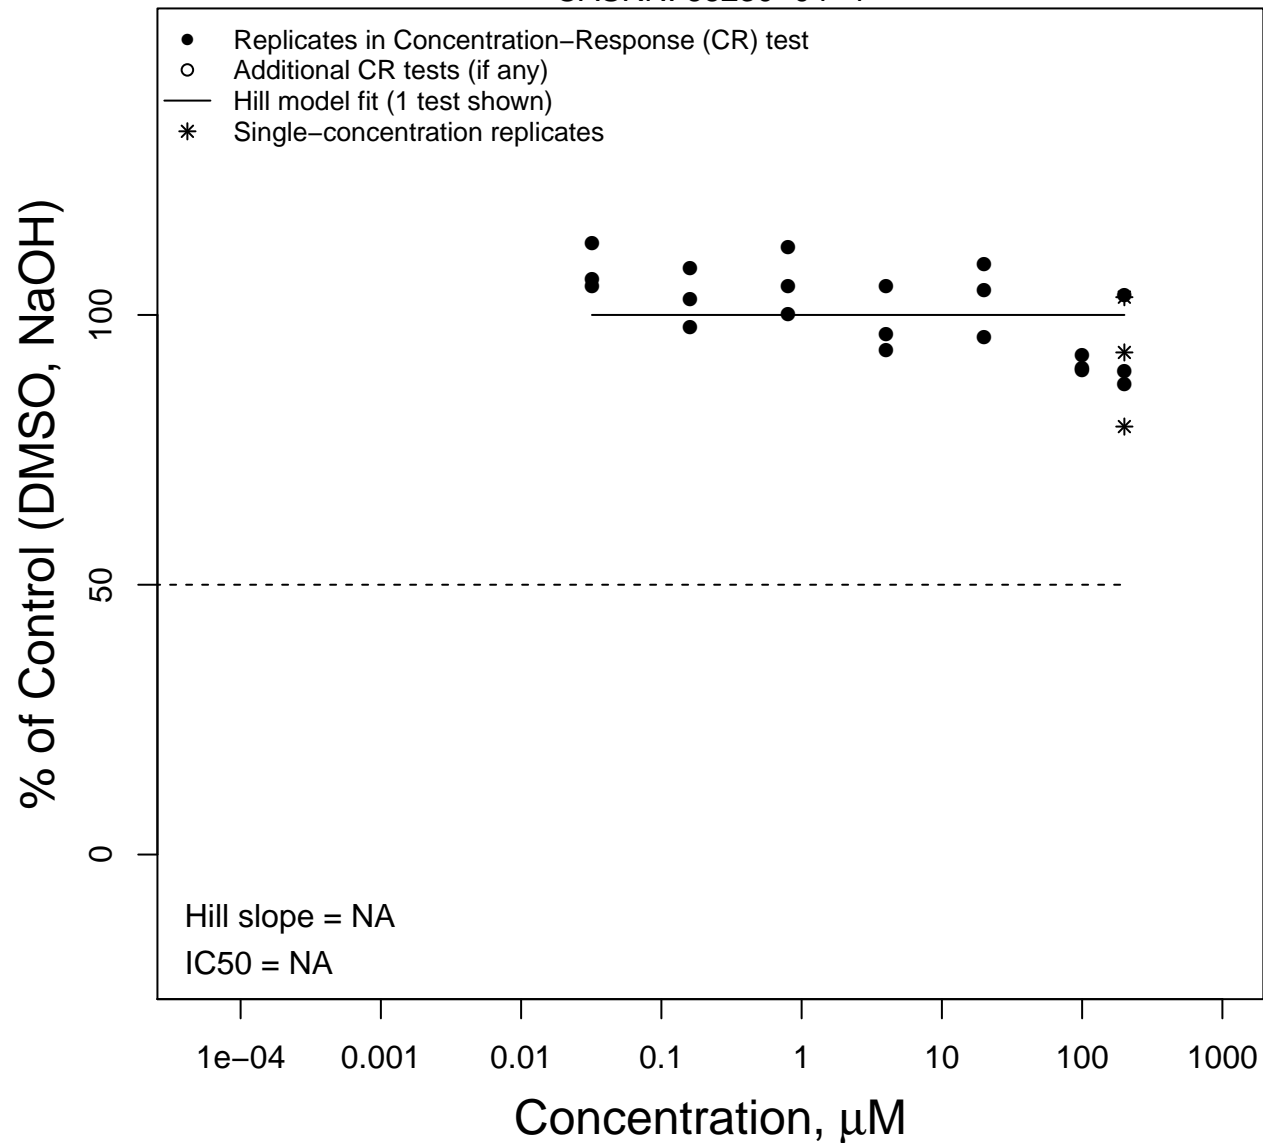

# Diquat dibromide monohydrate

CASRN: 6385-62-2

- Replicates in Concentration-Response (CR) test
- Additional CR tests (if any)
- Hill model fit (1 test shown)
- \* Single-concentration replicates

% of Control (DMSO, NaOH)

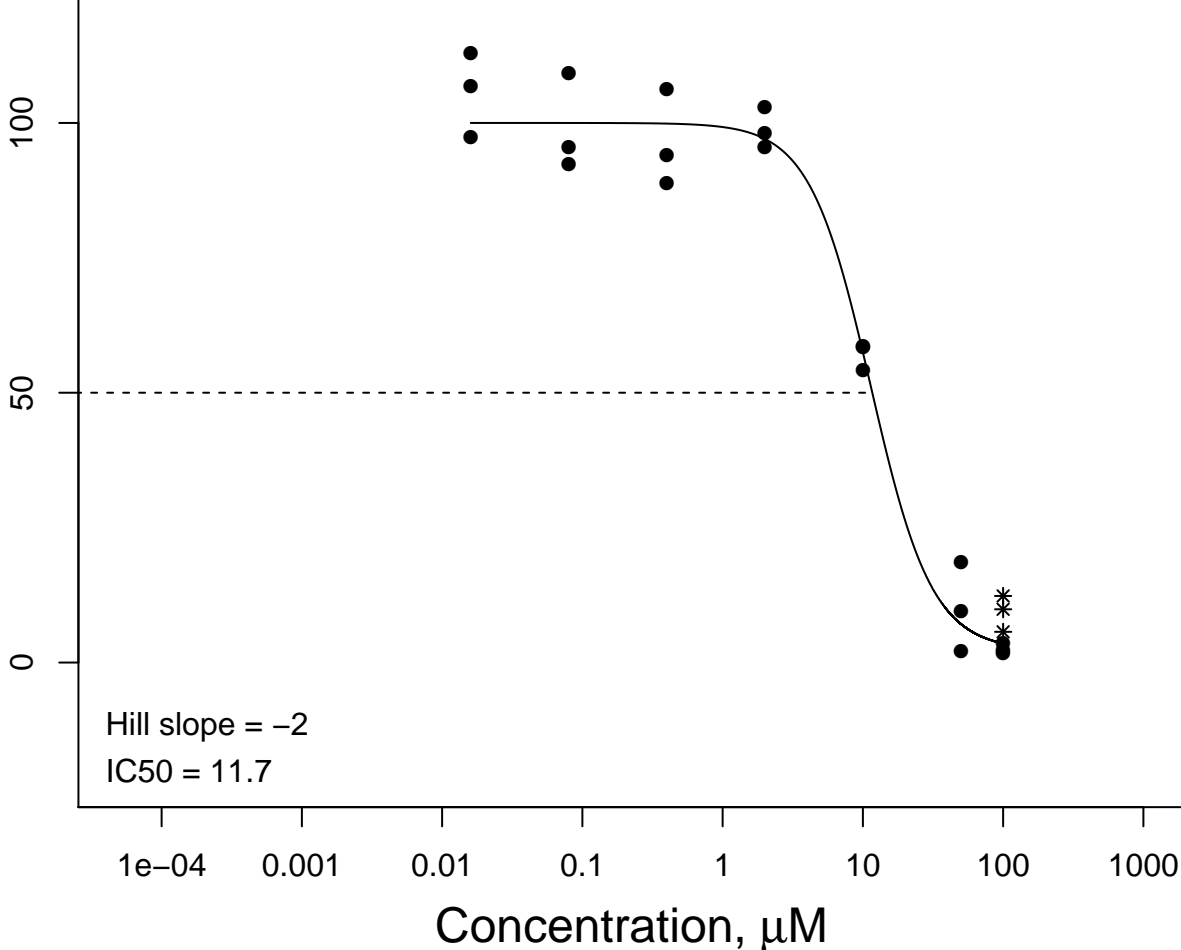



# Diazoxon

CASRN: 962-58-3

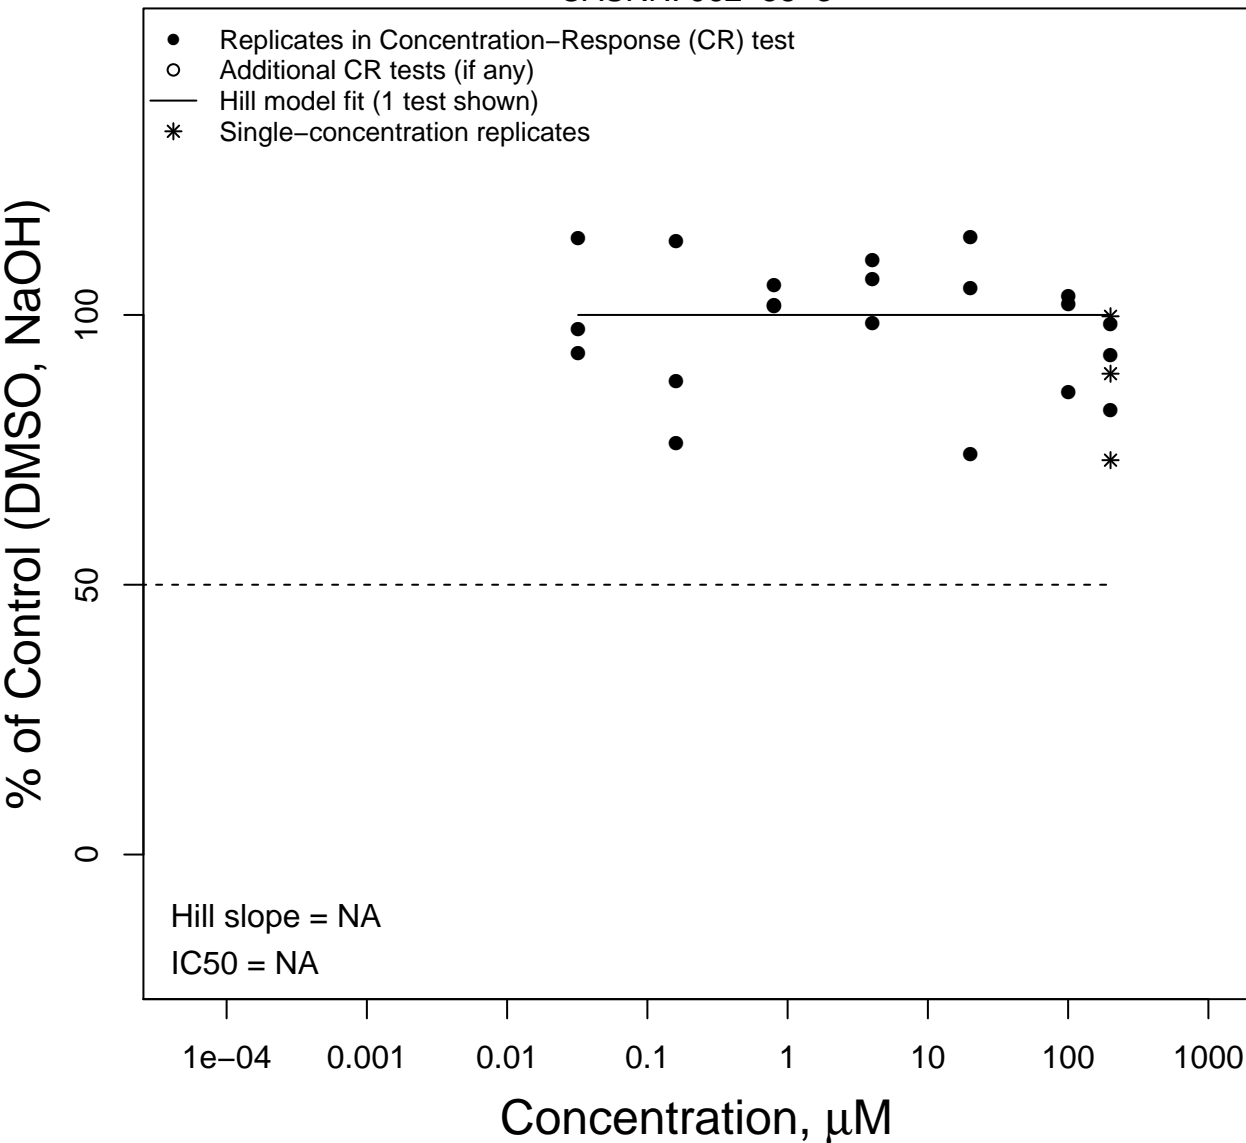



# Flutolanil

CASRN: 66332-96-5

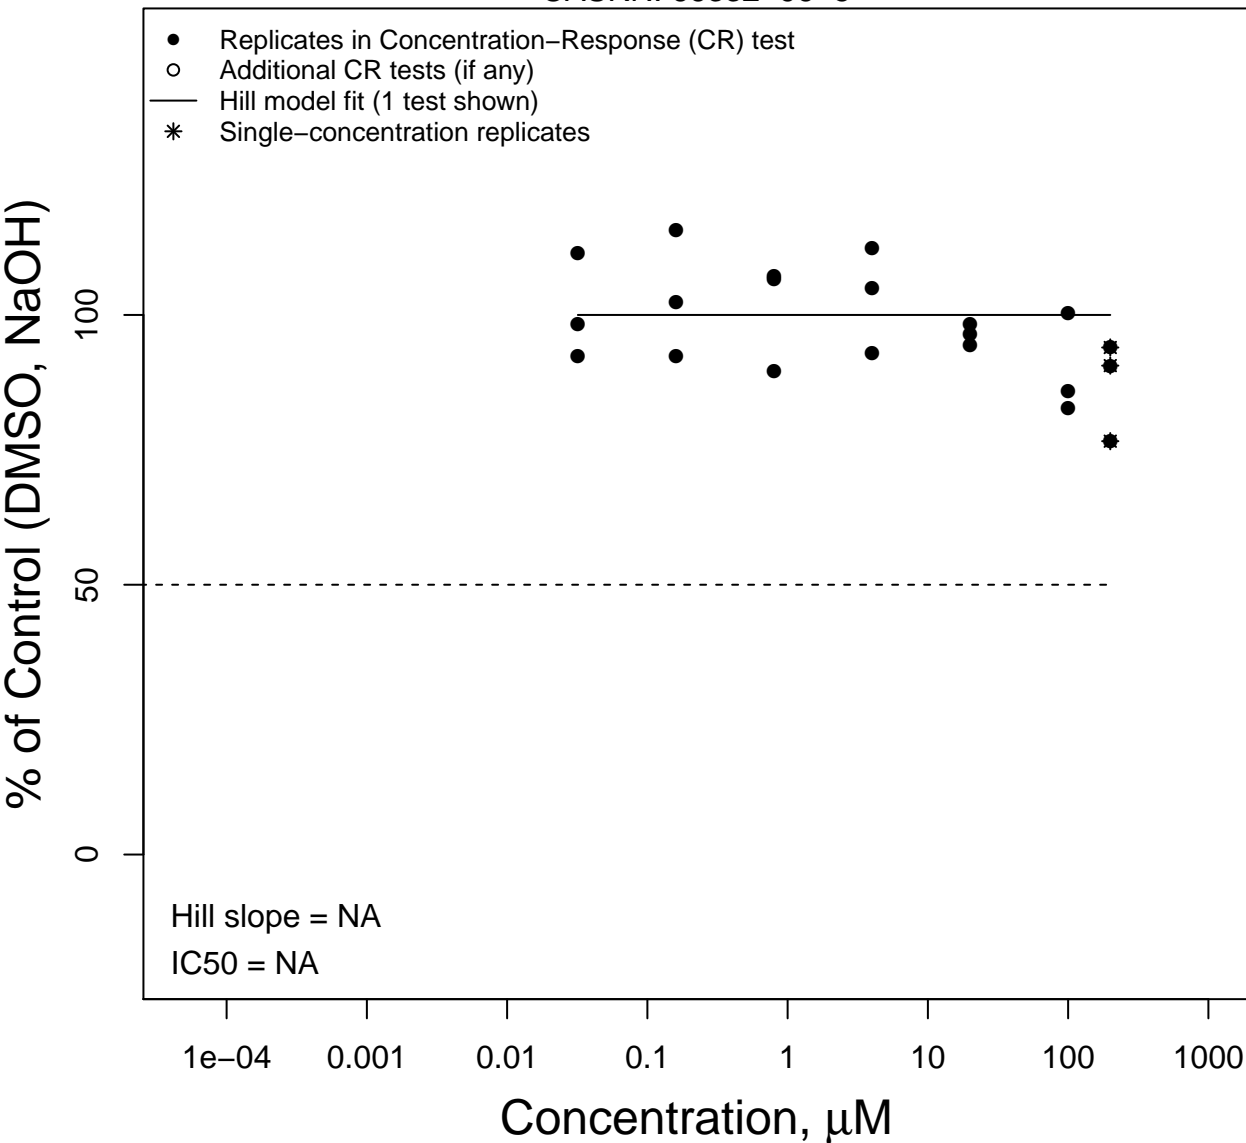

# 1,2-Dinitrobenzene

CASRN: 528-29-0

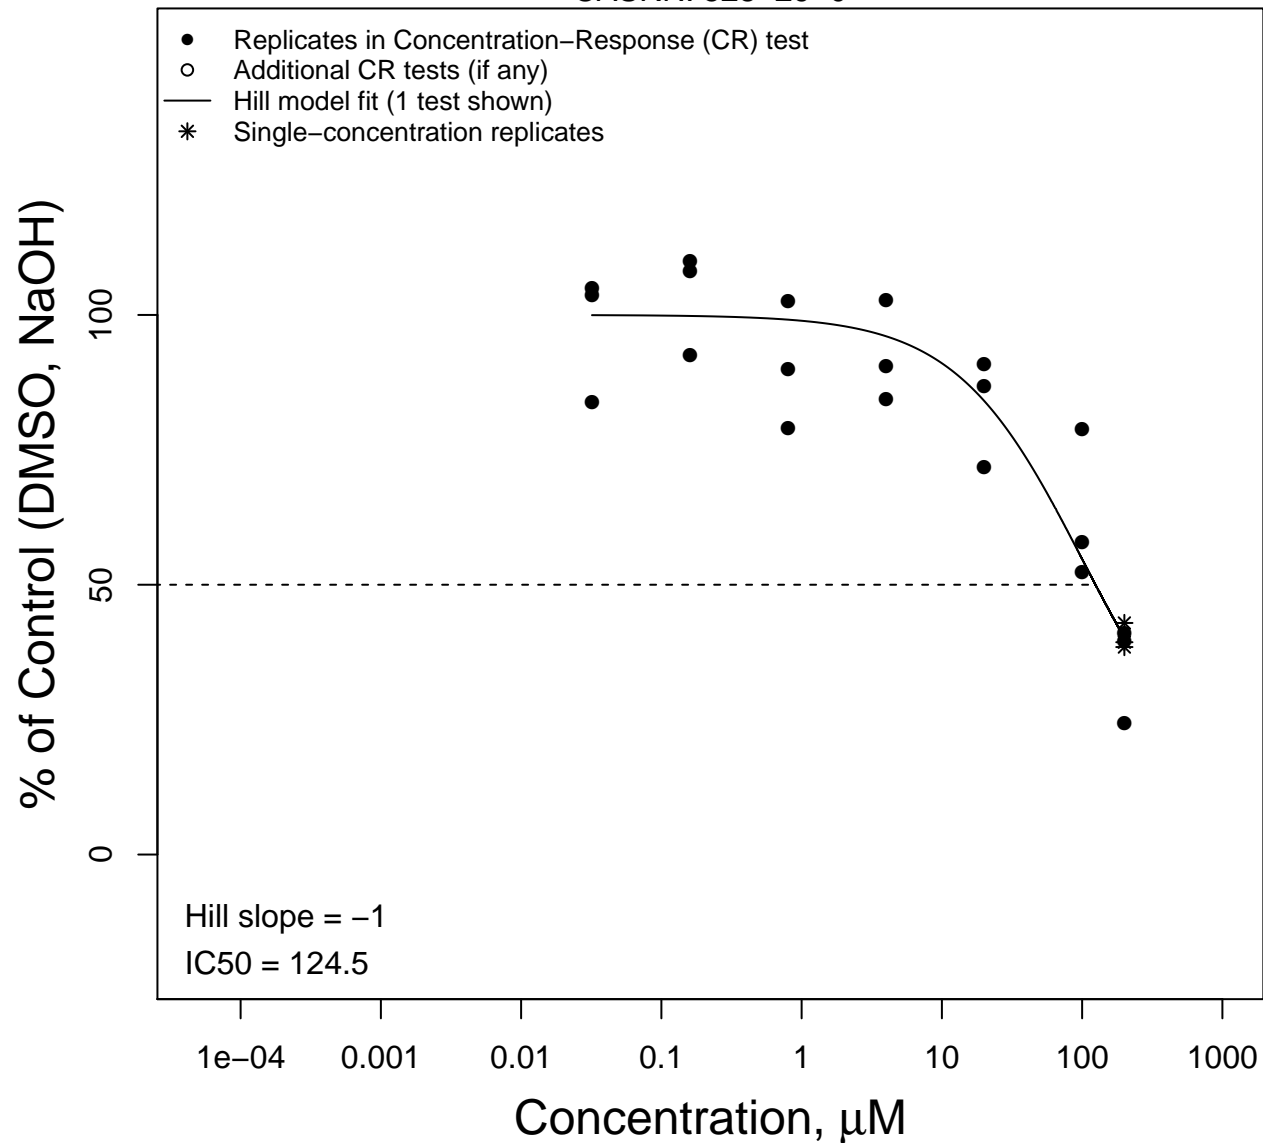

# Bisphenol A

CASRN: 80-05-7

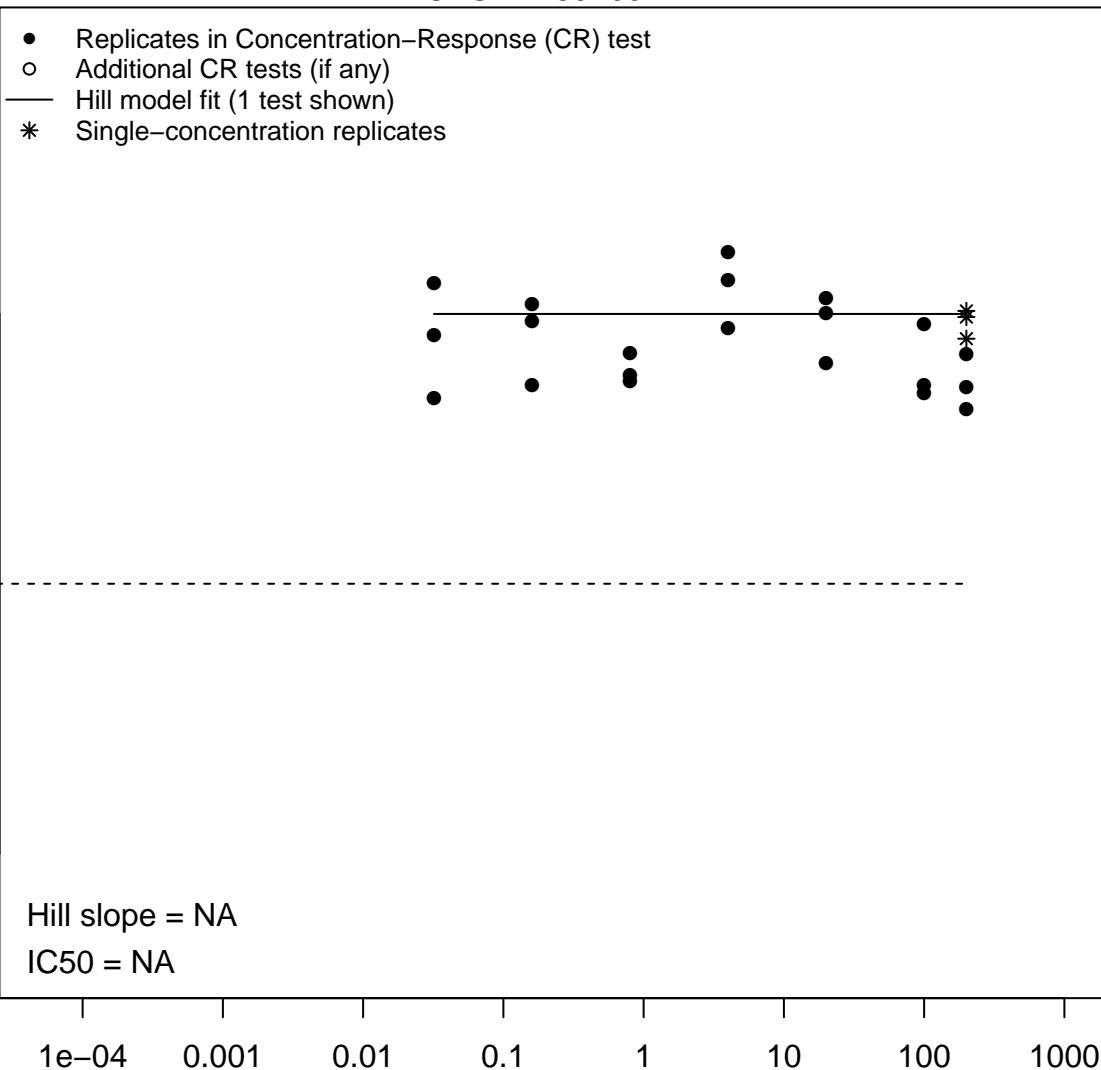

# 1,2-Benzenedicarboxaldehyde

CASRN: 643-79-8

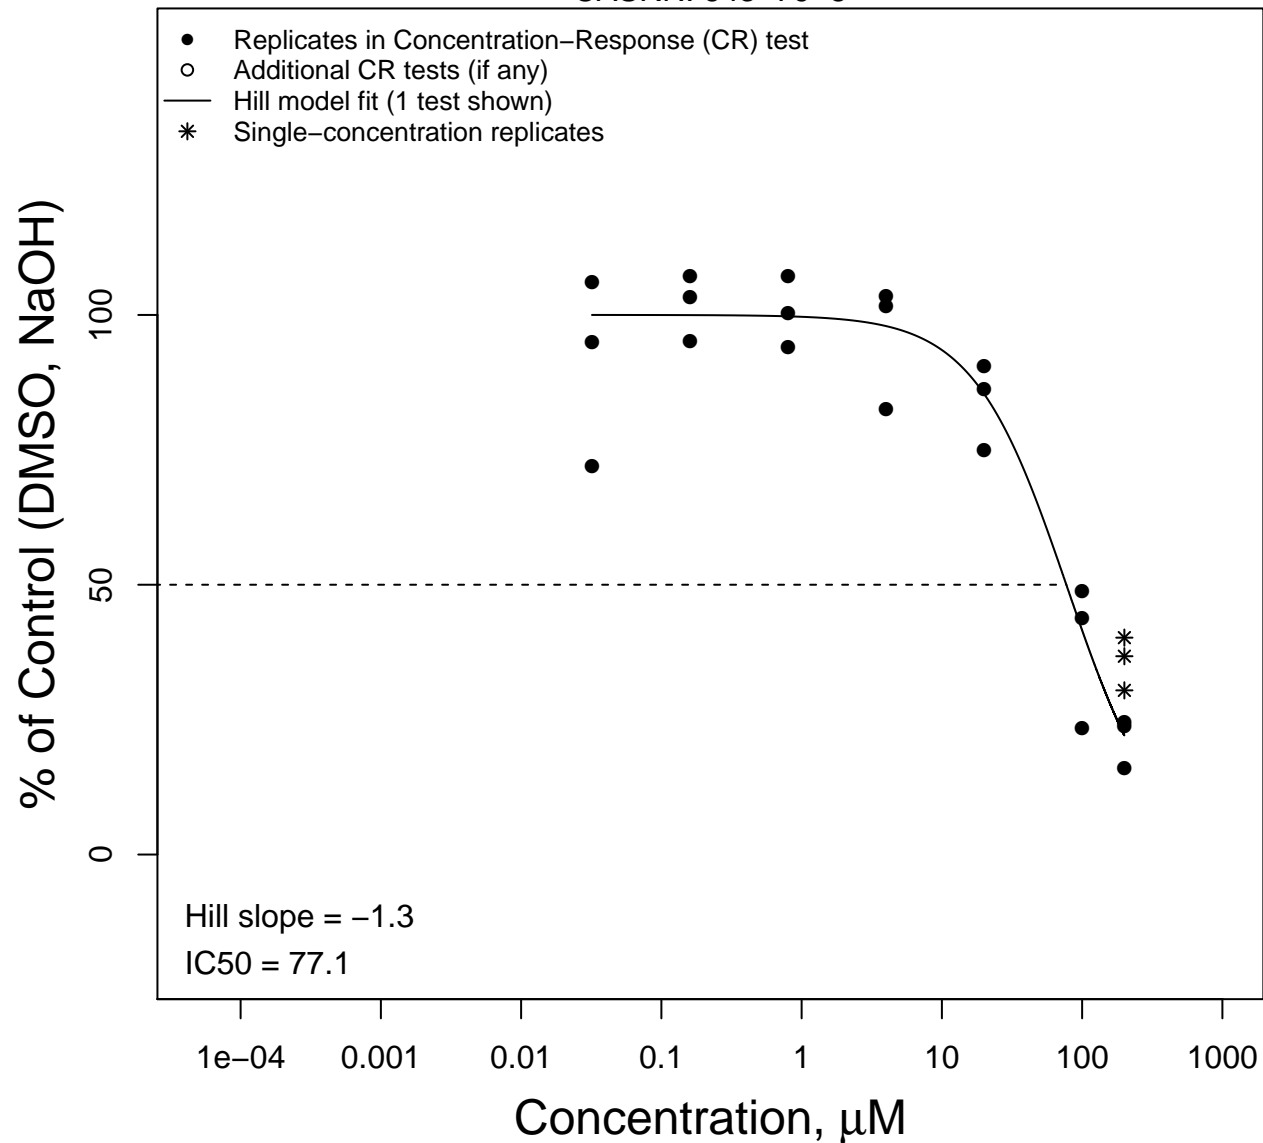

1,3-Dichloro-6,7,8,9,10,12-hexahydroazepino[2,1-b]quinazoline hydrochloride (1:1)

CASRN: 149062-75-9

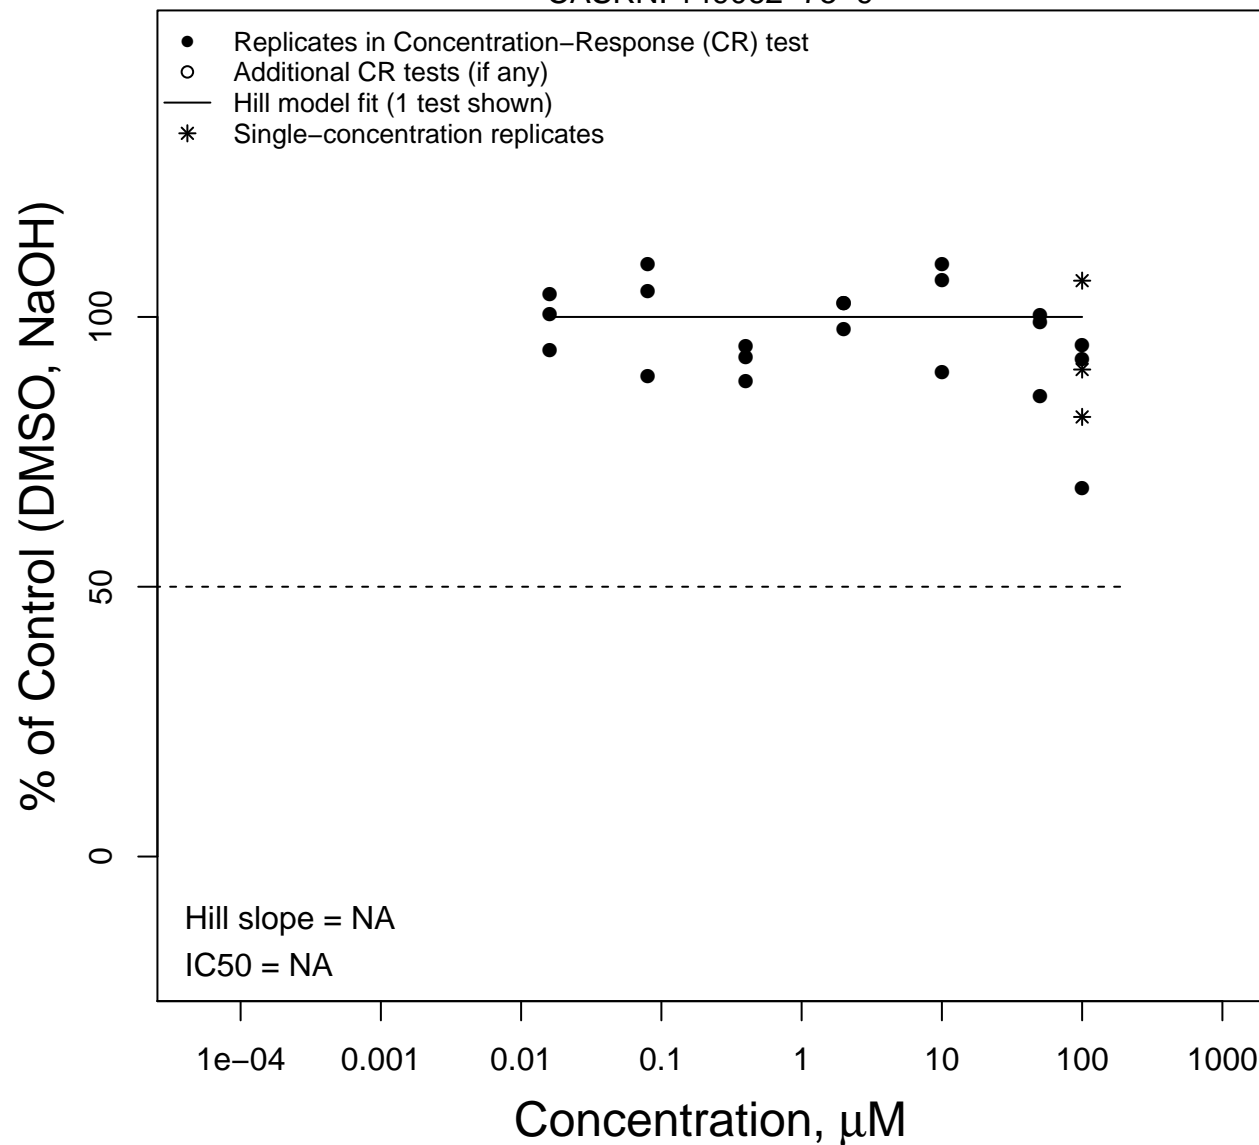

# 2-Mercaptobenzothiazole

CASRN: 149-30-4

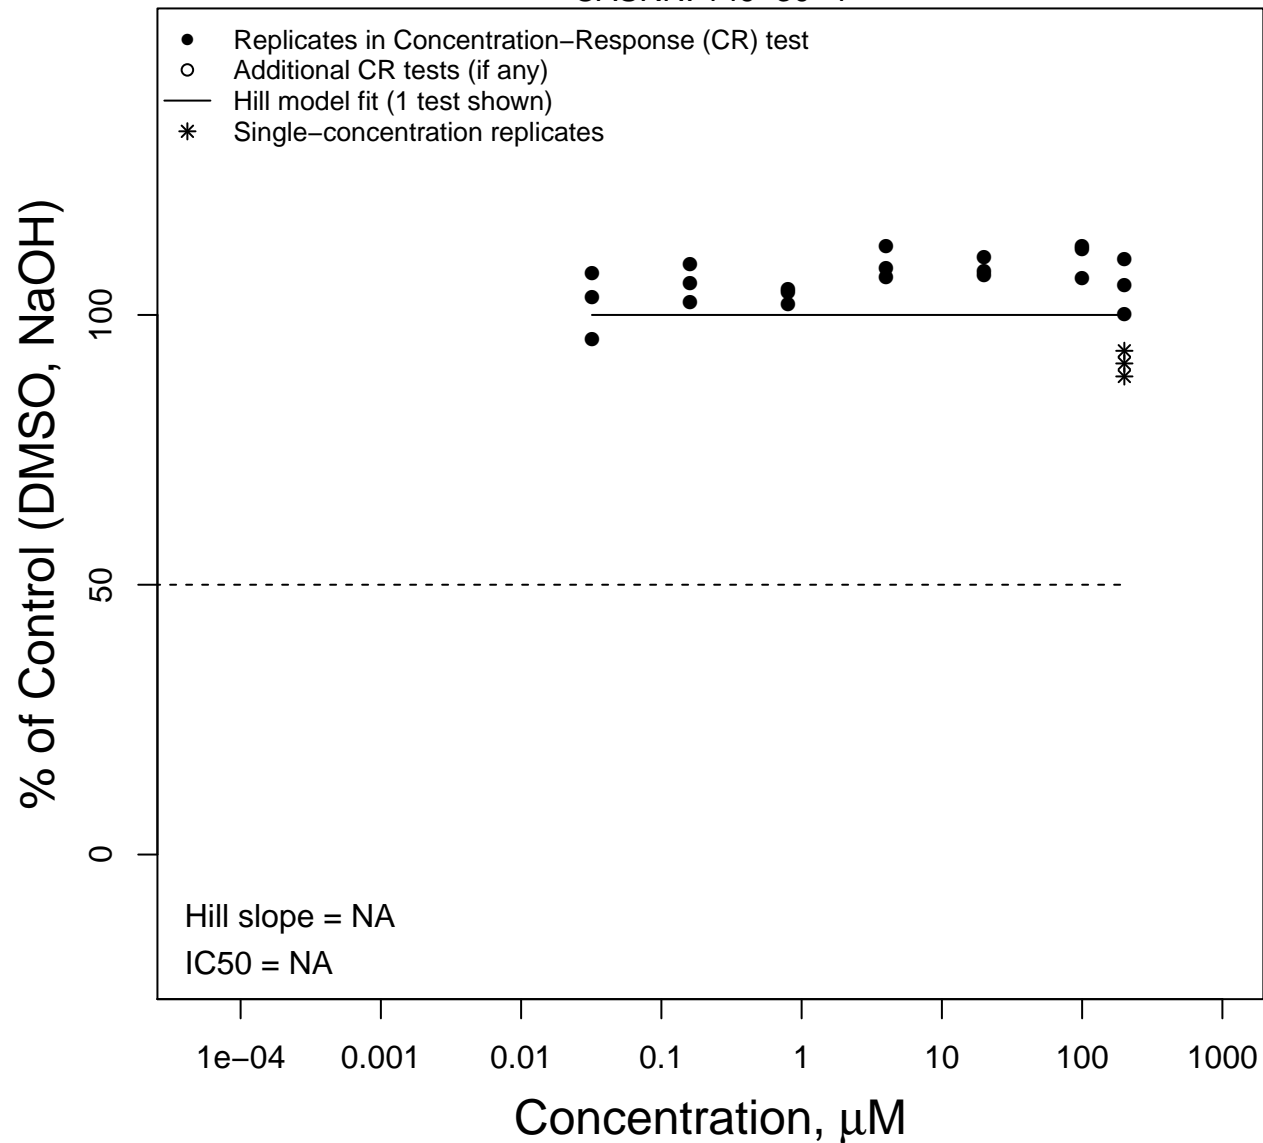



# 2,4,5-Trichlorophenol

CASRN: 95-95-4

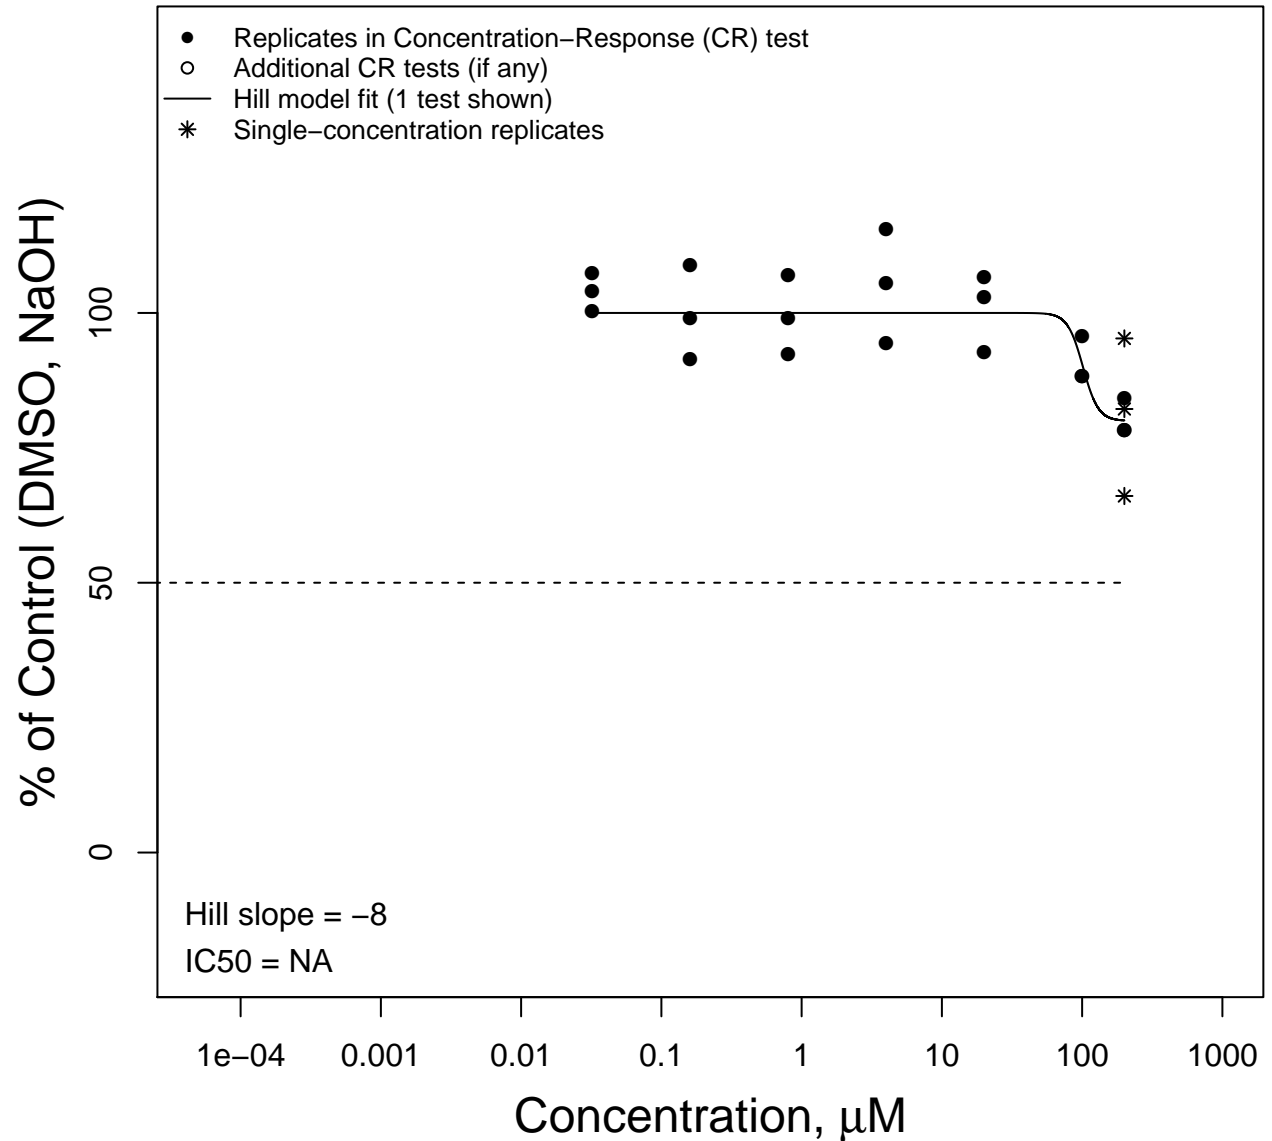

# 2,4-Bis(1-methyl-1-phenylethyl)phenol

CASRN: 2772-45-4

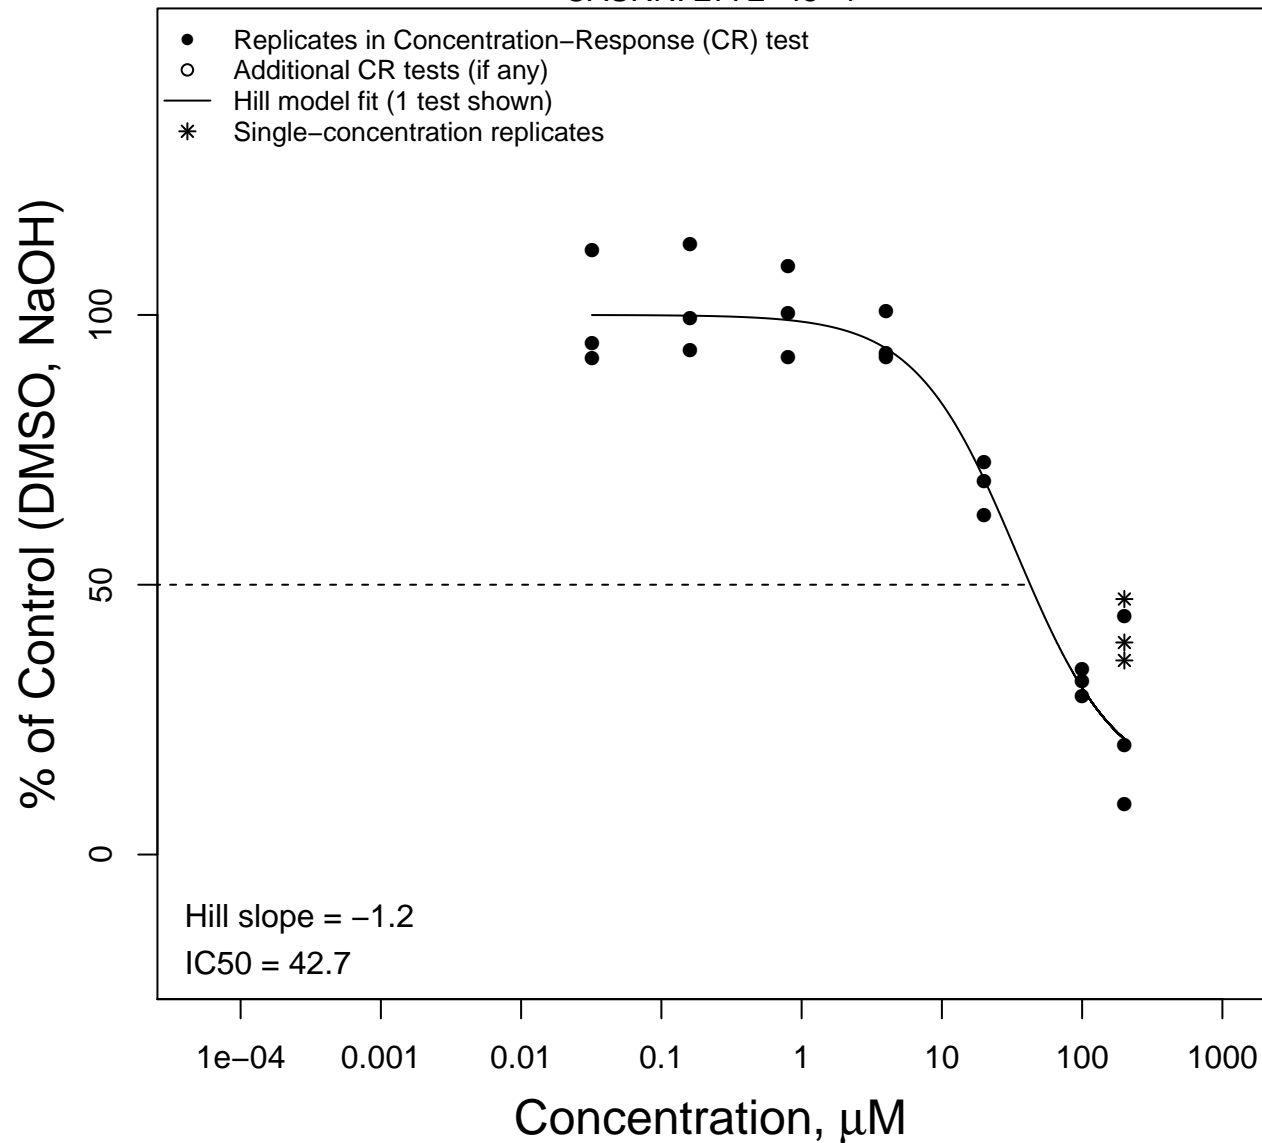

# 2,6-Di-tert-butylphenol

CASRN: 128-39-2

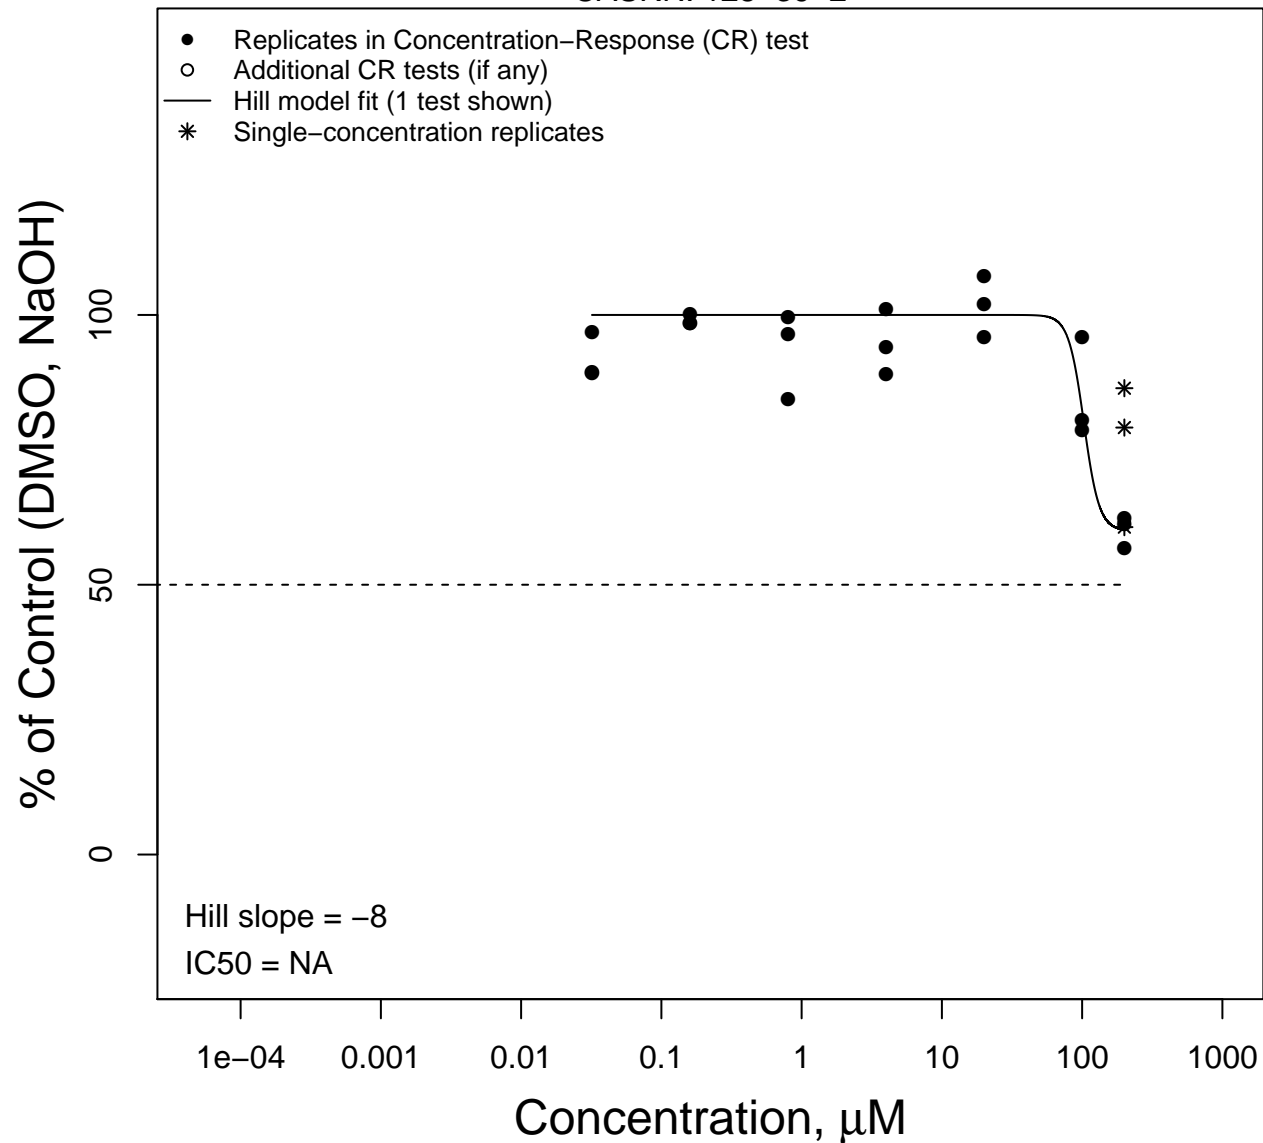

# 2,4-Di-tert-butylphenol

CASRN: 96-76-4

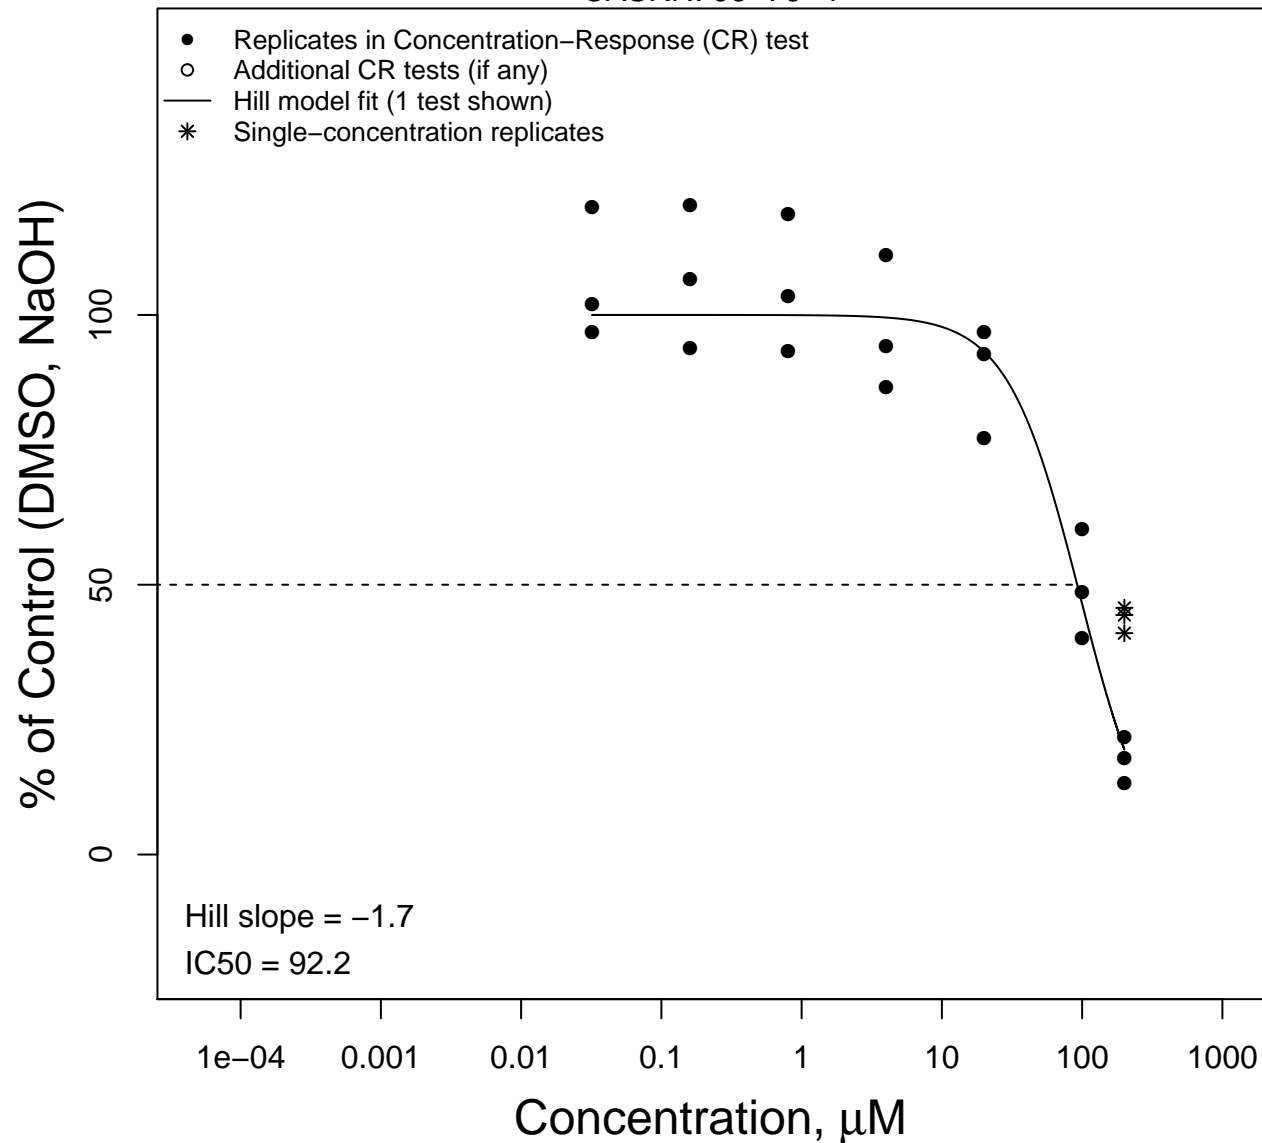

# 3,3',5,5'-Tetrabromobisphenol A

CASRN: 79-94-7

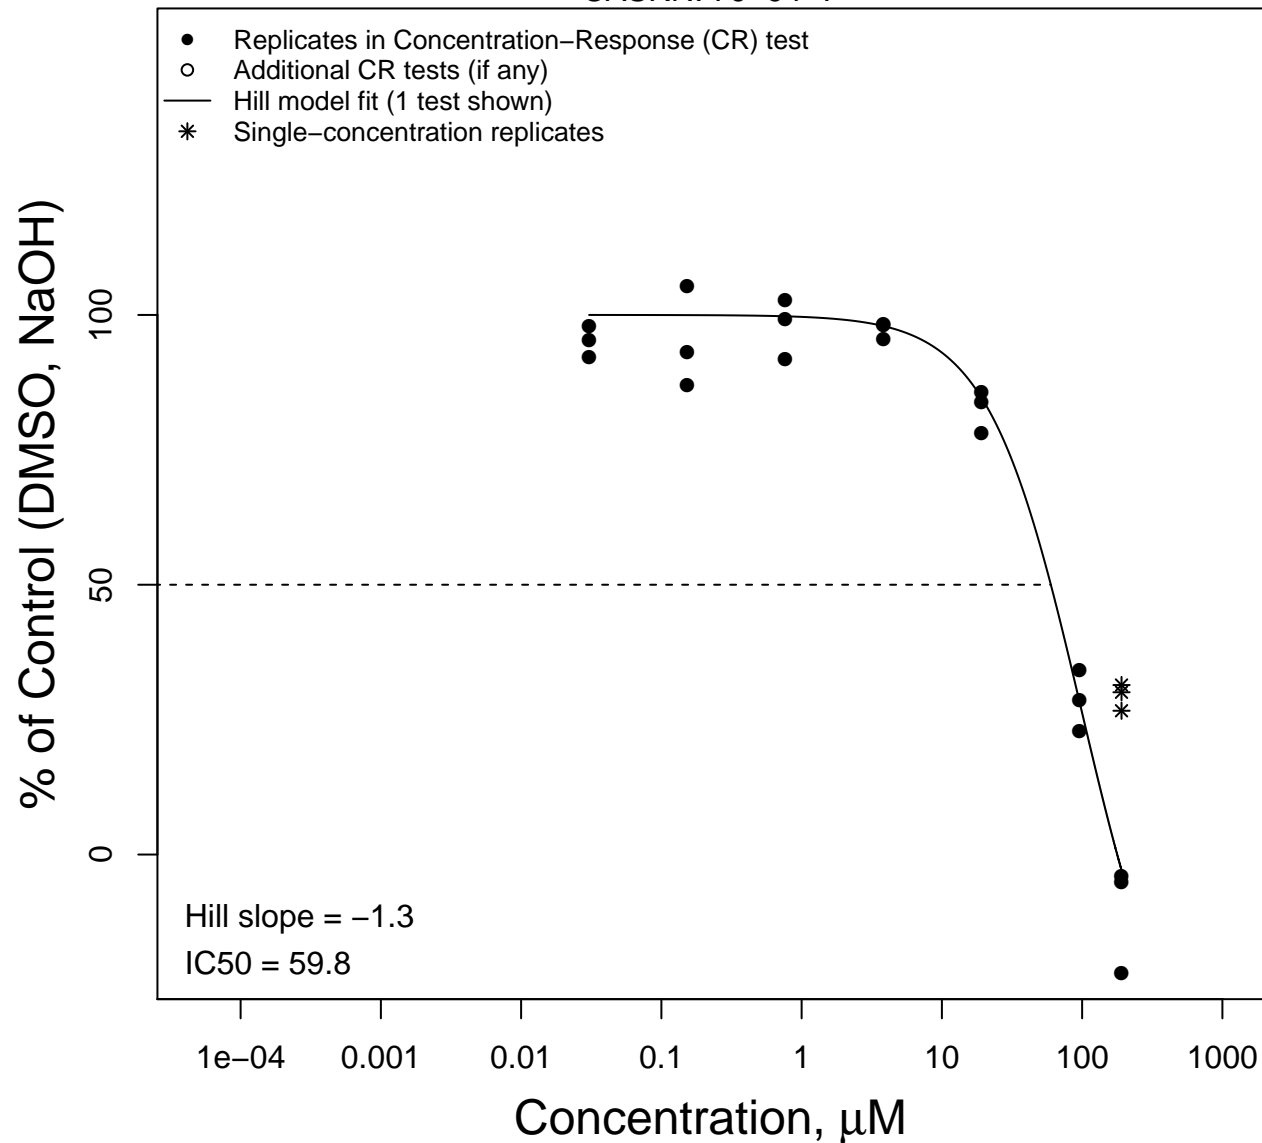

# 2,4-Di-tert-pentylphenol

CASRN: 120-95-6

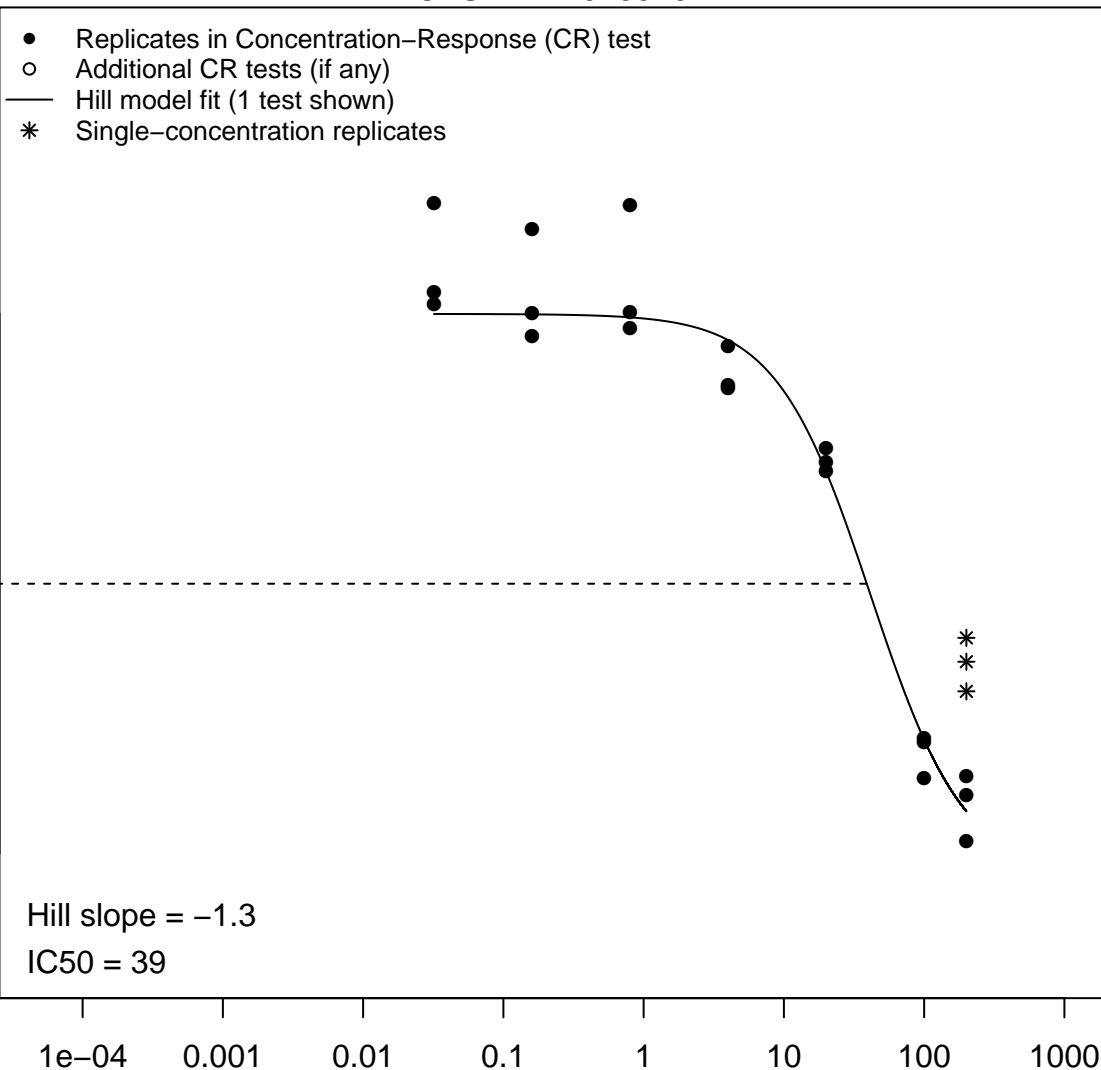

Concentration, µM

# Bromoxynil

CASRN: 1689-84-5

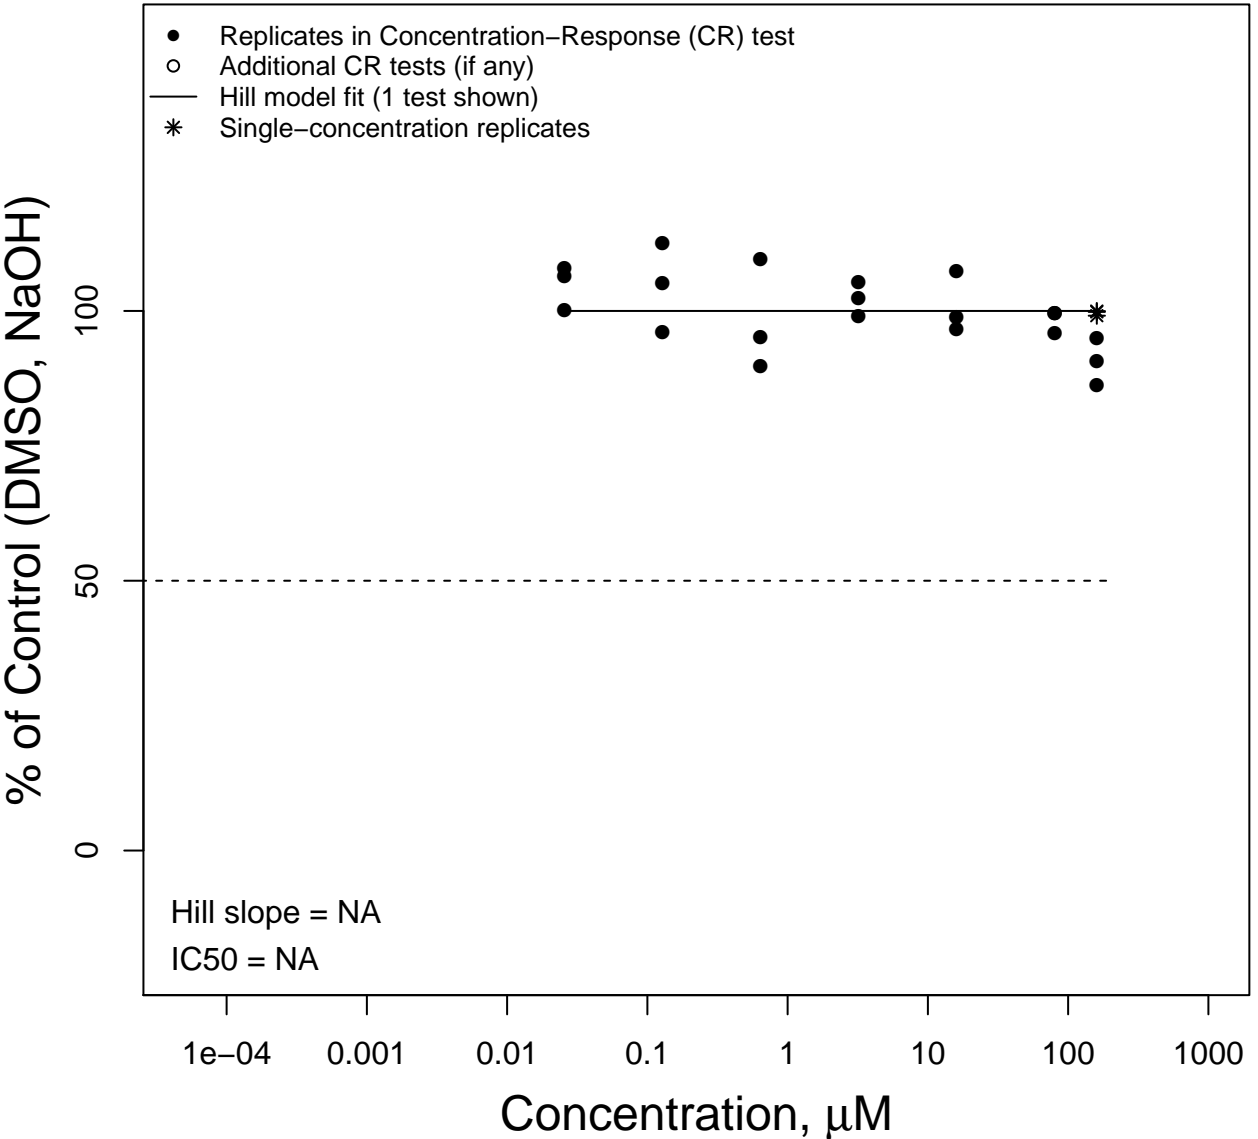

# D&C Red 27

CASRN: 13473-26-2

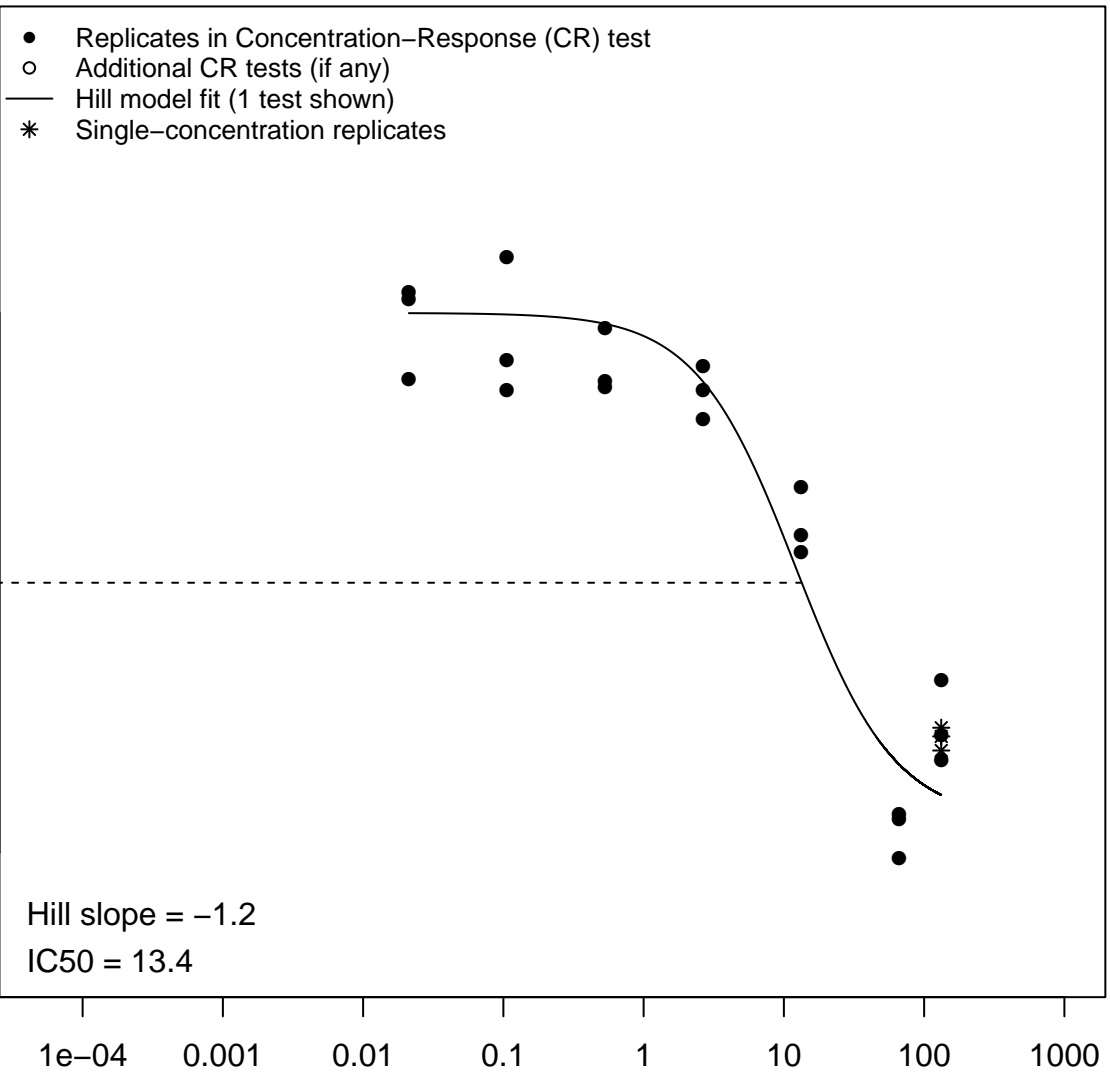

Concentration,  $\mu\text{M}$



# Fluorosalan

CASRN: 4776-06-1

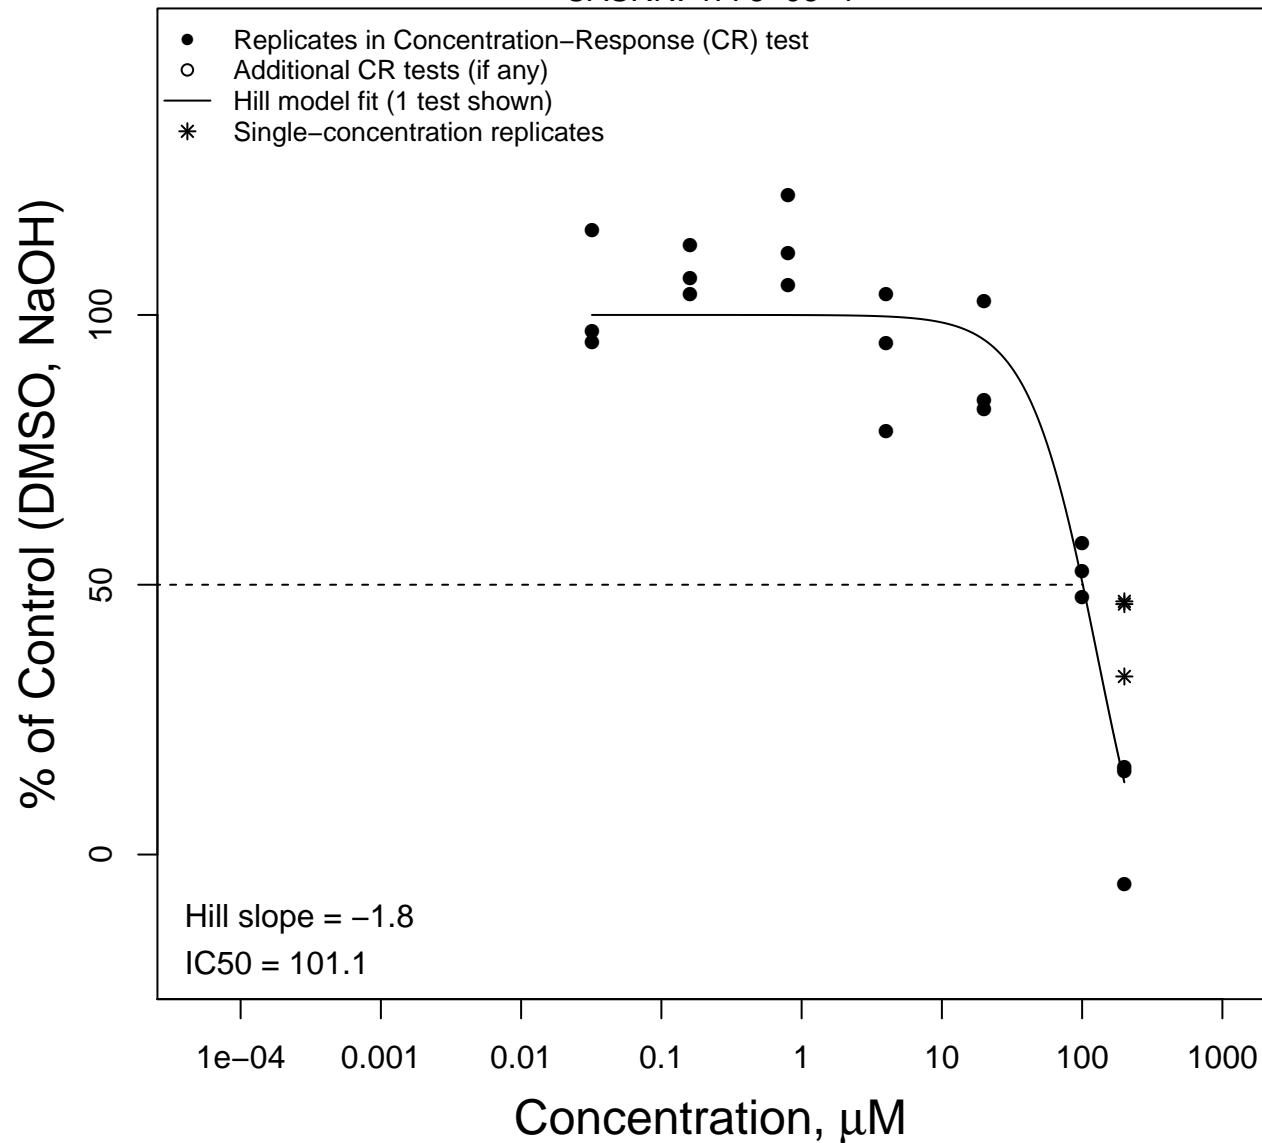

# 4-Octylphenol

CASRN: 1806-26-4

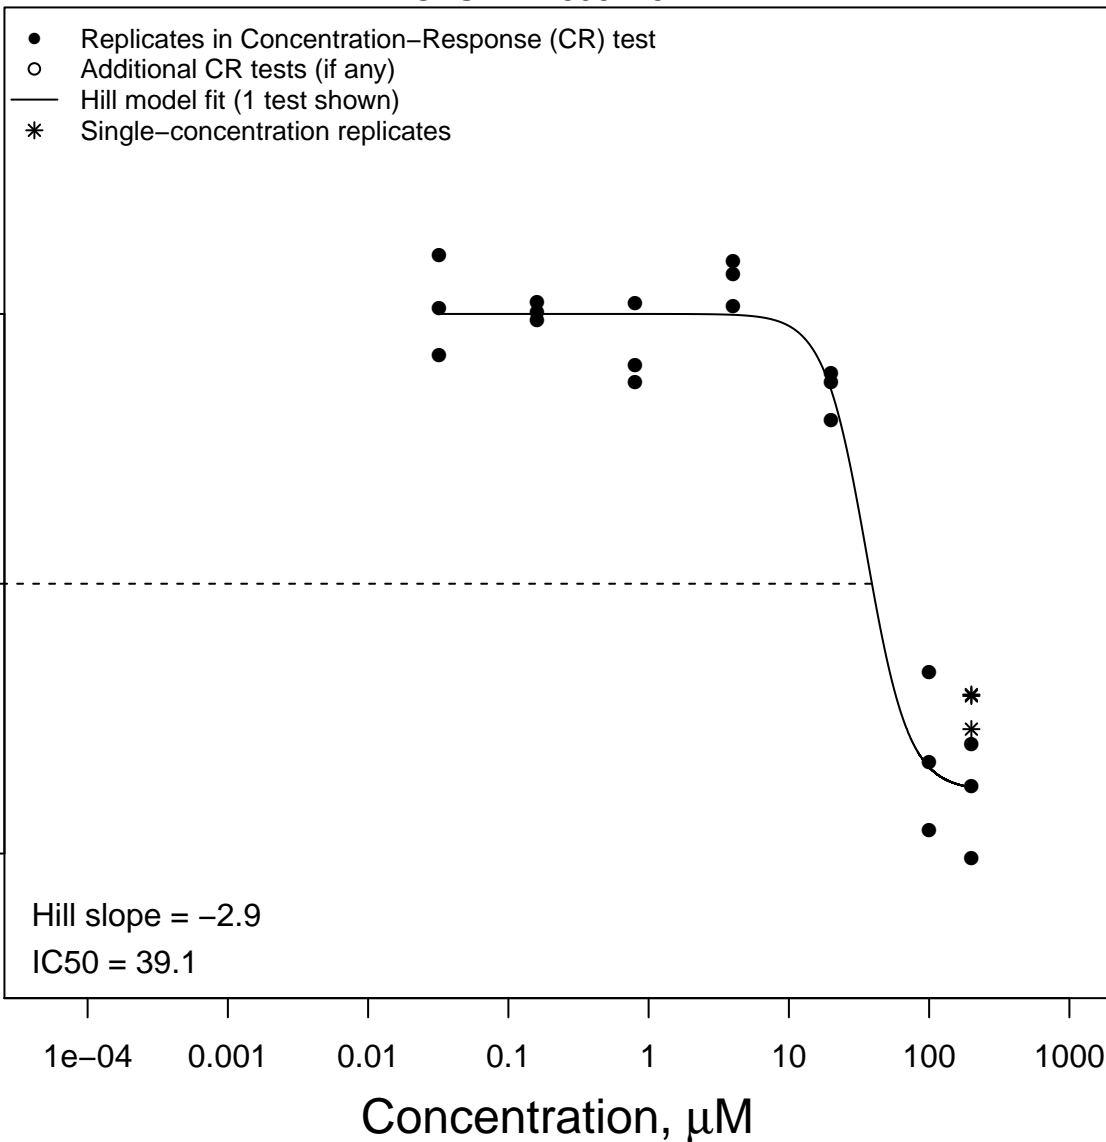

# 4-Nonylphenol, branched

CASRN: 84852-15-3

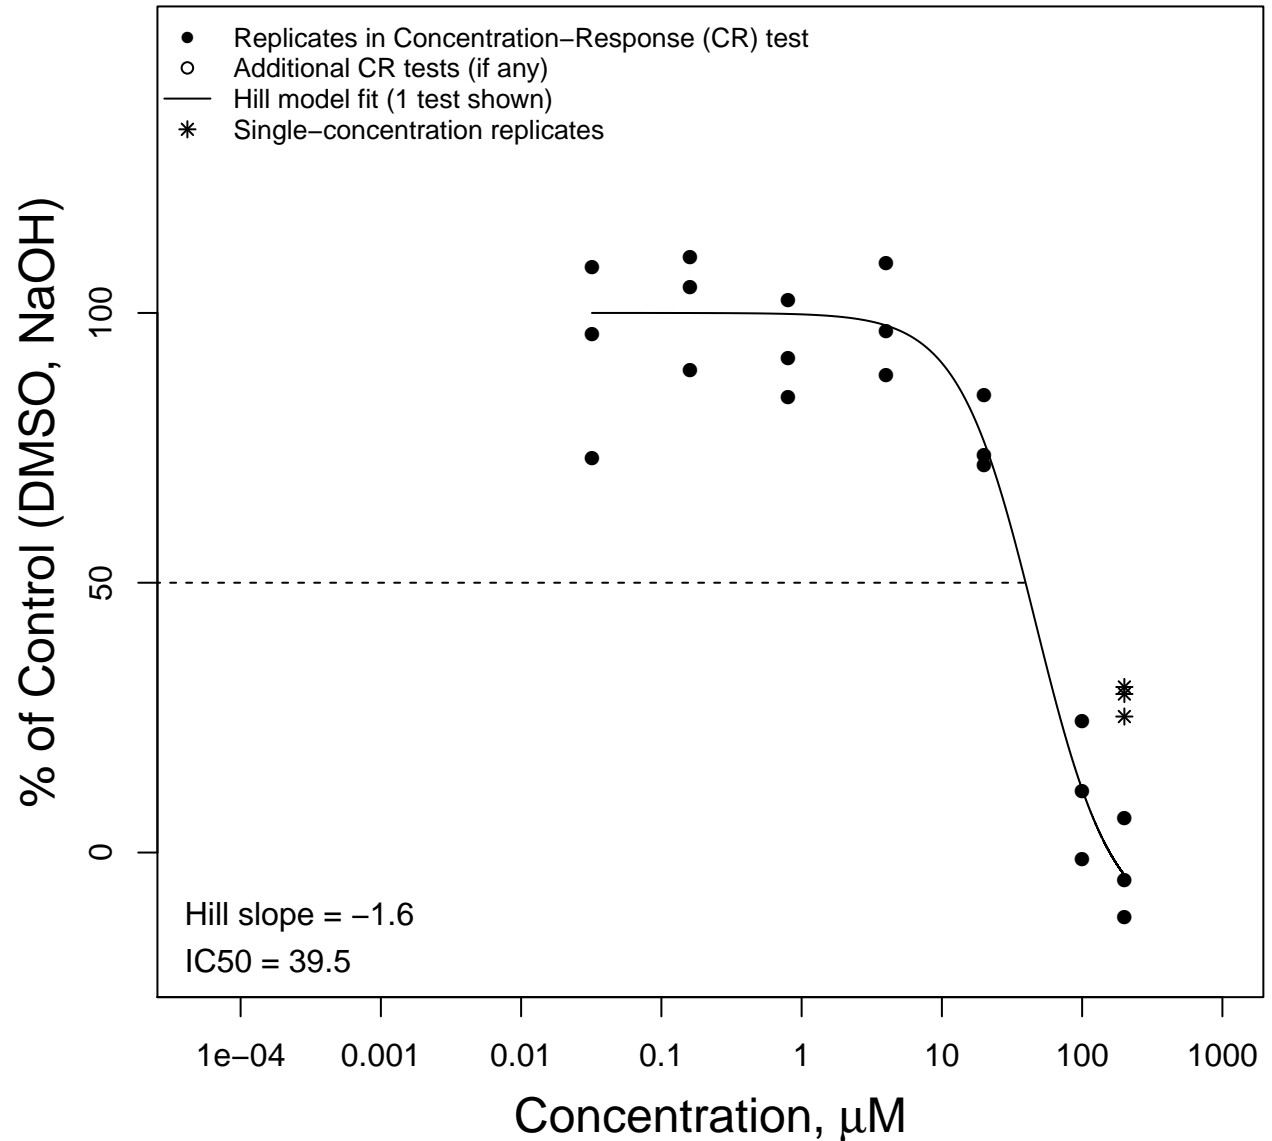

# 4-(1,1,3,3-Tetramethylbutyl)phenol

CASRN: 140-66-9

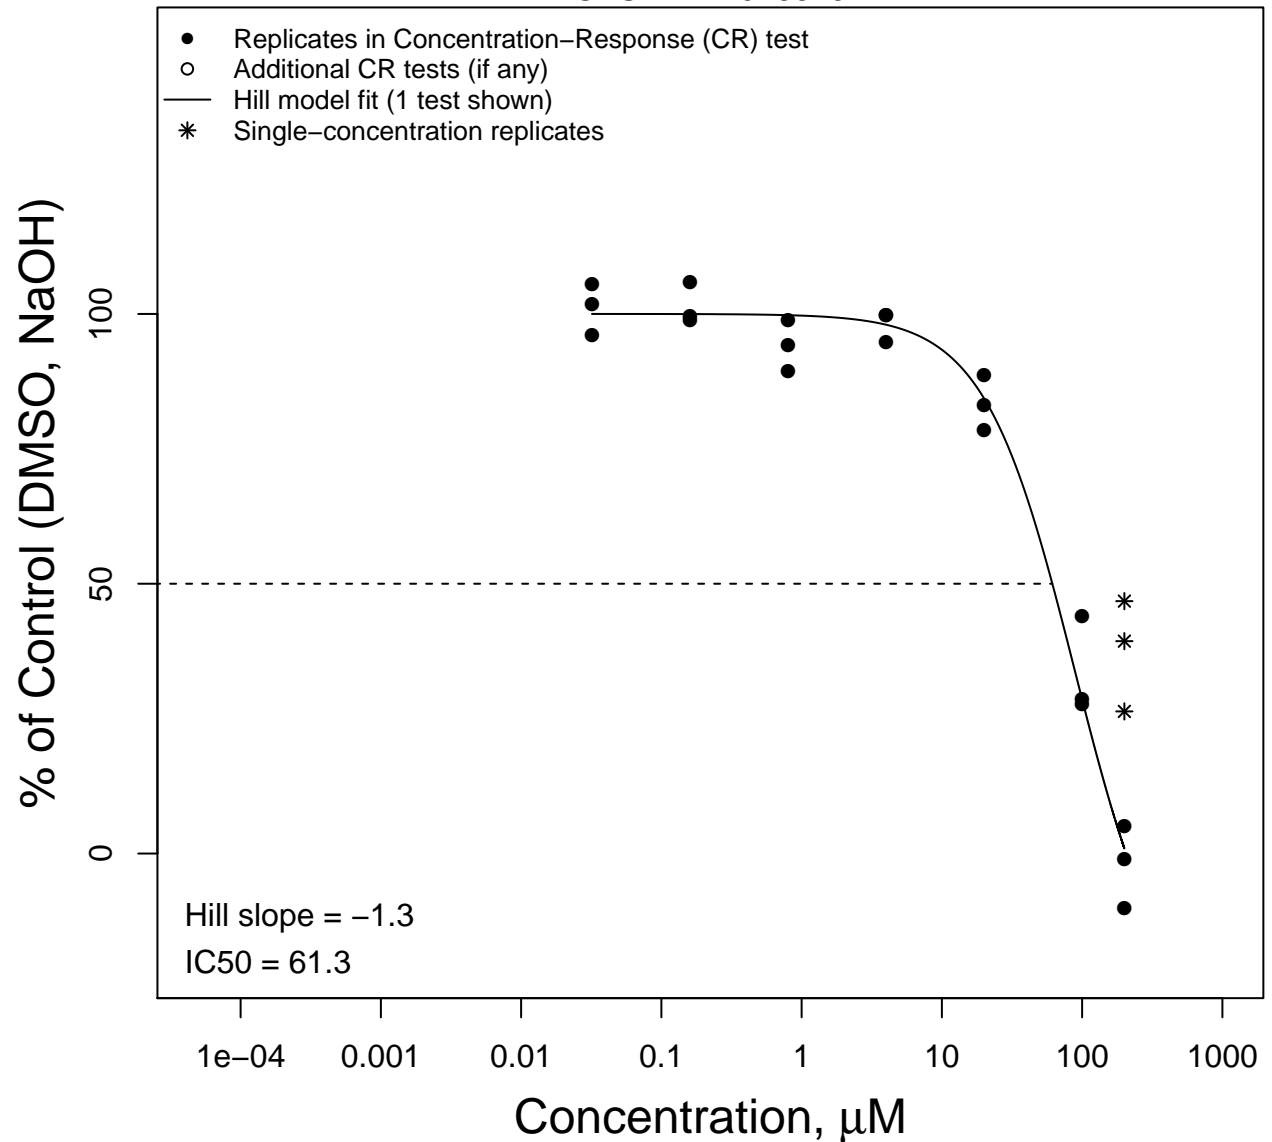

# 4-Hydroxytamoxifen

CASRN: 68392-35-8

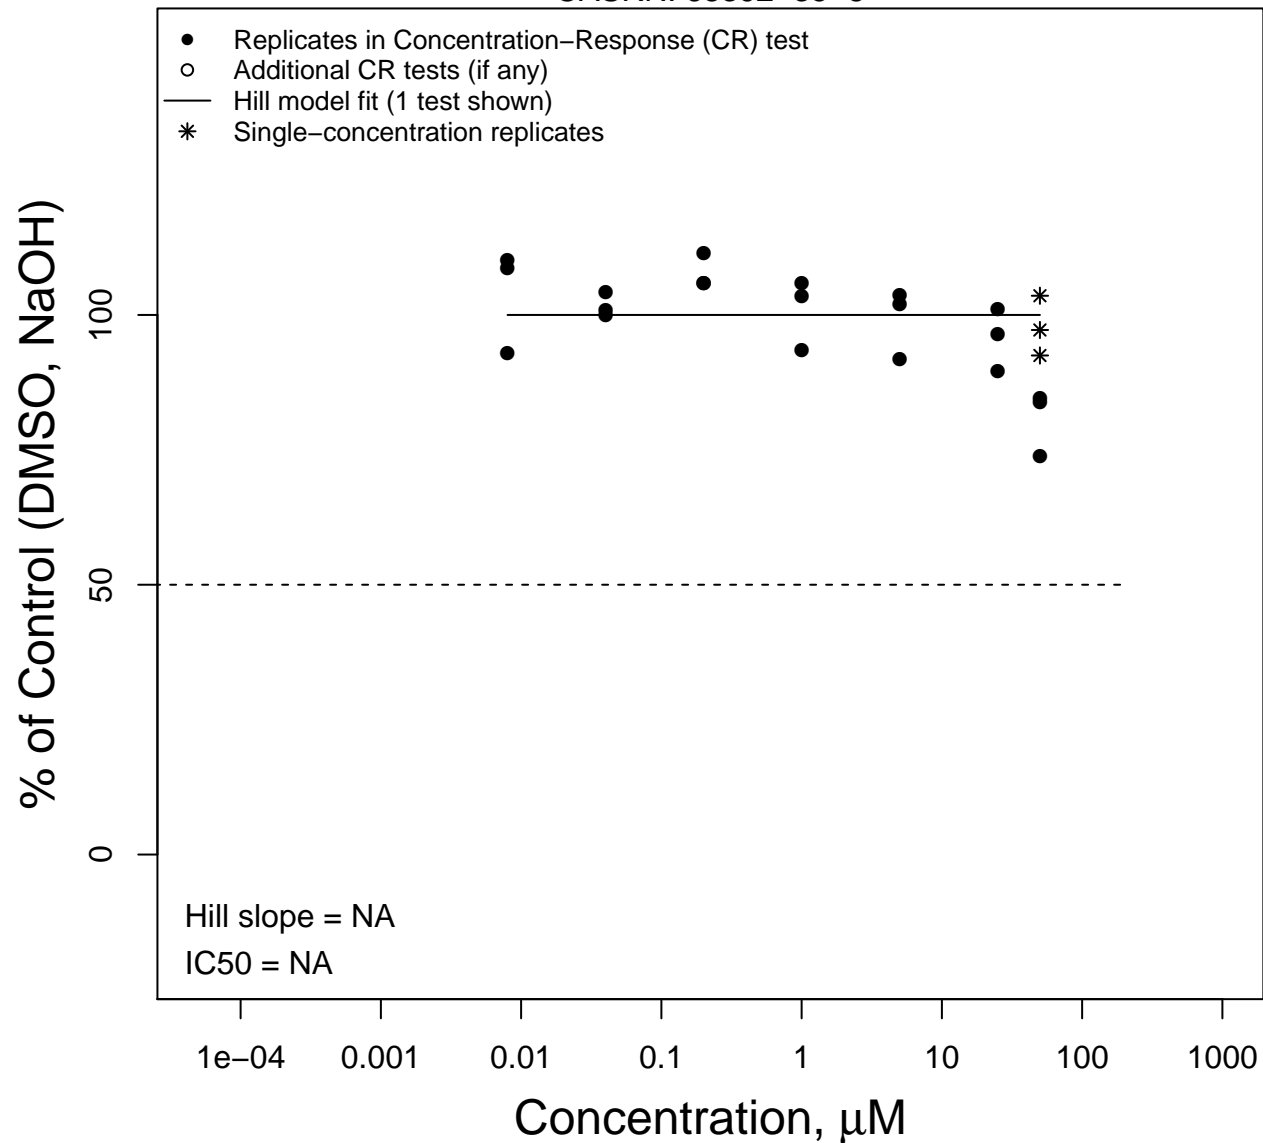

# 4-Heptylphenol

CASRN: 1987-50-4

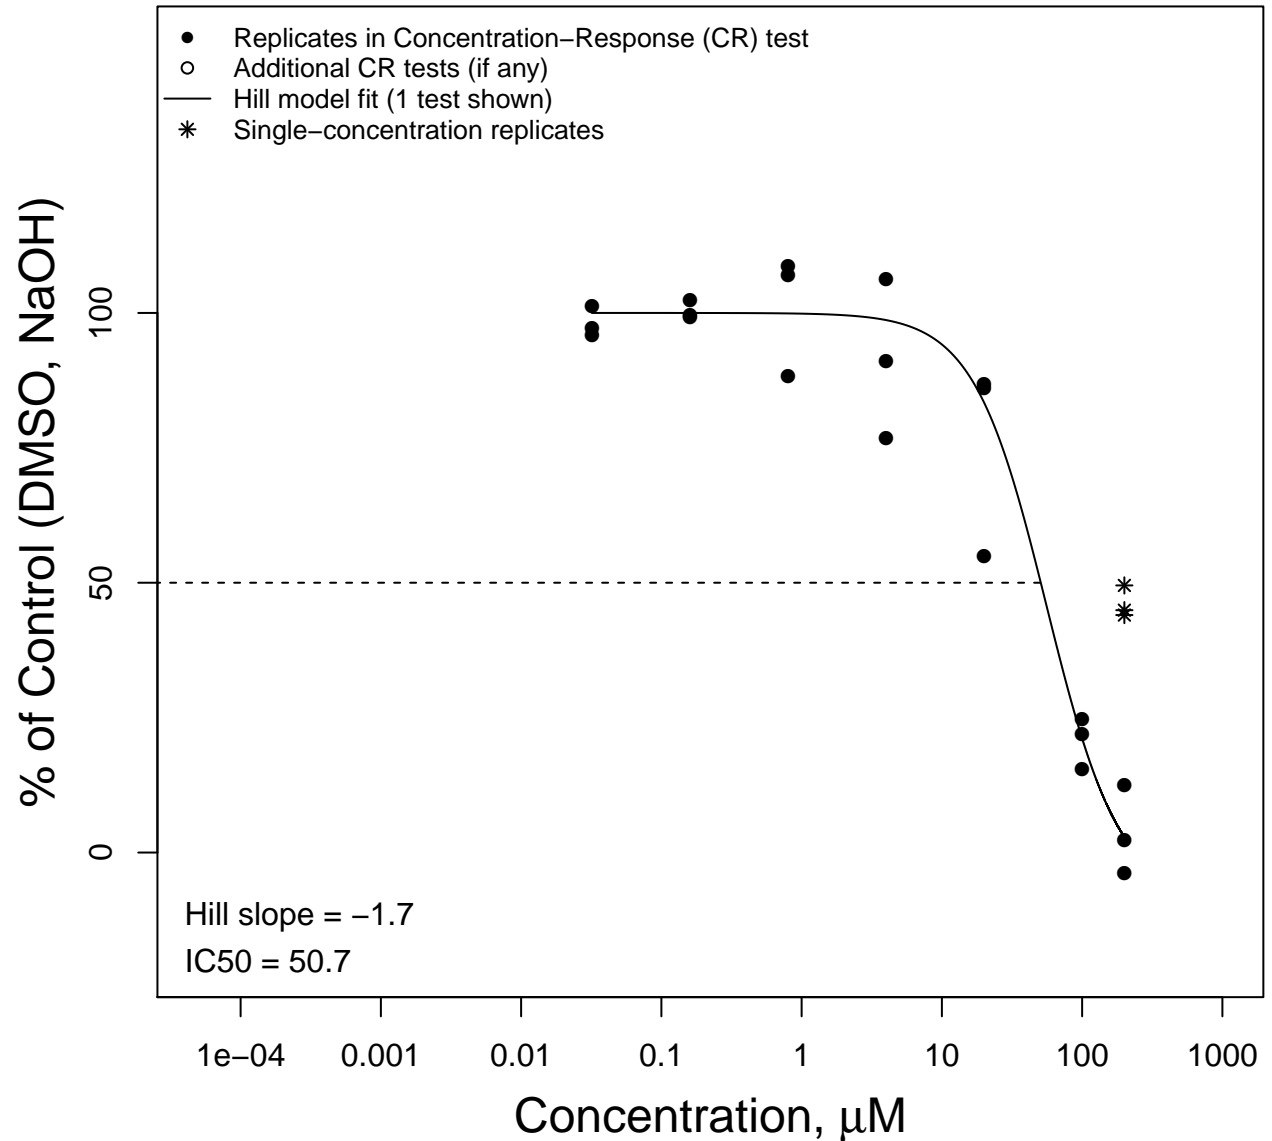

# AVE6324

CASRN: NOCAS\_47377

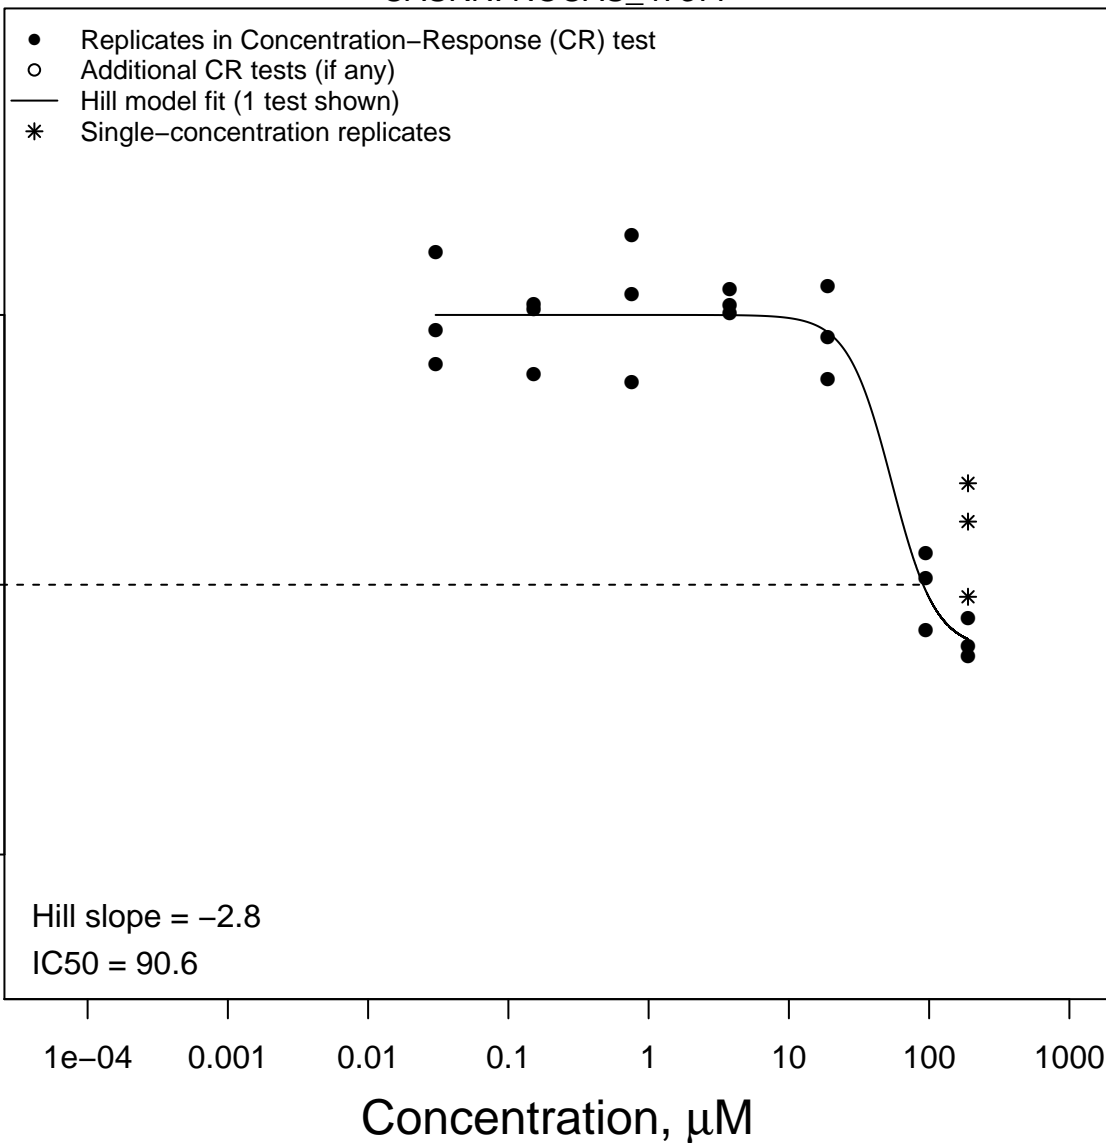

# Allura Red C.I.16035

CASRN: 25956-17-6

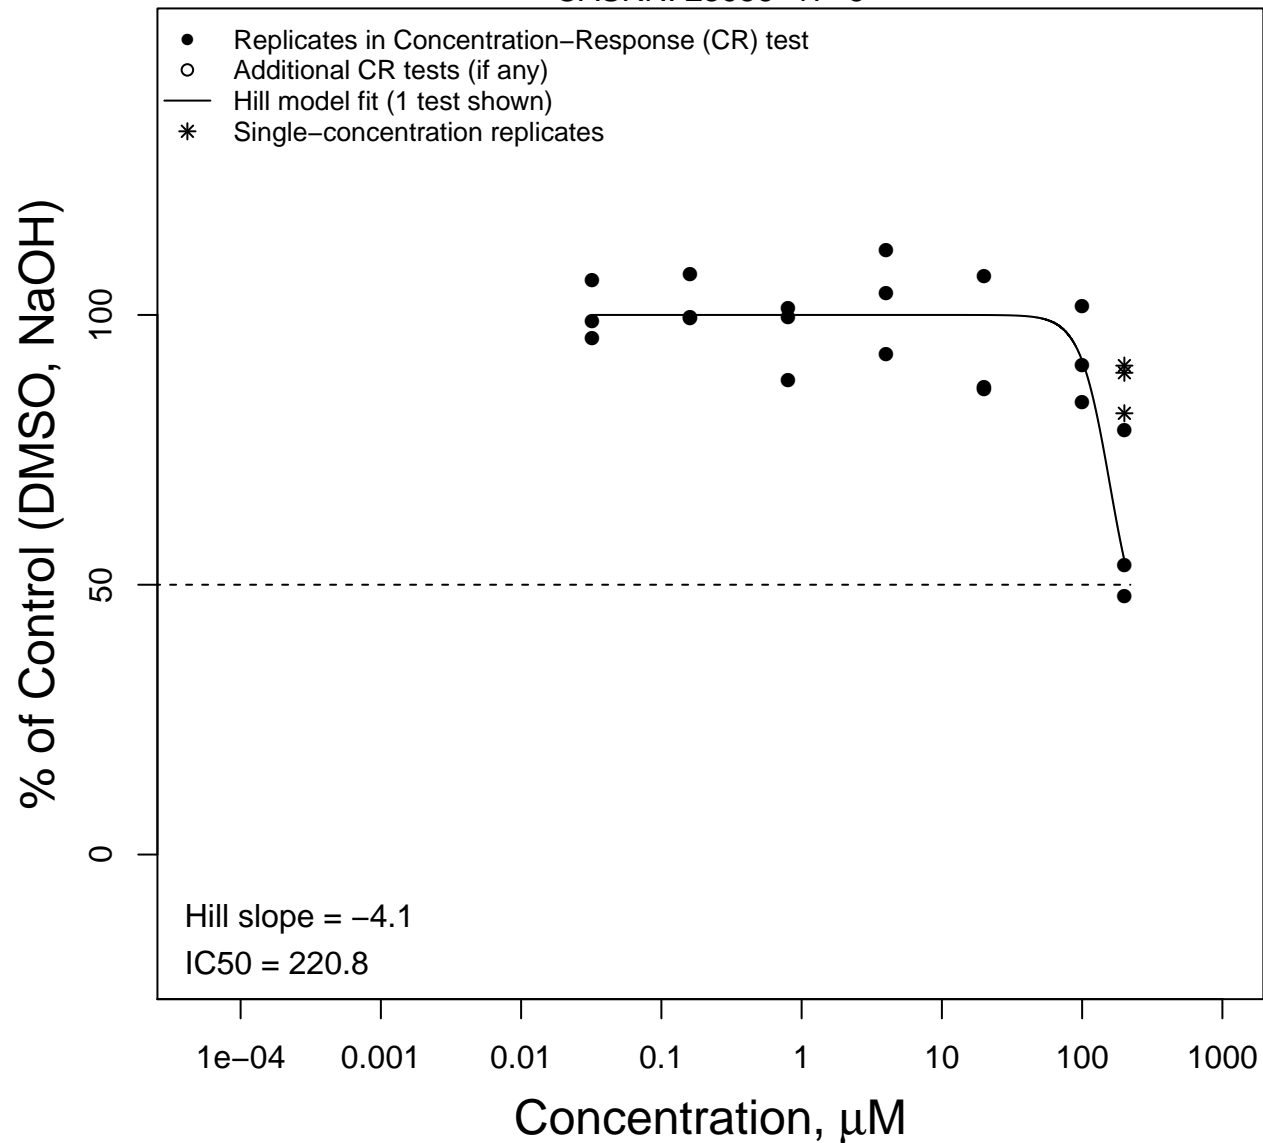



# Clomiphene citrate (1:1)

CASRN: 50-41-9

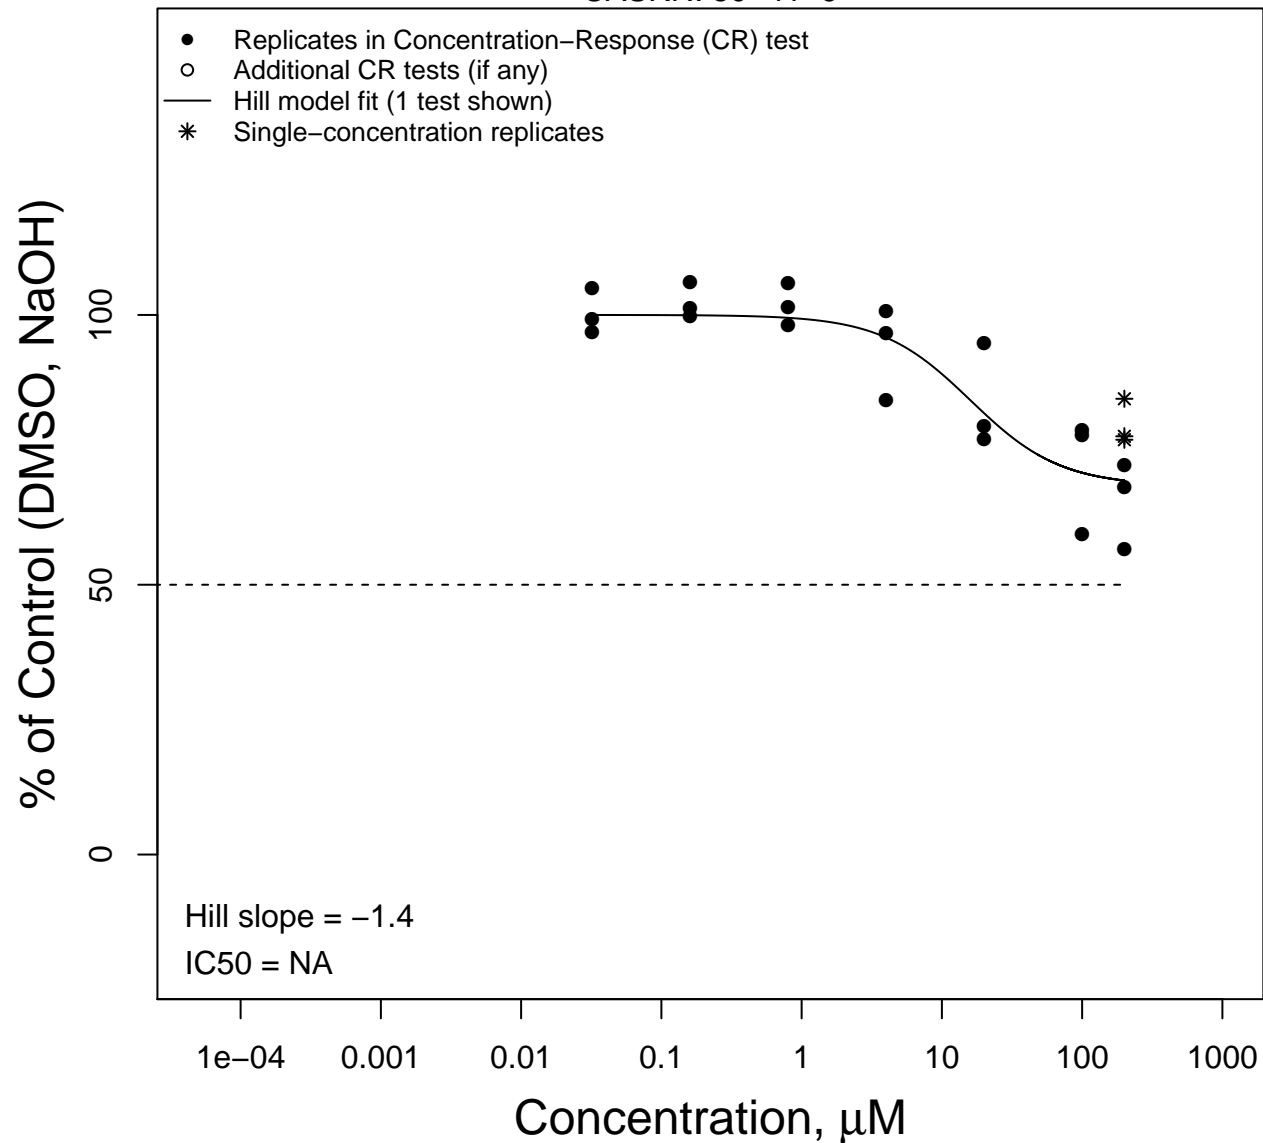

# Docusate sodium

CASRN: 577-11-7

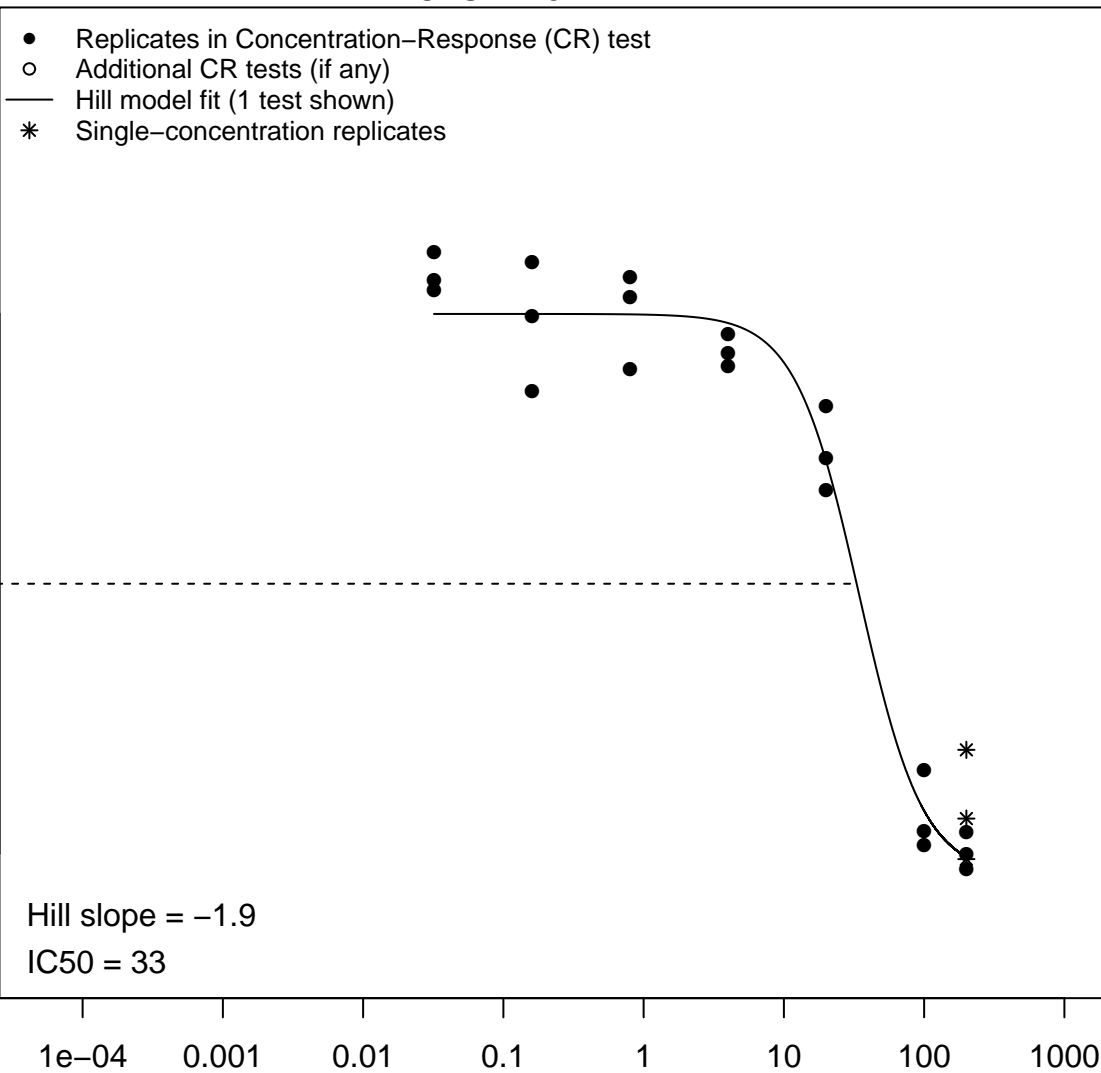

Concentration, µM

% of Control (DMSO, NaOH)

# Dichlorodiphenyltrichloroethane

CASRN: 50-29-3

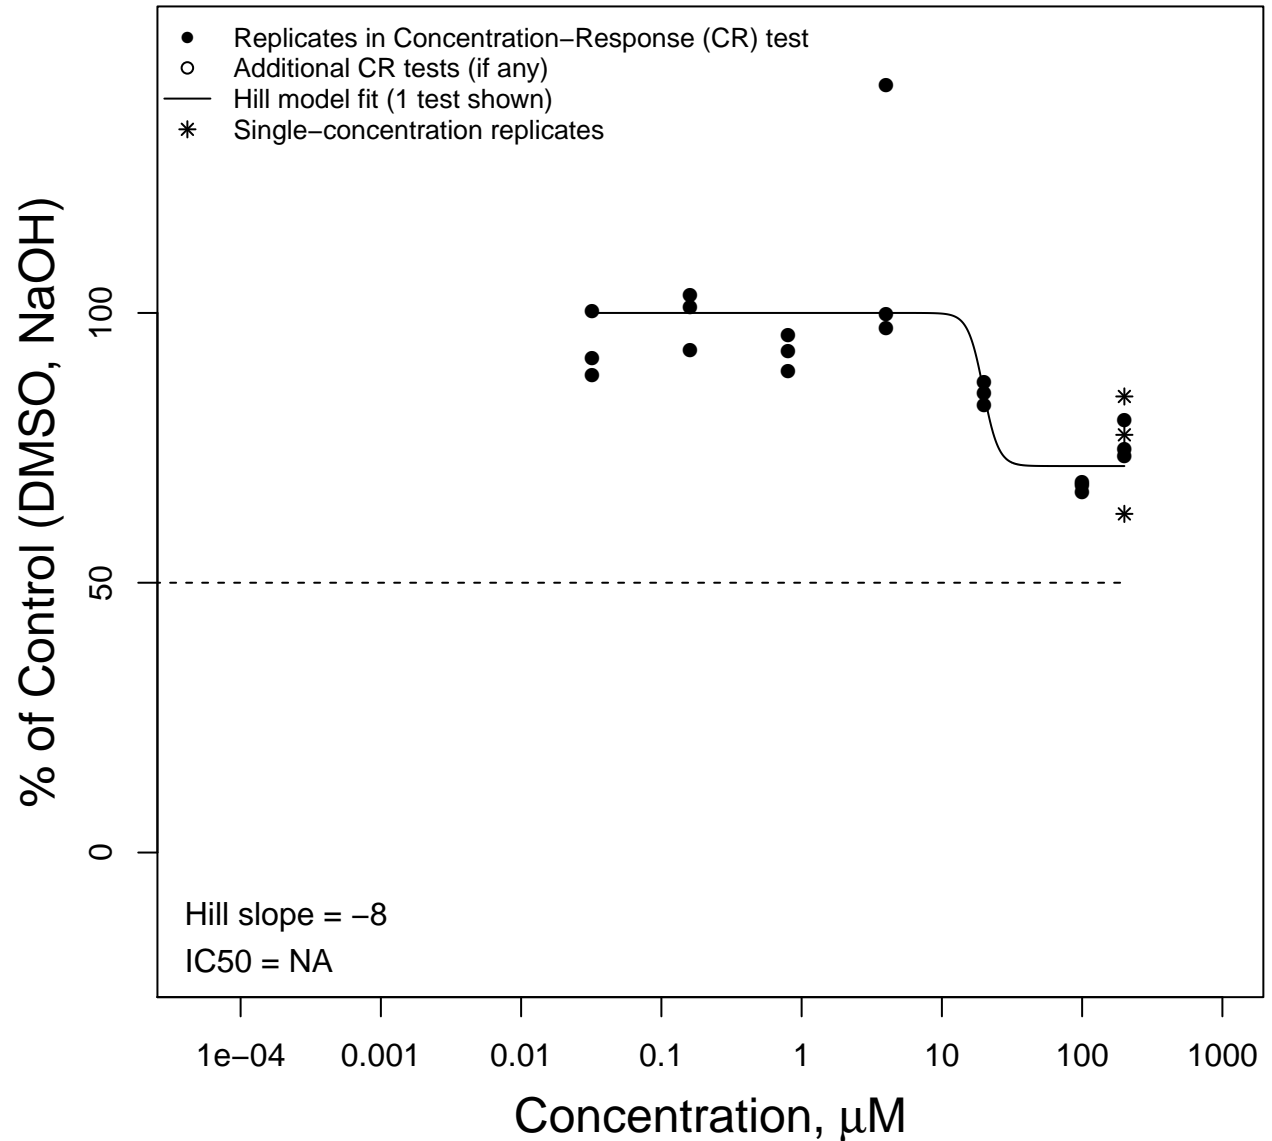

# Dodecylbenzene sulfonate triethanolamine(1:1)

CASRN: 27323-41-7

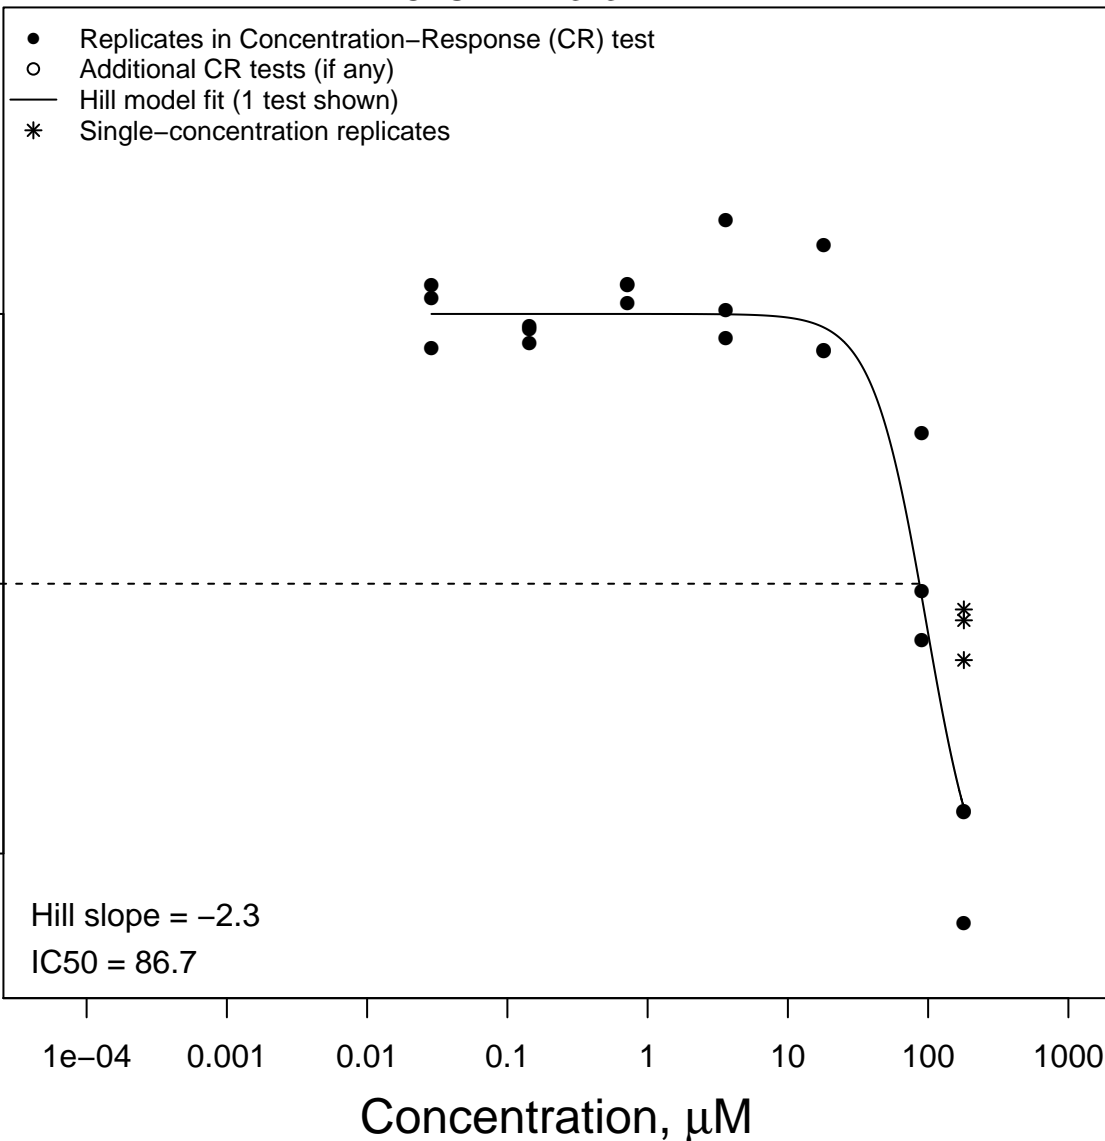

# 3,5-Dichlorosalicyl-3,4-dichloroanilide

CASRN: 1154-59-2

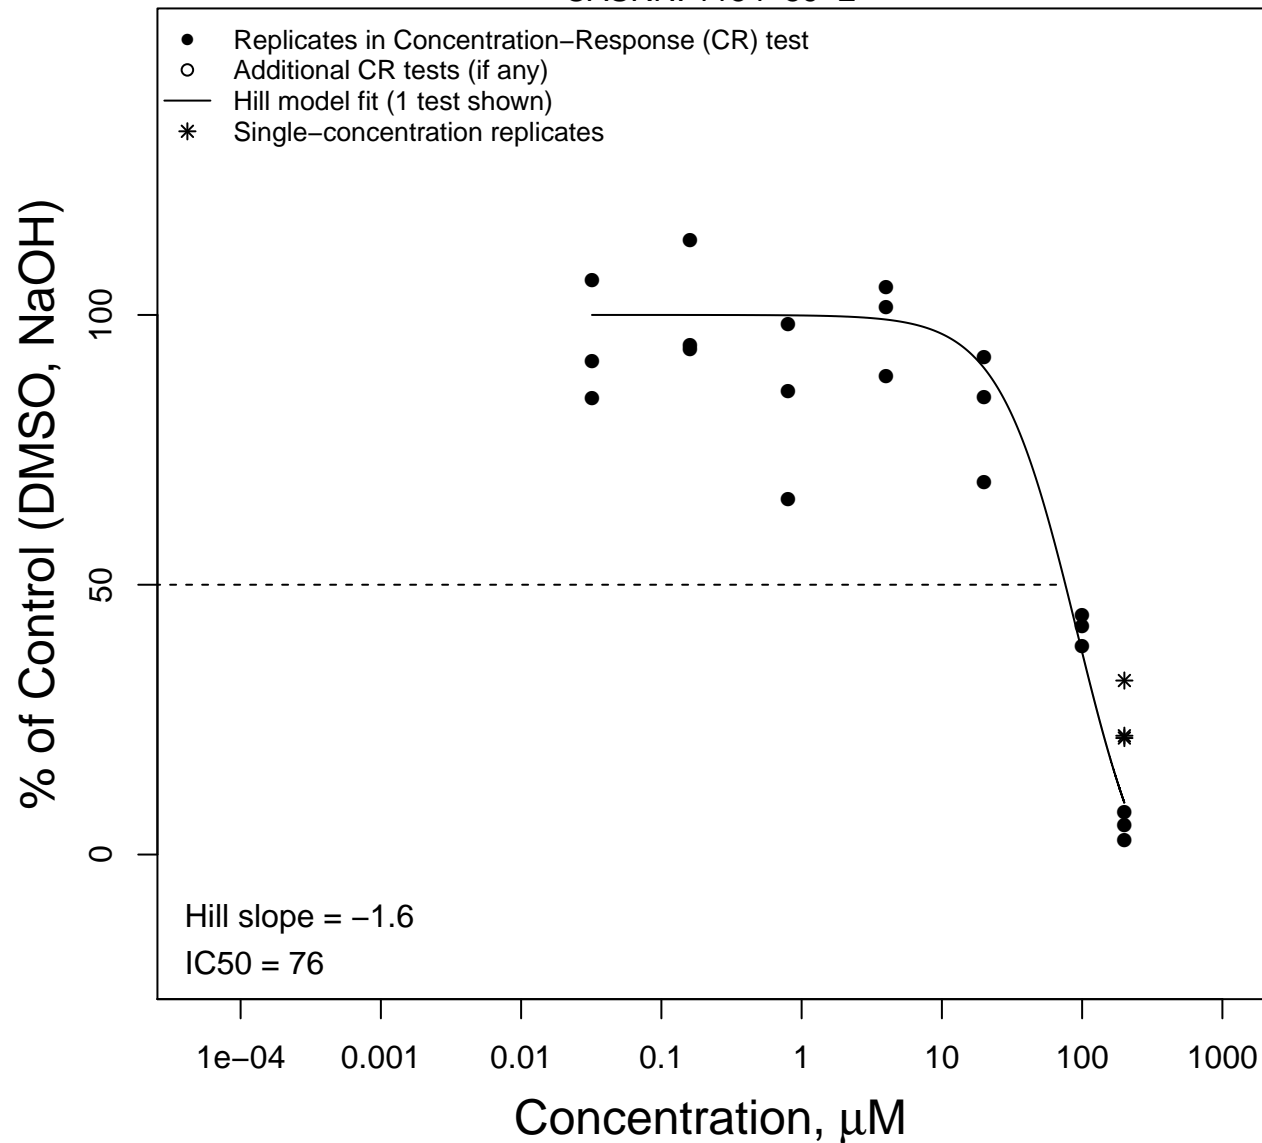

# Dodecylbenzenesulfonic acid

CASRN: 27176-87-0

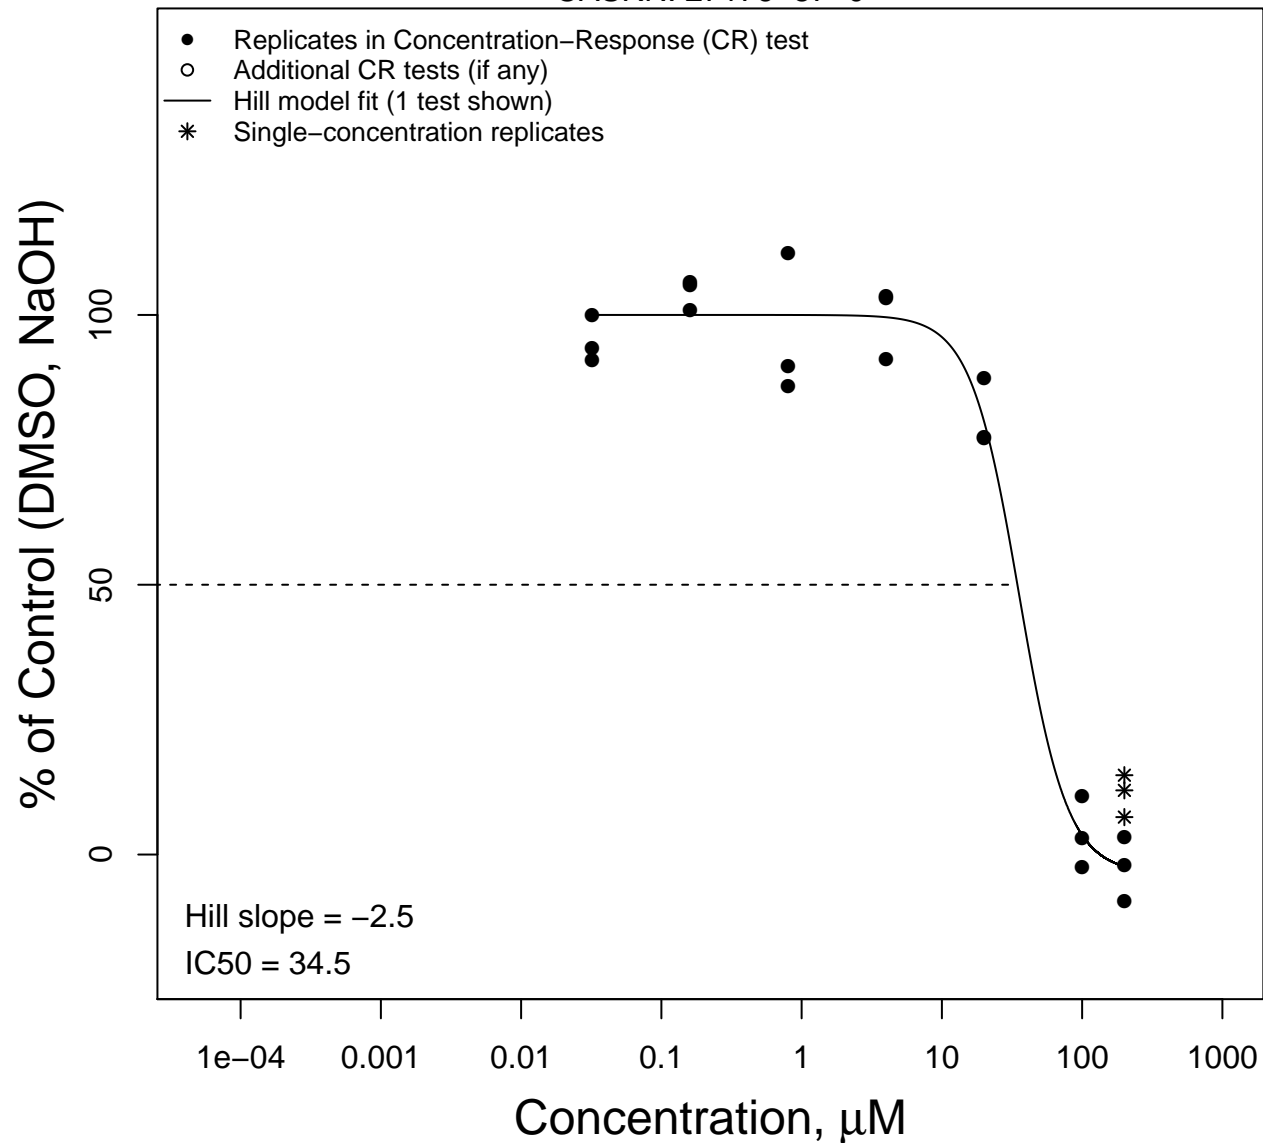

# Didecyldimethylammonium chloride

CASRN: 7173-51-5

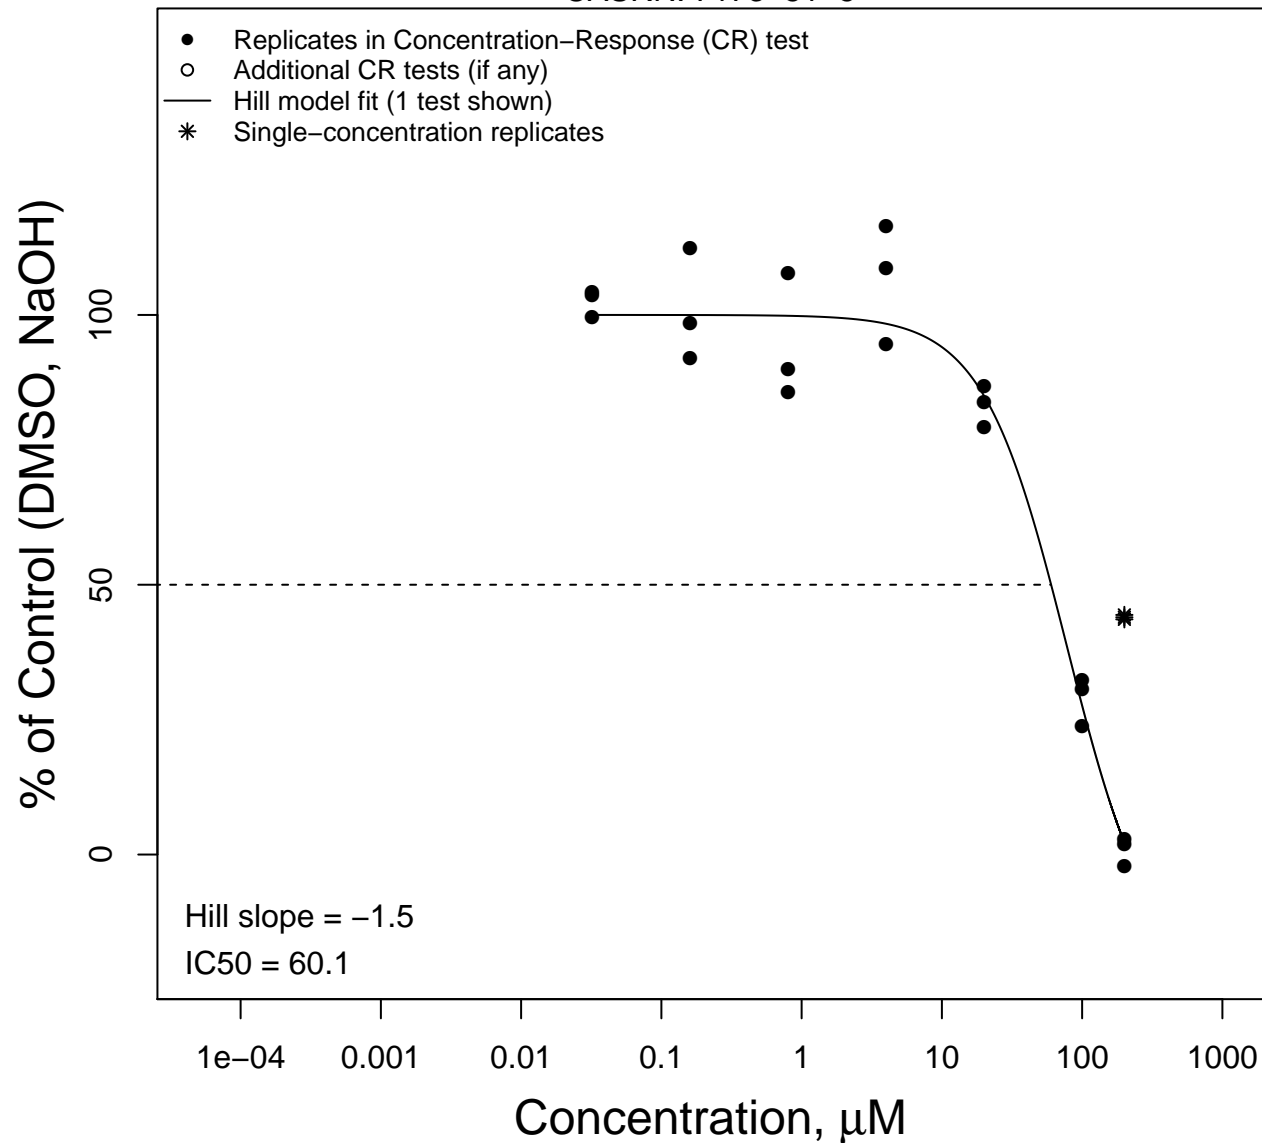

# Dodecyltrimethylammonium chloride

CASRN: 112-00-5

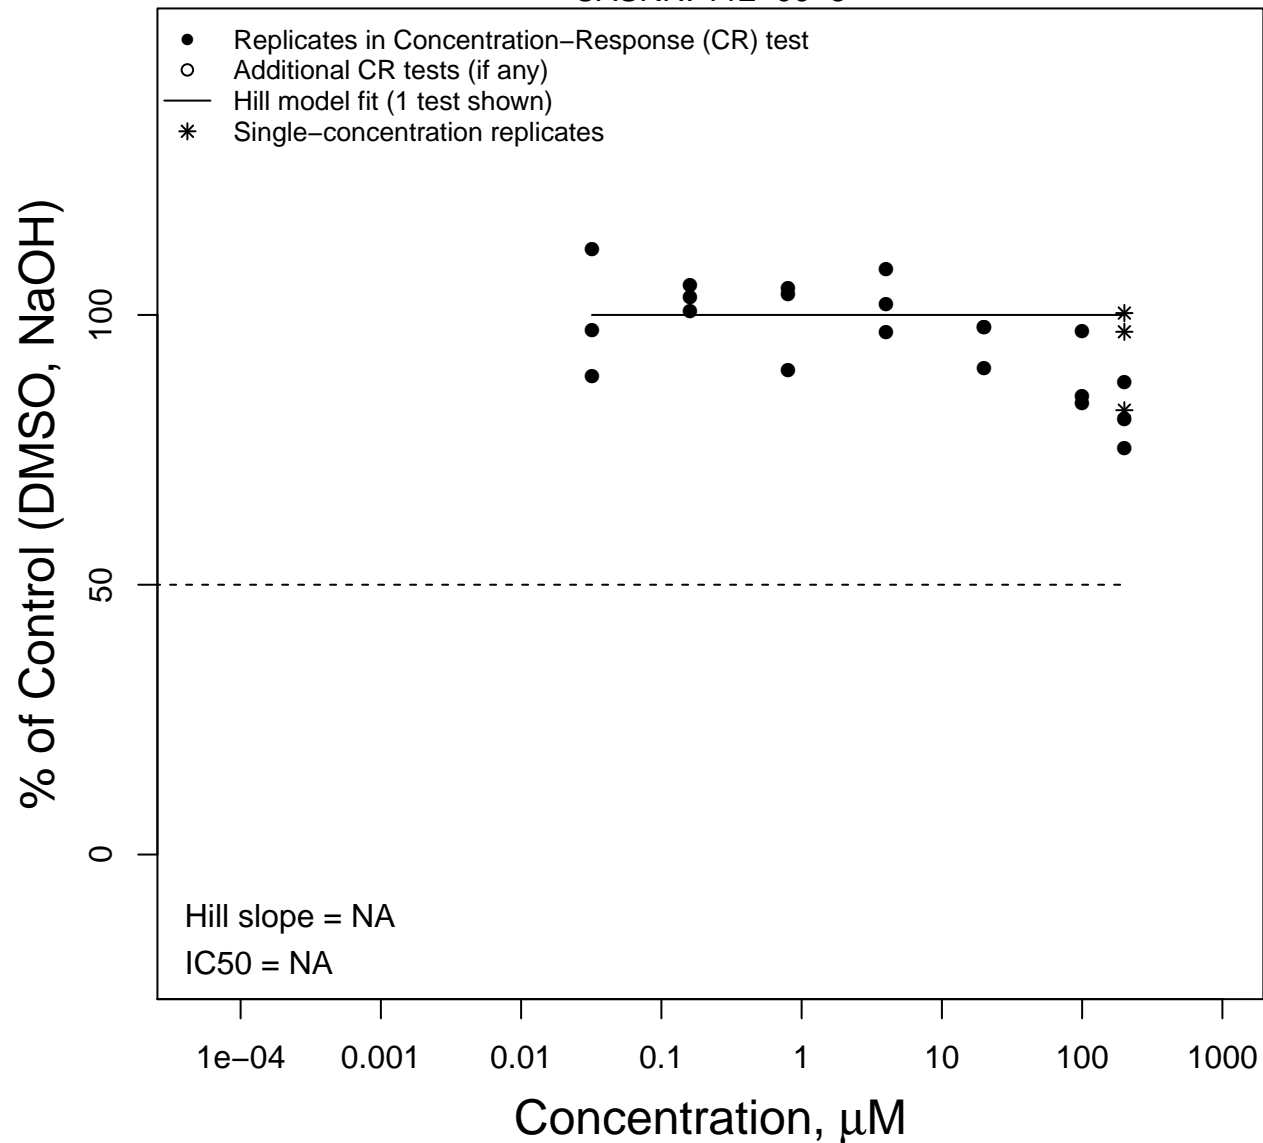



# FR167356

CASRN: 174185-16-1

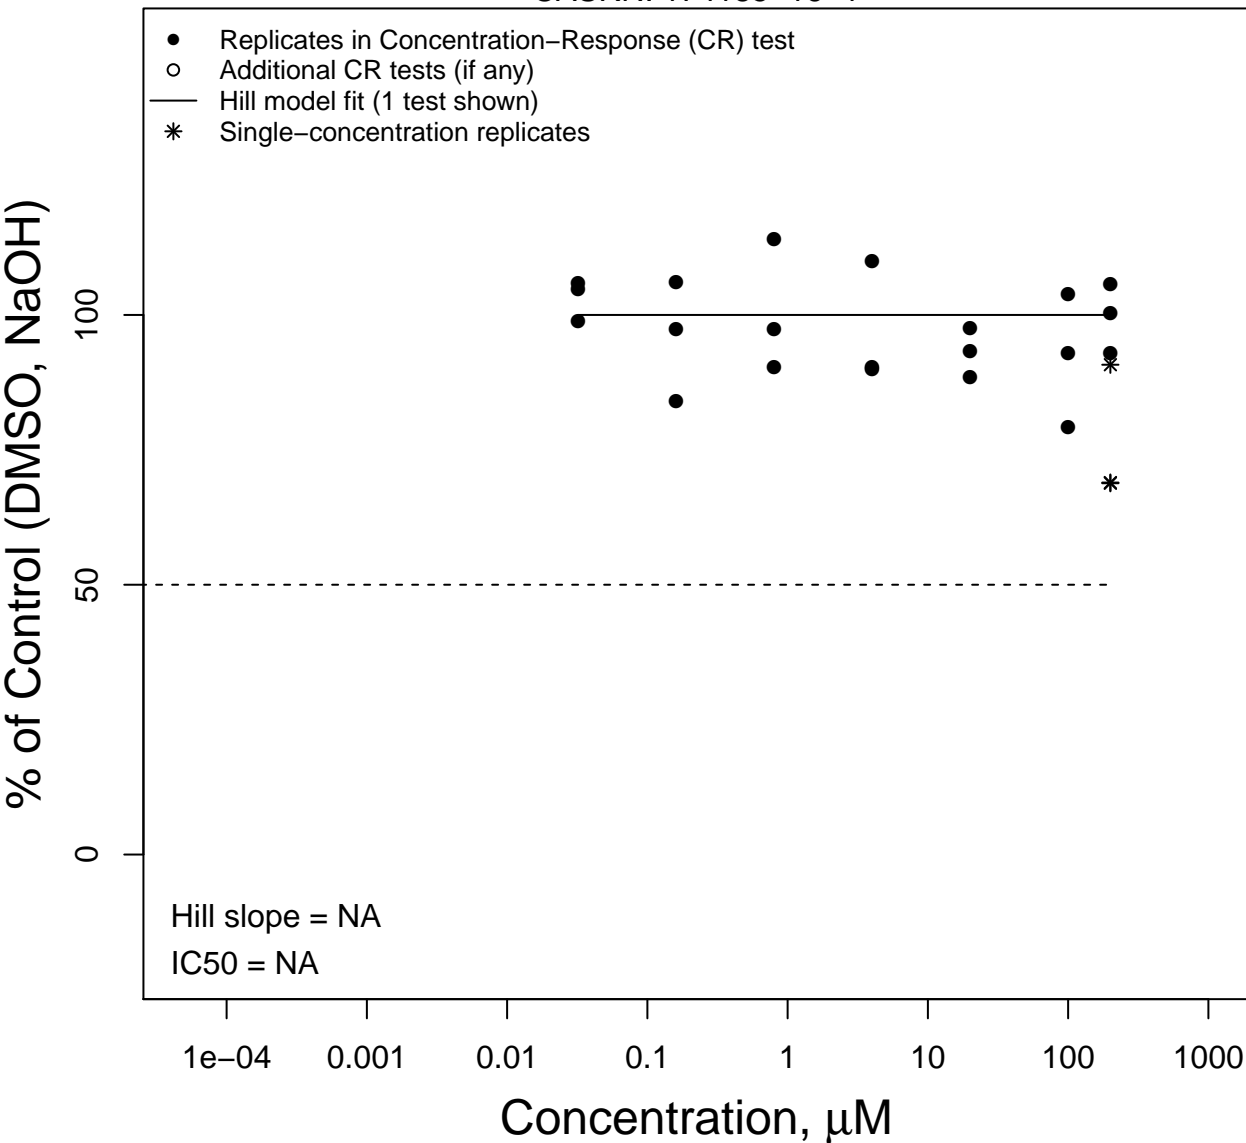

# Gentian Violet

CASRN: 548-62-9

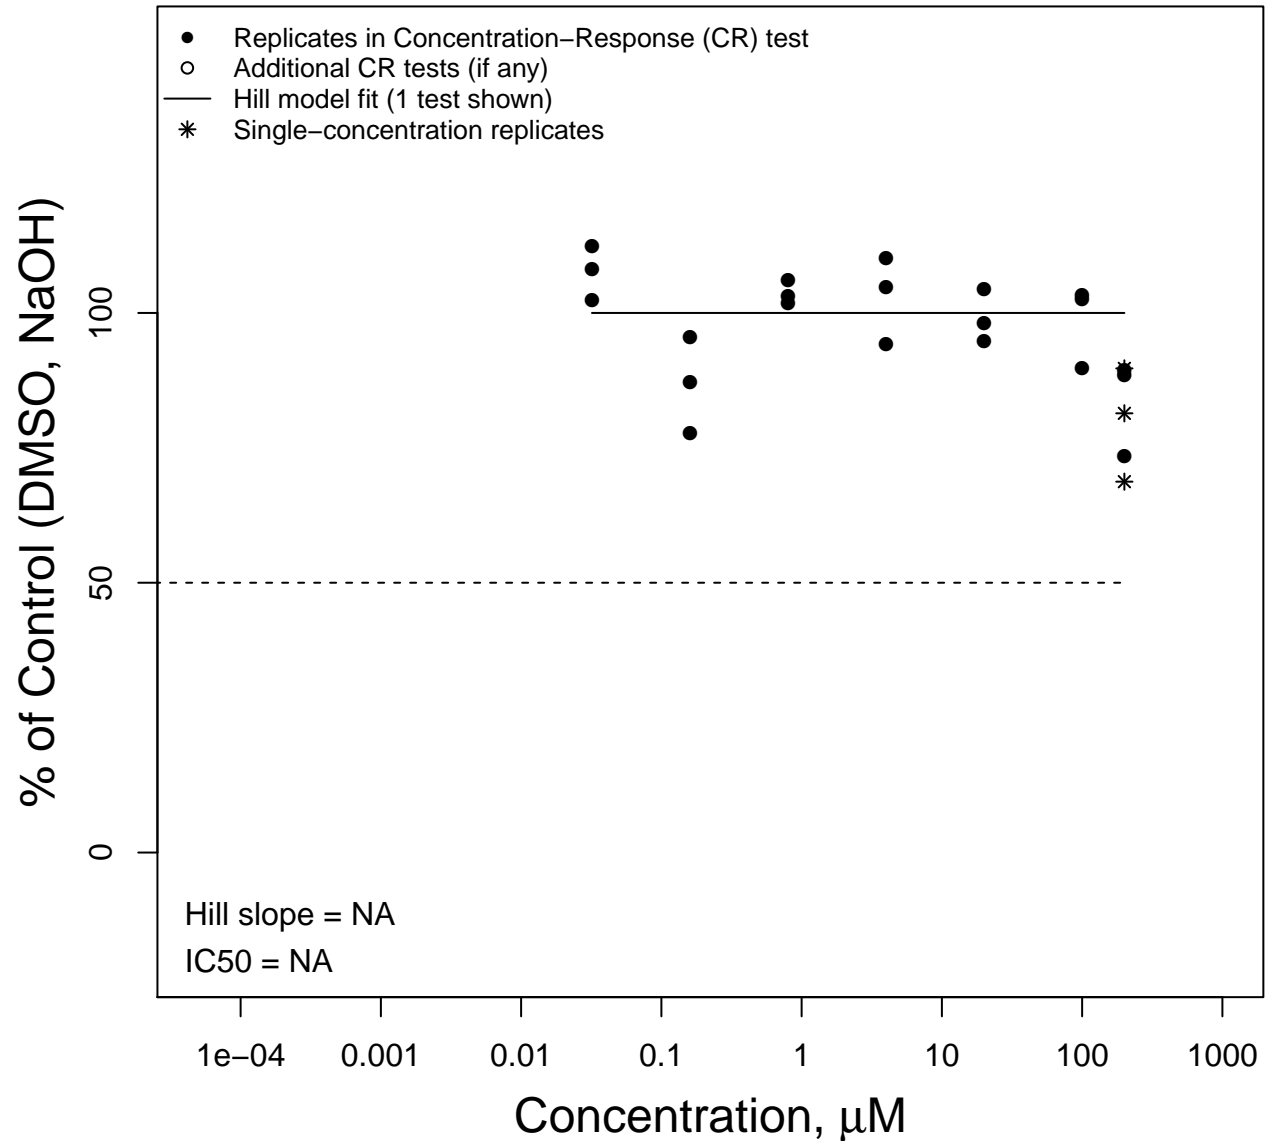

# Isooctyl acrylate

CASRN: 29590-42-9

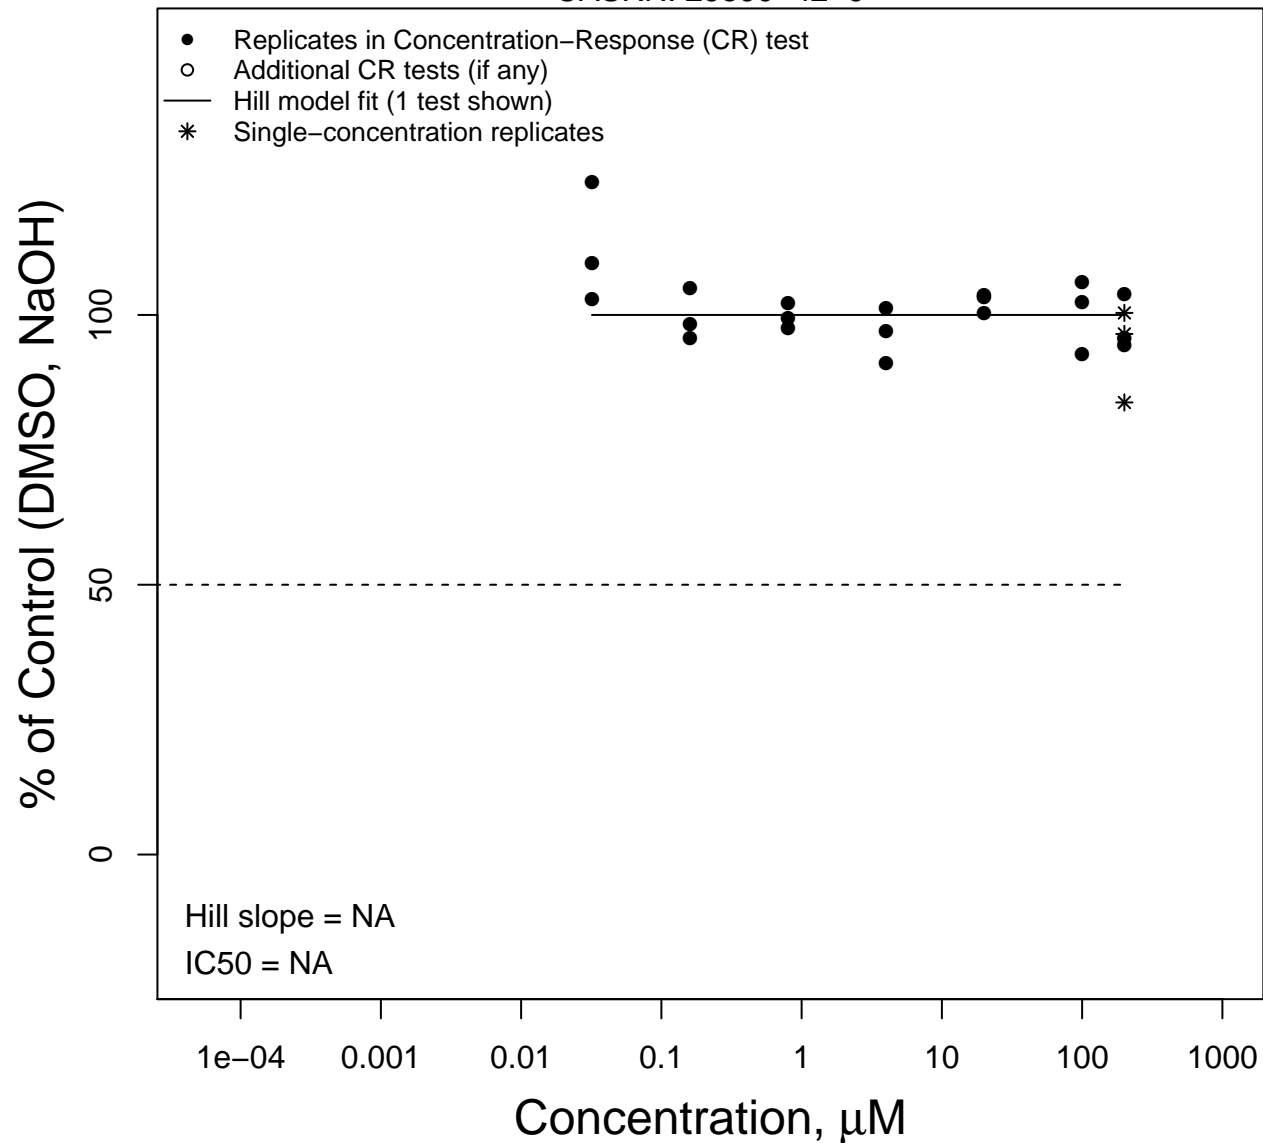

# FR150011

CASRN: 149413-74-1

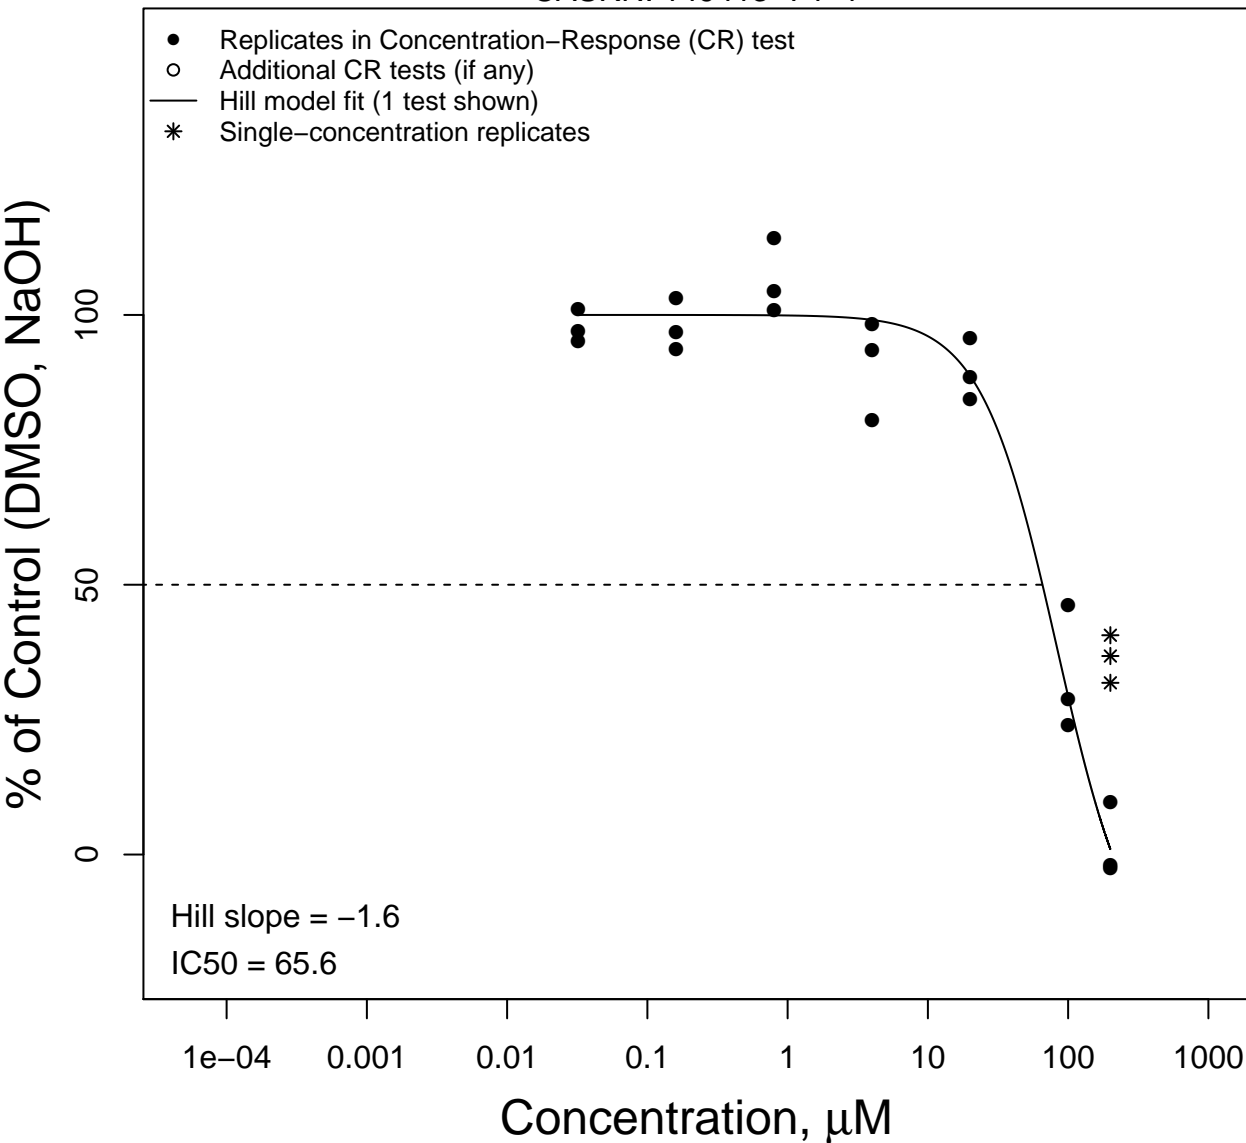

# Kepone

CASRN: 143-50-0

- Replicates in Concentration-Response (CR) test
- Additional CR tests (if any)
- Hill model fit (1 test shown)
- \* Single-concentration replicates

% of Control (DMSO, NaOH)

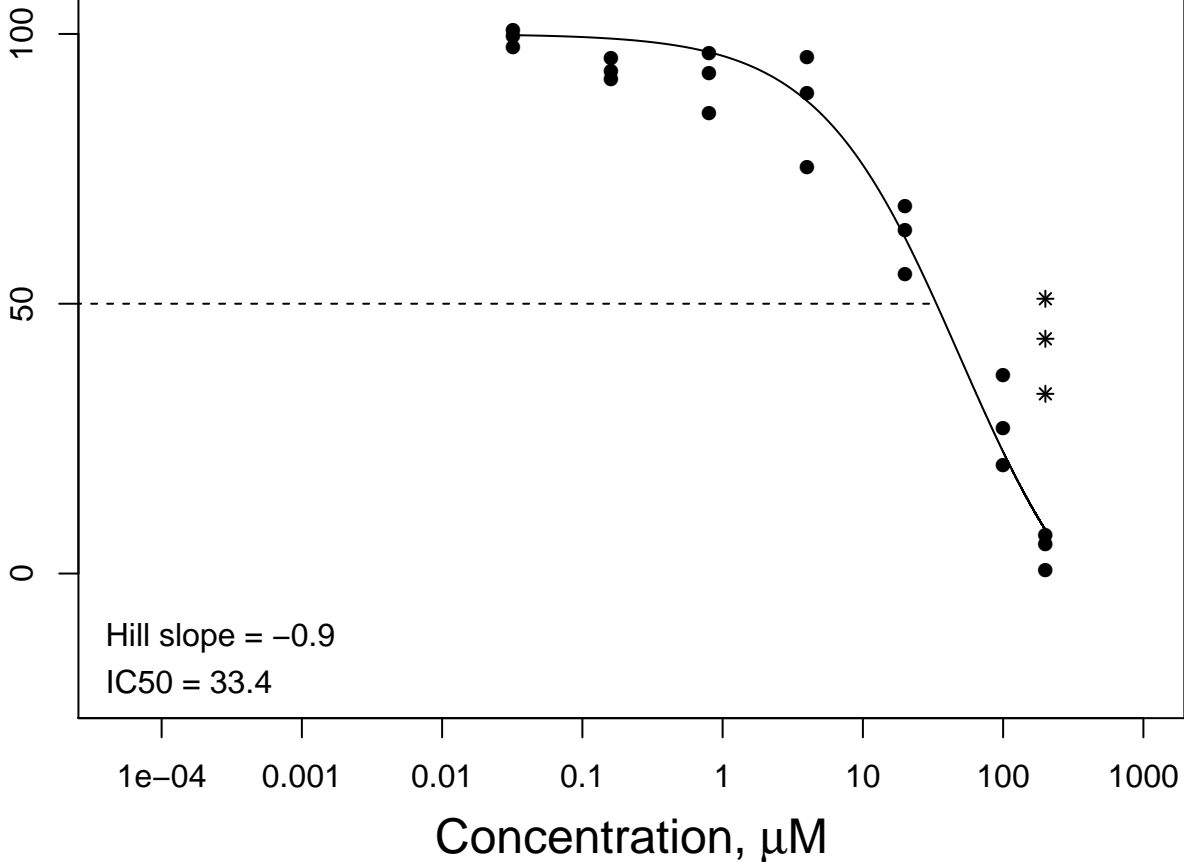

# Fenaminosulf

CASRN: 140-56-7

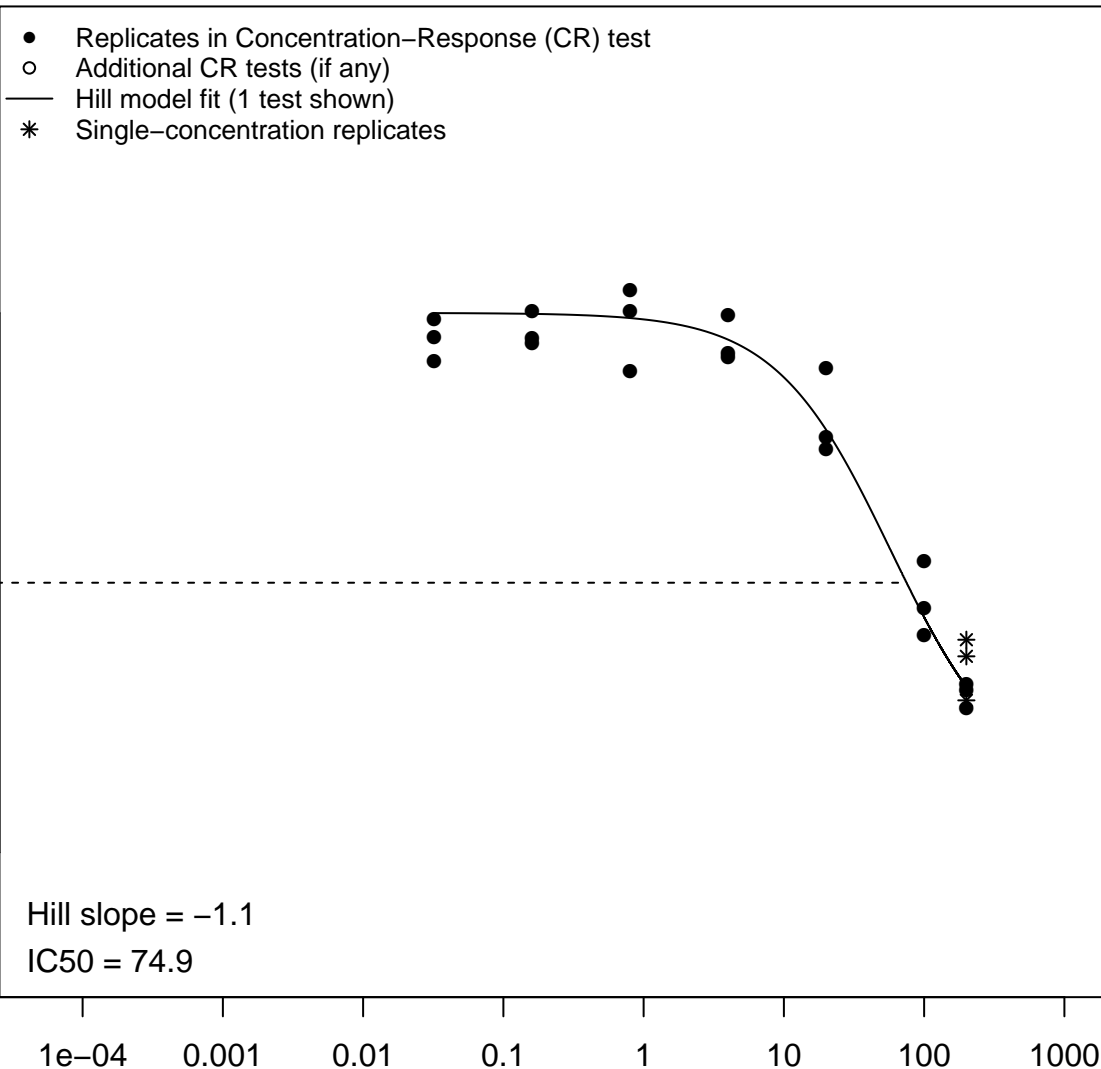

Concentration,  $\mu\text{M}$

# FD&C Blue No. 1

CASRN: 3844-45-9

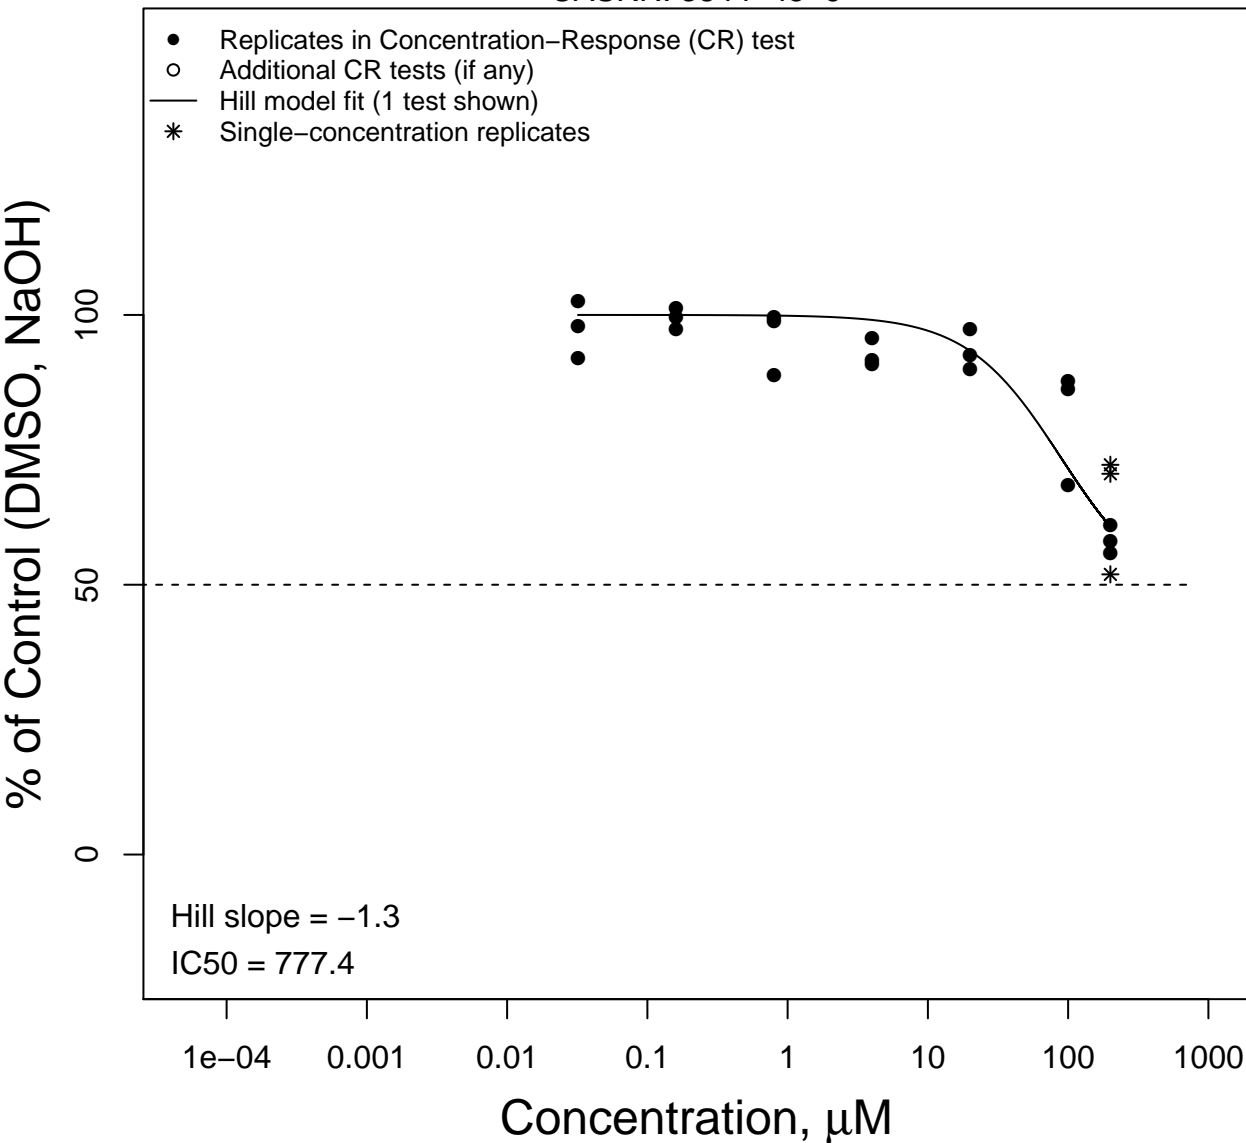

# Nitrofurazone

CASRN: 59-87-0

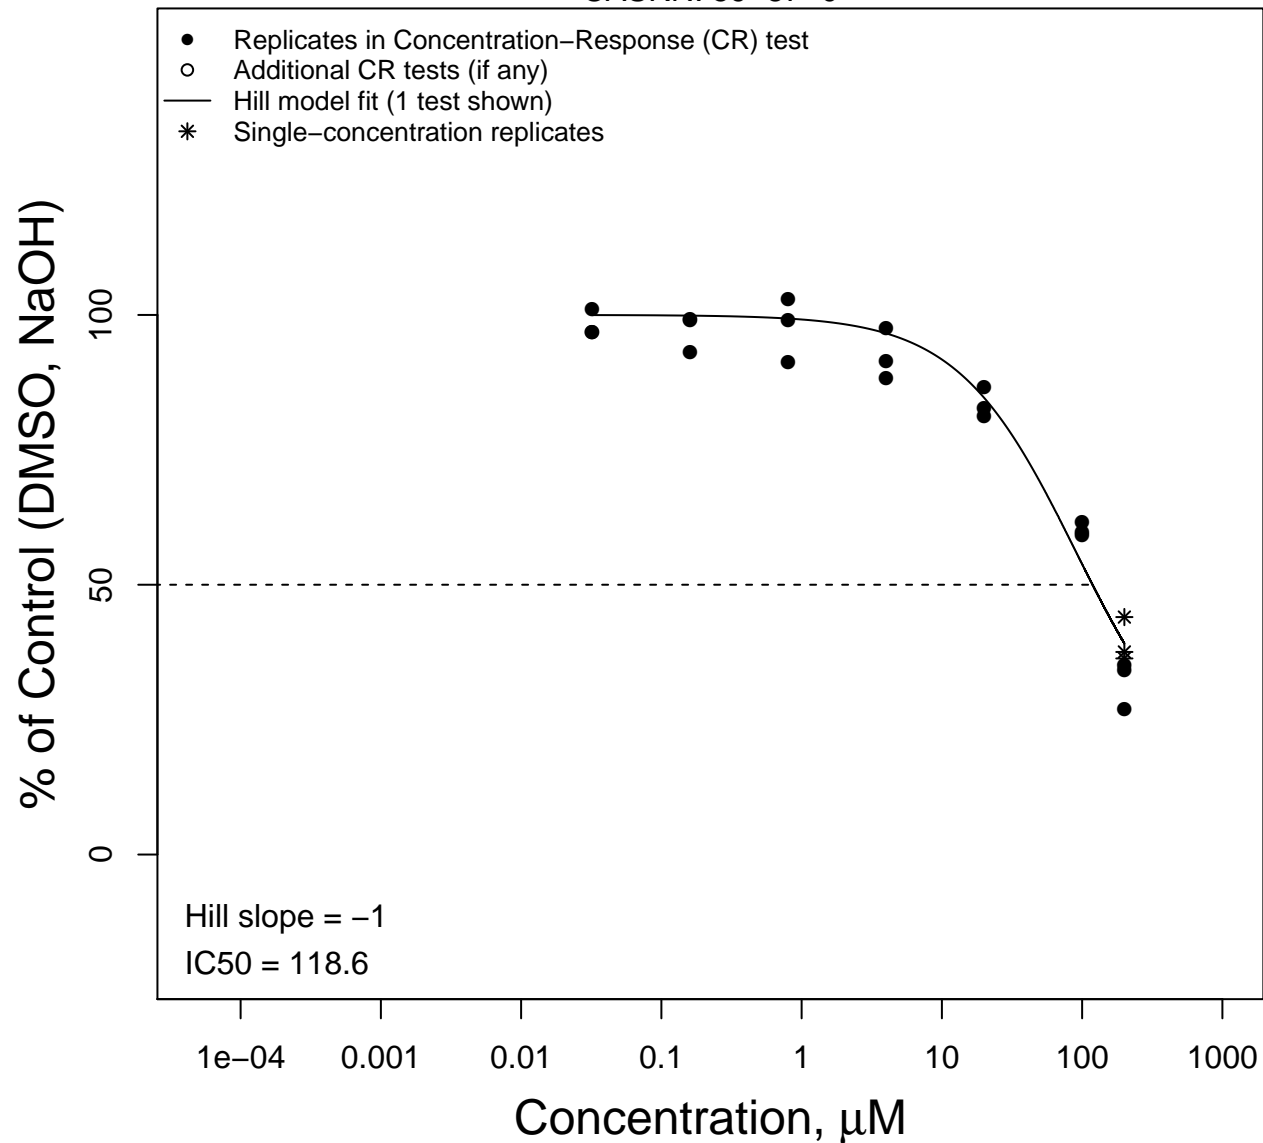



# Mepaniprym

CASRN: 110235-47-7

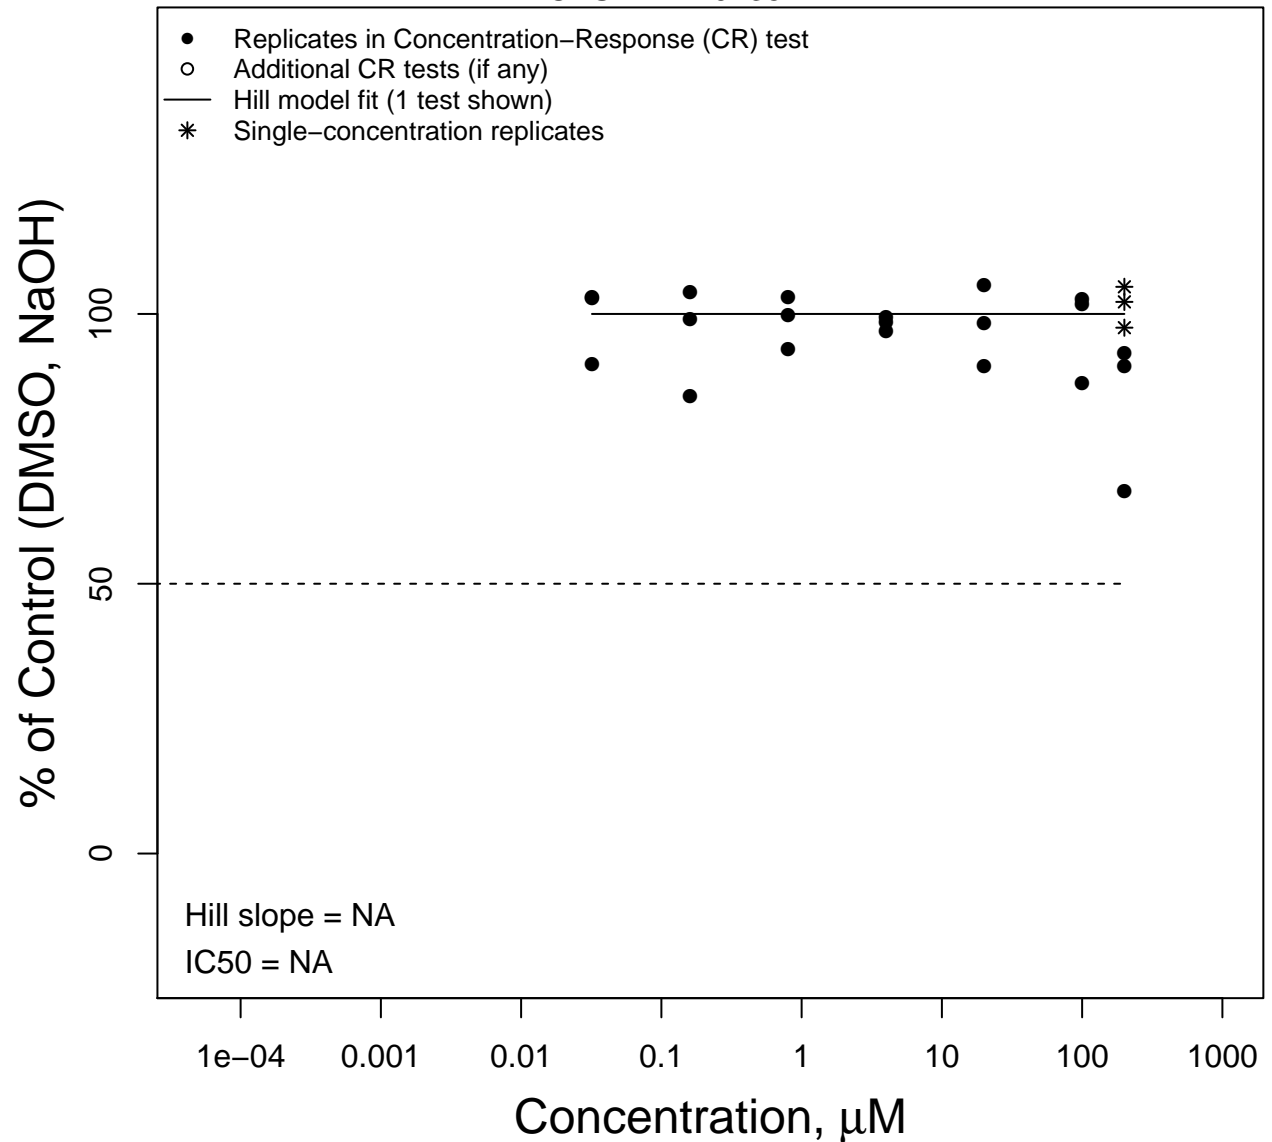

# Perfluoroundecanoic acid

CASRN: 2058-94-8

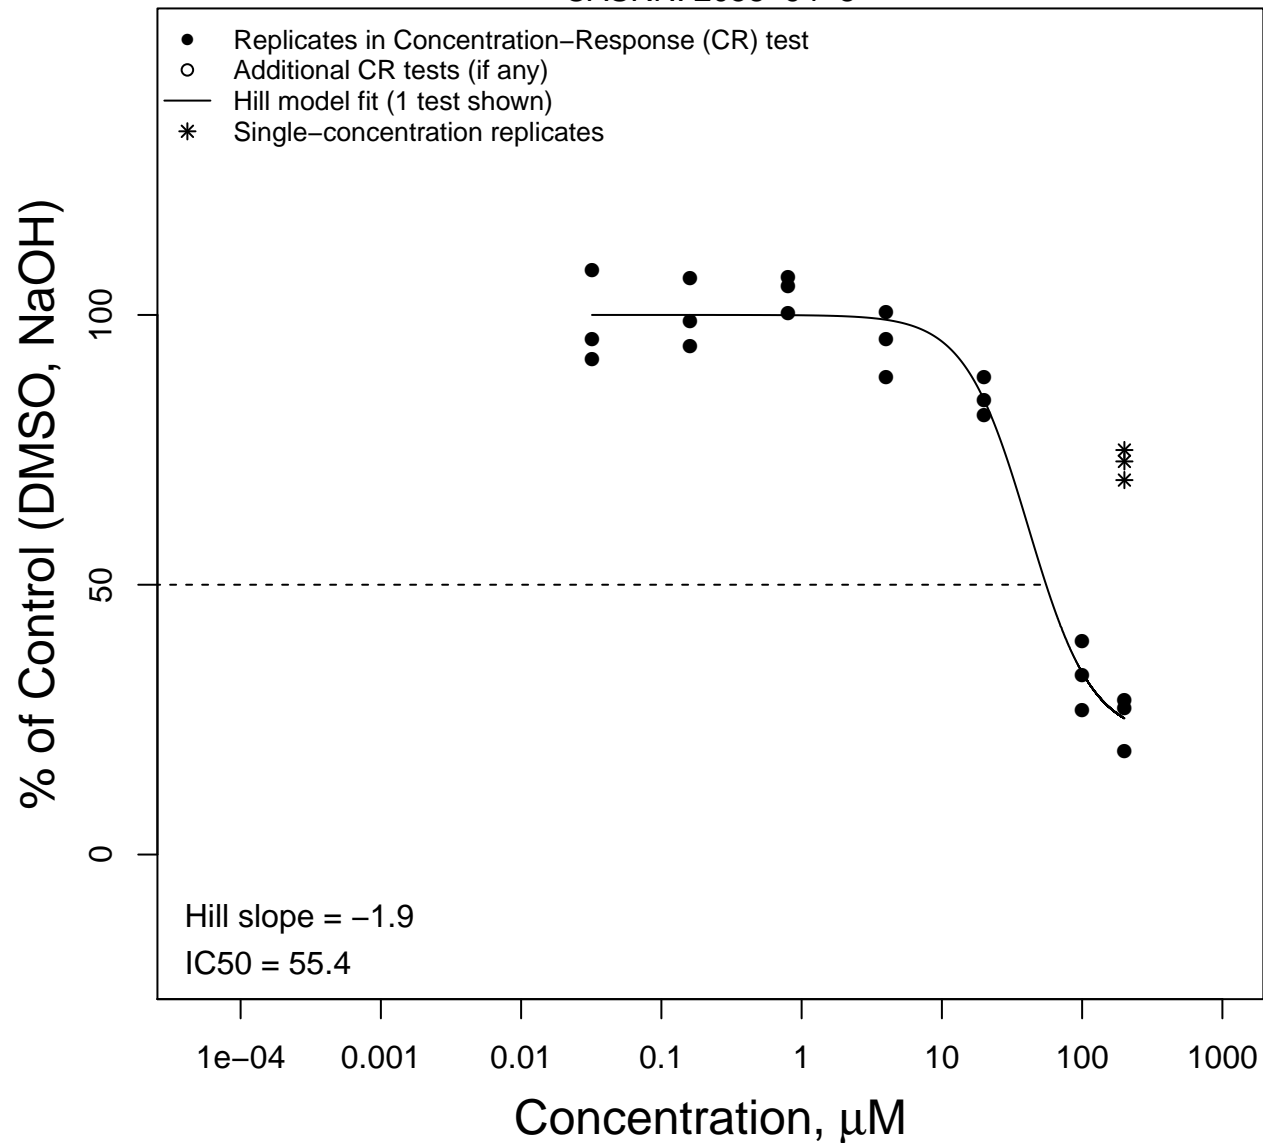

# PharmaGSID\_47337

CASRN: 1061517-62-1

- Replicates in Concentration-Response (CR) test
- Additional CR tests (if any)
- Hill model fit (1 test shown)
- \* Single-concentration replicates

% of Control (DMSO, NaOH)

100

50

0

Hill slope = -3.1

IC50 = 108.5

1e-04

0.001

0.01

0.1

1

10

100

1000

Concentration,  $\mu\text{M}$

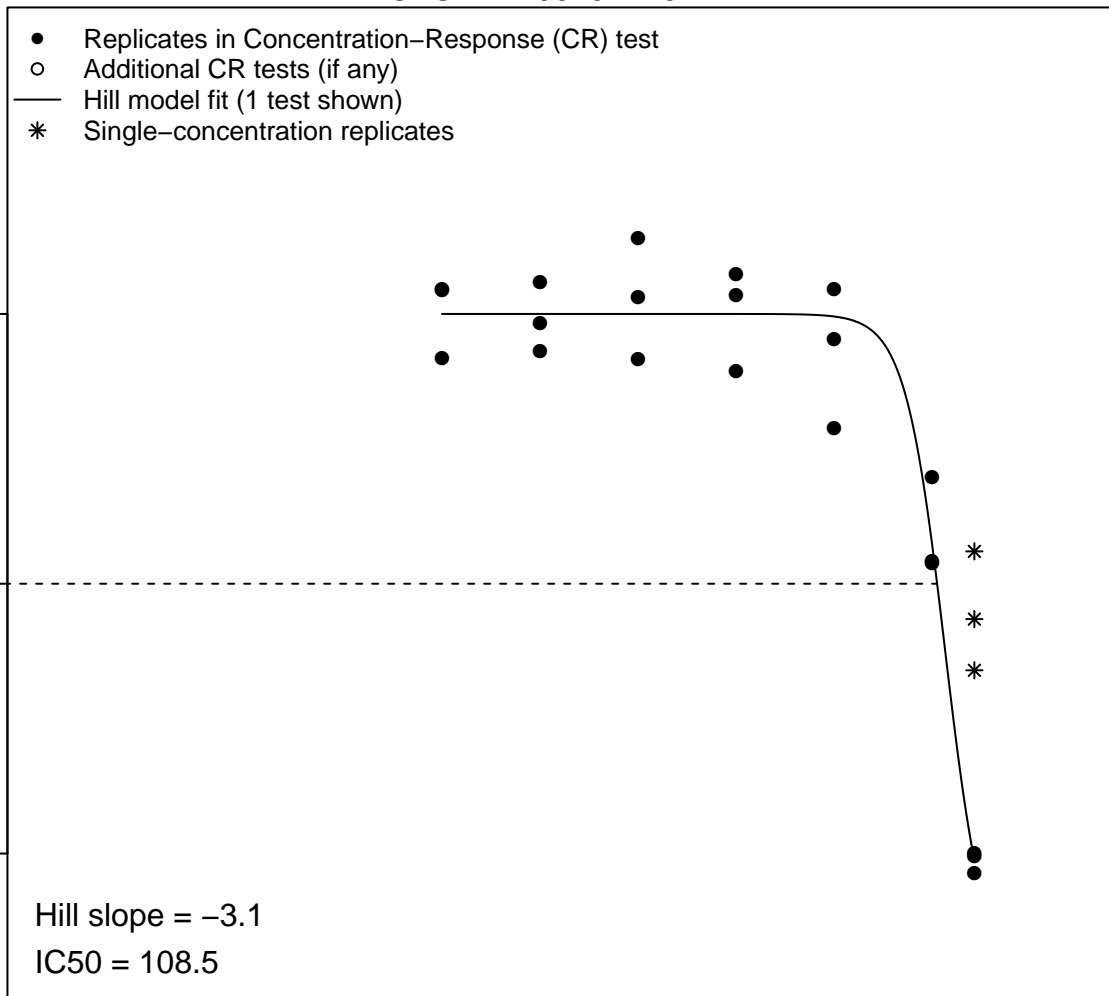

# Salicylanilide

CASRN: 87-17-2

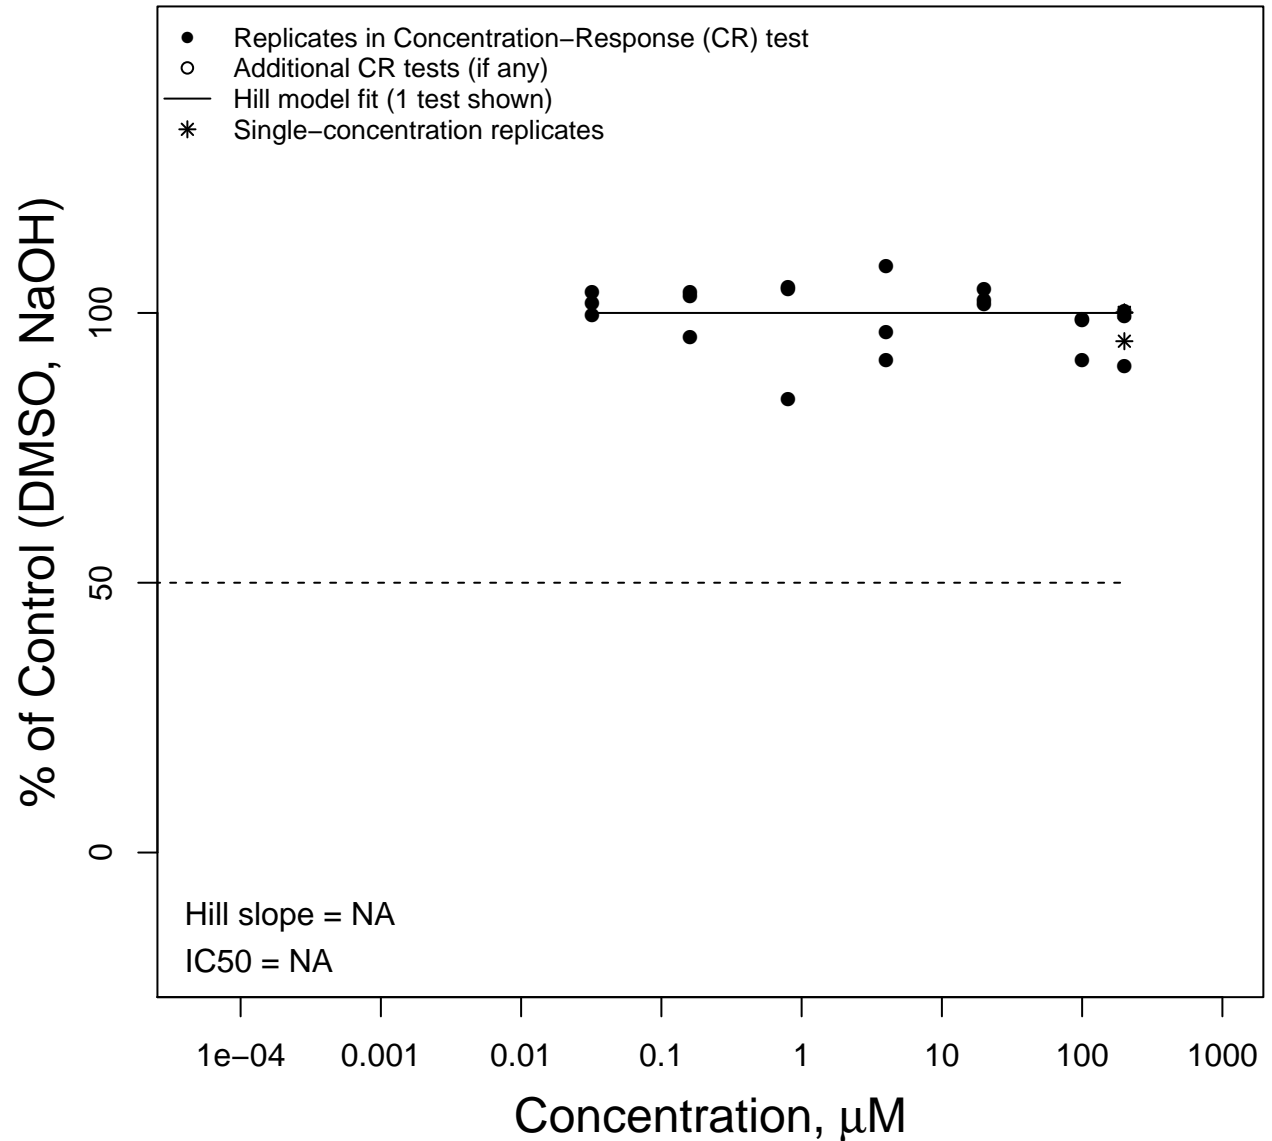

# Octyl gallate

CASRN: 1034-01-1

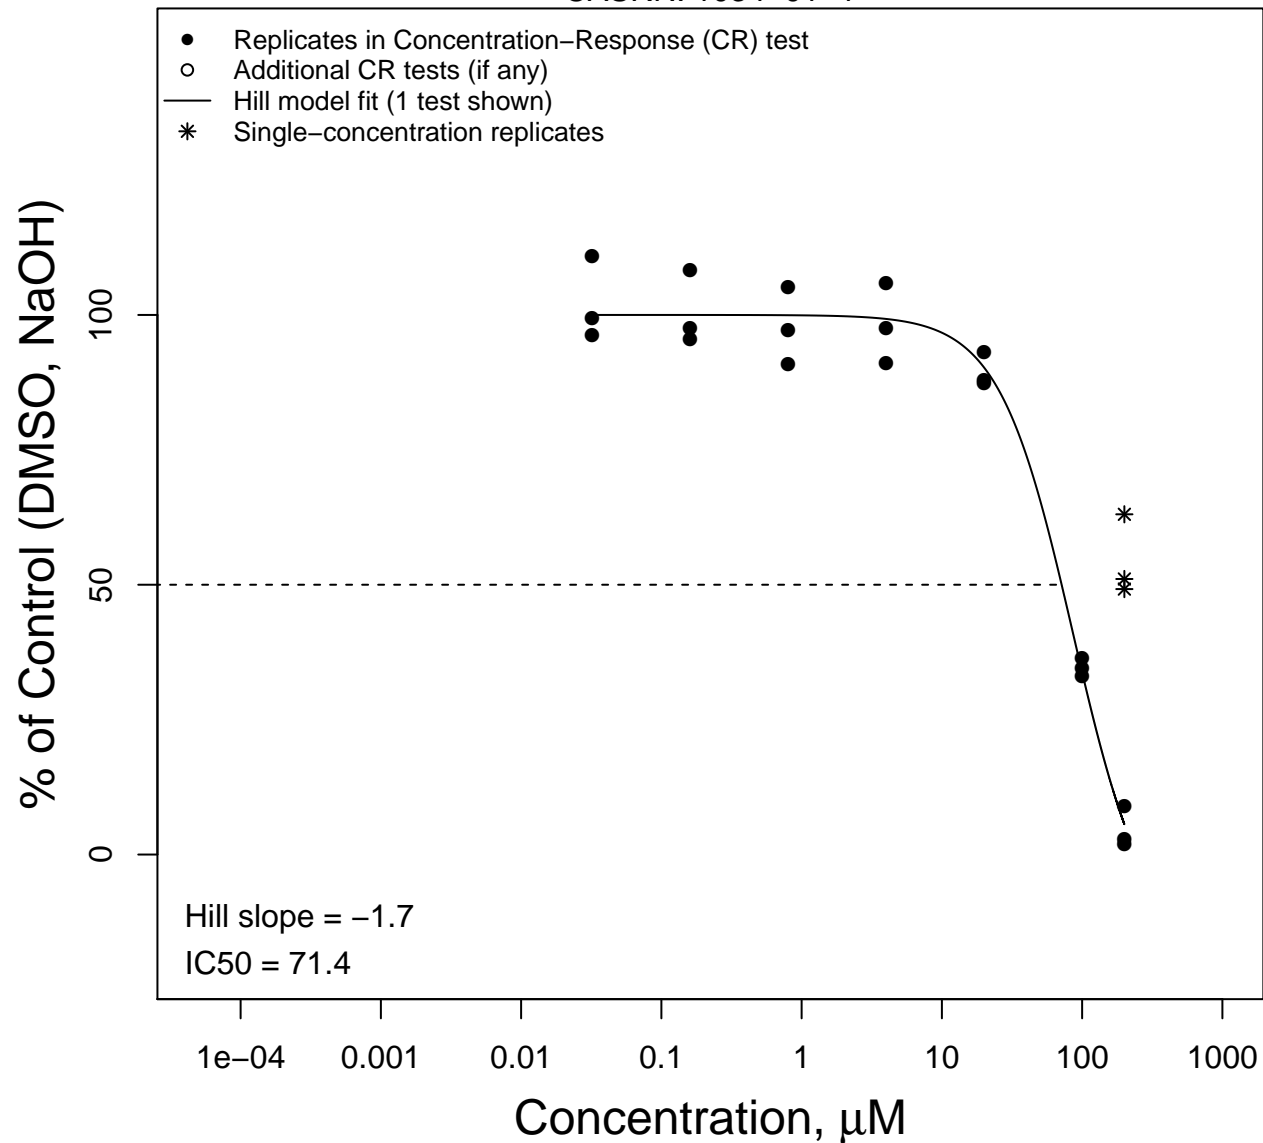

# Perfluorodecanoic acid

CASRN: 335-76-2

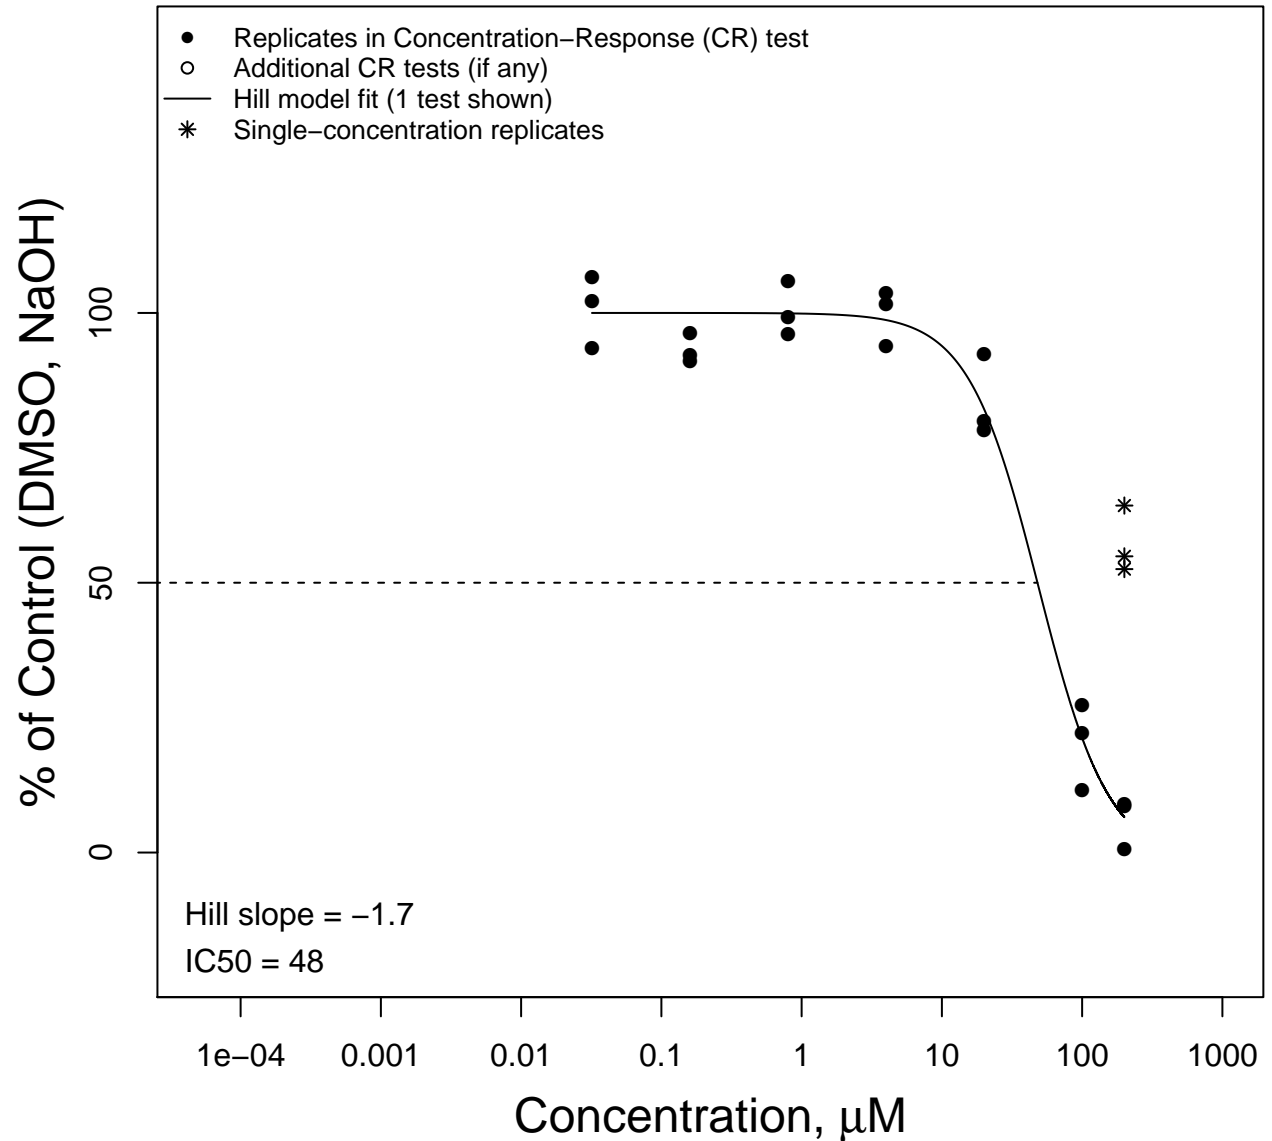

# Sodium dodecyl sulfate

CASRN: 151-21-3

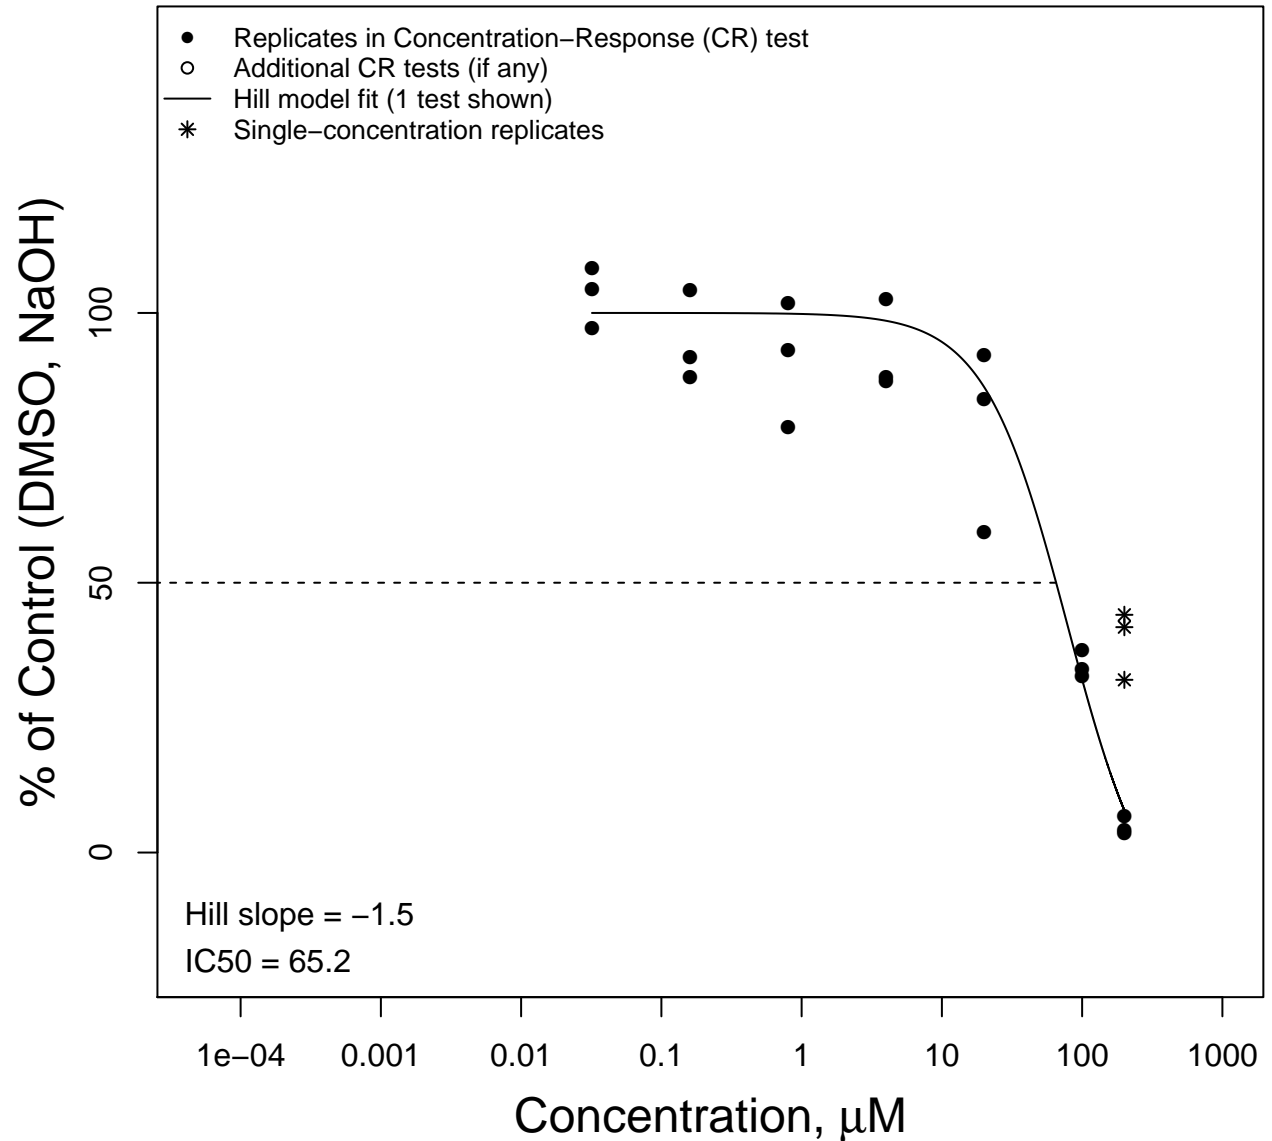

# Sodium myristyl sulfate

CASRN: 1191-50-0

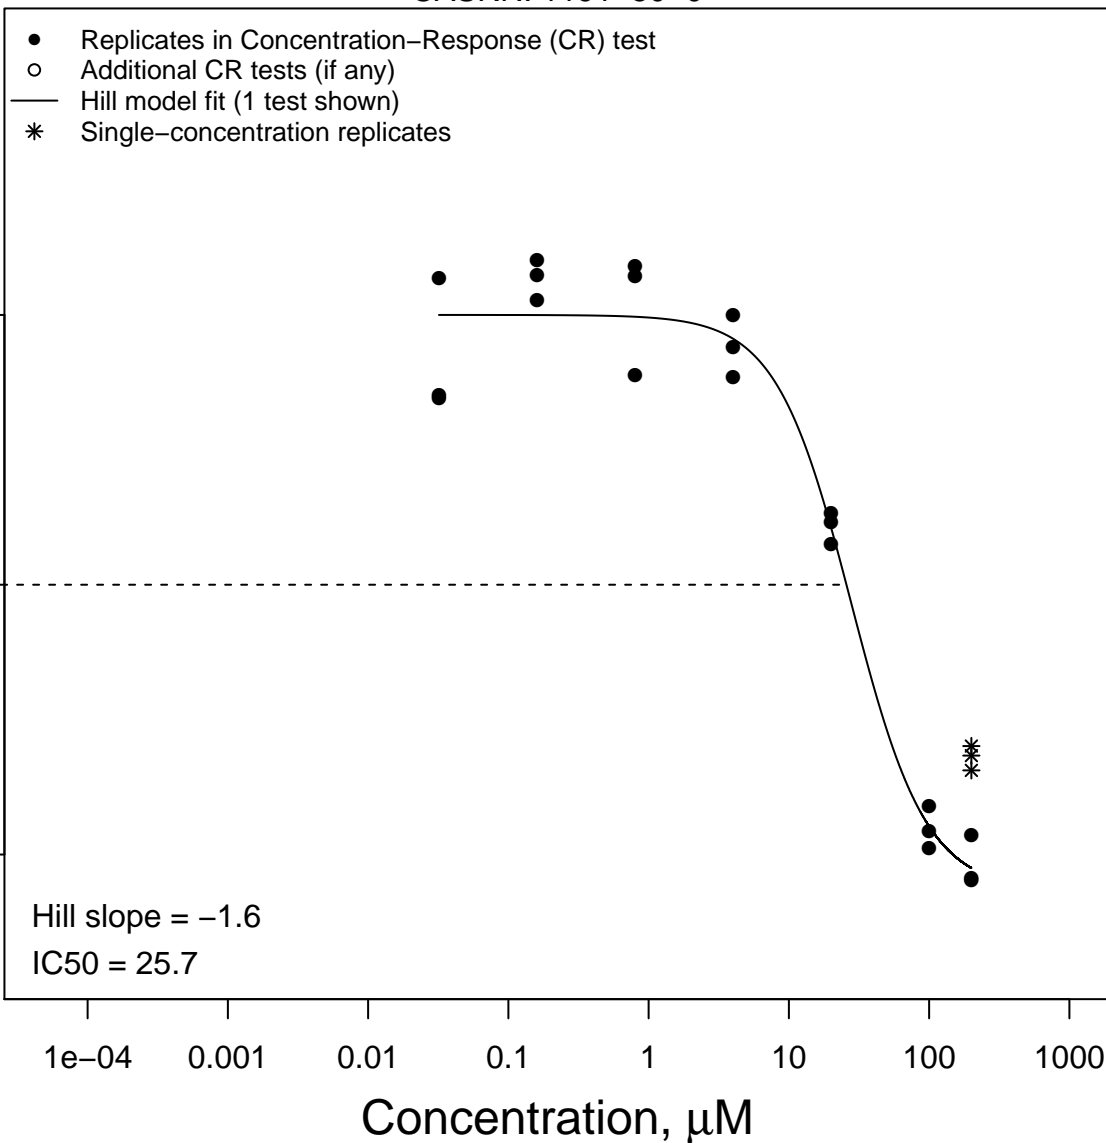



# Acetochlor

CASRN: 34256-82-1

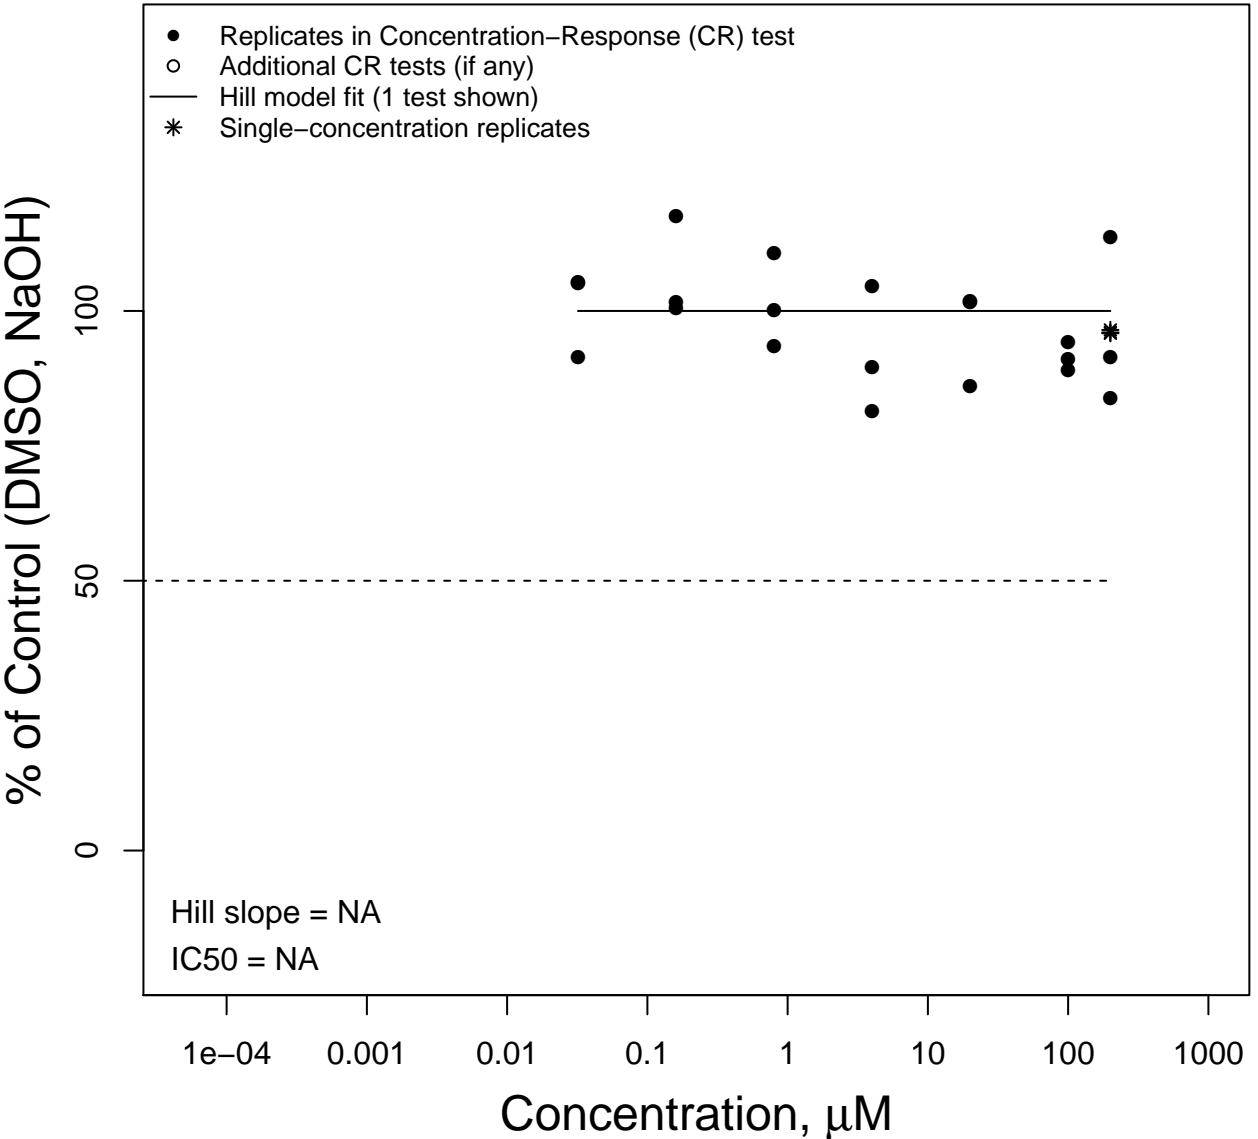

# Sodium dodecylbenzenesulfonate

CASRN: 25155-30-0

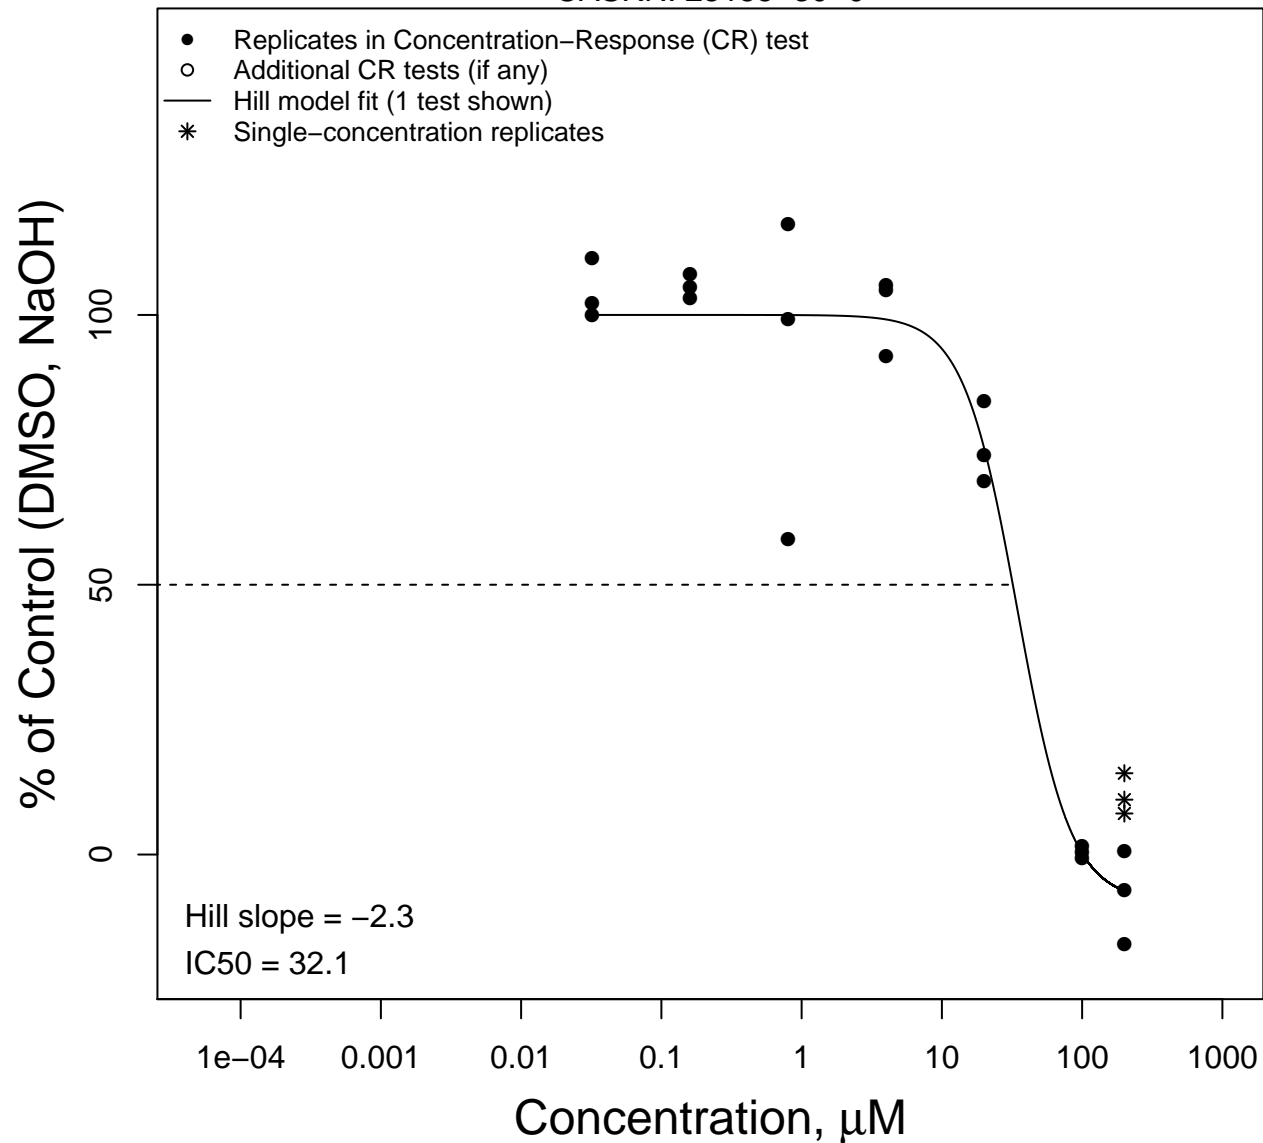

# 4-Nonylphenol

CASRN: 104-40-5

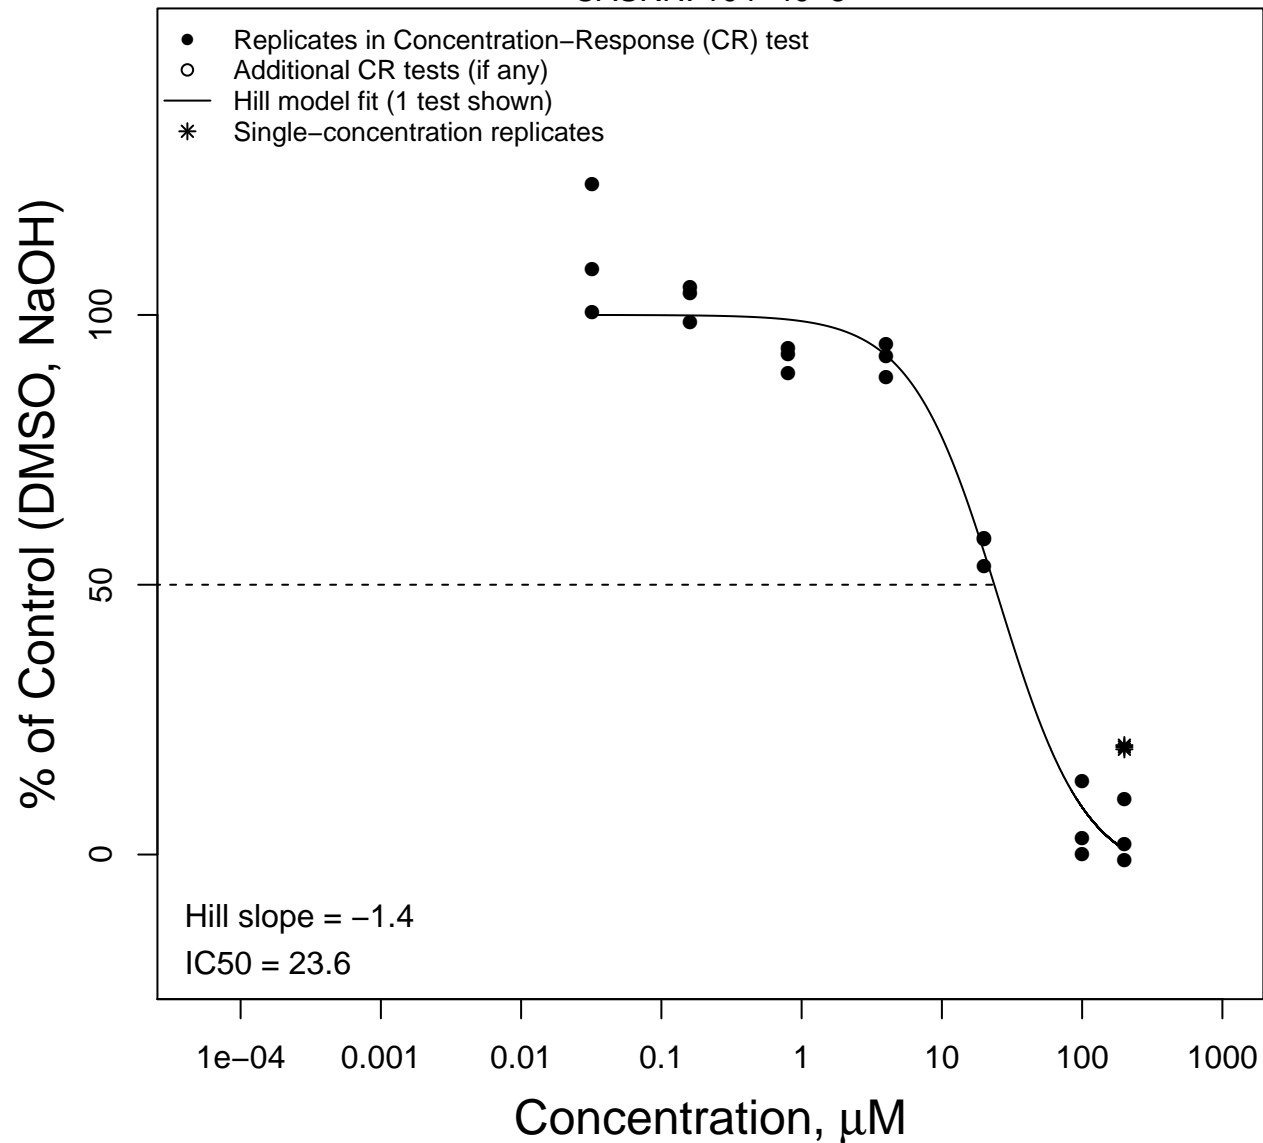

# Sodium hexyldecyl sulfate

CASRN: 1120-01-0

- Replicates in Concentration-Response (CR) test
- Additional CR tests (if any)
- Hill model fit (1 test shown)
- \* Single-concentration replicates

% of Control (DMSO, NaOH)

100

50

0

Hill slope = -1.9

IC50 = 29.5

1e-04

0.001

0.01

0.1

1

10

100

1000

Concentration,  $\mu\text{M}$

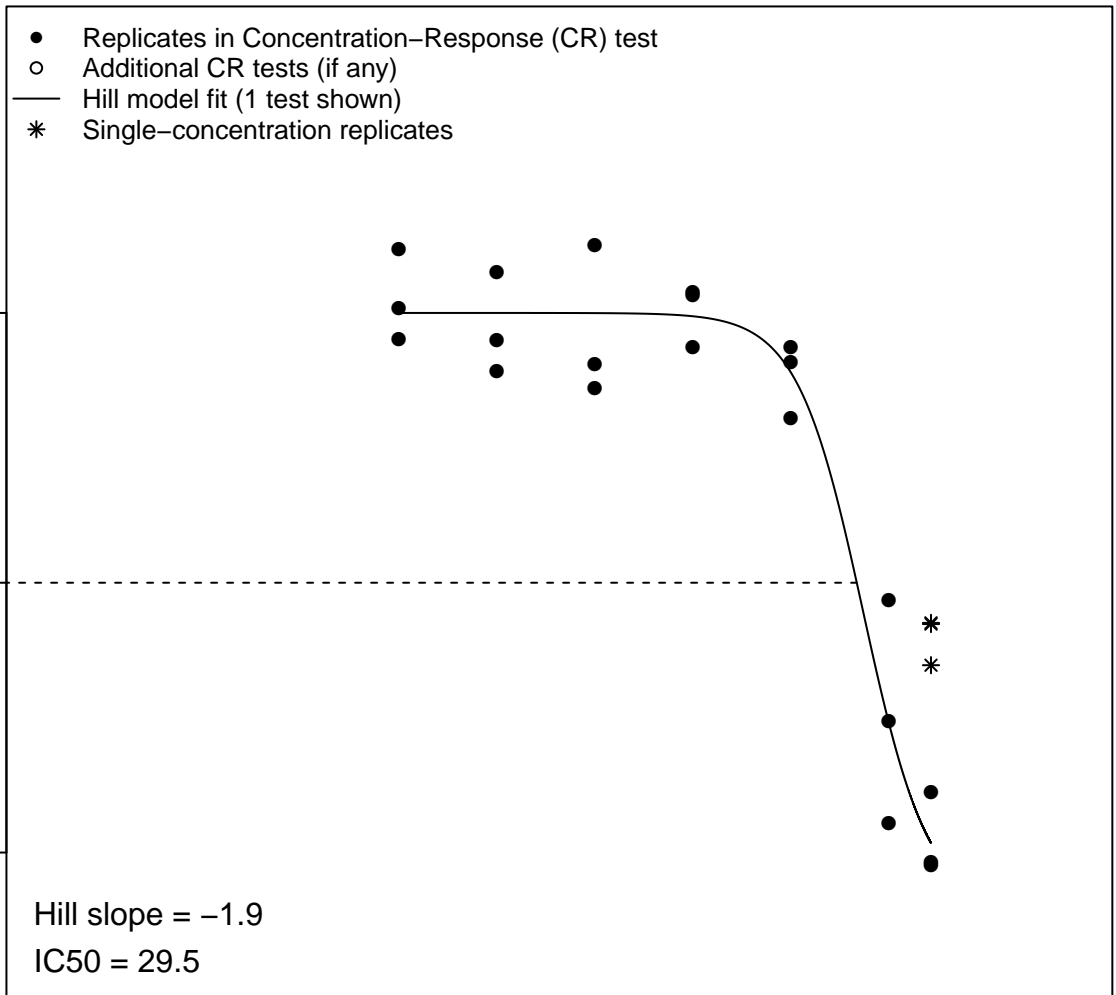

# Troglitazone

CASRN: 97322-87-7

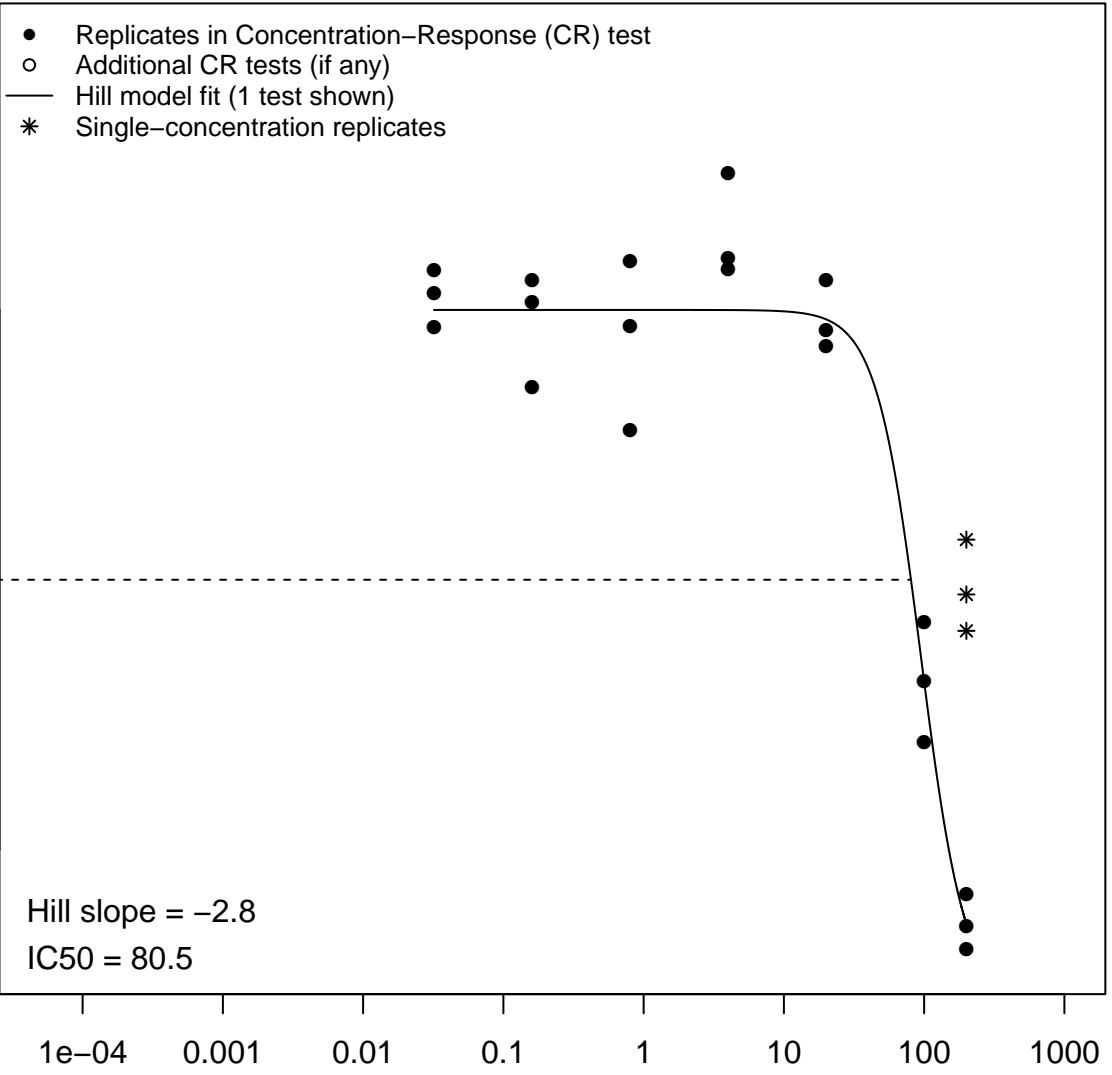

% of Control (DMSO, NaOH)

Concentration, µM

# 2,2',4,4'-Tetrahydroxybenzophenone

CASRN: 131-55-5

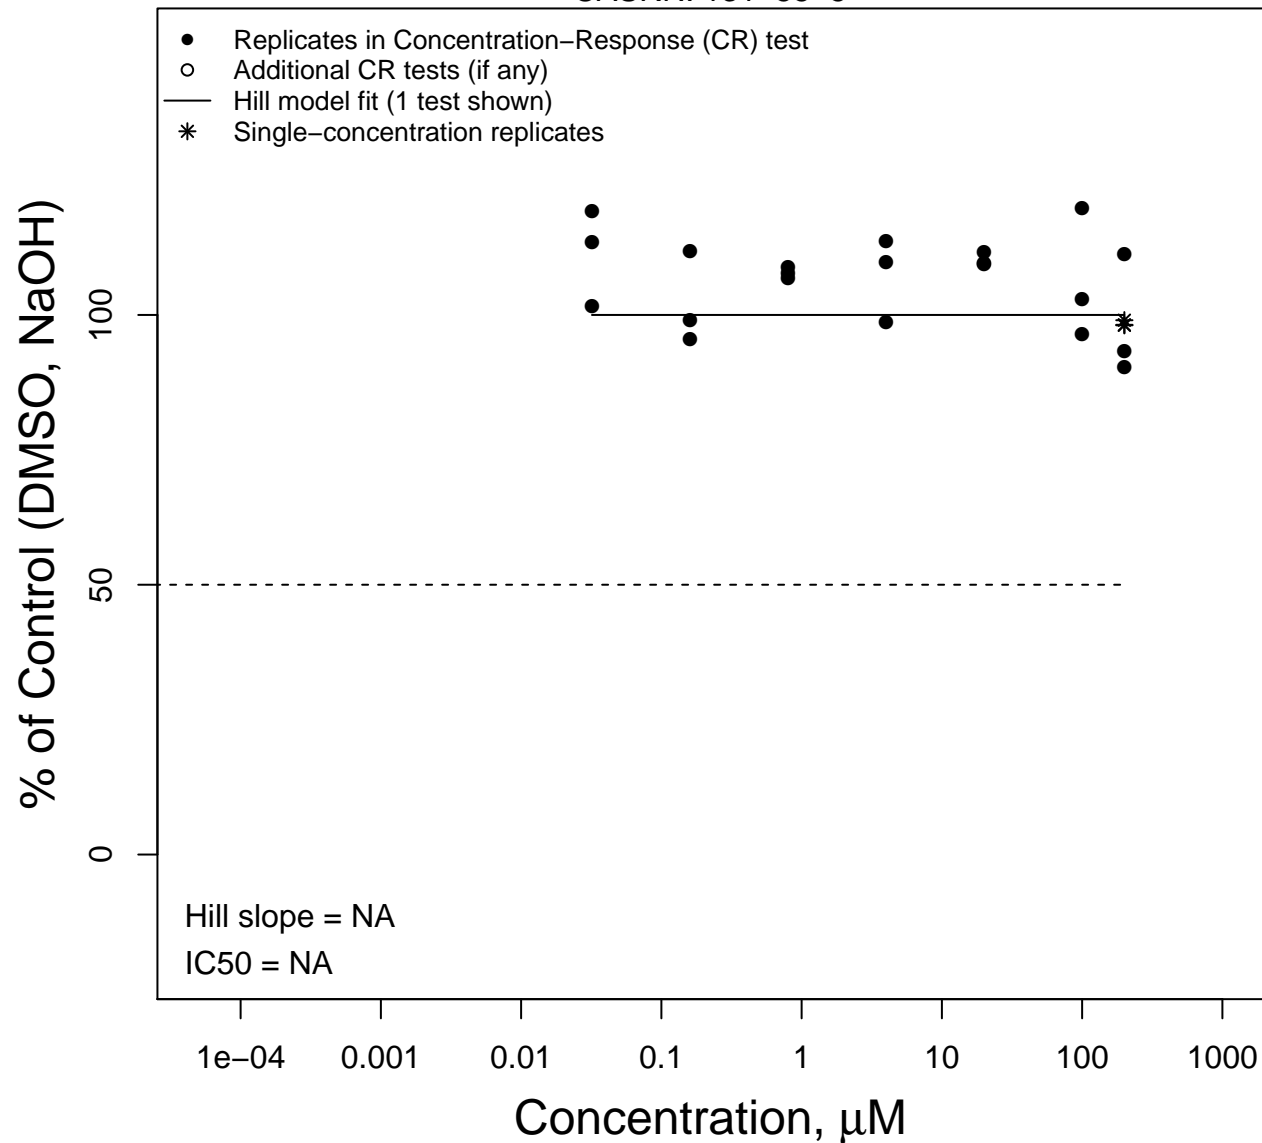

# Tamoxifen

CASRN: 10540-29-1

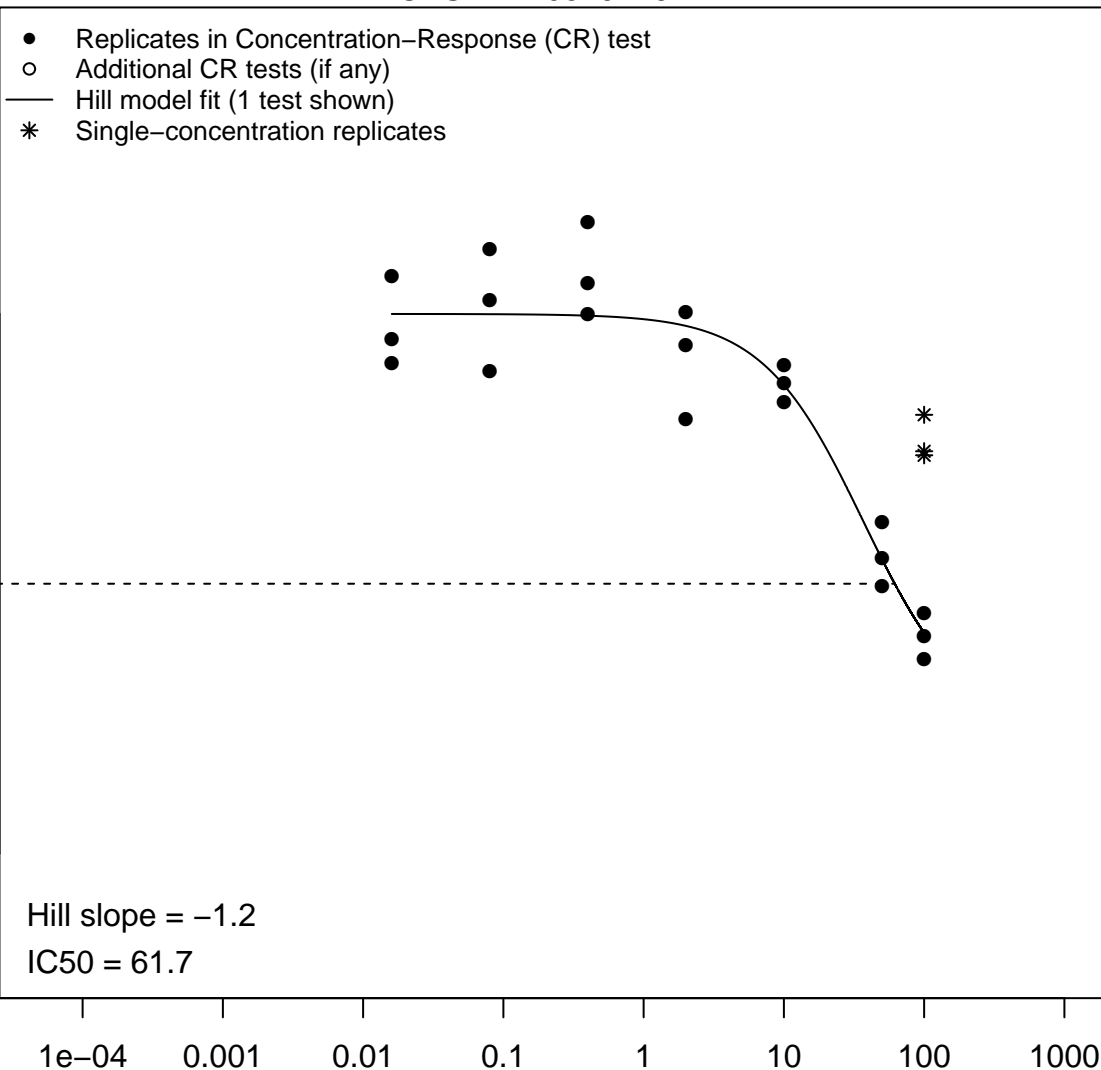

Concentration,  $\mu\text{M}$

% of Control (DMSO, NaOH)

# Tannic acid

CASRN: 1401-55-4

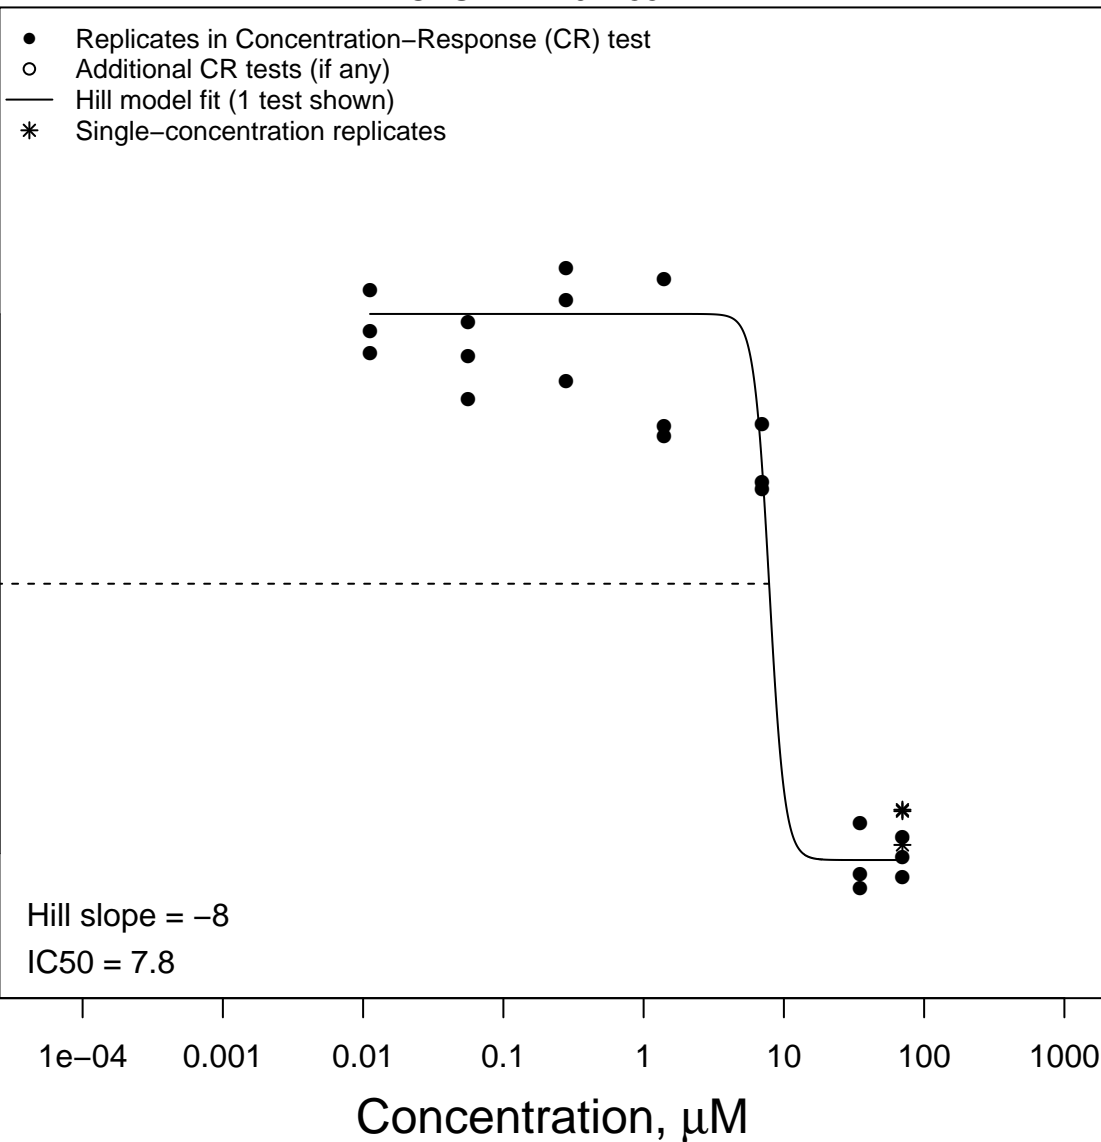



# UK-337312

CASRN: 203942-49-8

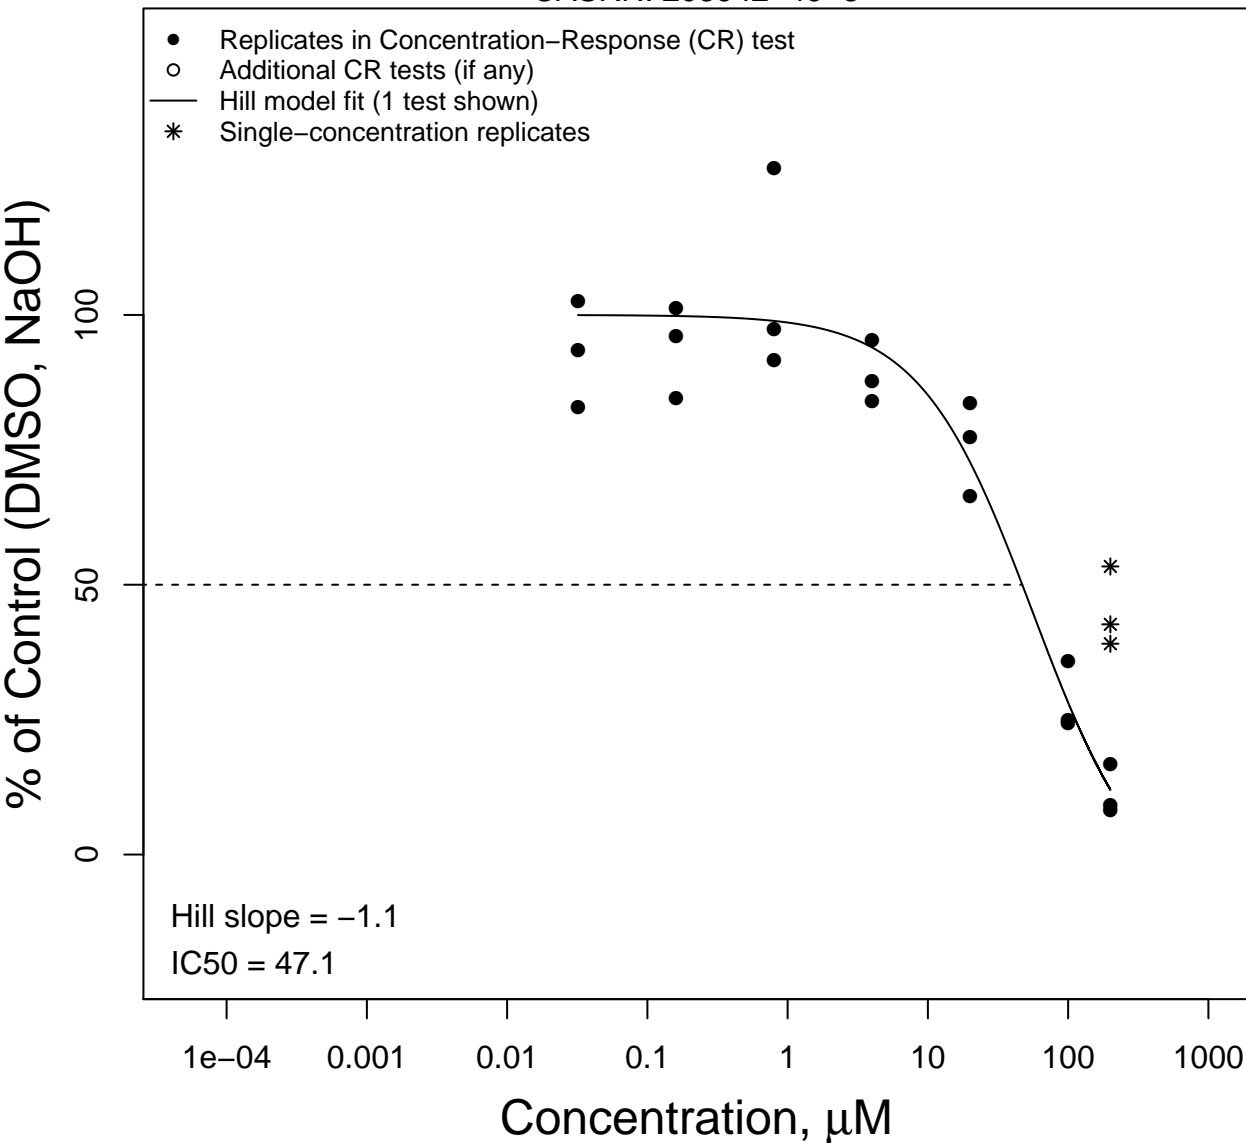

# Tamoxifen citrate

CASRN: 54965-24-1

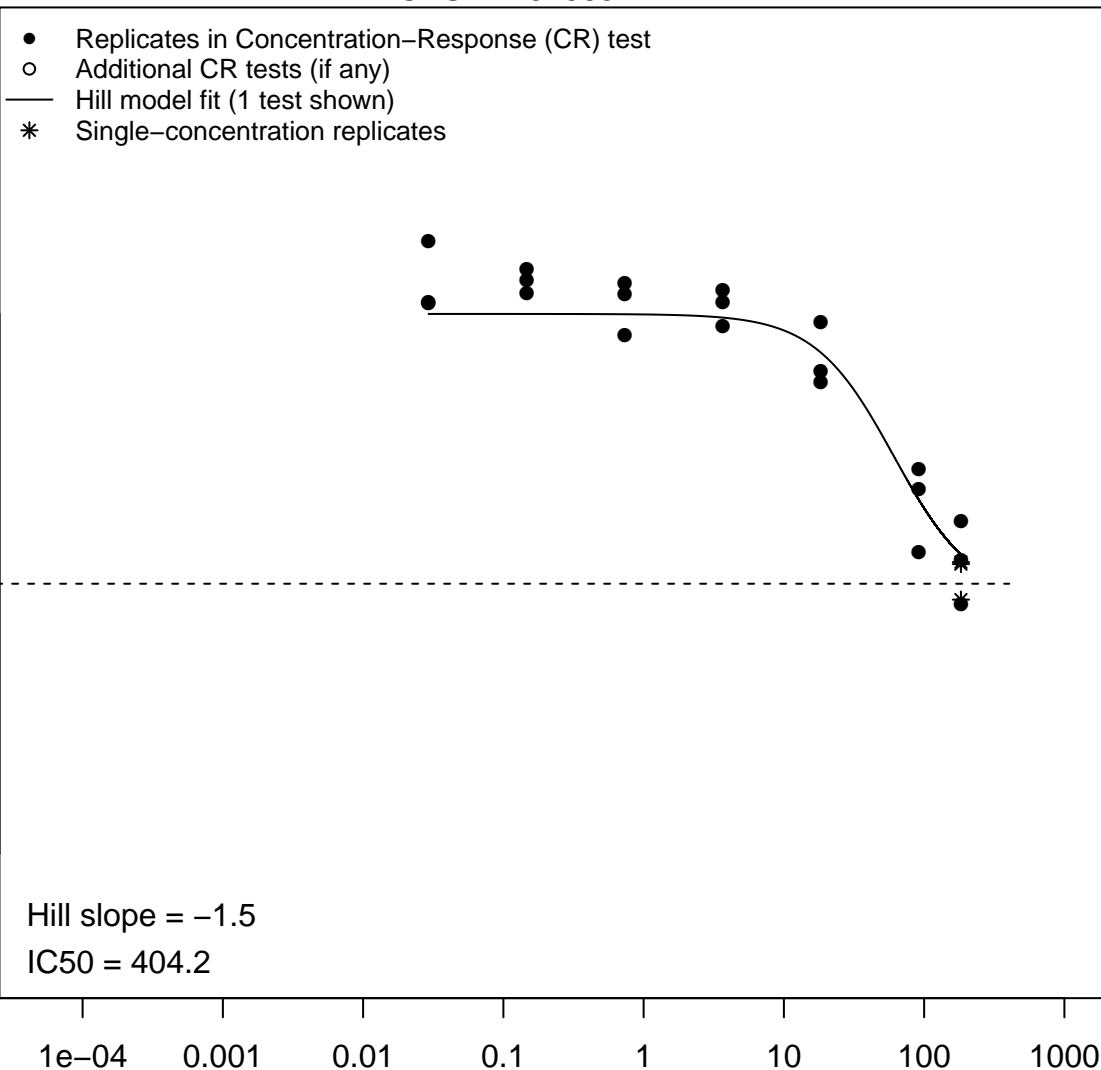

Concentration, µM

% of Control (DMSO, NaOH)

# Methylene blue

CASRN: 61-73-4

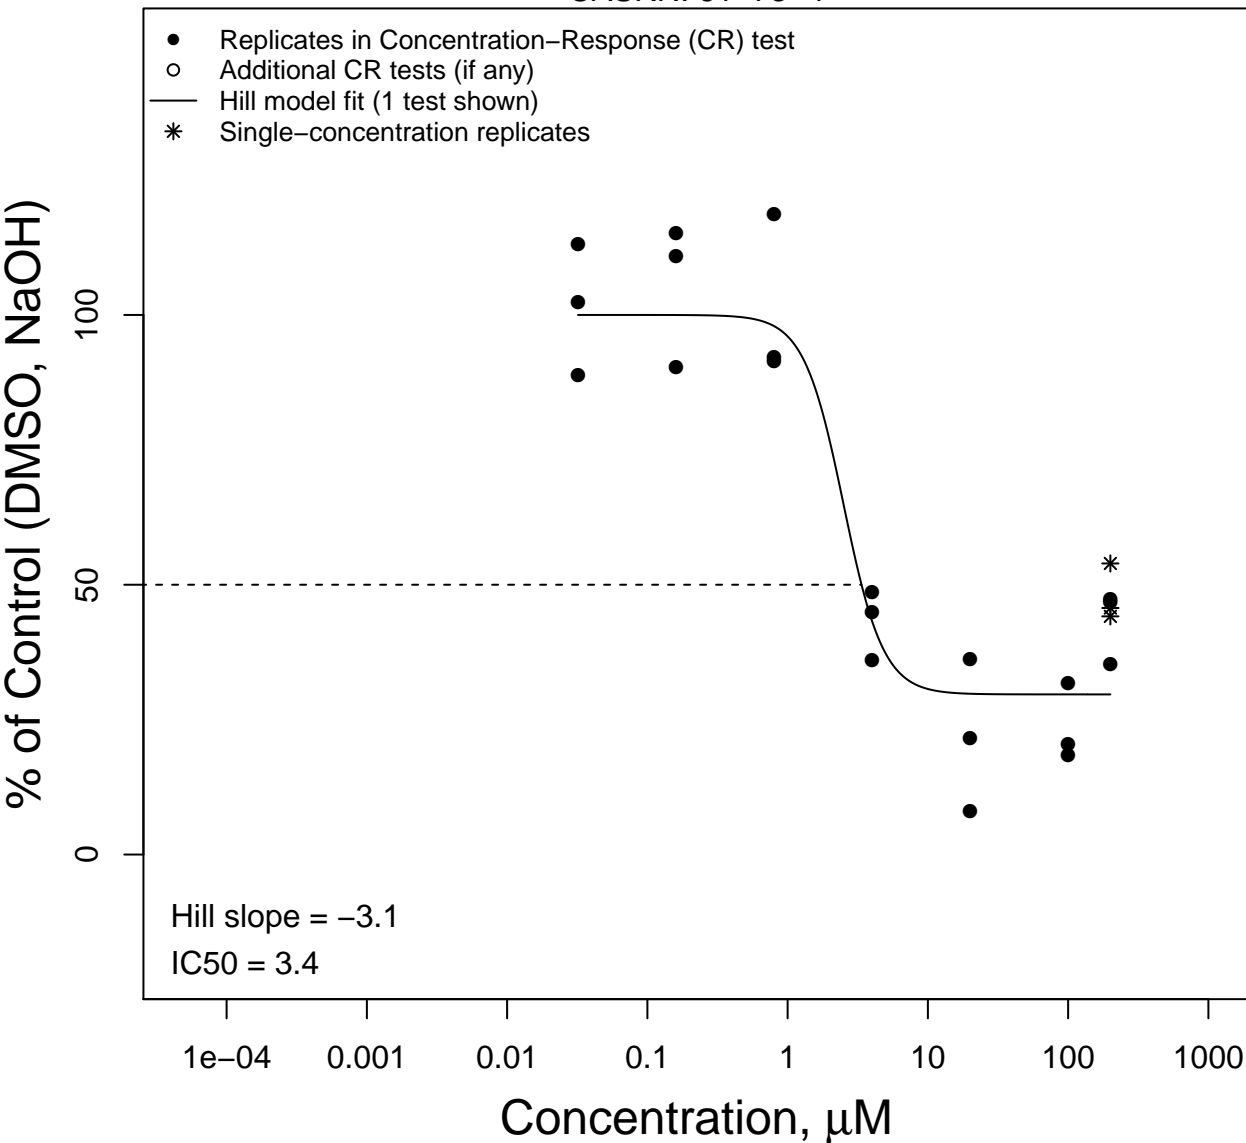

# Eosin

CASRN: 17372-87-1

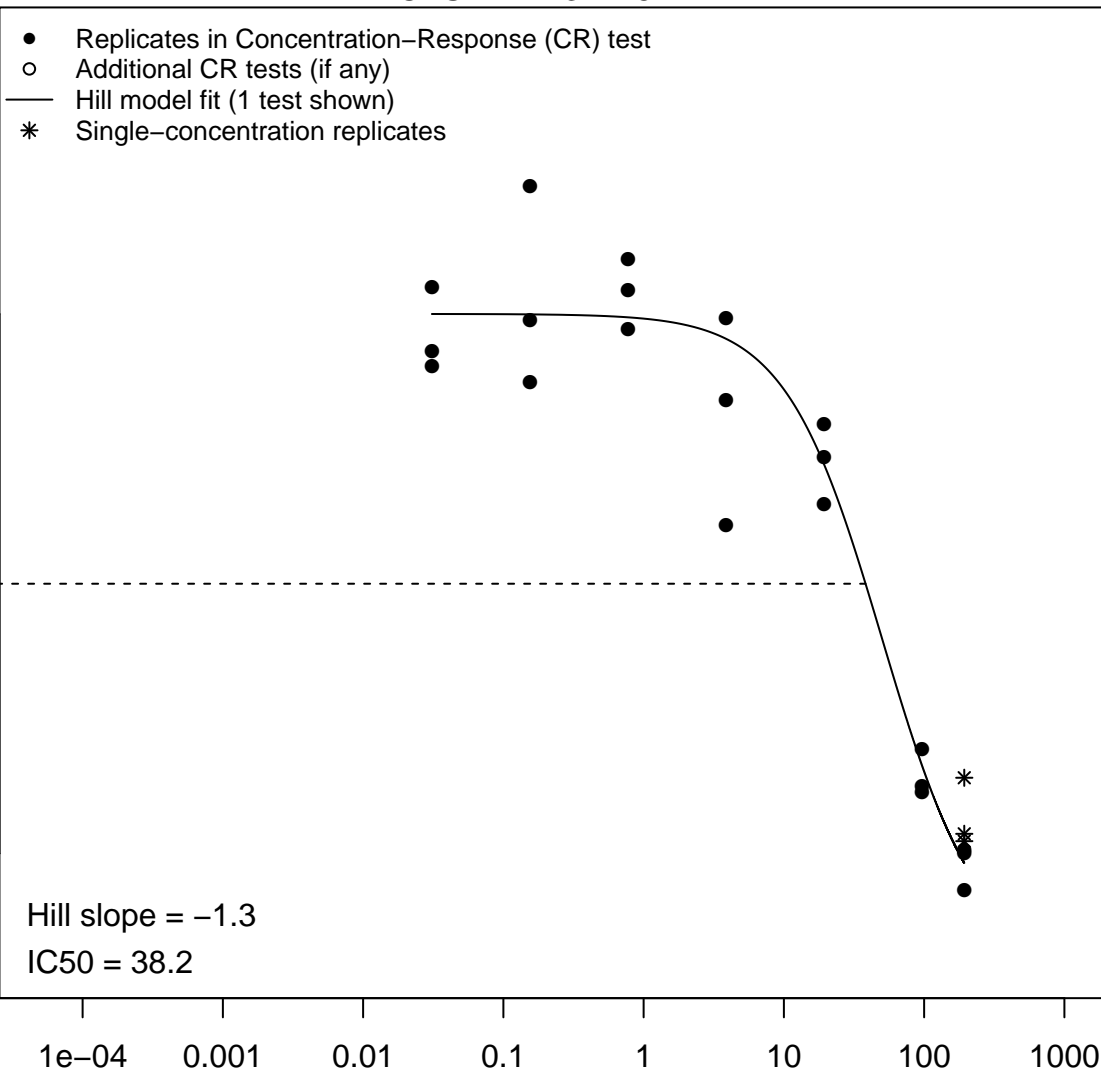

Concentration, µM

% of Control (DMSO, NaOH)

# Fluorescein

CASRN: 2321-07-5

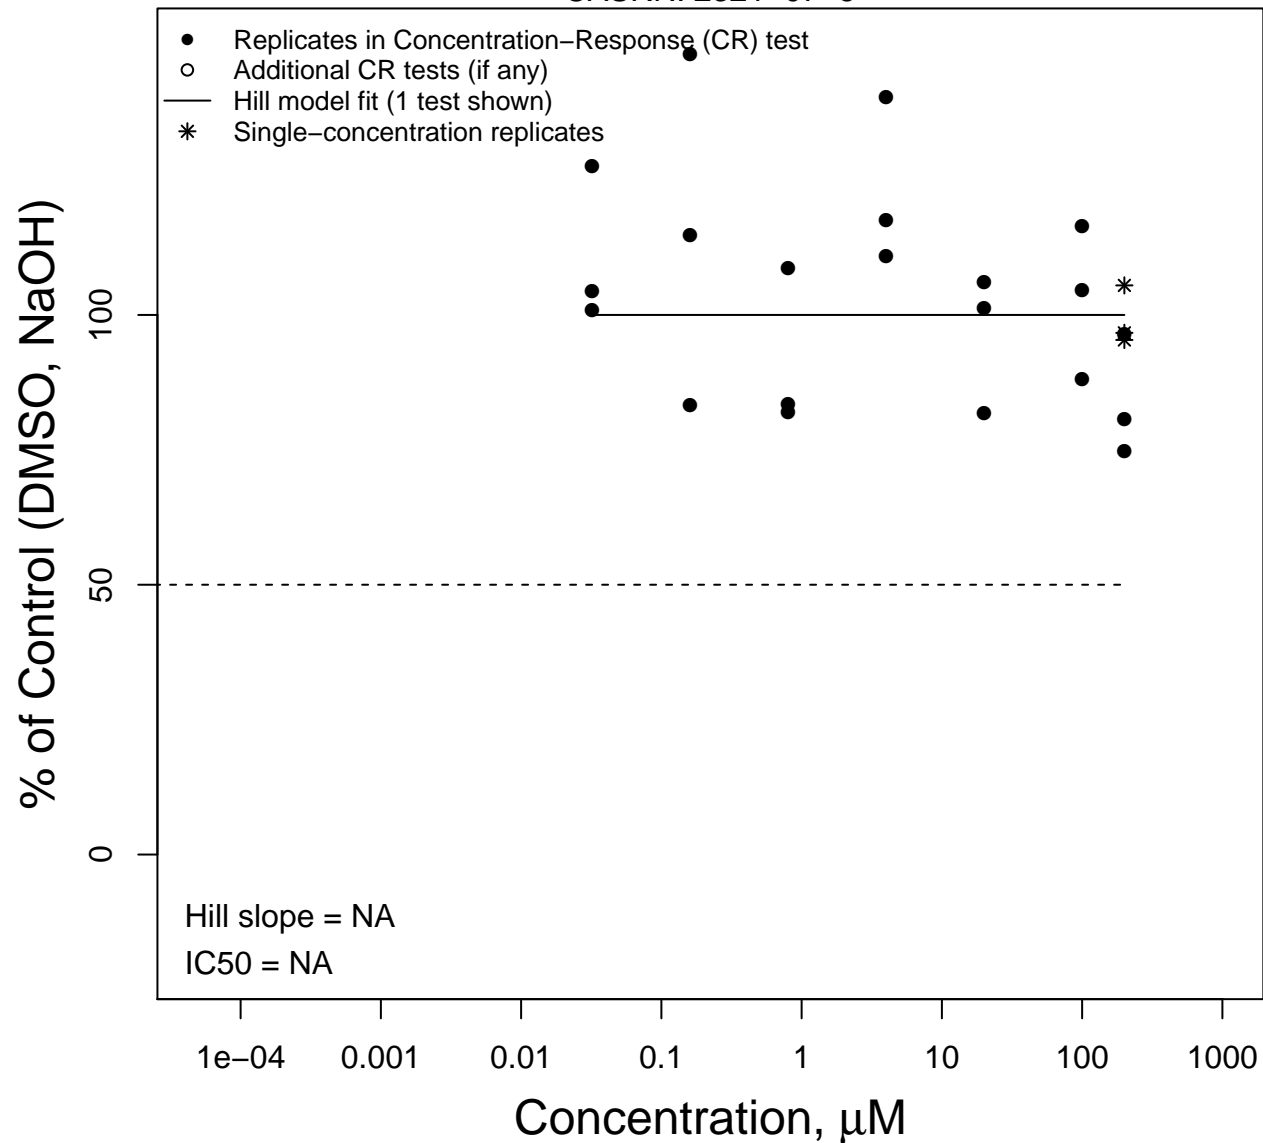

# Tetradecanoic acid, 2,3-dihydroxypropyl ester

CASRN: 589-68-4

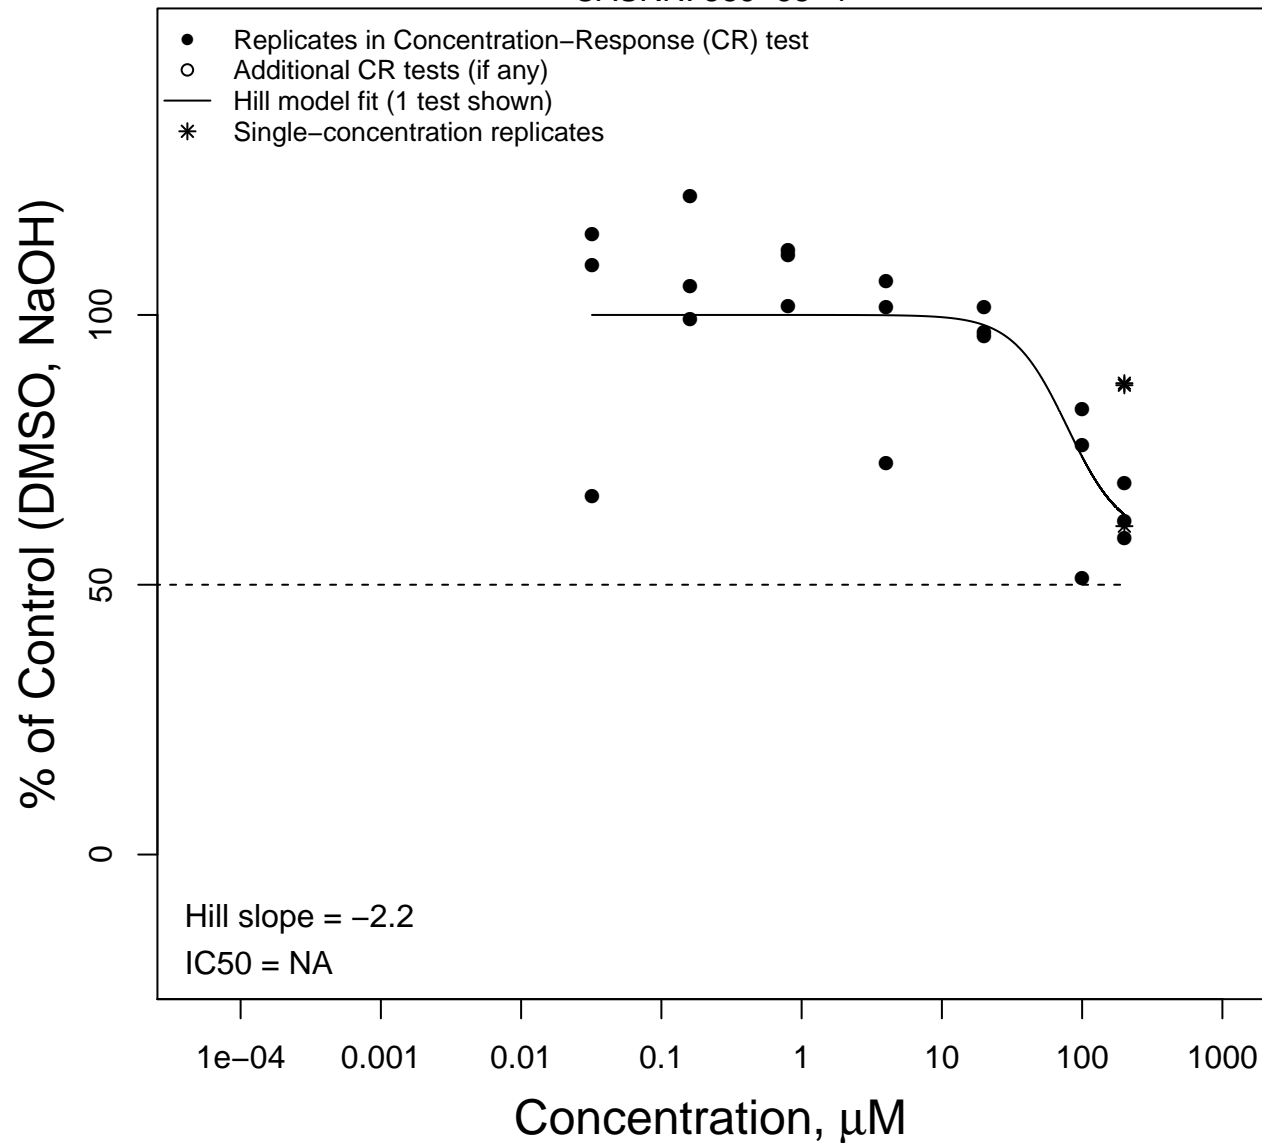

# Octylparaben

CASRN: 1219-38-1

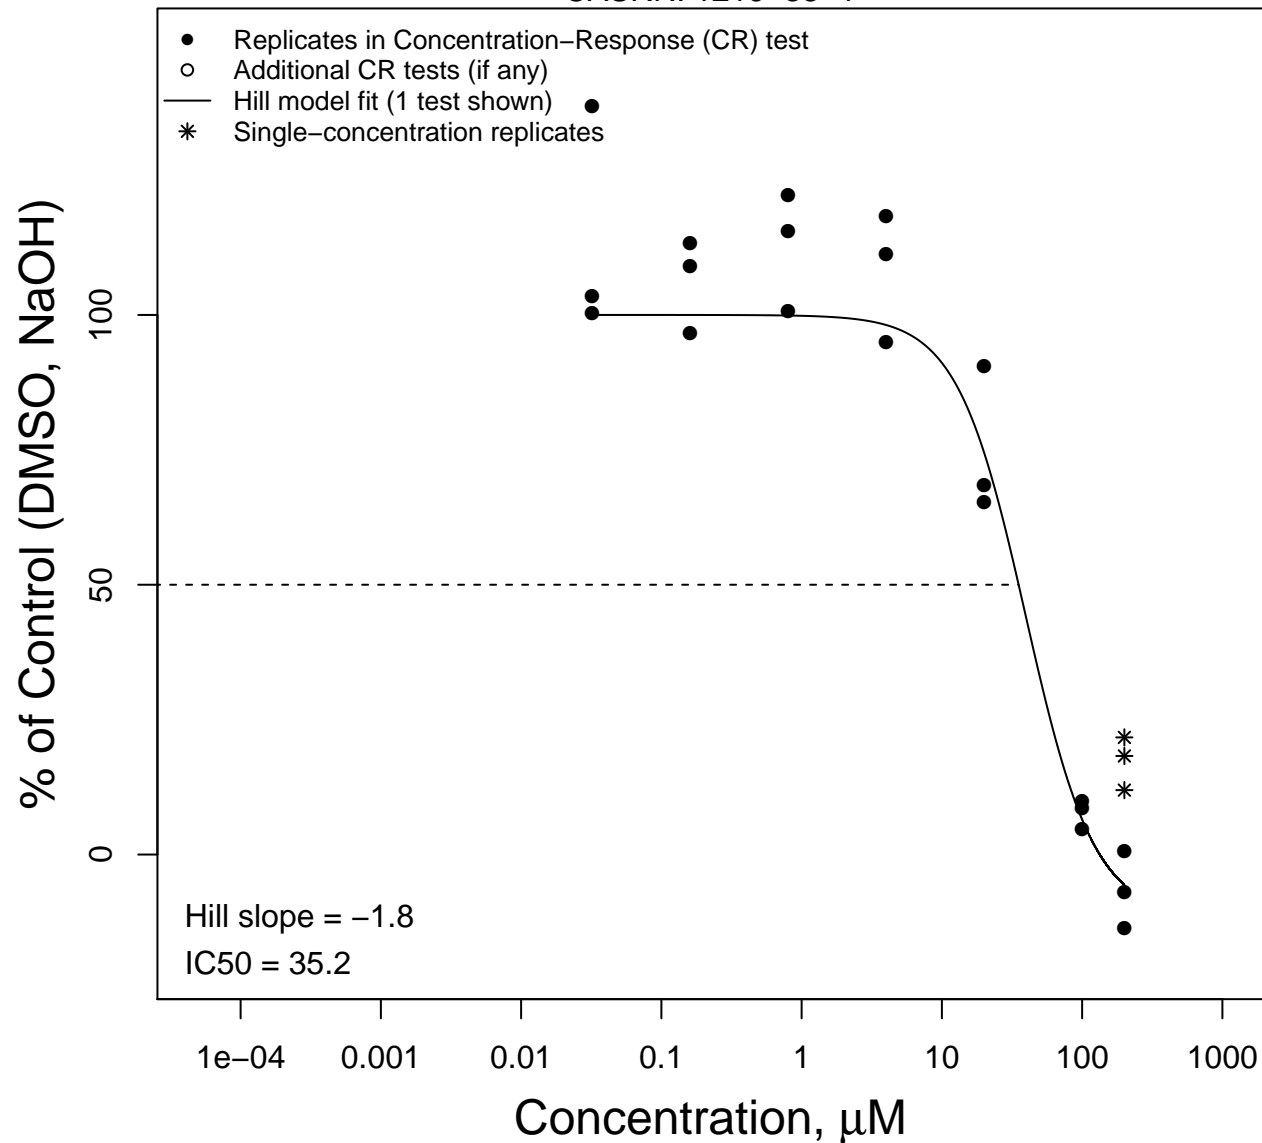

# Monotridecyl phosphate

CASRN: 5116-94-9

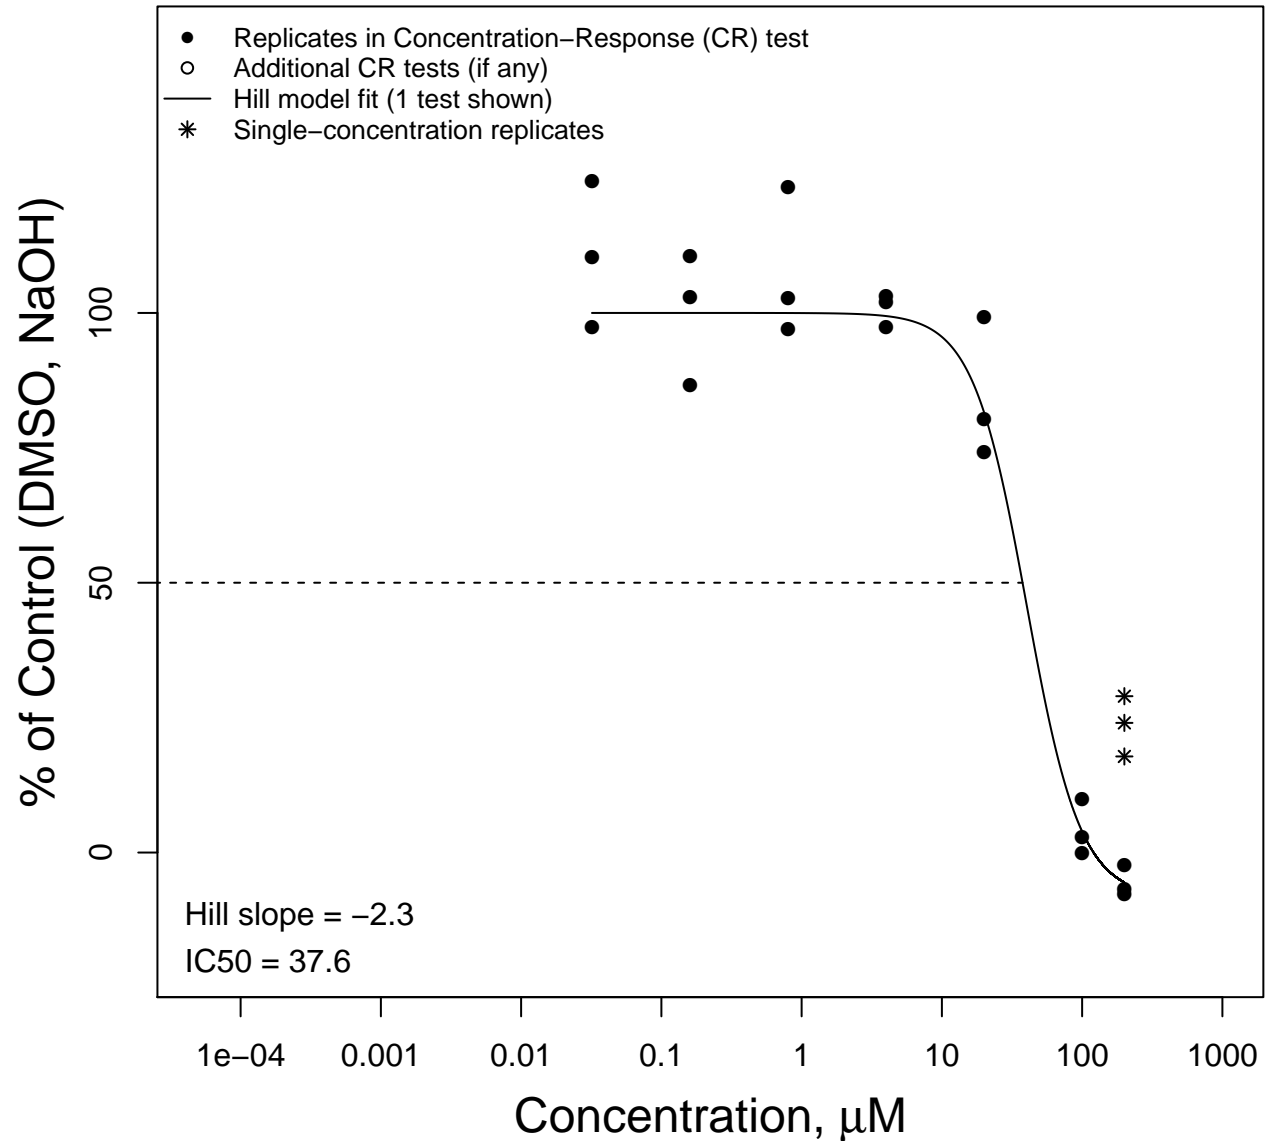



# Calcium dodecylbenzene sulfonate

CASRN: 26264-06-2

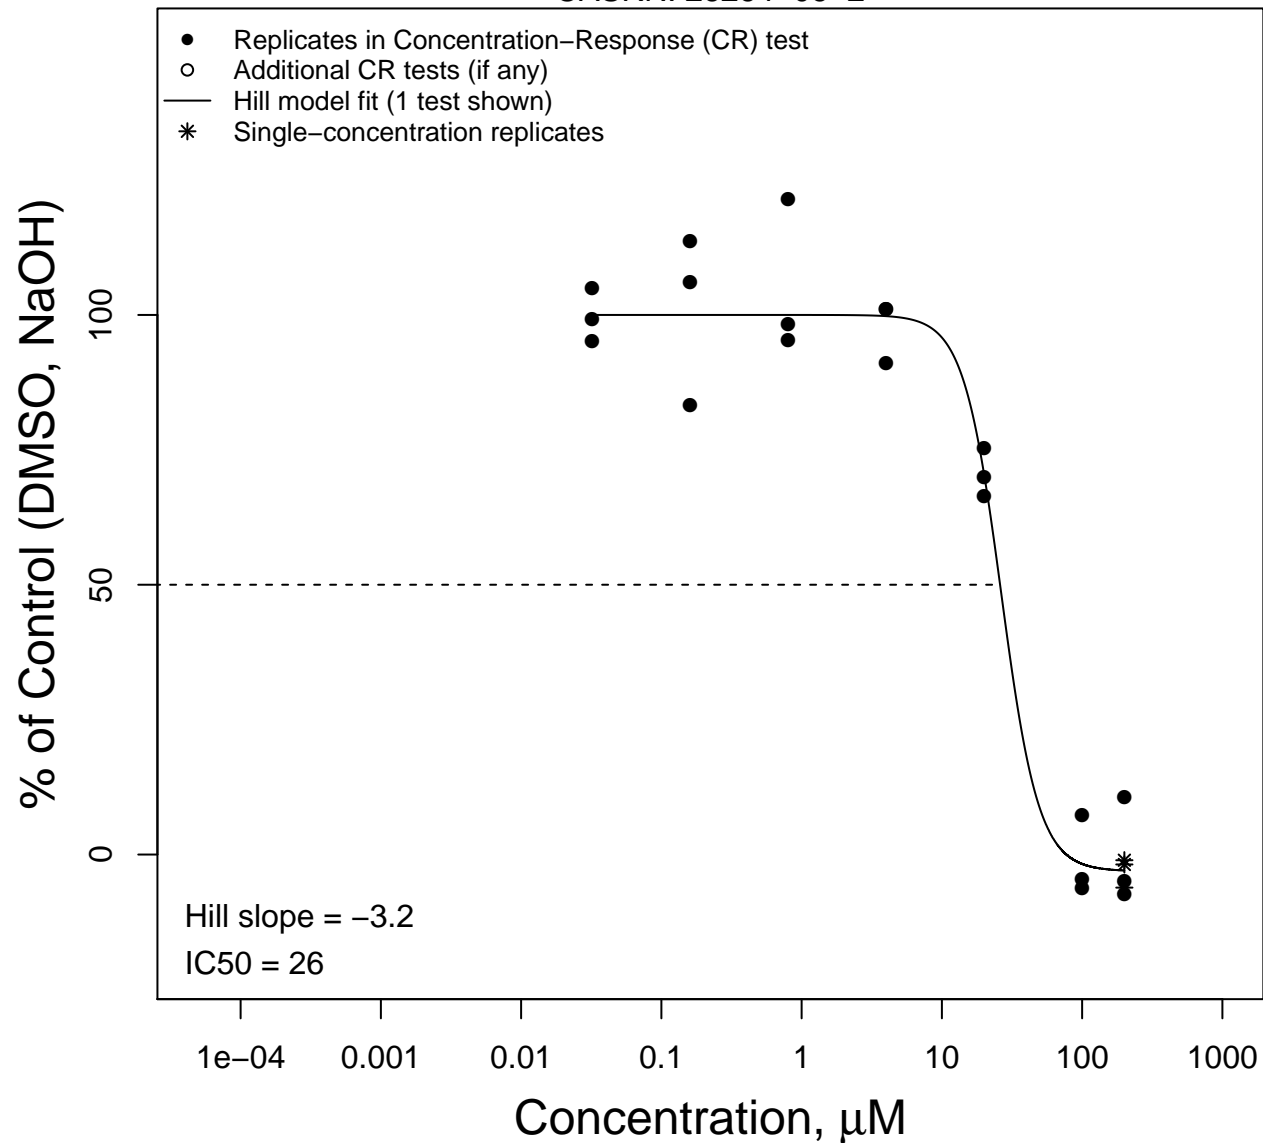

# Dodecylphenol

CASRN: 27193-86-8

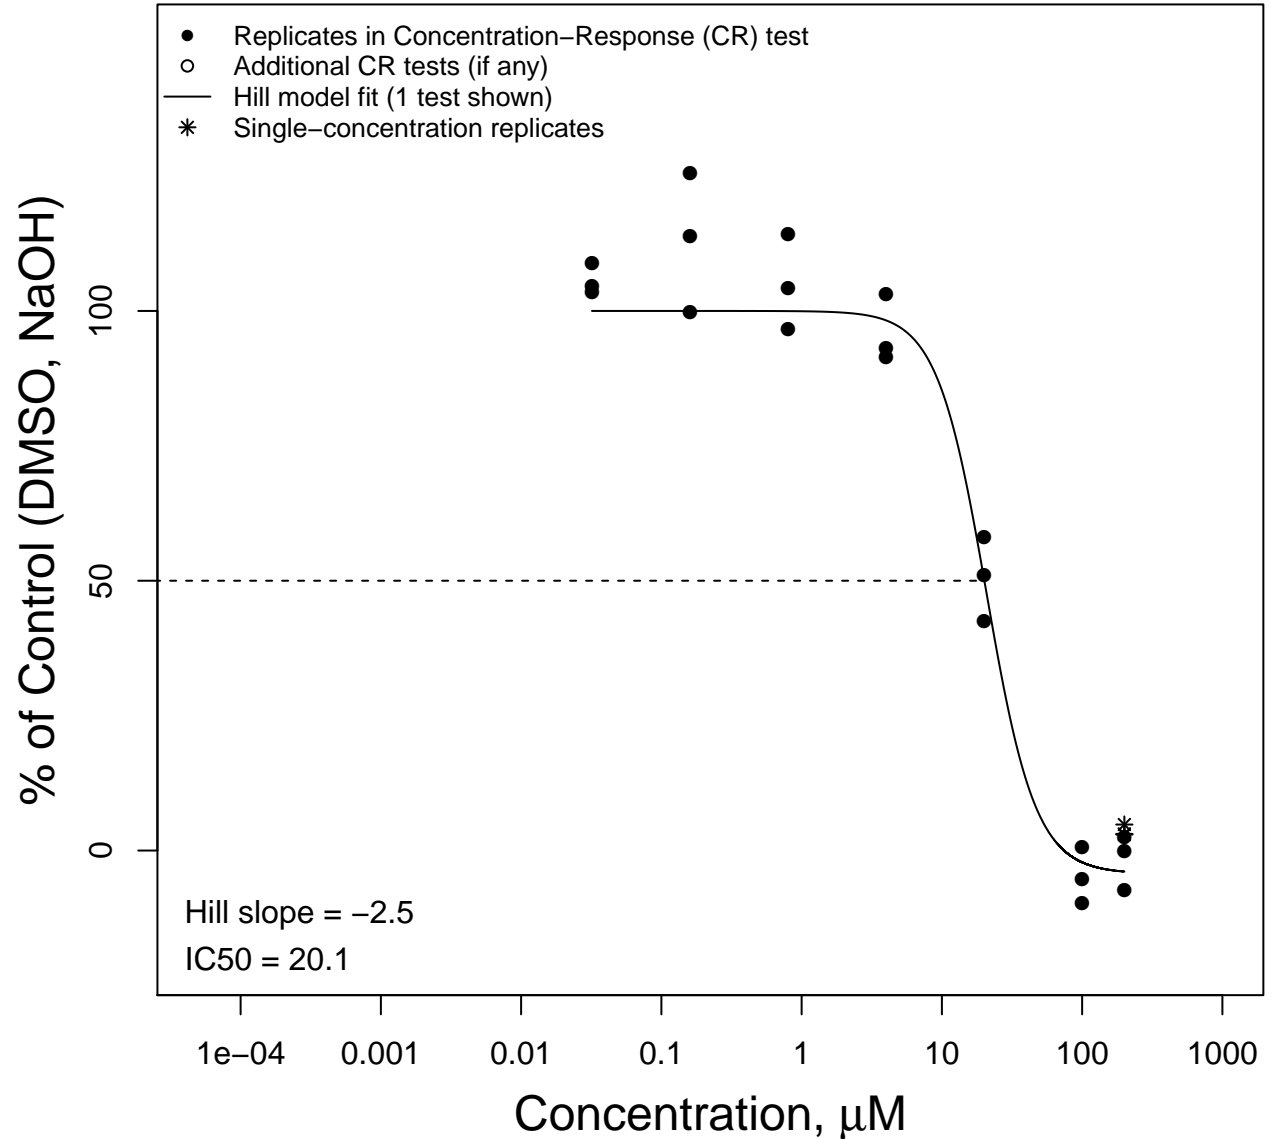

# Lauryl gallate

CASRN: 1166-52-5

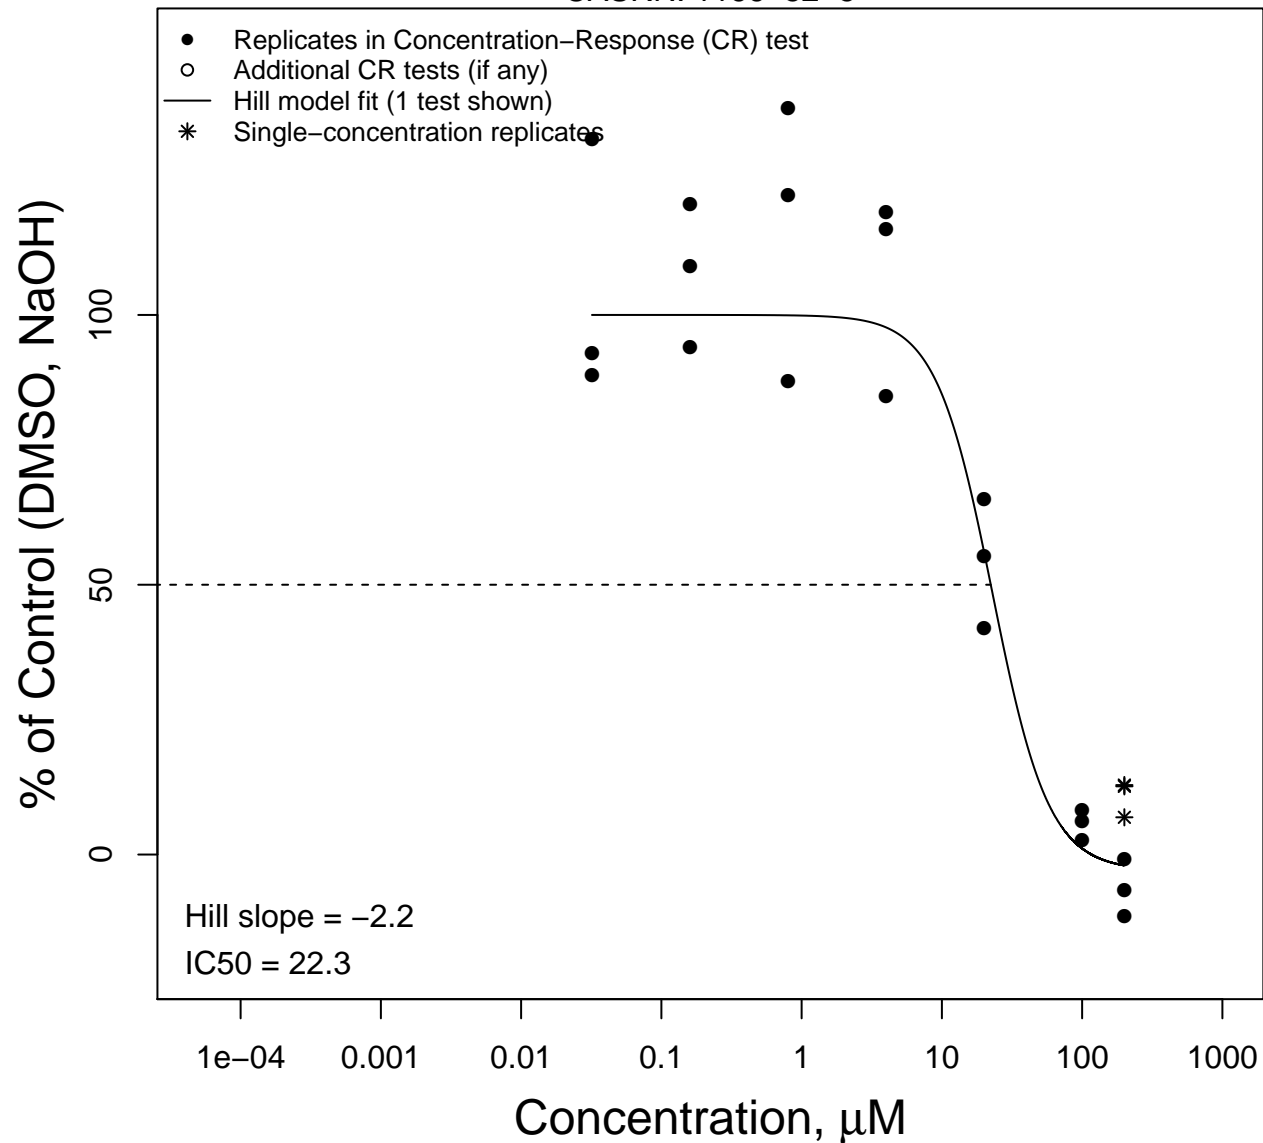



# Bis(2-ethylhexyl) phosphate

CASRN: 298-07-7

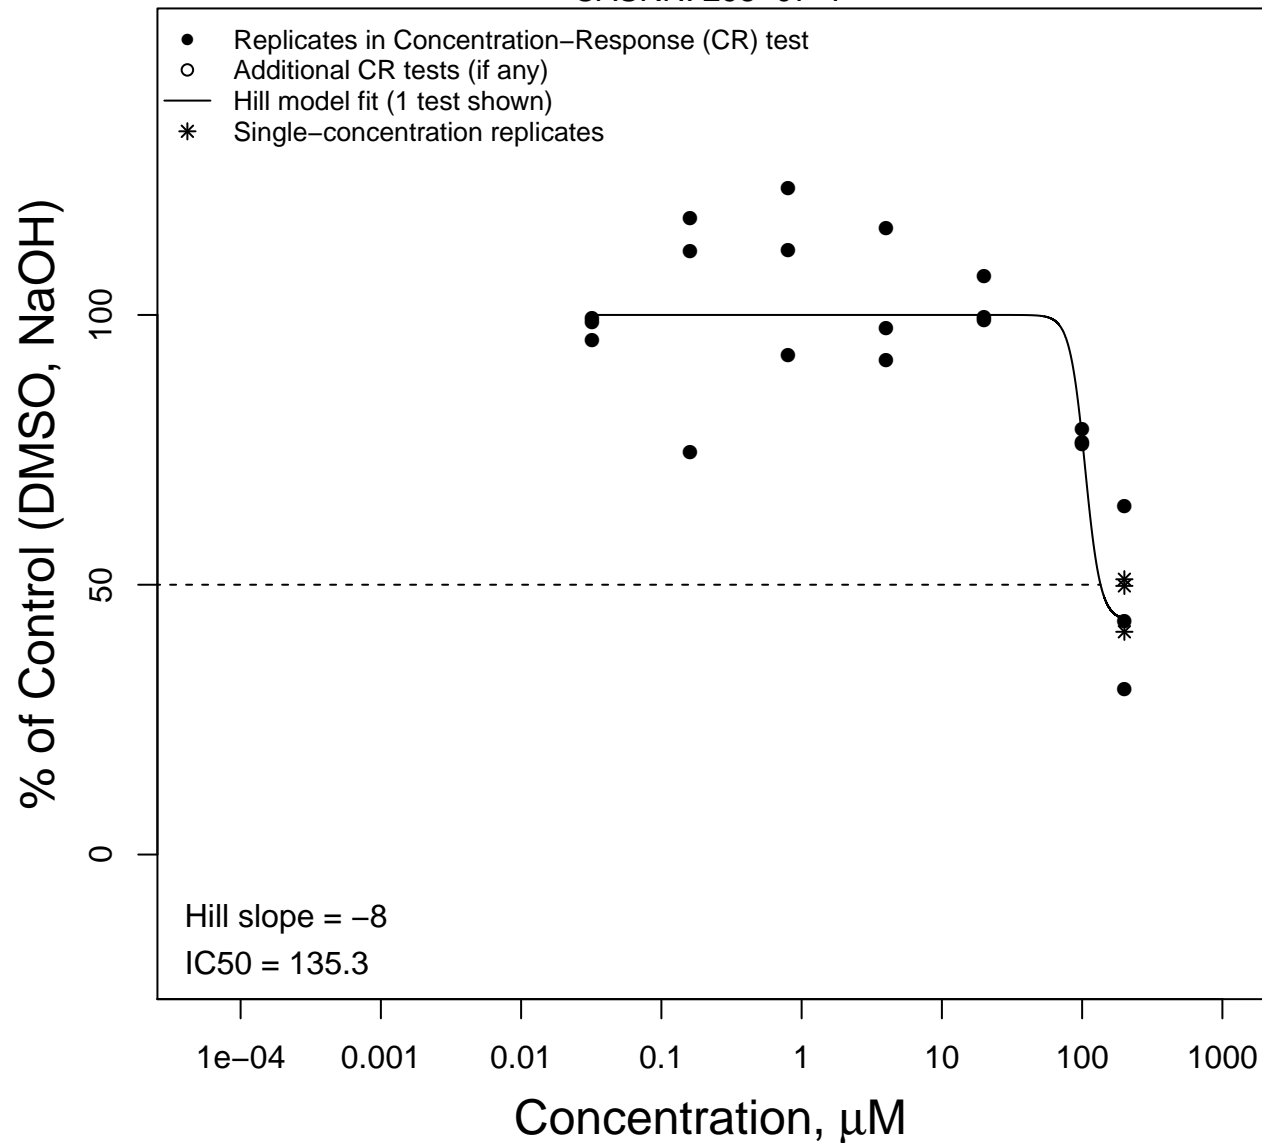

# Oleic acid

CASRN: 112-80-1

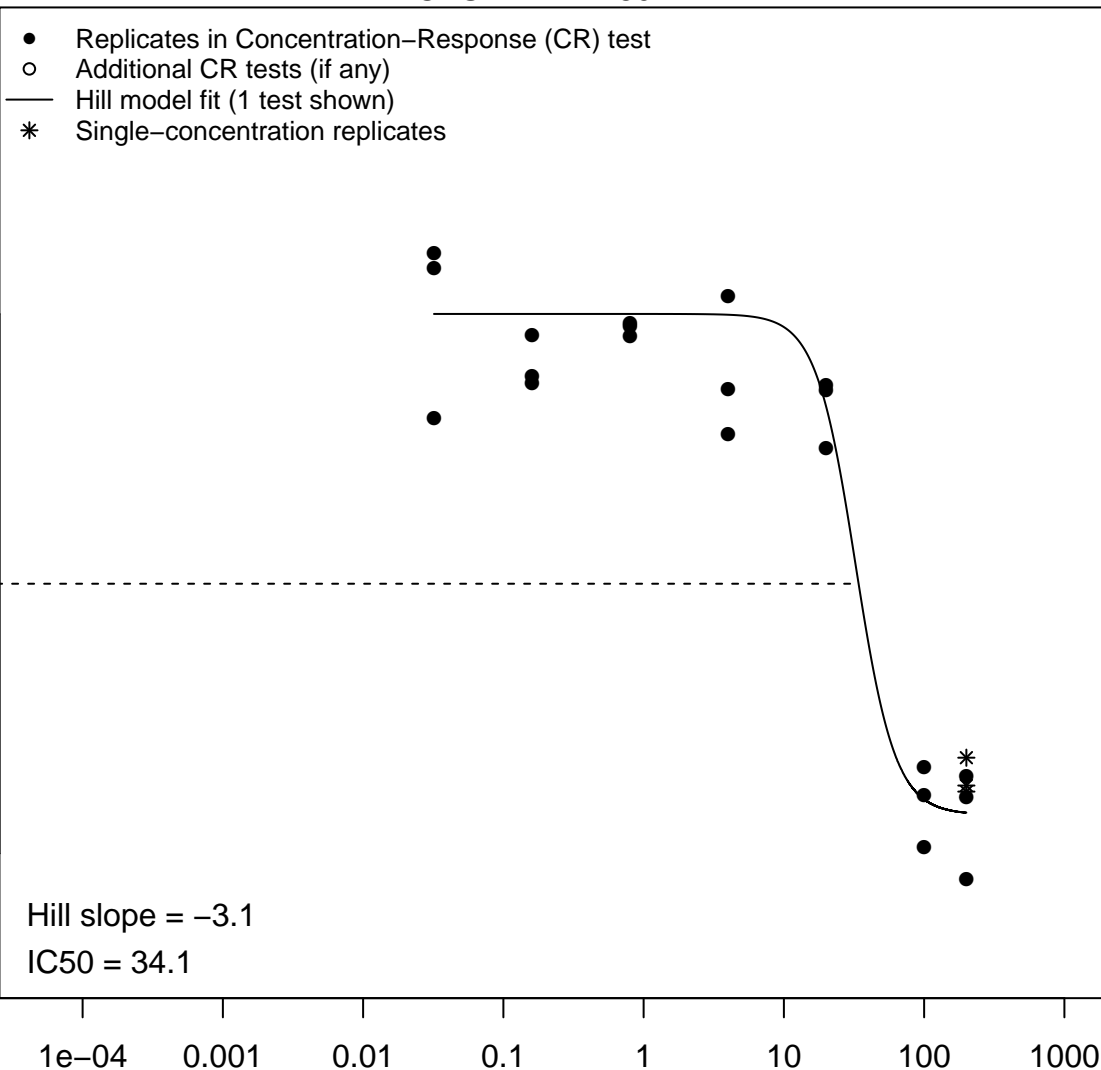

Concentration, µM

# Z-Tetrachlorvinphos

CASRN: 22248-79-9

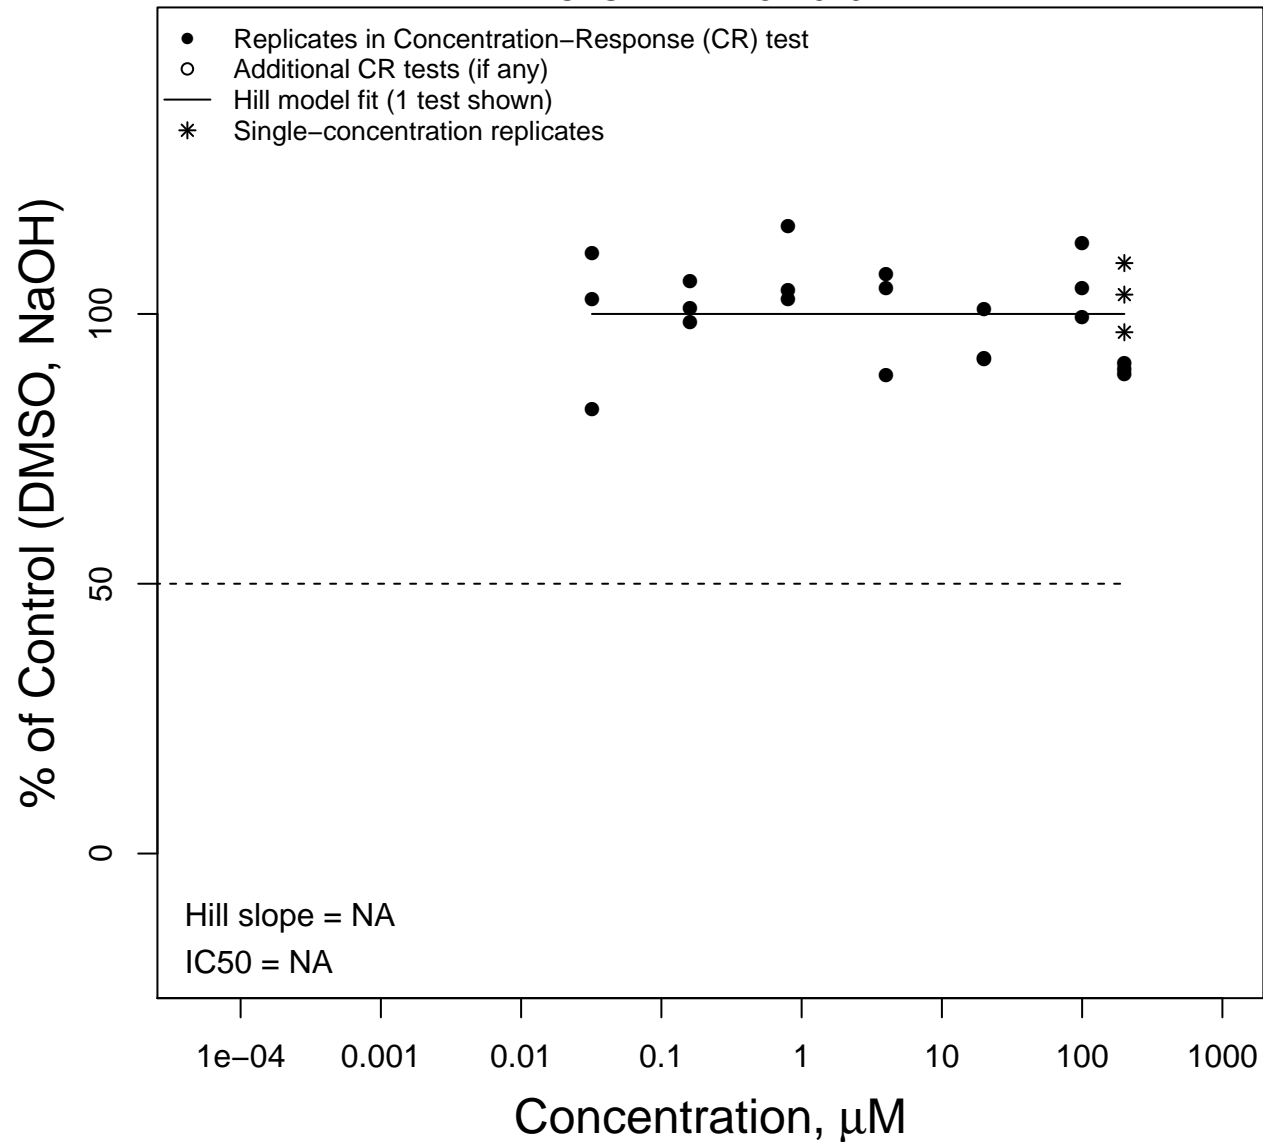

# Benzyl-C8-18-alkyldimethylammonium chlorides

CASRN: 63449-41-2

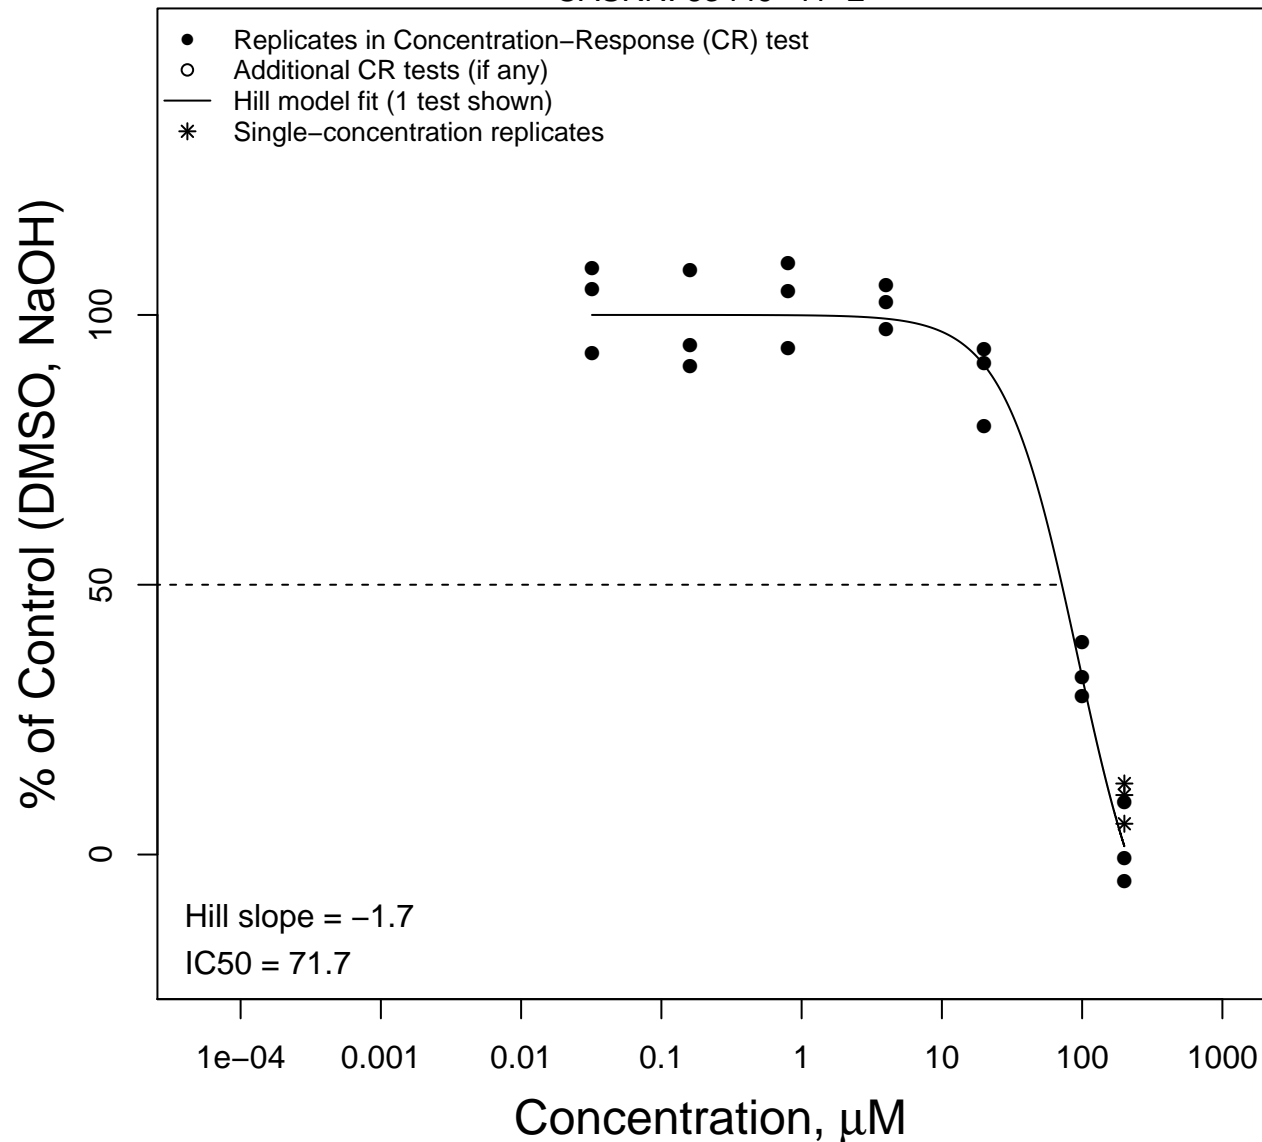



# Sodium lauryl polyoxyethylene ether sulfate

CASRN: 9004-82-4

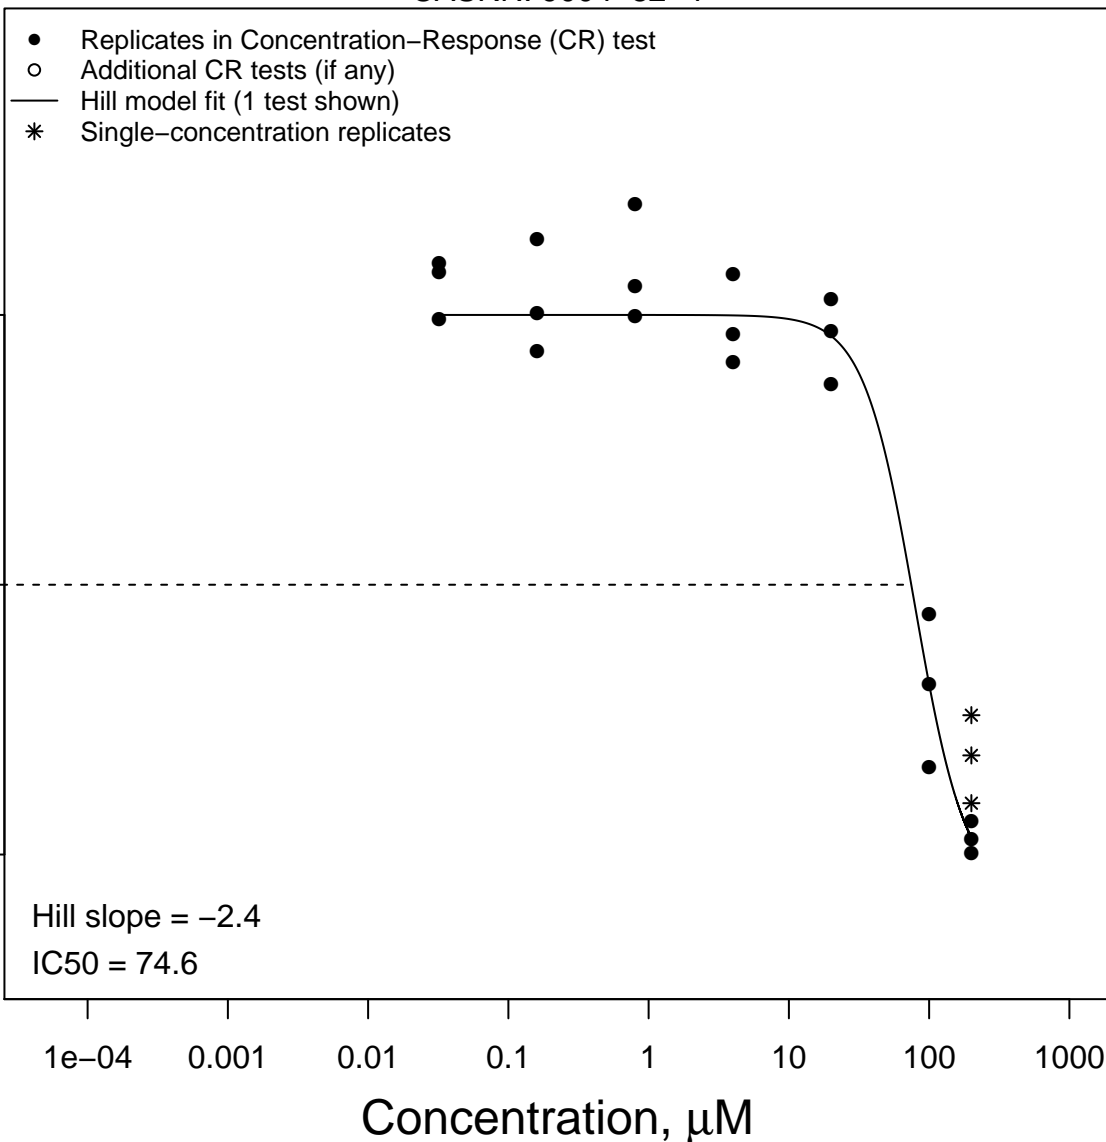

# Hexadecanoic acid

CASRN: 57-10-3

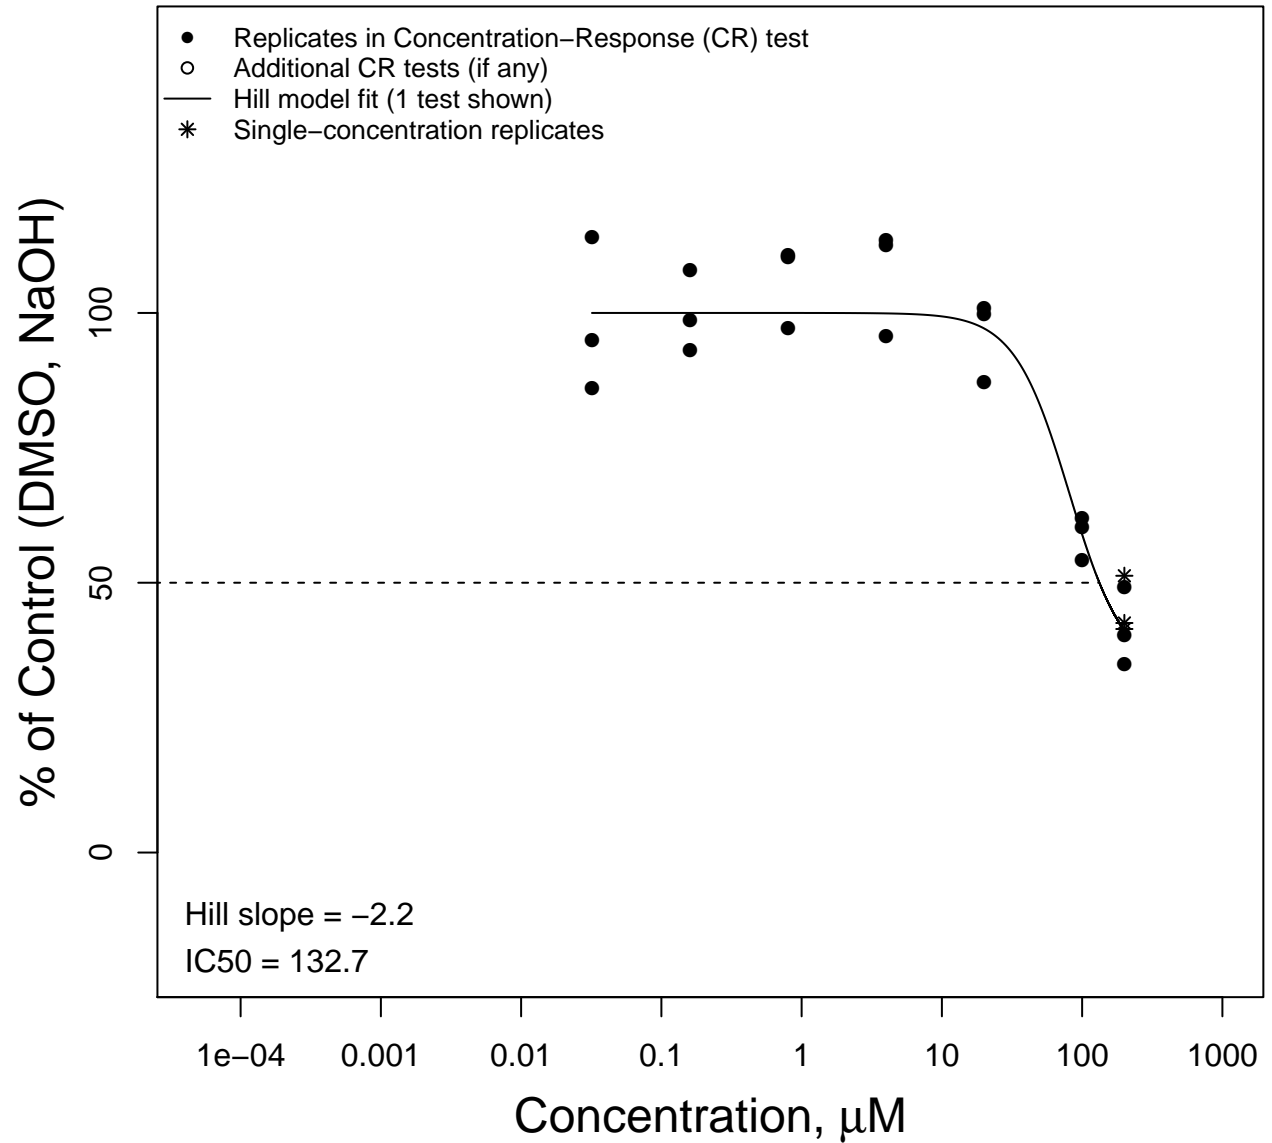

# Isooctadecanoic acid

CASRN: 30399-84-9

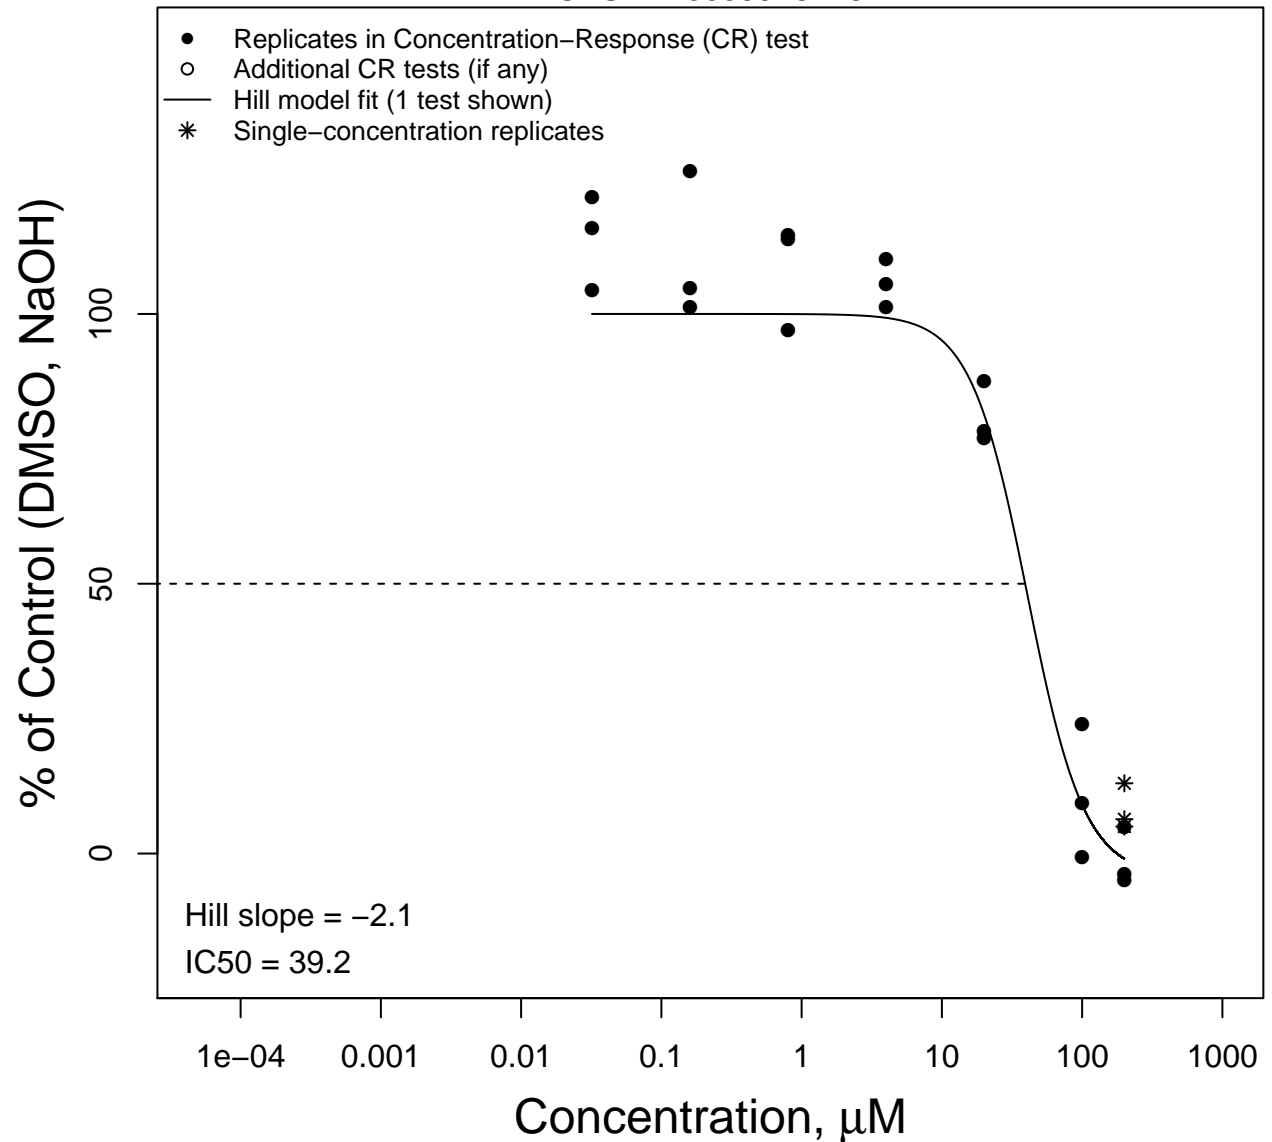

# Linoleic acid

CASRN: 60-33-3

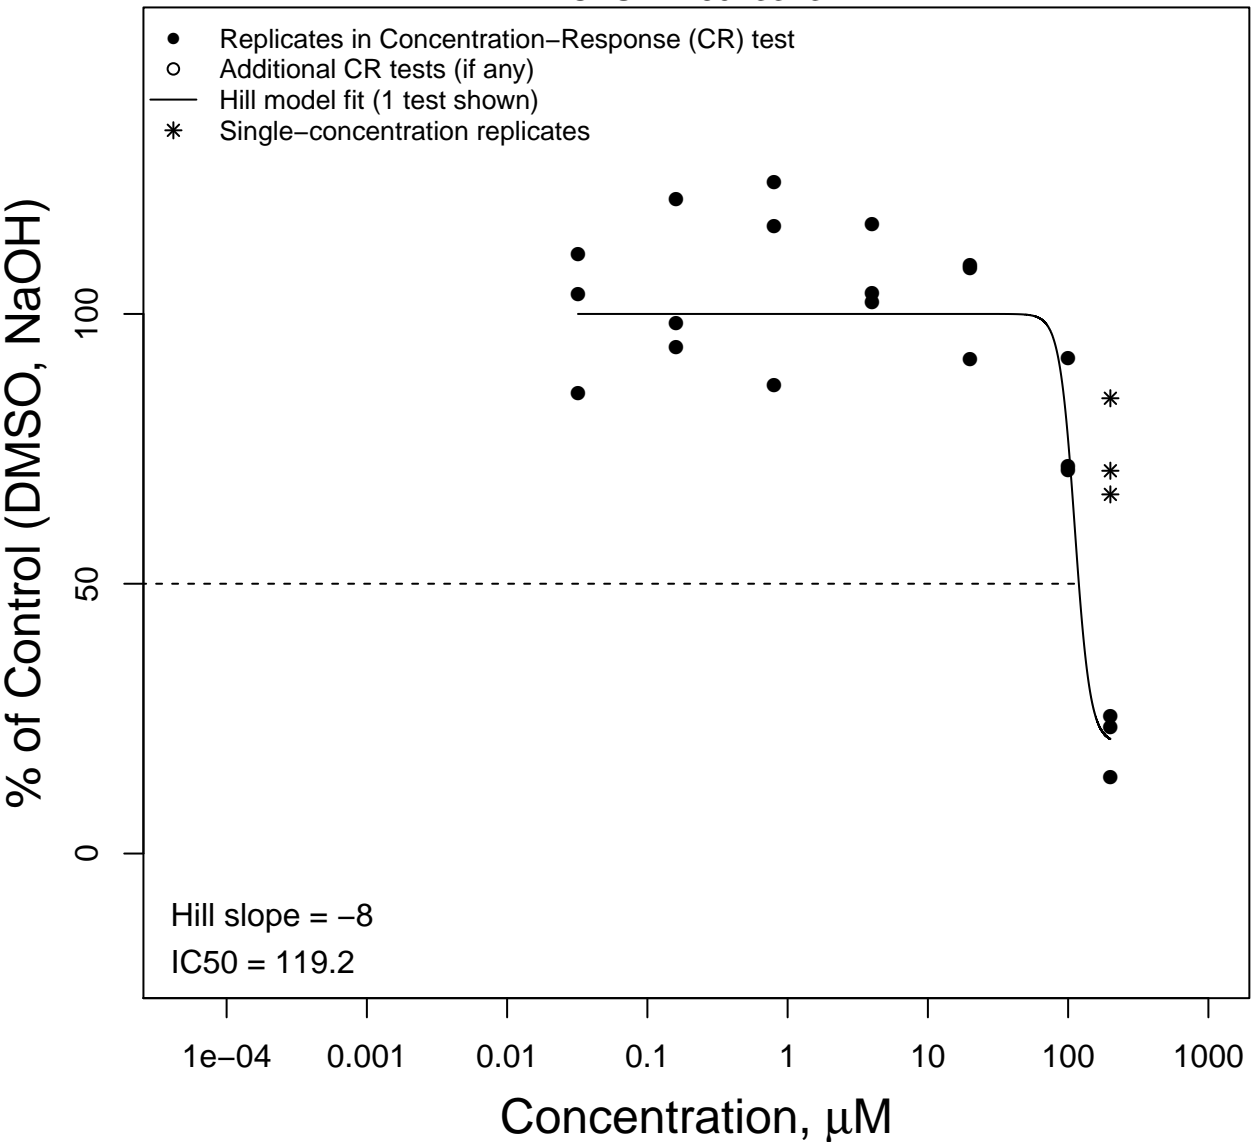

# Methyltrioctylammonium chloride

CASRN: 5137-55-3

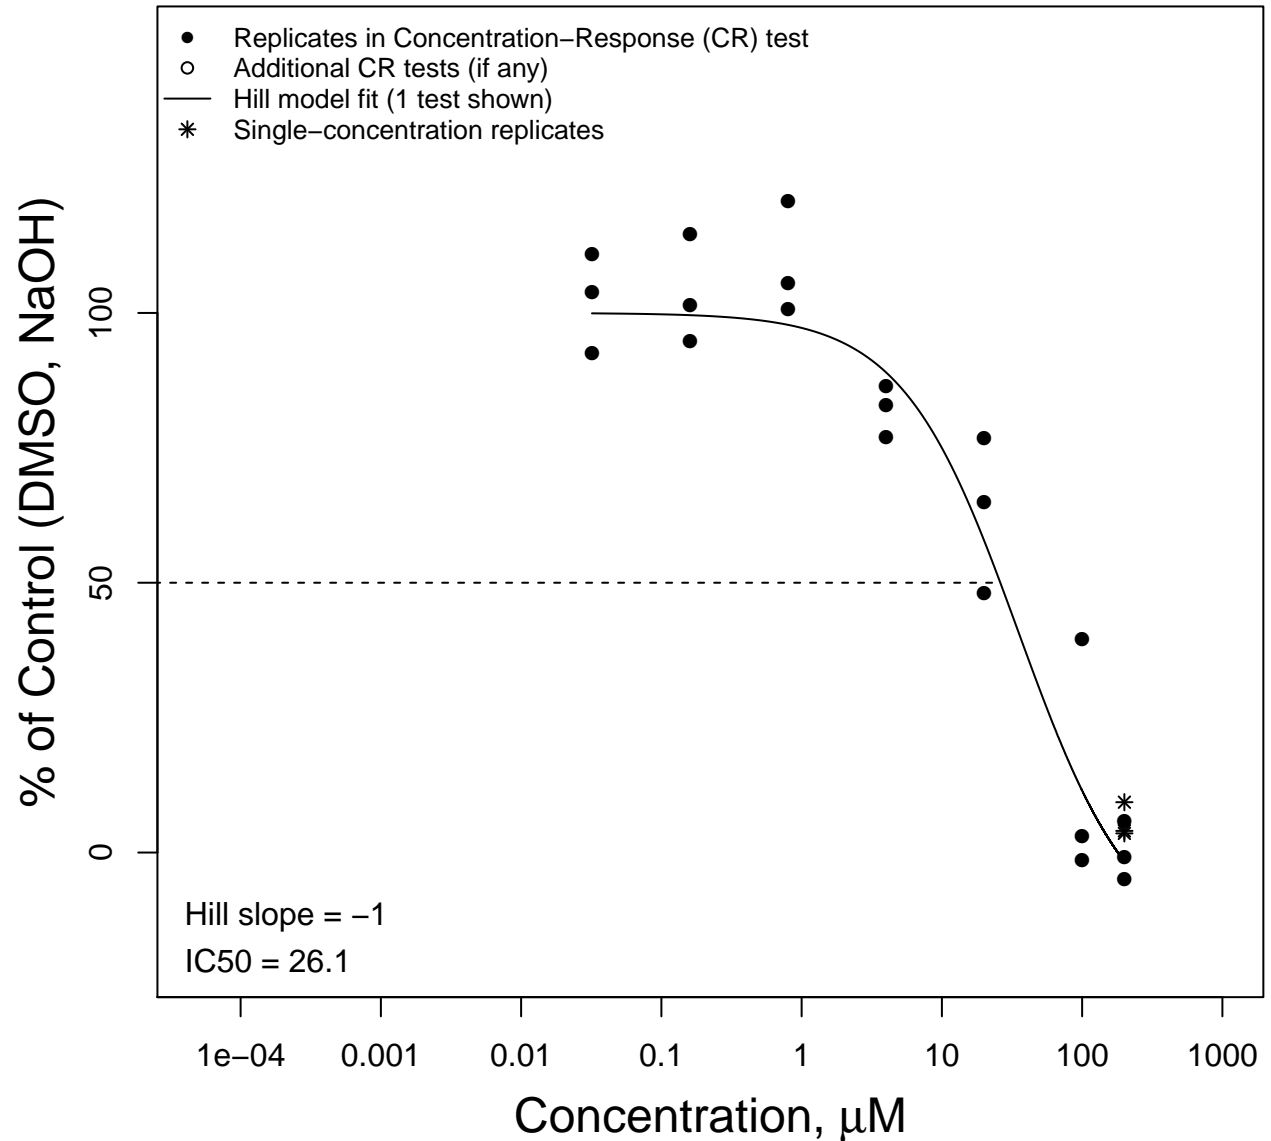

# 1,4-Diaminoanthraquinone

CASRN: 128-95-0

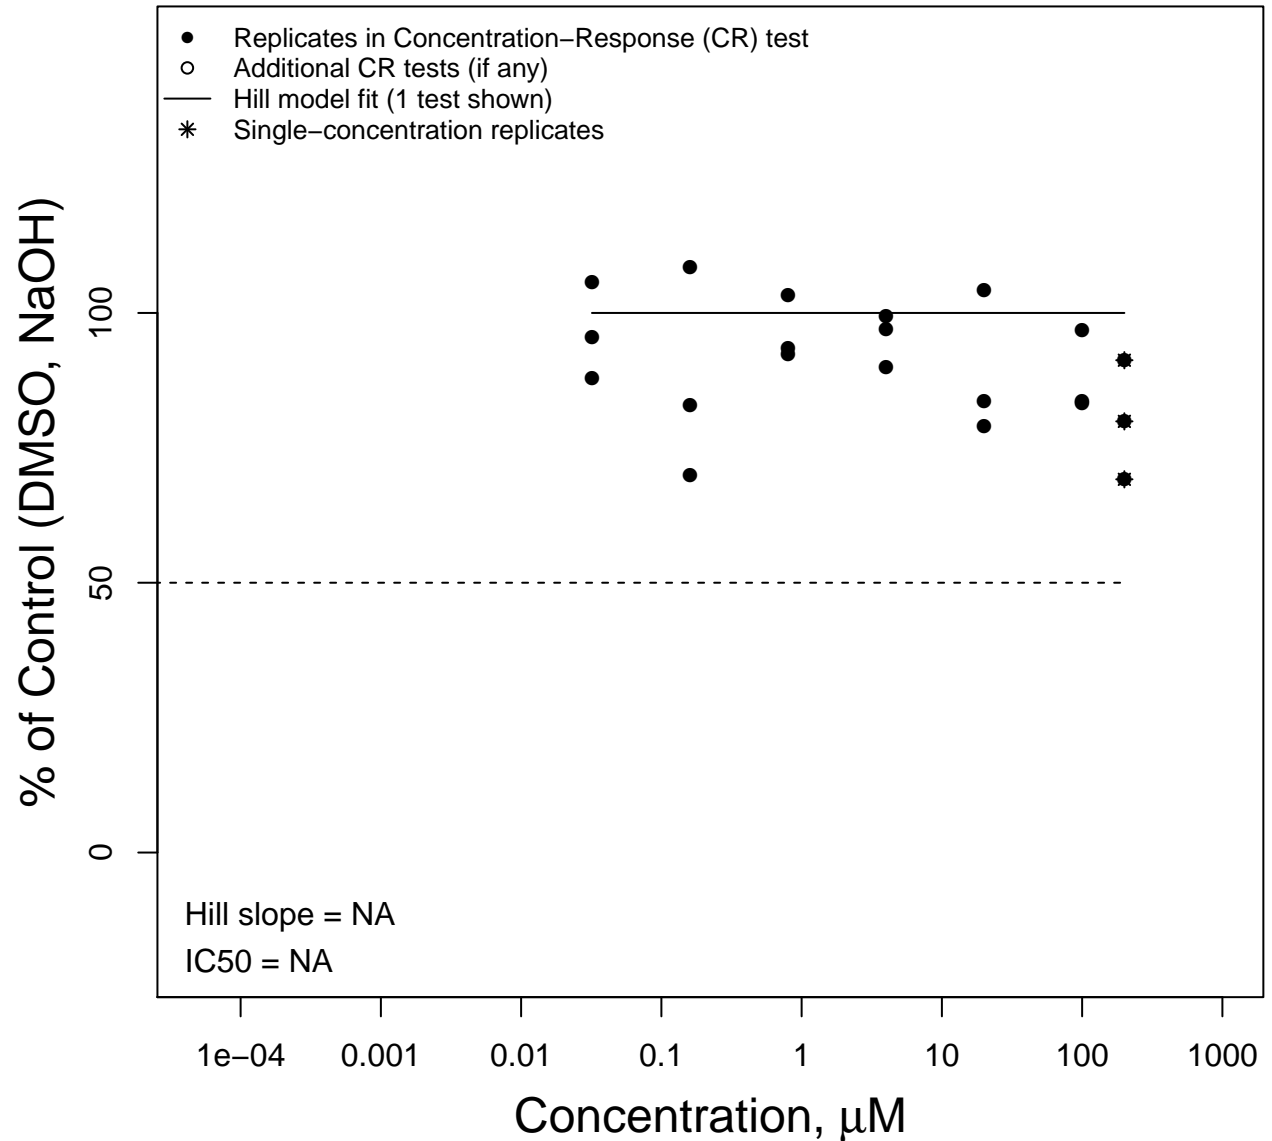

# 2,2',6,6'-Tetrachlorobisphenol A

CASRN: 79-95-8

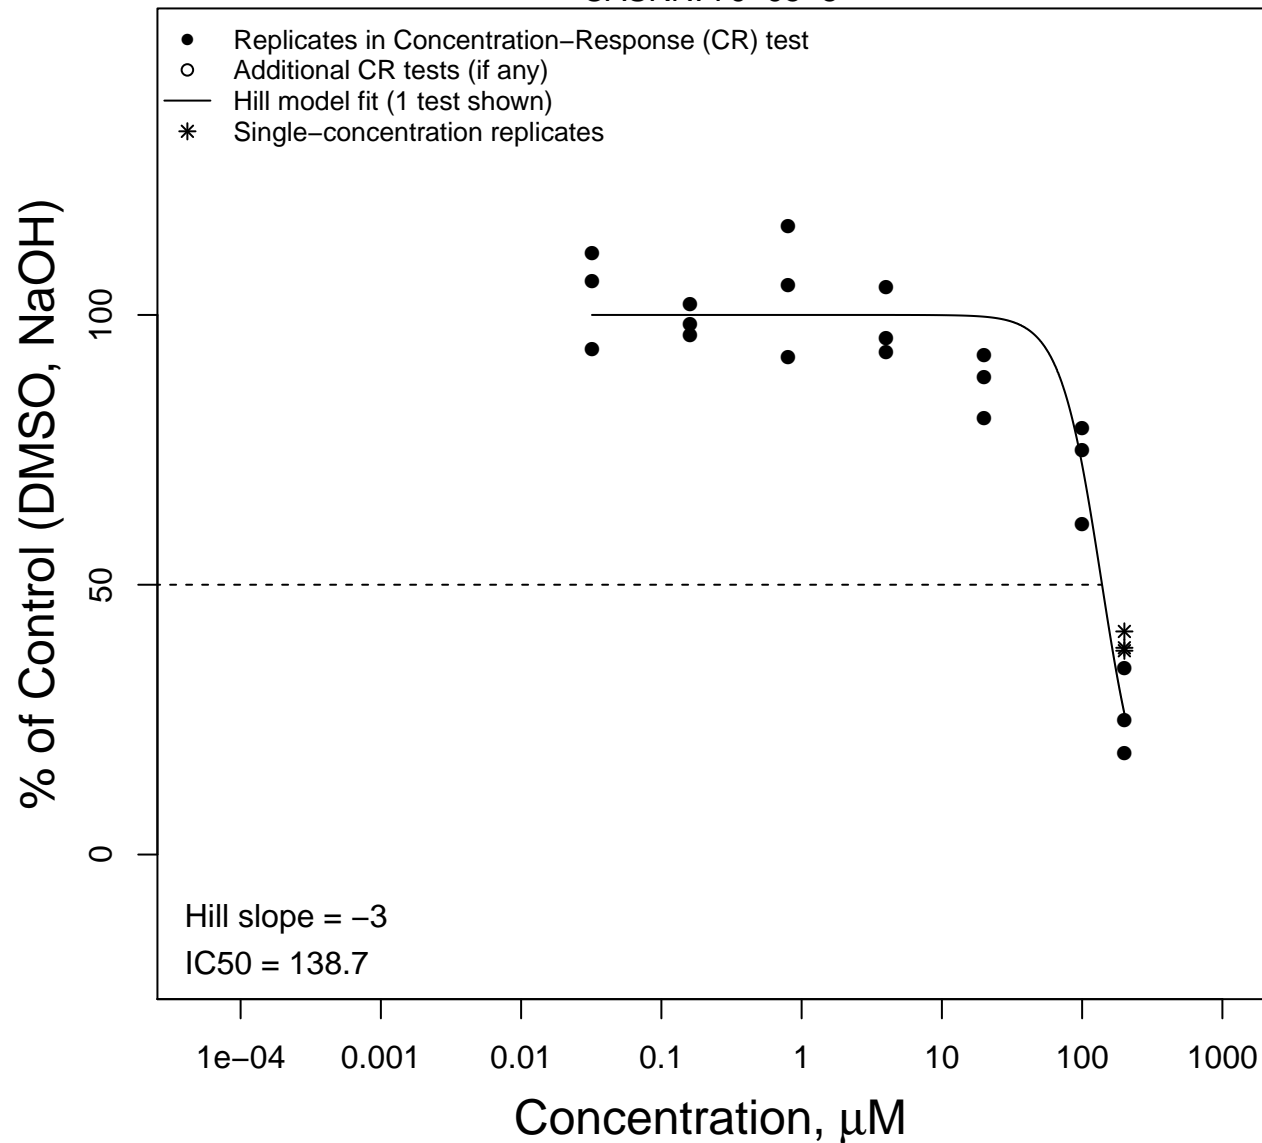

# Acid Red 337

CASRN: 67786-14-5

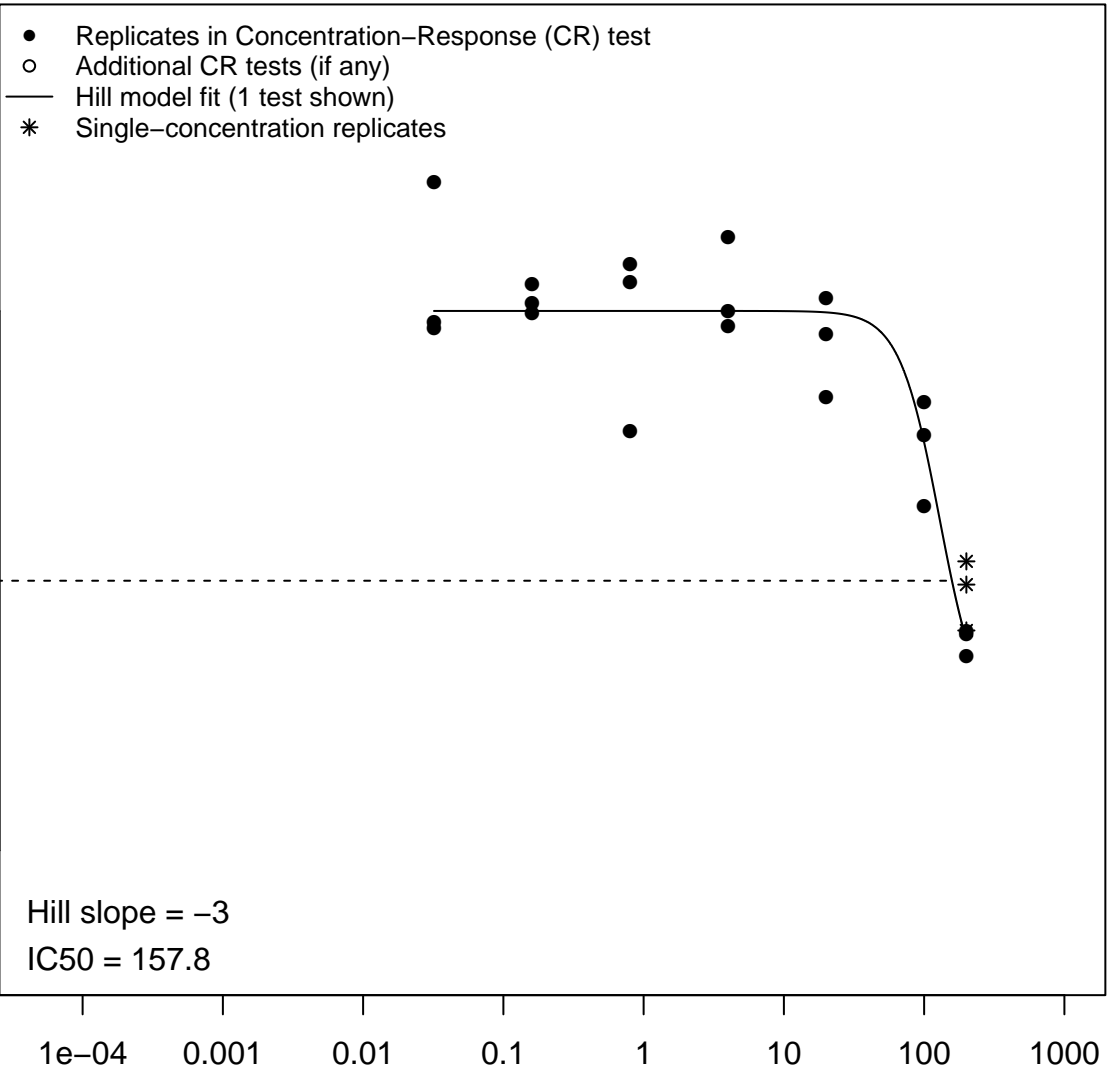

% of Control (DMSO, NaOH)

Concentration, µM



# Glyceryl monooleate

CASRN: 25496-72-4

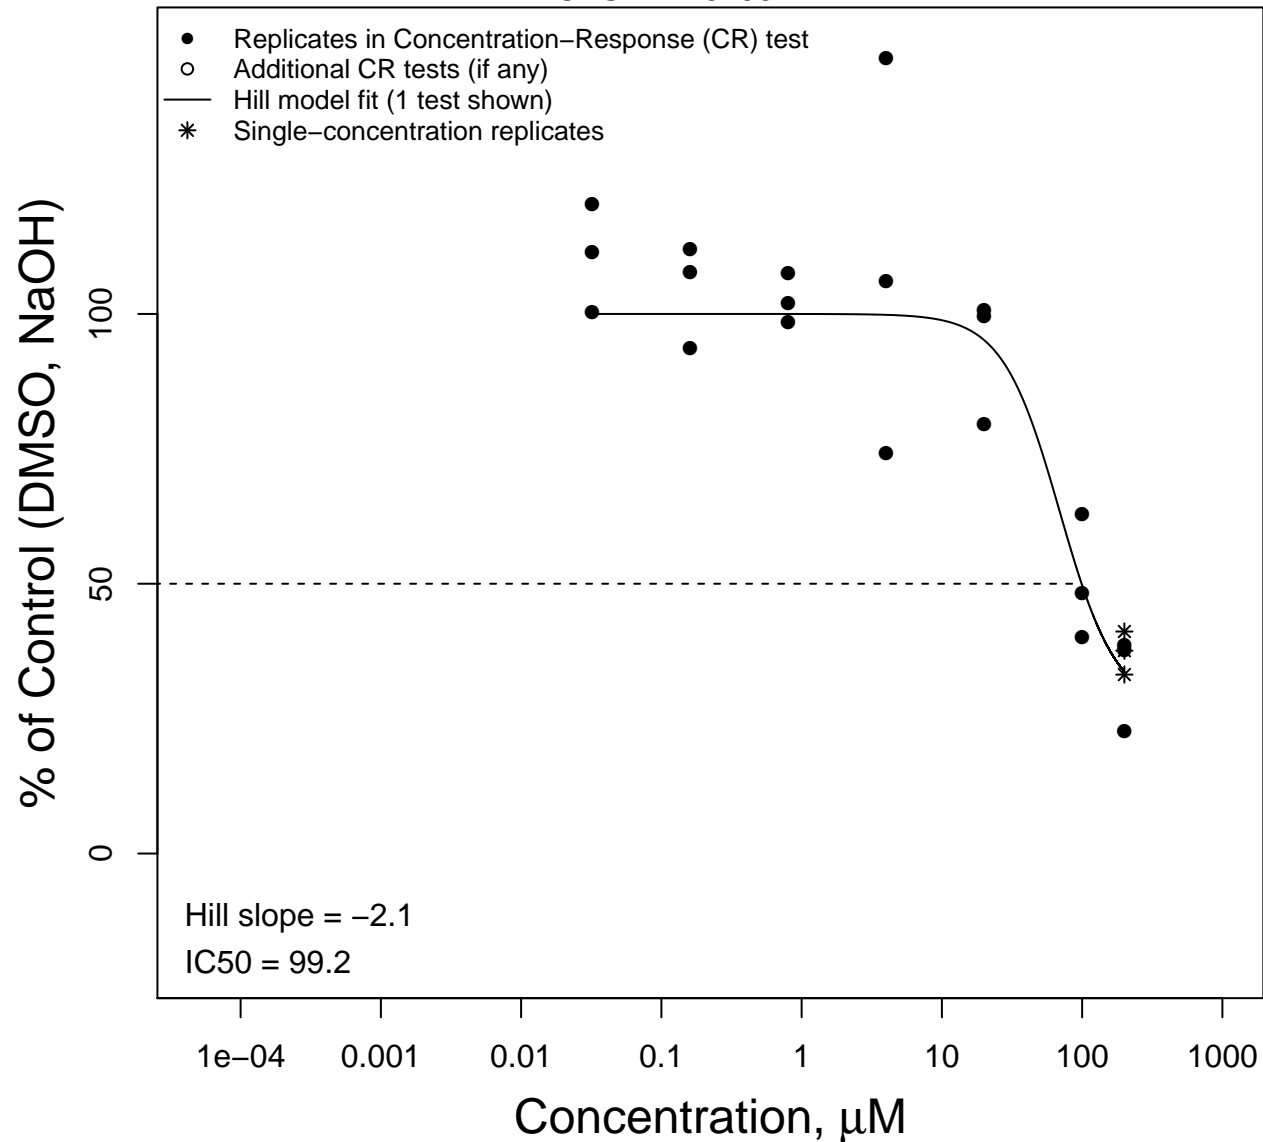

# 2-(8-Heptadecenyl)-2-imidazoline-1-ethanol

CASRN: 95-38-5

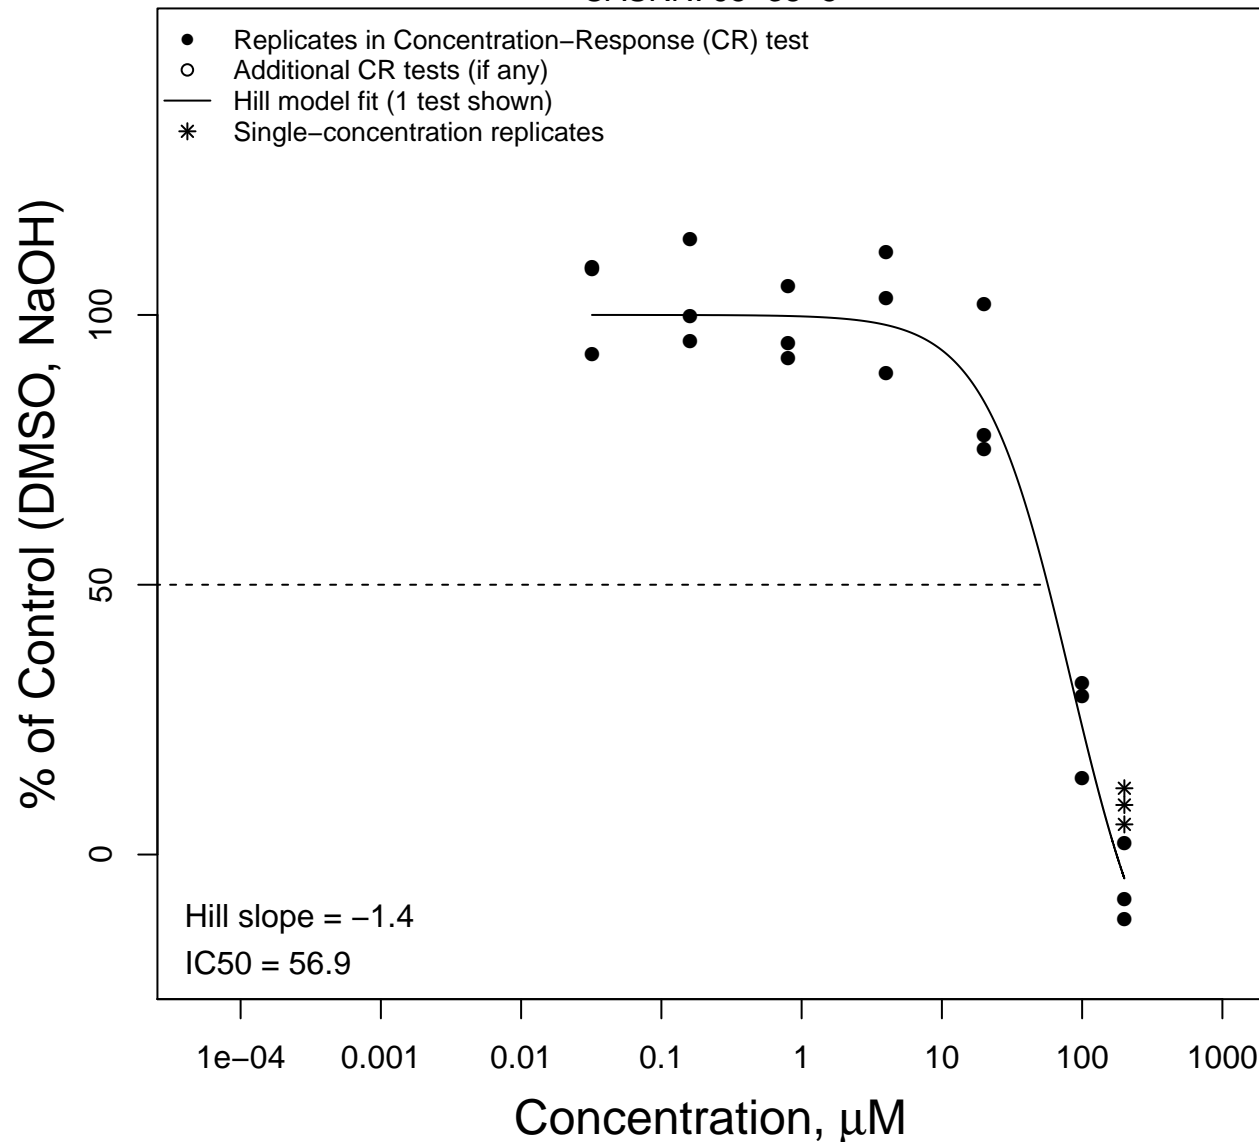

# FD&C Green No. 3

CASRN: 2353-45-9

- Replicates in Concentration-Response (CR) test
- Additional CR tests (if any)
- Hill model fit (1 test shown)
- \* Single-concentration replicates

% of Control (DMSO, NaOH)

100  
50  
0

1e-04

0.001

0.01

0.1

1

10

100

1000

Concentration,  $\mu\text{M}$

Hill slope = -4.1

IC50 = 74.4

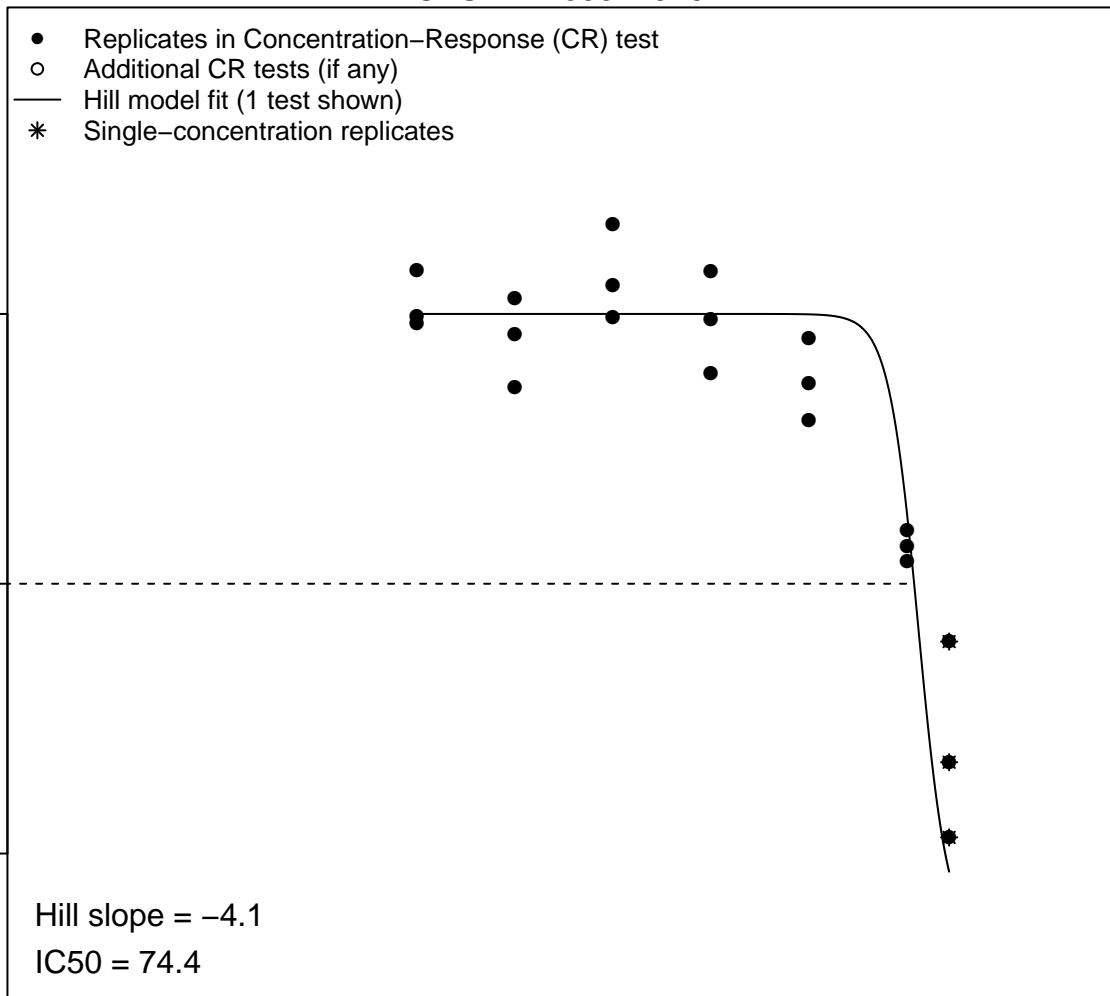

# Morin hydrate

CASRN: 654055-01-3

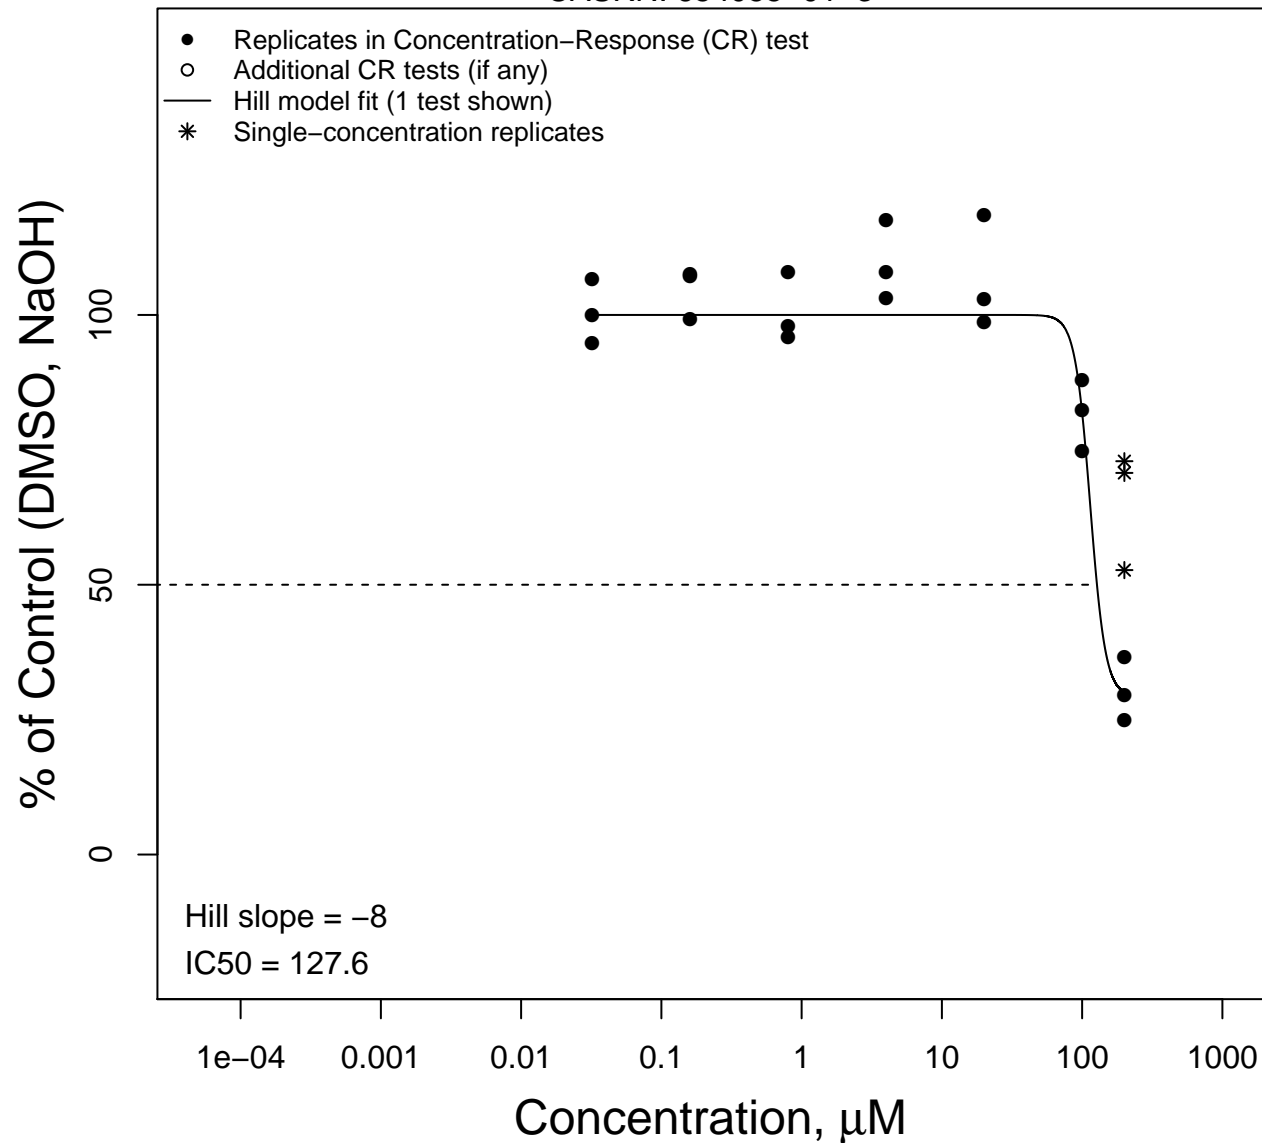

# Dinocap

CASRN: 39300-45-3

- Replicates in Concentration-Response (CR) test
- Additional CR tests (if any)
- Hill model fit (1 test shown)
- \* Single-concentration replicates

% of Control (DMSO, NaOH)

100

50

0

Hill slope = -8

IC50 = 23.8

1e-04

0.001

0.01

0.1

1

10

100

1000

Concentration,  $\mu\text{M}$

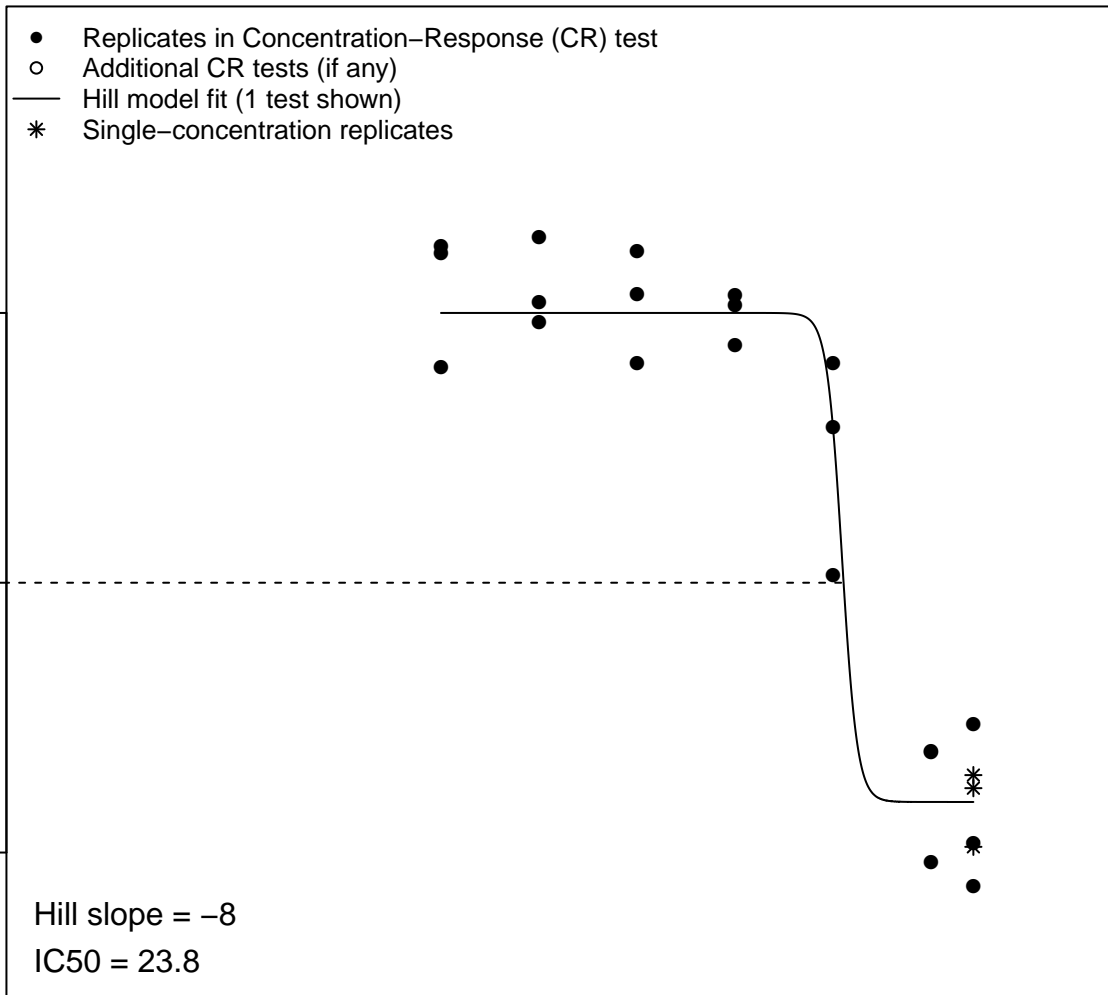

# Heptylparaben

CASRN: 1085-12-7

- Replicates in Concentration-Response (CR) test
- Additional CR tests (if any)
- Hill model fit (1 test shown)
- \* Single-concentration replicates

% of Control (DMSO, NaOH)

100

50

0

Hill slope = -1.2

IC50 = 45.8

1e-04

0.001

0.01

0.1

1

10

100

1000

Concentration,  $\mu\text{M}$

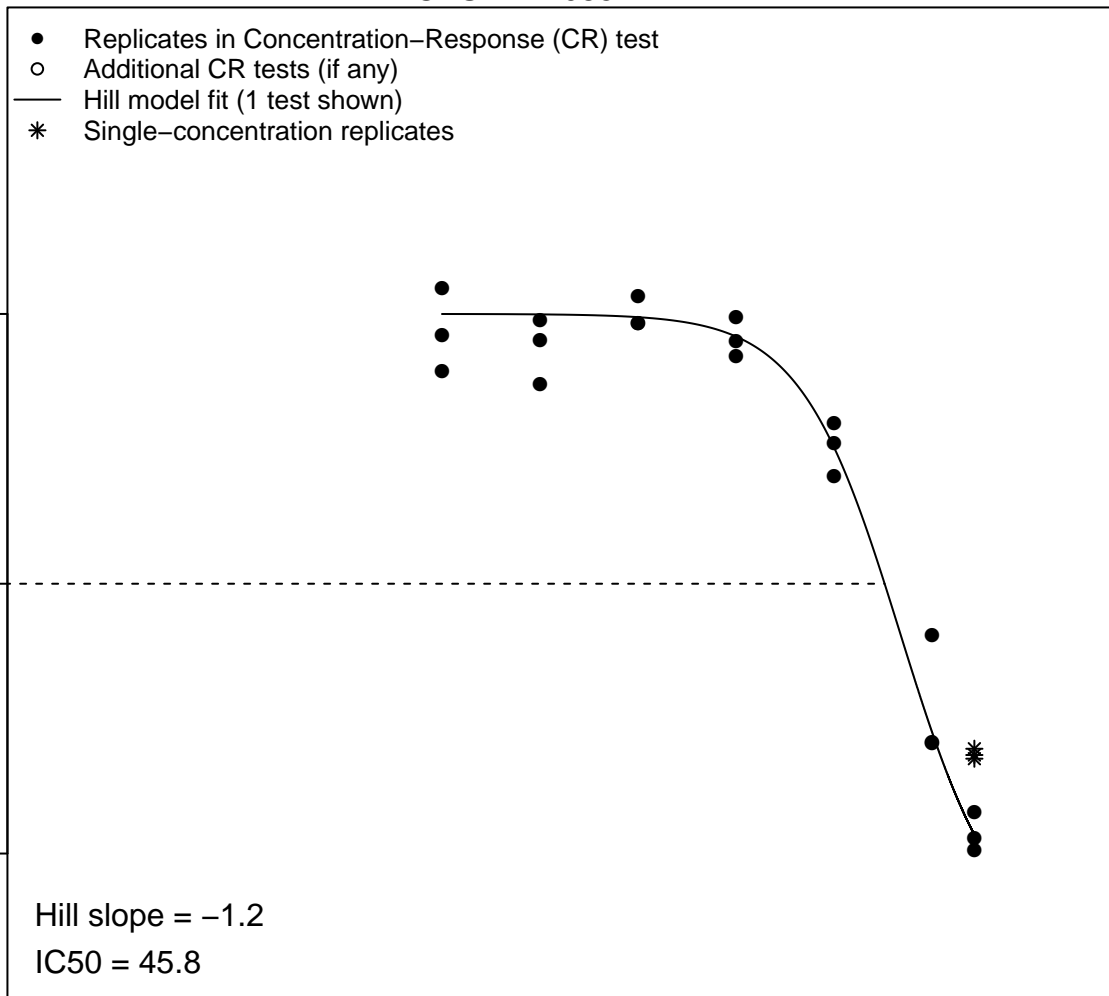

# Genistein

CASRN: 446-72-0

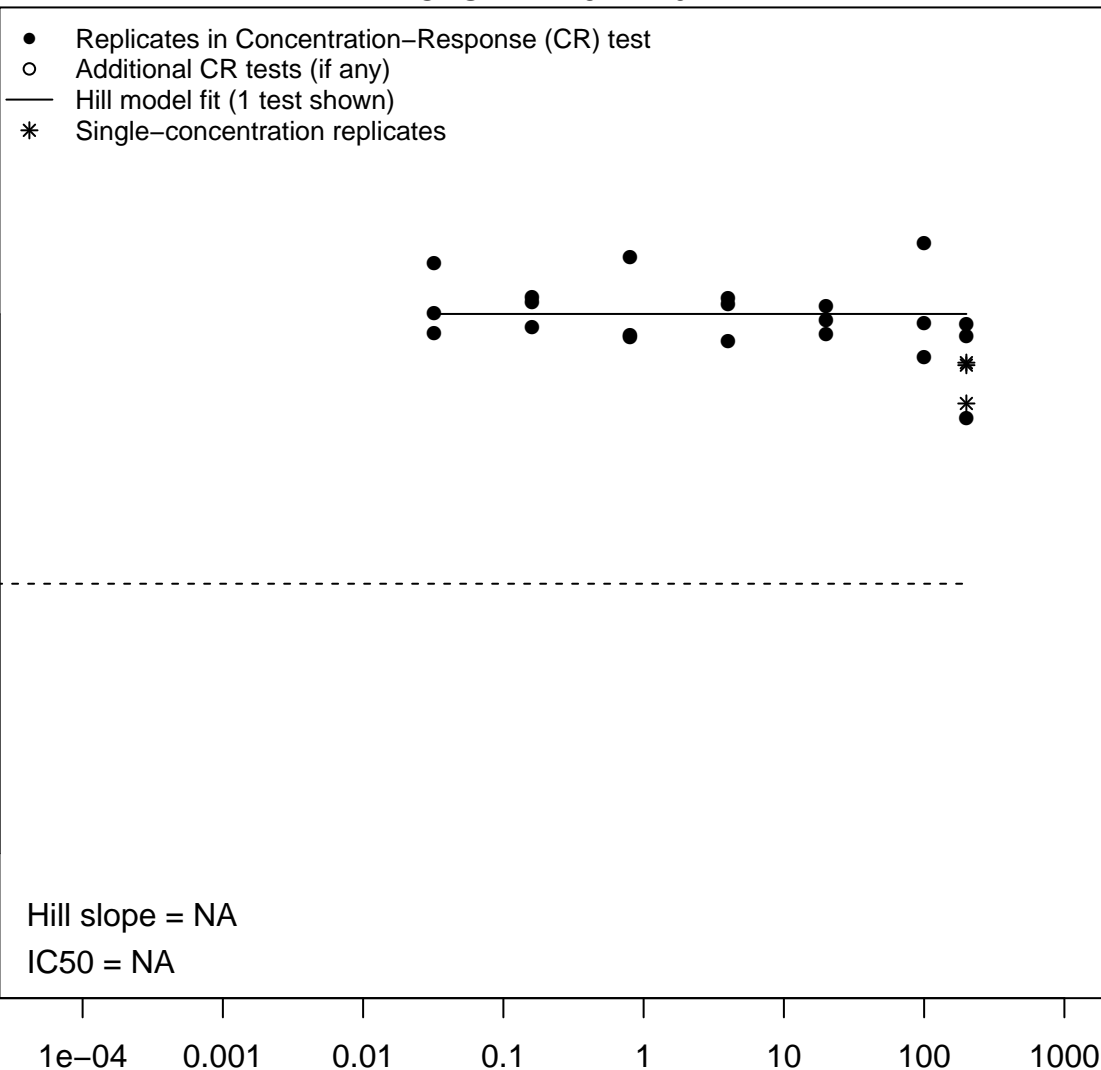

# Methylbenzethonium chloride

CASRN: 25155-18-4

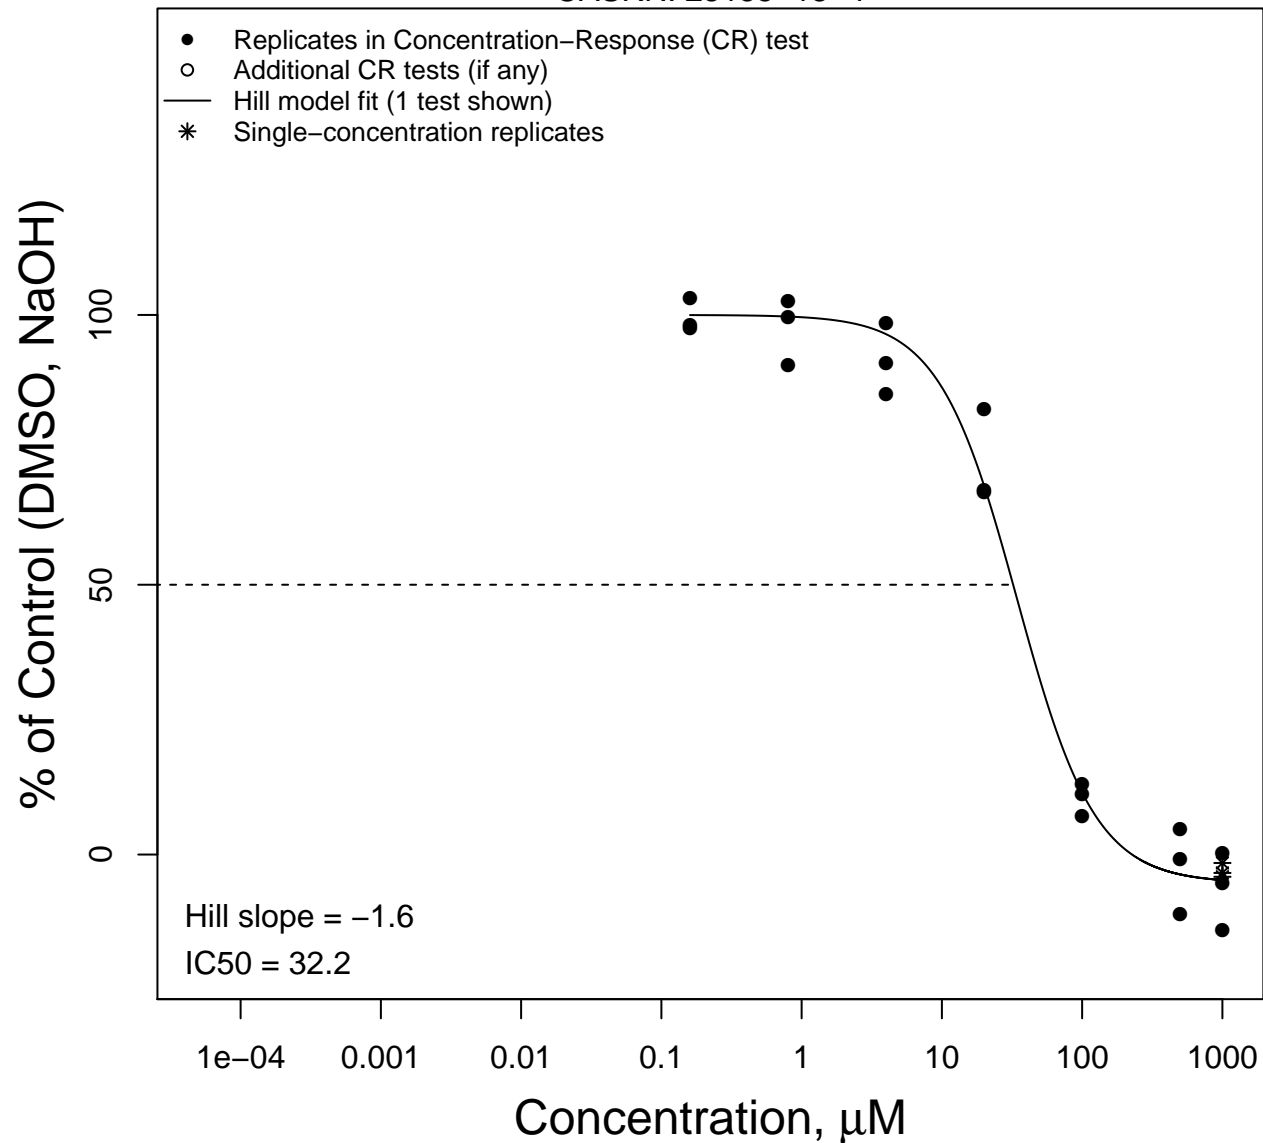



# 2,2'-Methylenebis(4-methyl-6-tert-butylphenol)

CASRN: 119-47-1

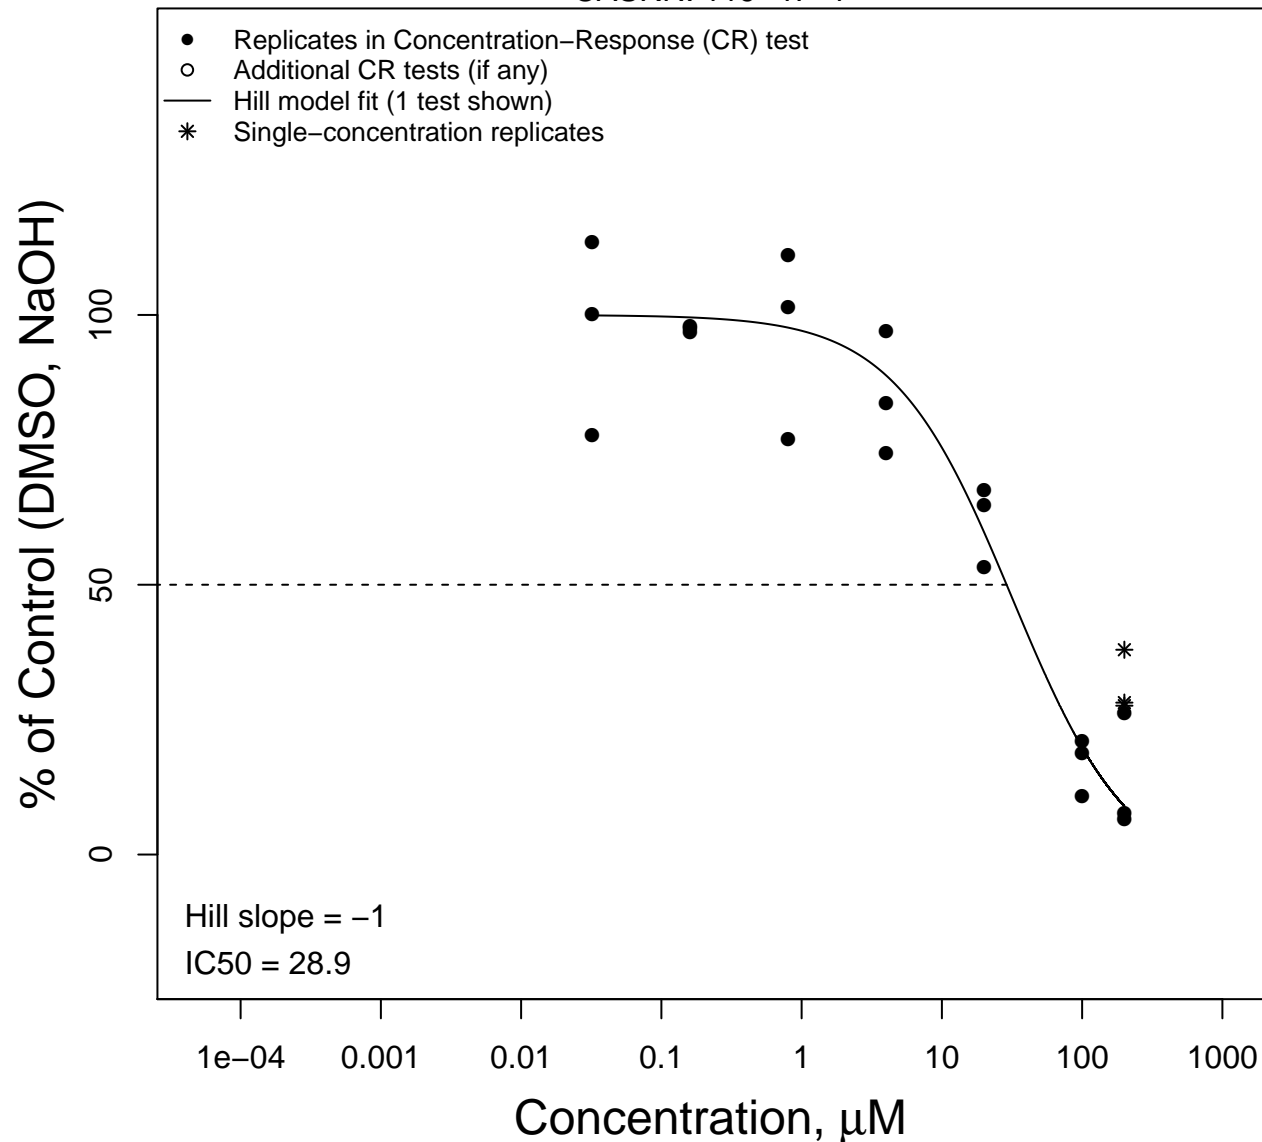

# Dodecyl sulfate triethanolamine

CASRN: 139-96-8

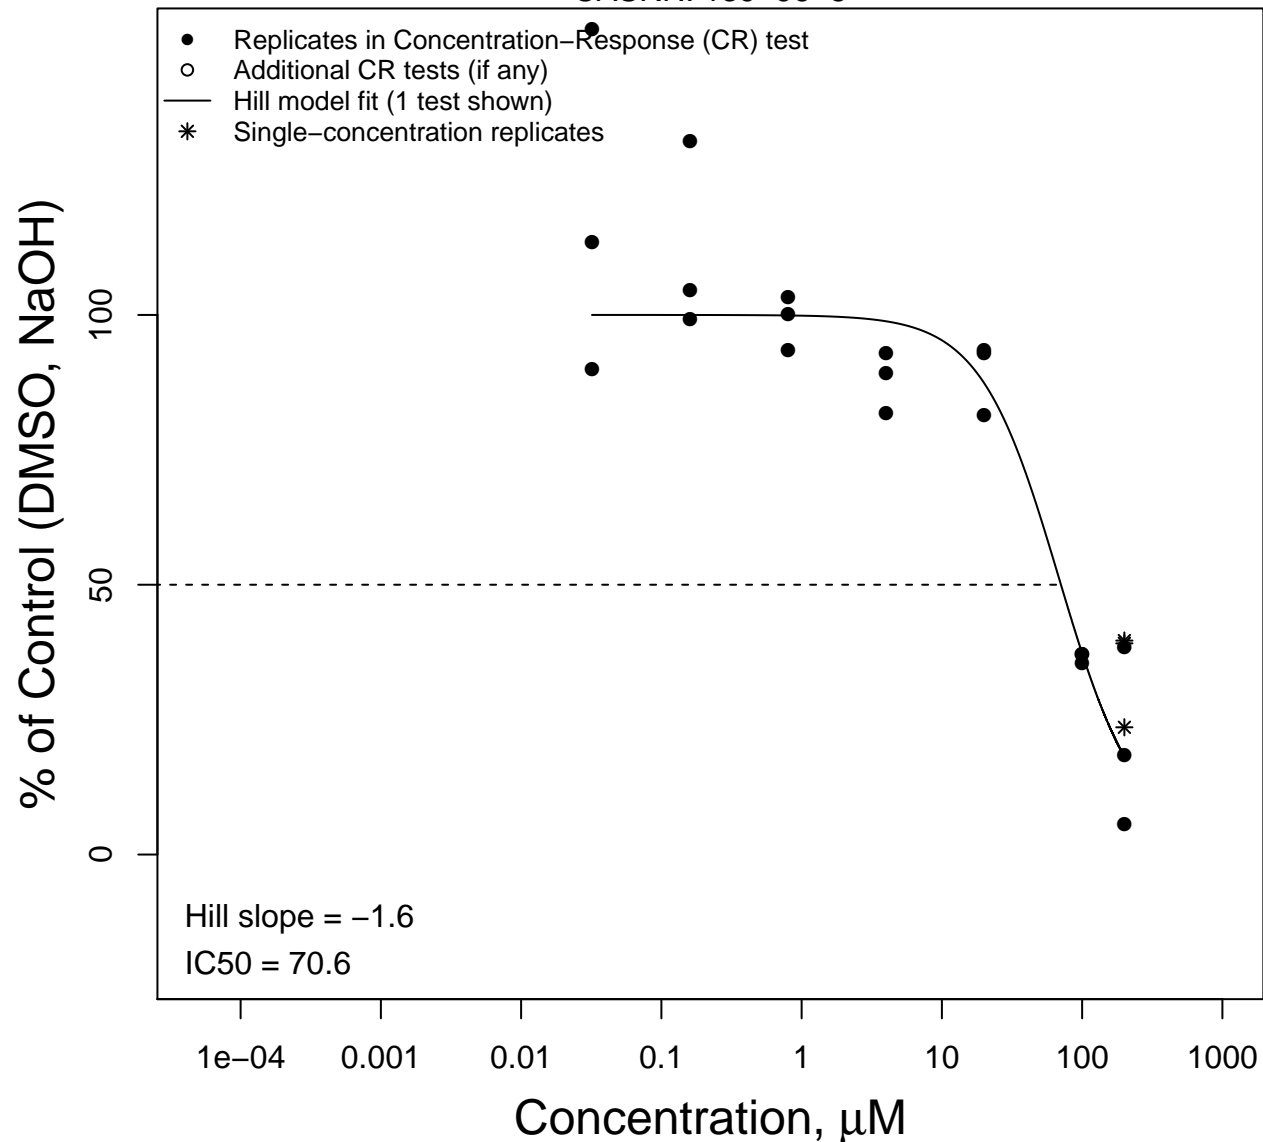

# 2-Ethylhexylparaben

CASRN: 5153-25-3

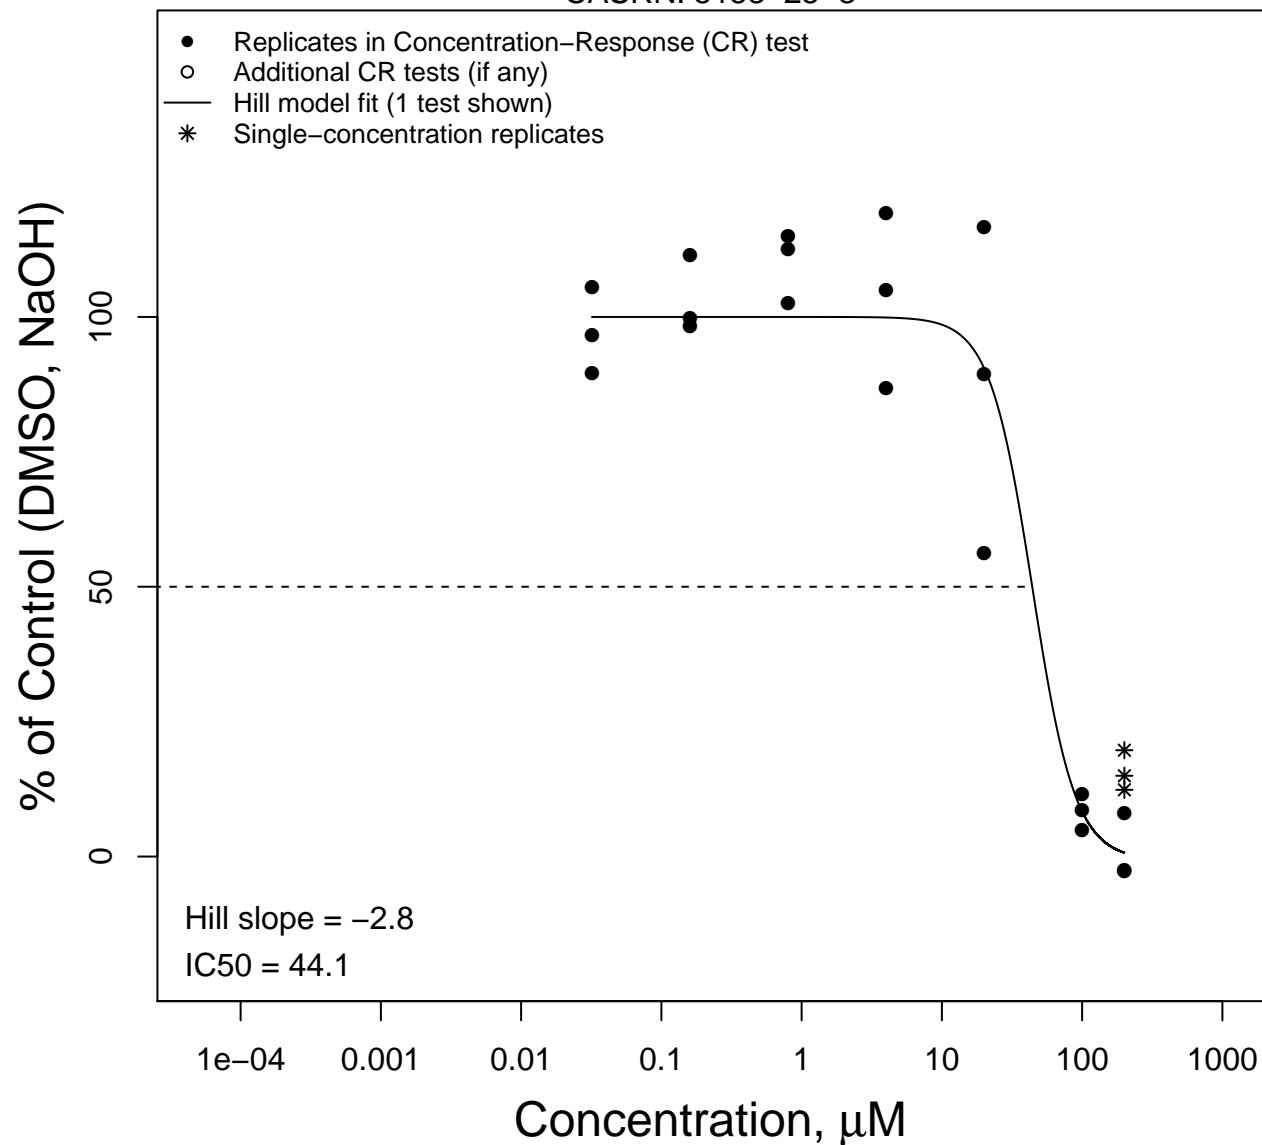

# Ascorbyl palmitate

CASRN: 137-66-6

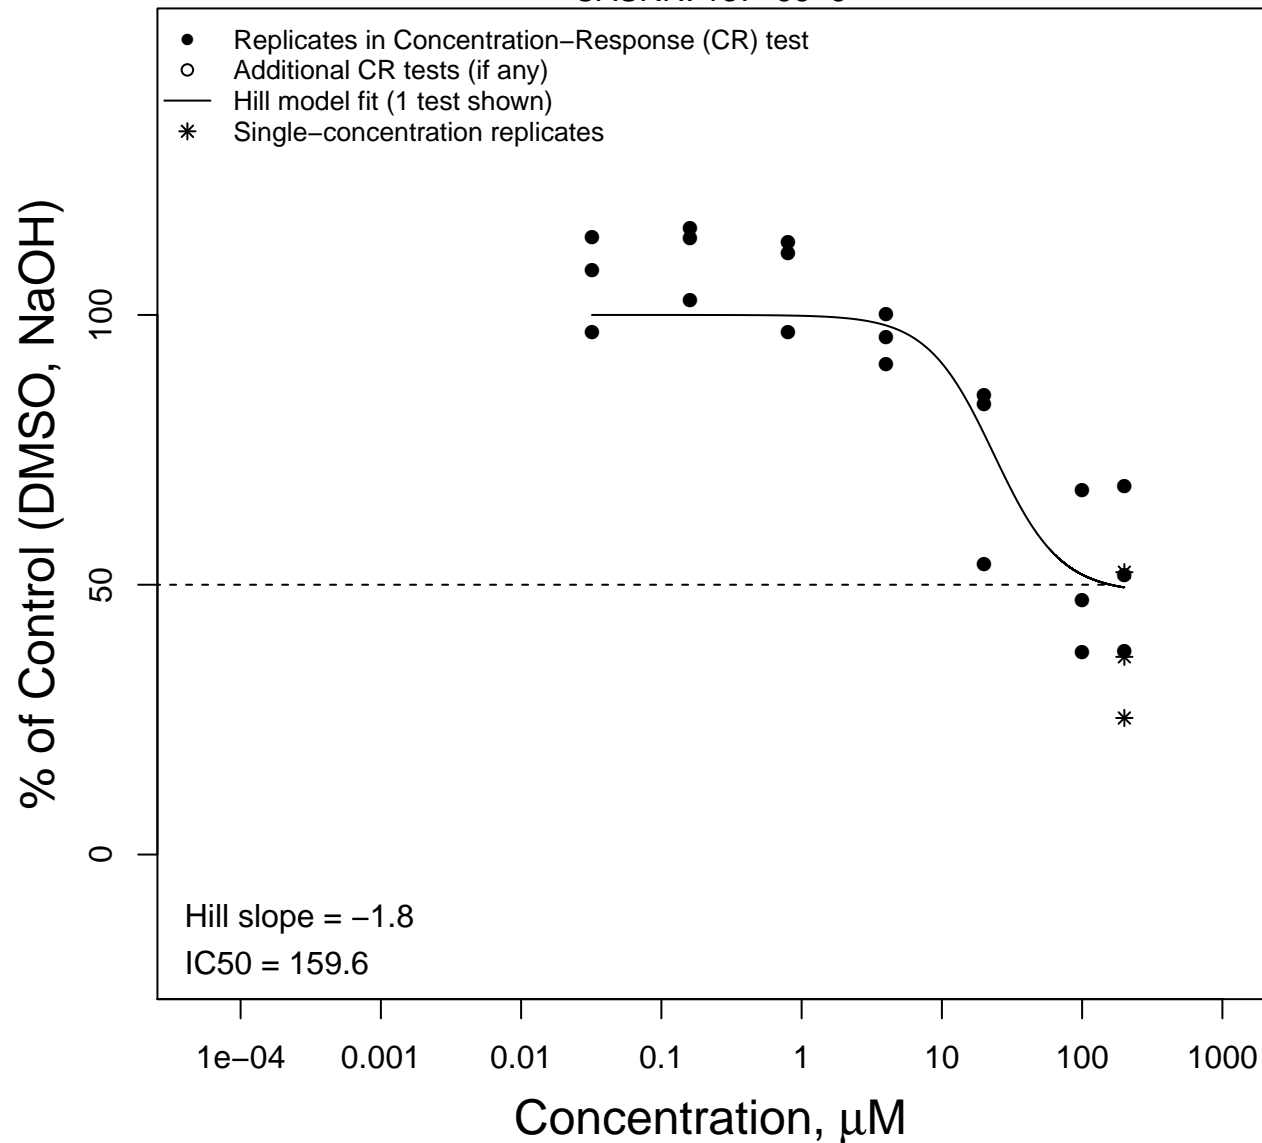

# 2-Chloro-N-phenylacetamide

CASRN: 587-65-5

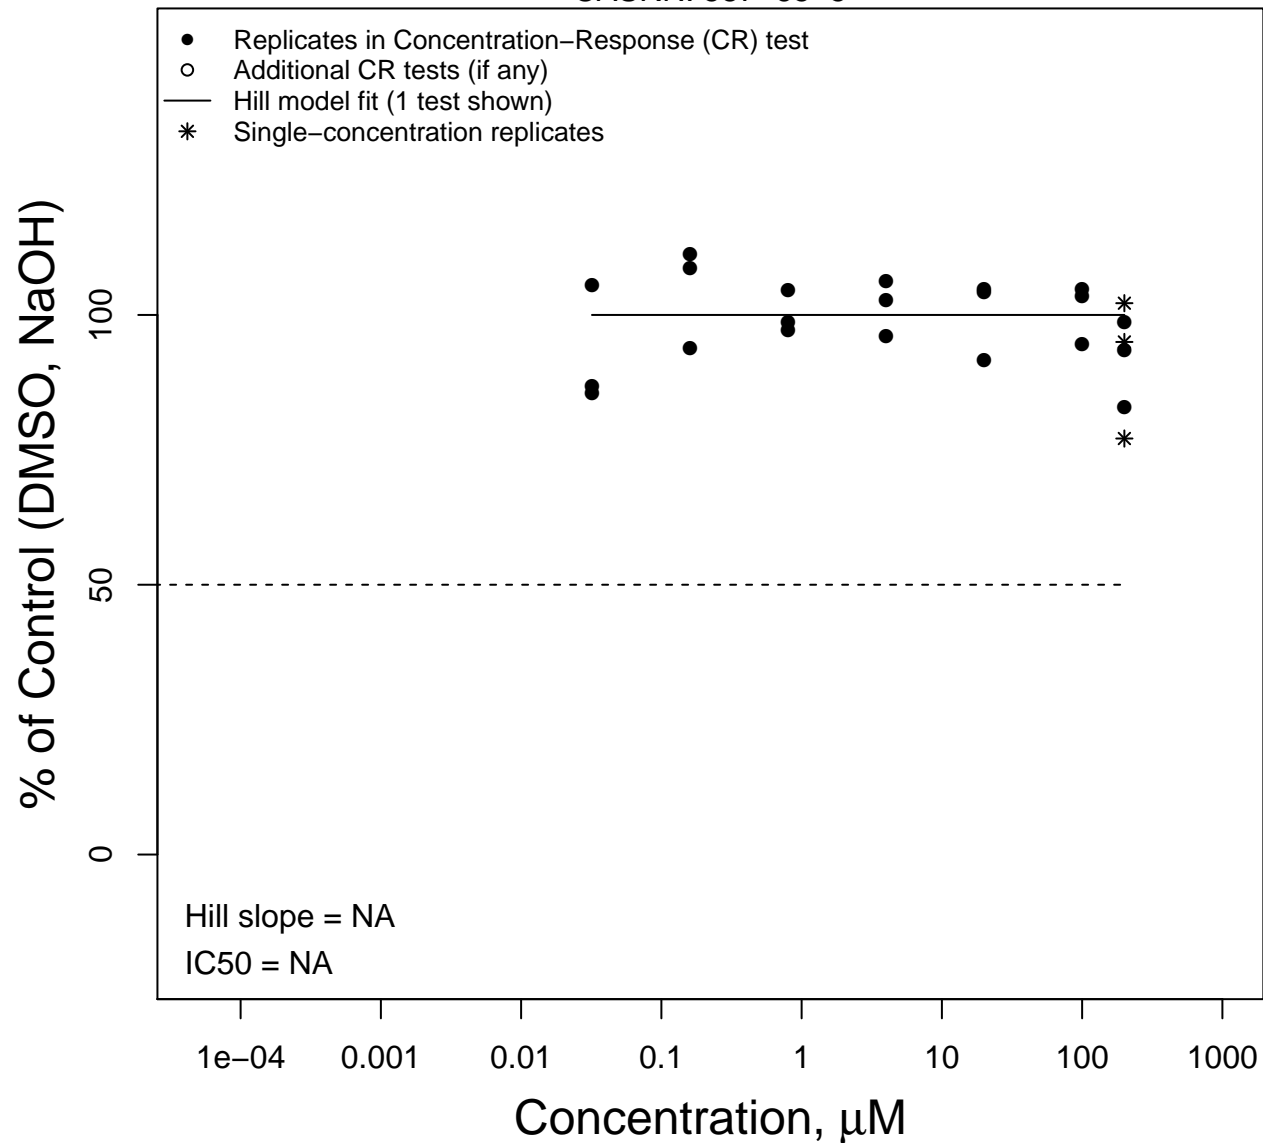

# 4-Butylphenol

CASRN: 1638-22-8

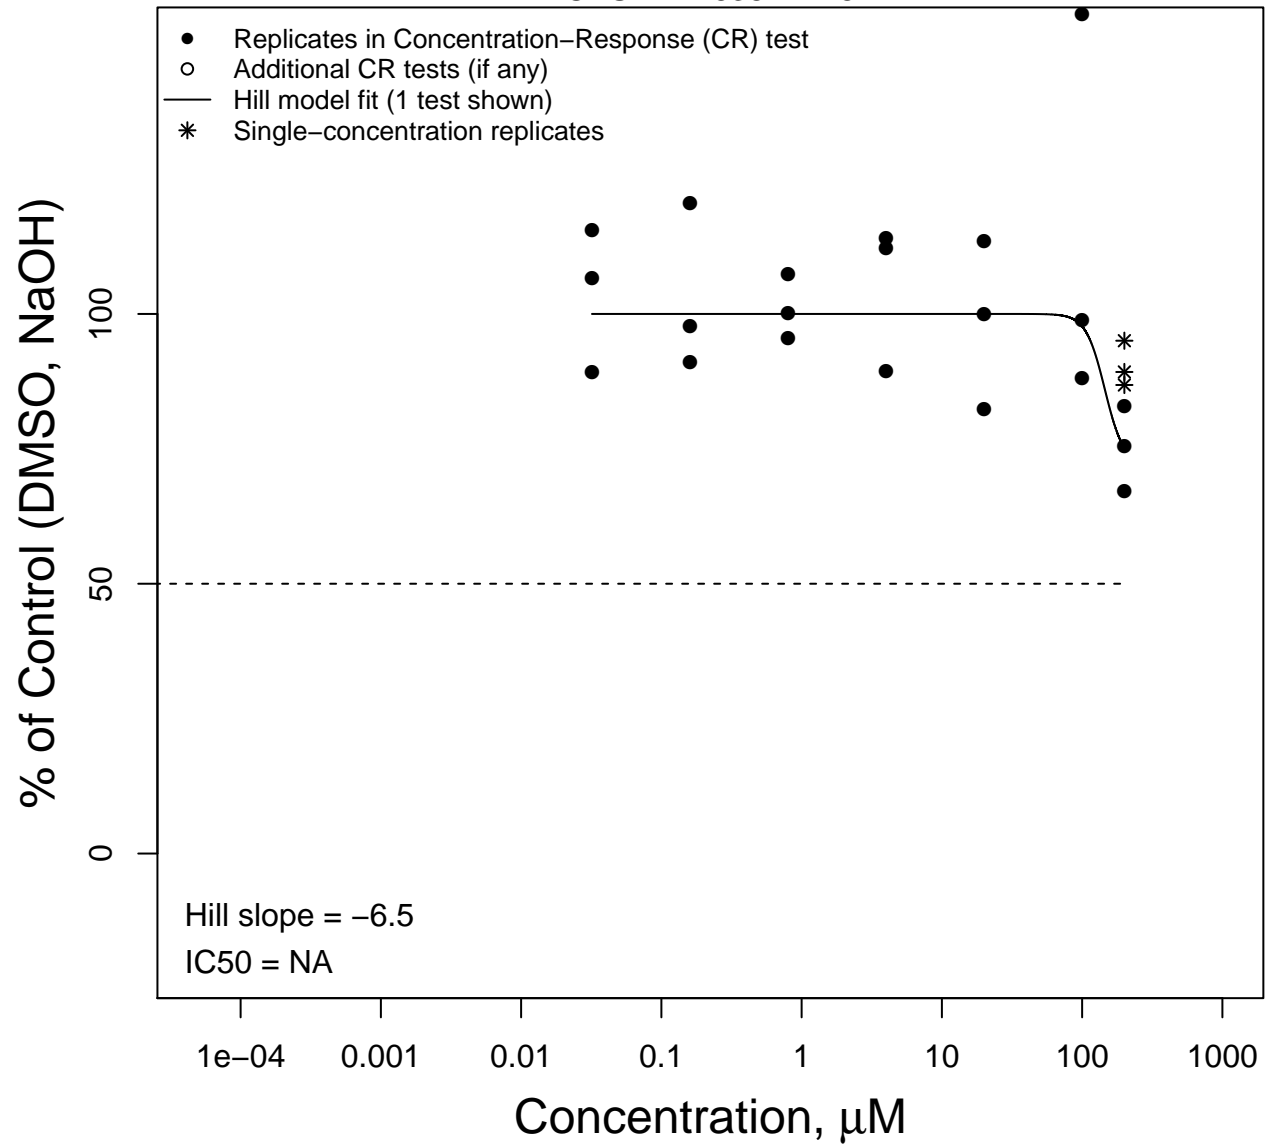

# Acrylonitrile

CASRN: 107-13-1

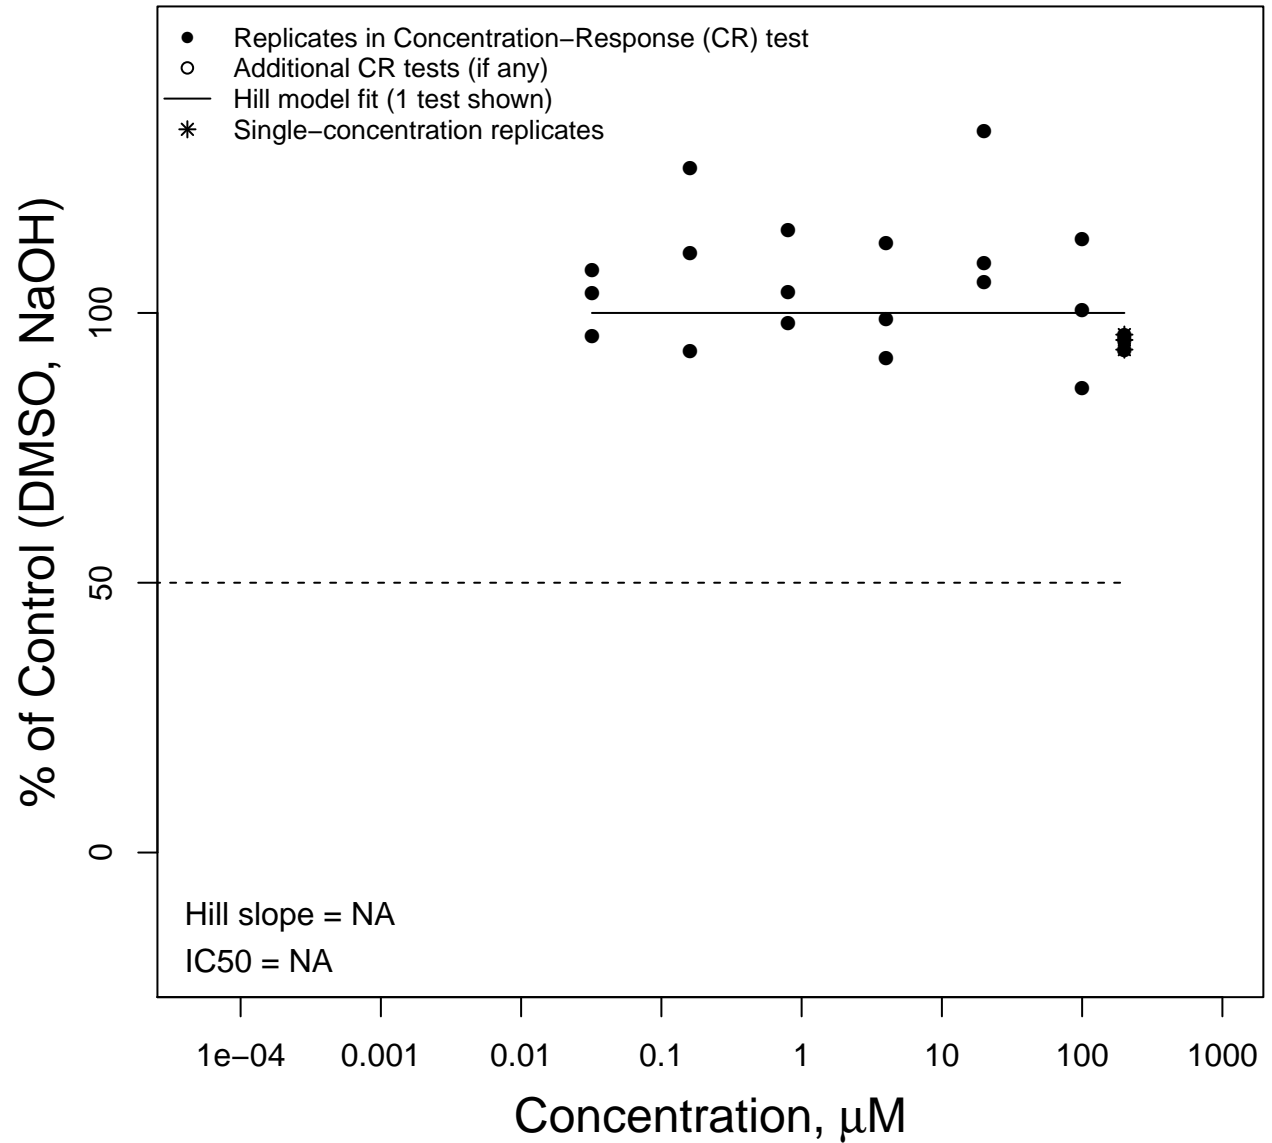

# 4,4'-Di-tert-butylbiphenyl

CASRN: 1625-91-8

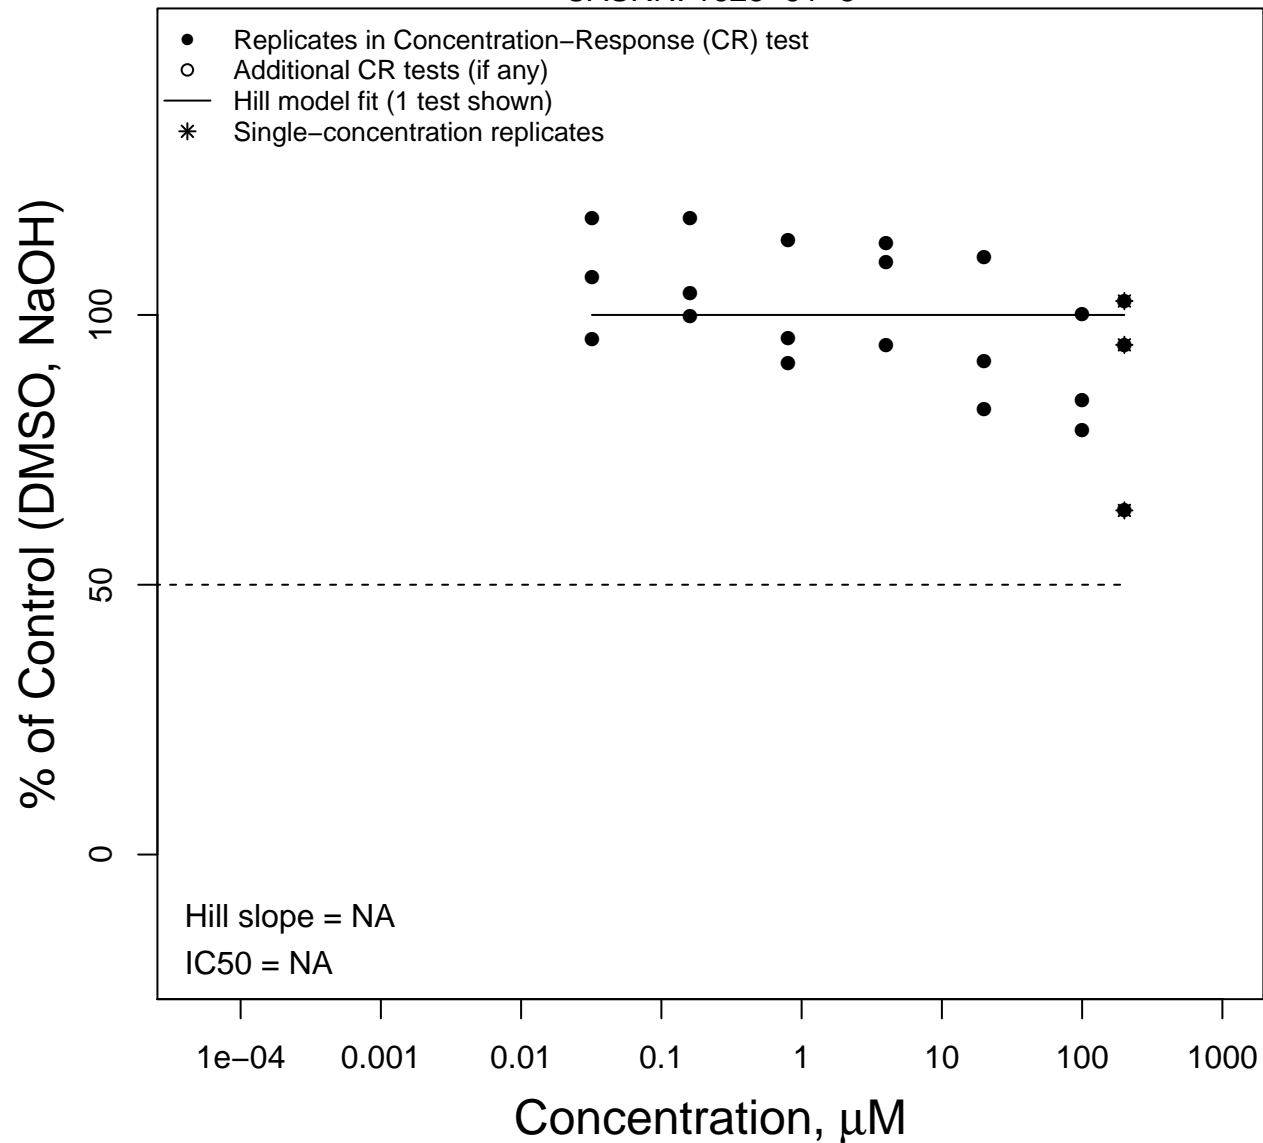



# Tributyltin benzoate

CASRN: 4342-36-3

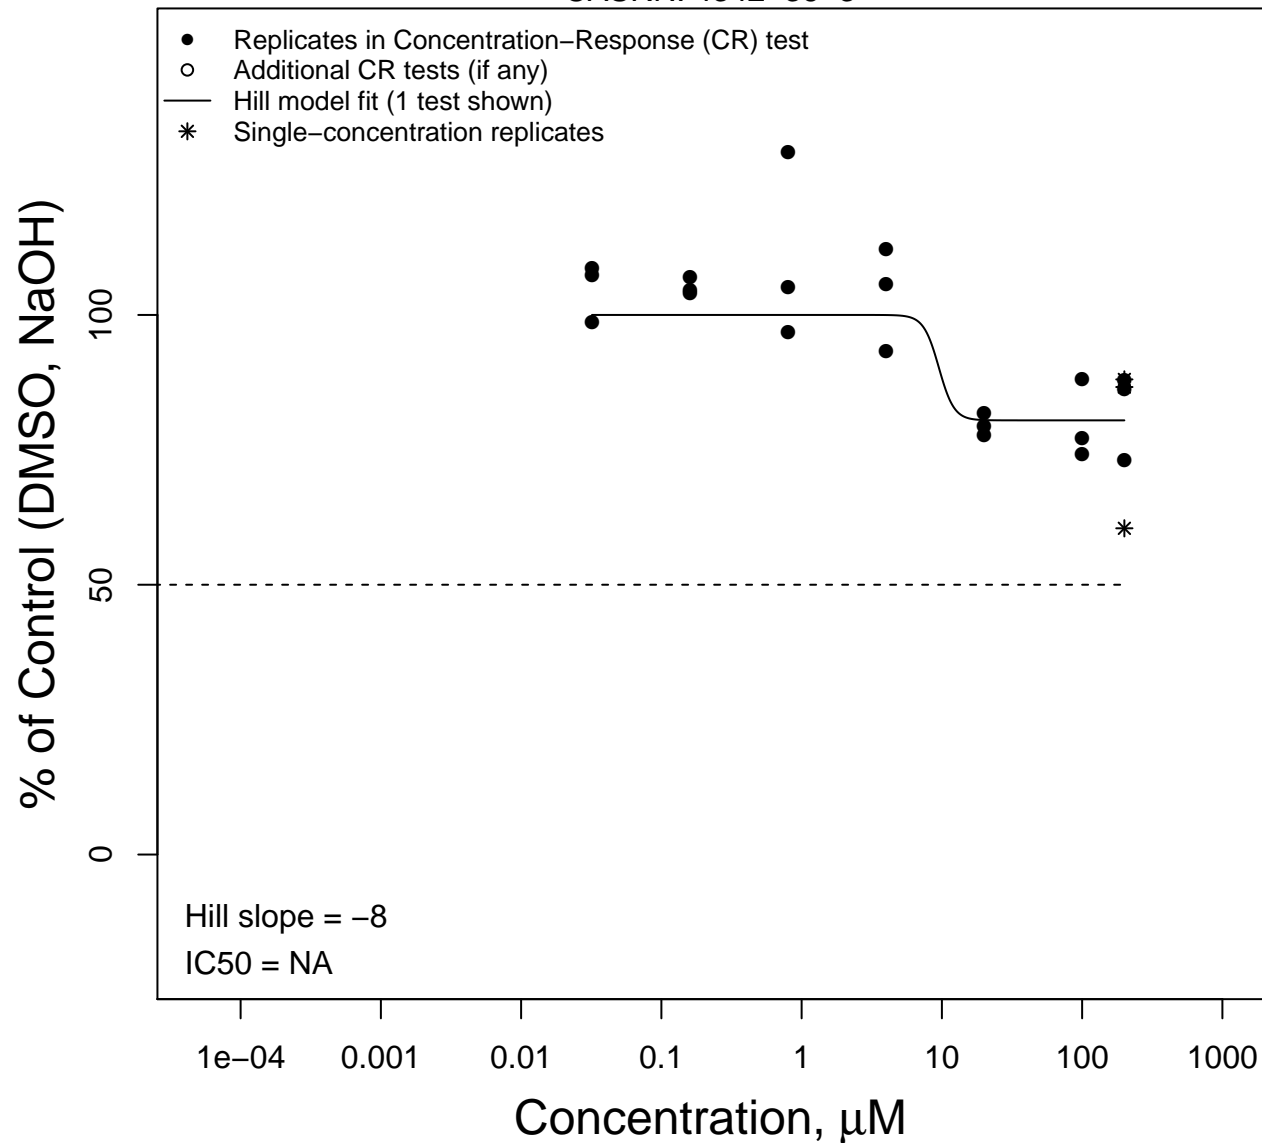

# Sodium tridecyl sulfate

CASRN: 3026-63-9

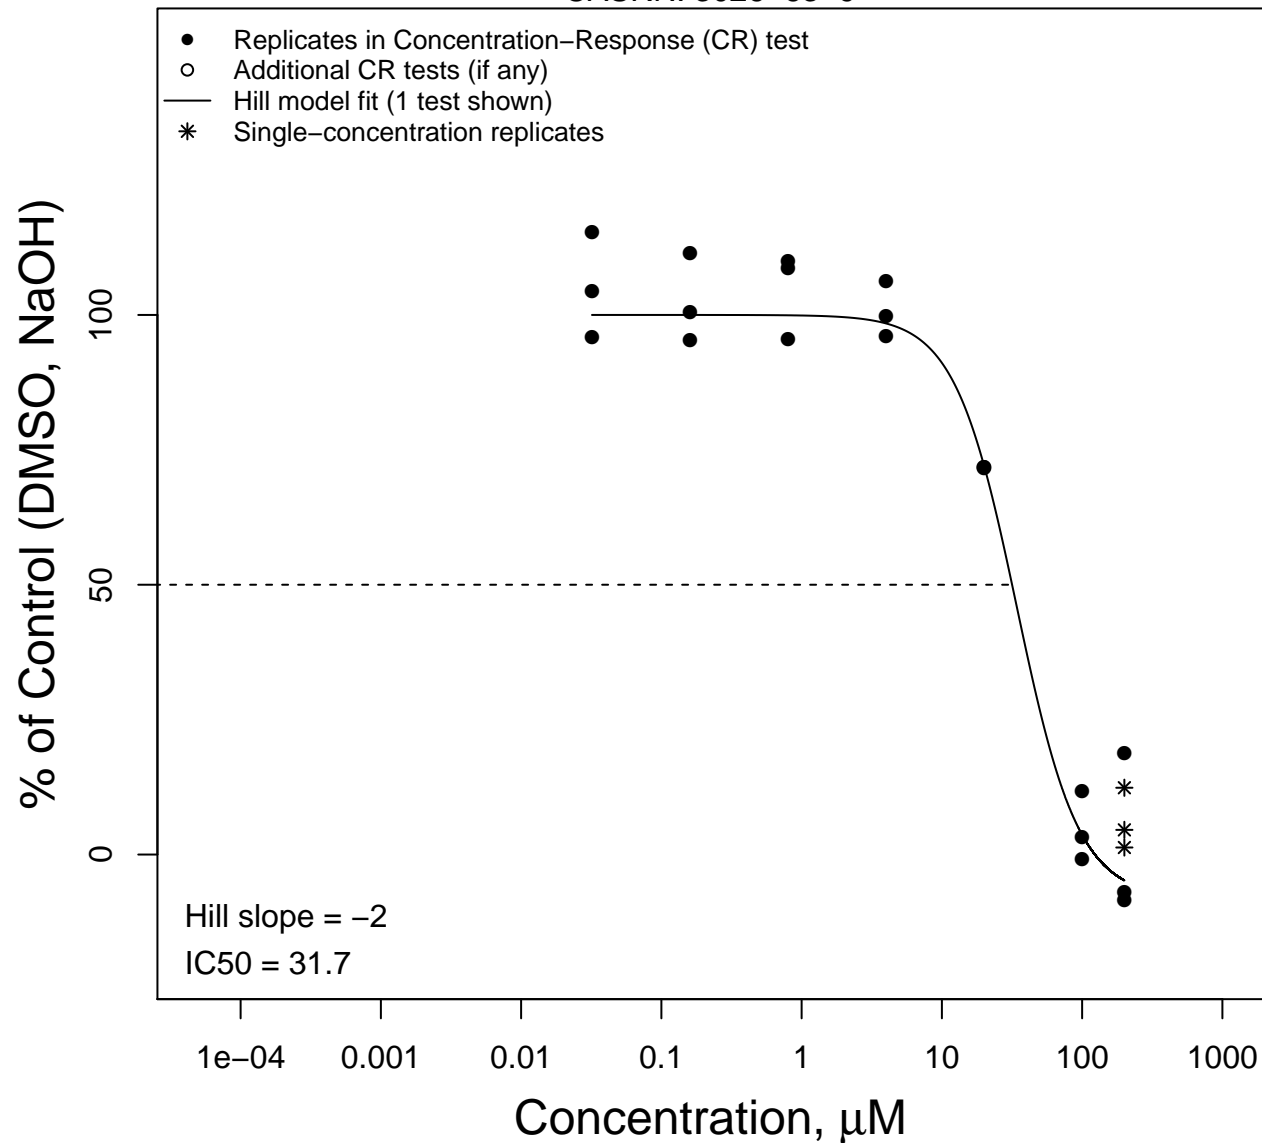



# 4,5-Dichloro-2-octyl-3(2H)-isothiazolone

CASRN: 64359-81-5

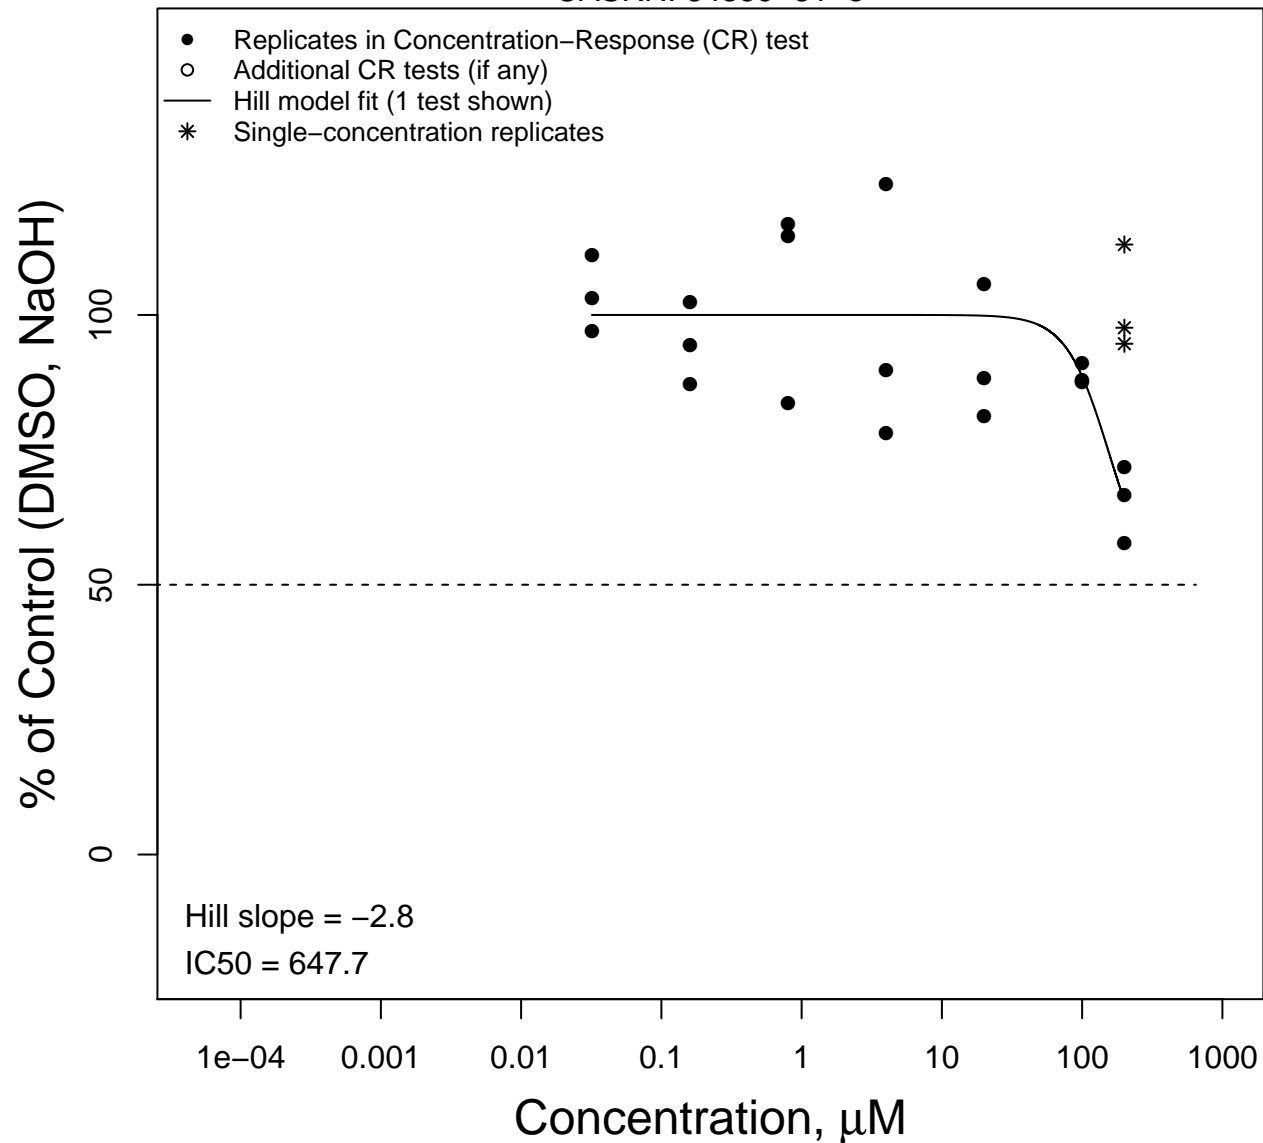

# 4-Dodecylmorpholine

CASRN: 1541-81-7

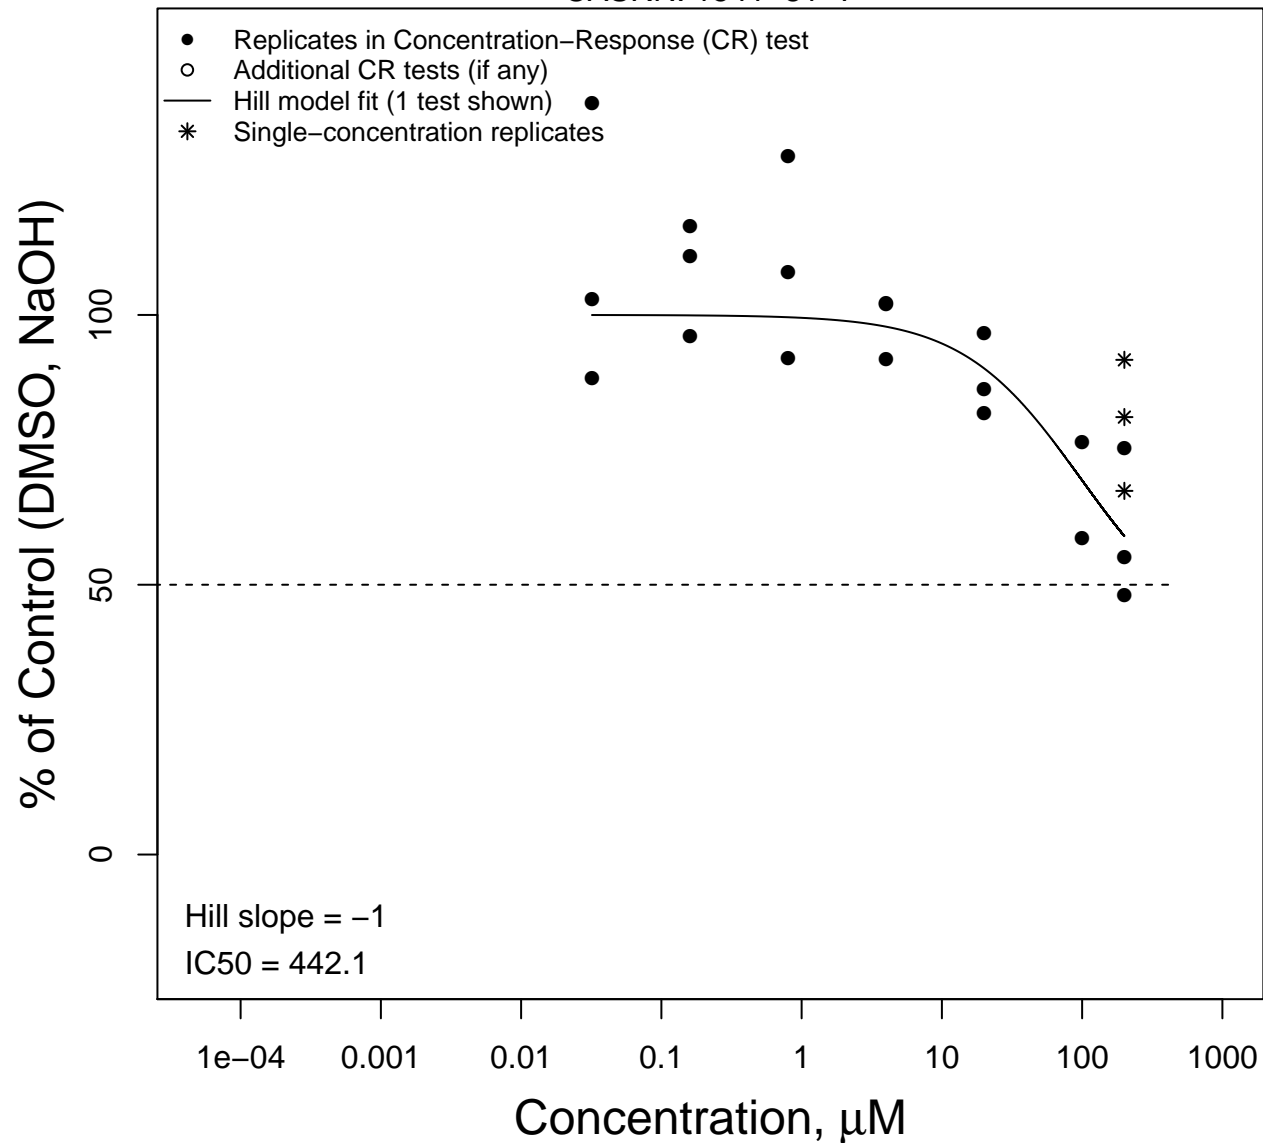



# Dibutyl phthalate

CASRN: 84-74-2

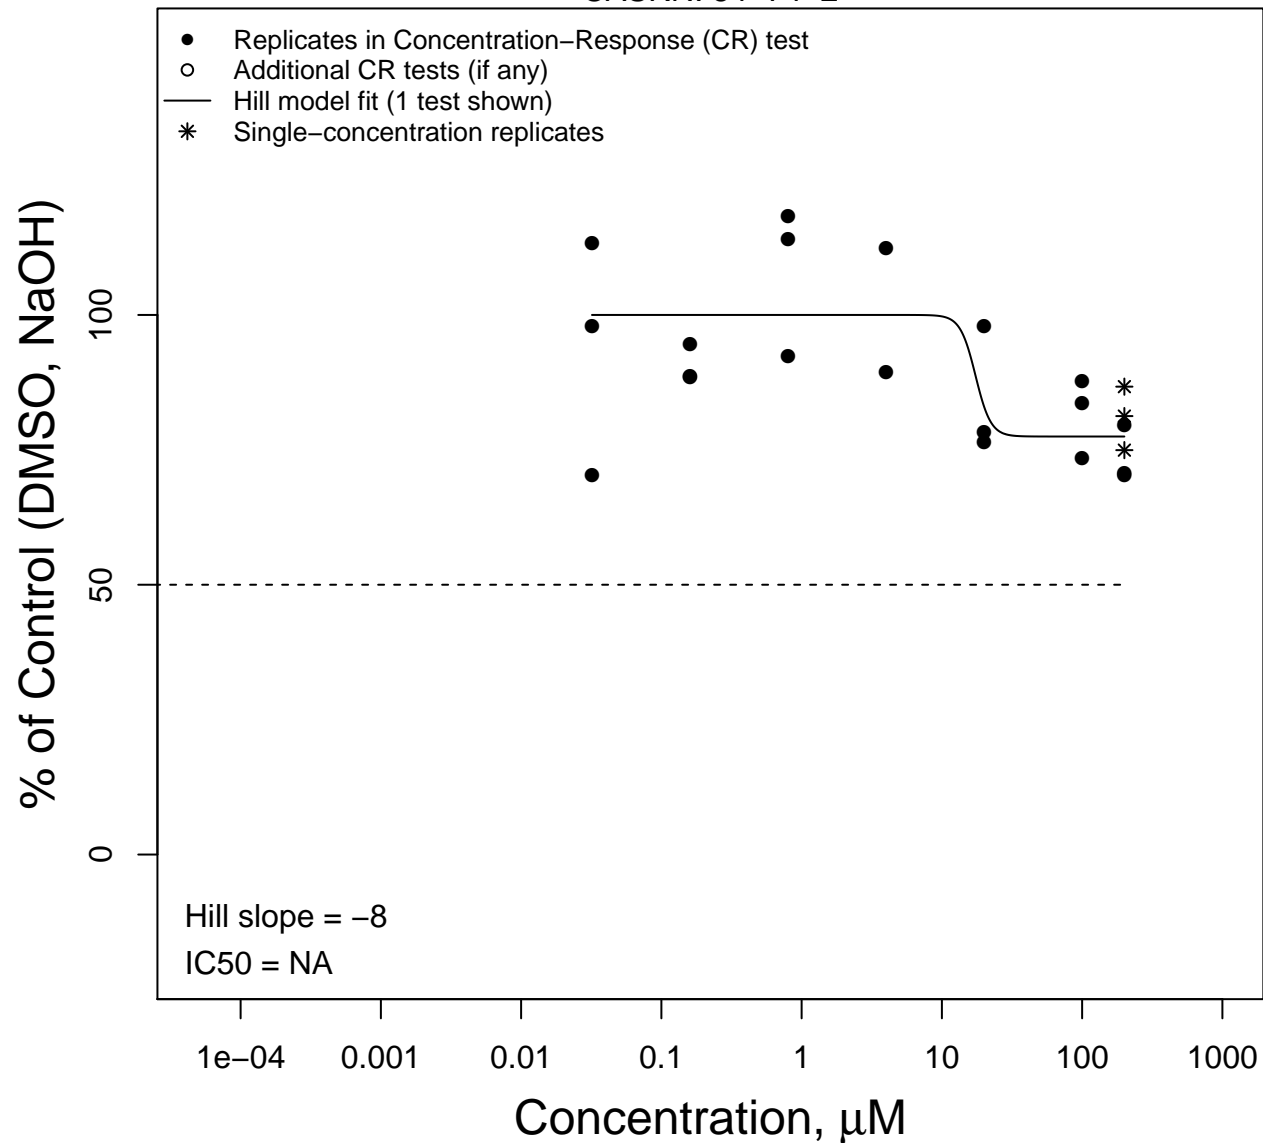





# 2,2'-(Tetradecylimino)diethanol

CASRN: 18924-66-8

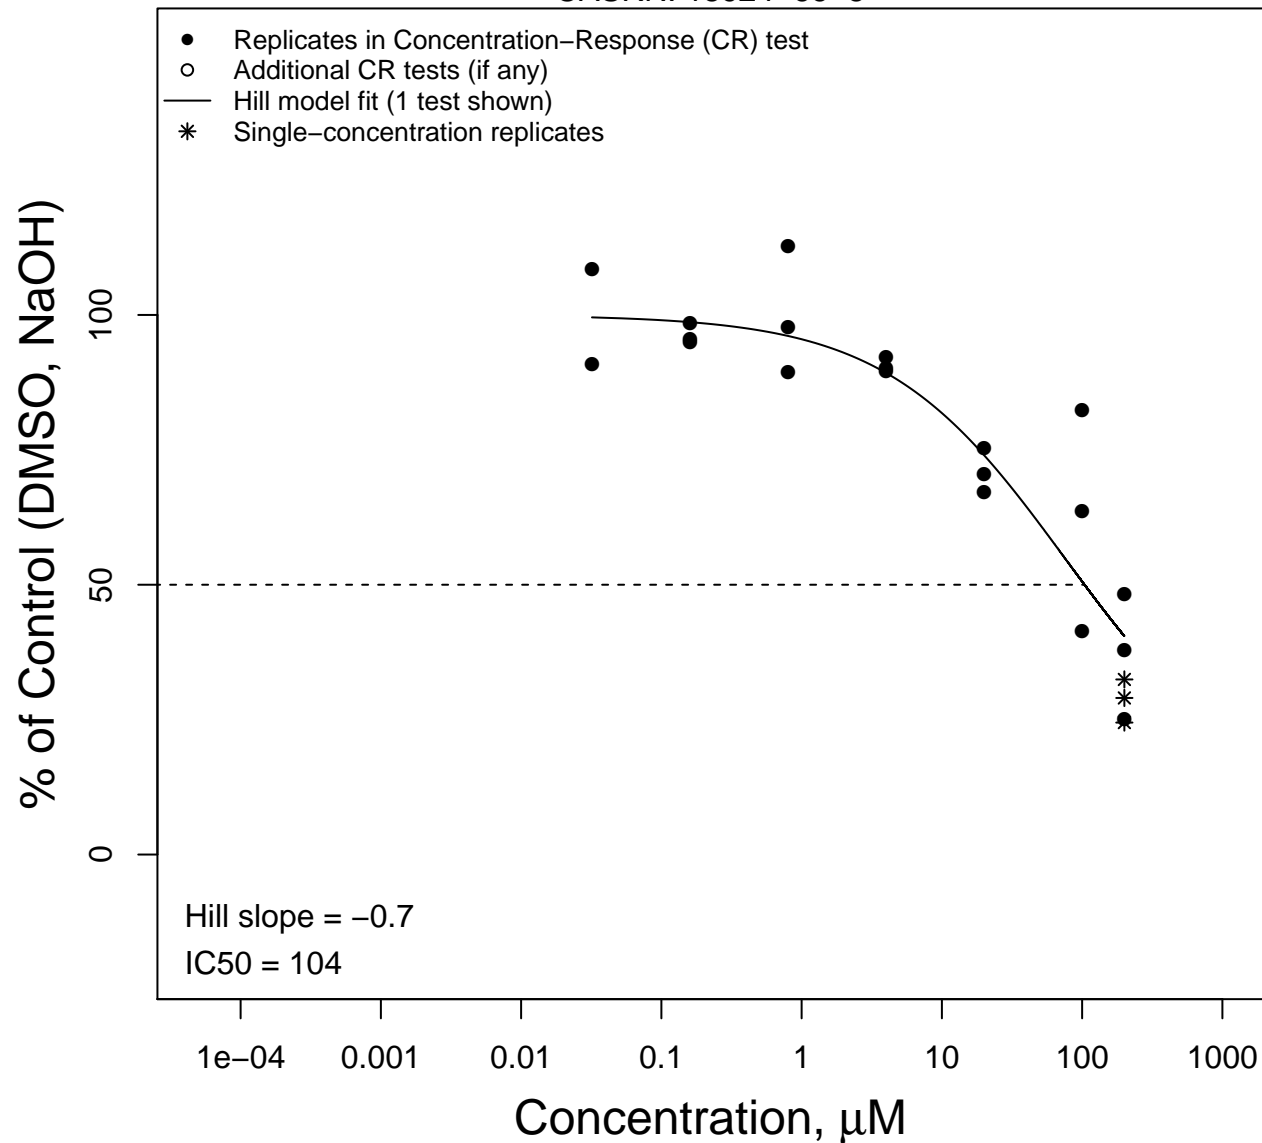

# Disiquonium chloride

CASRN: 68959-20-6

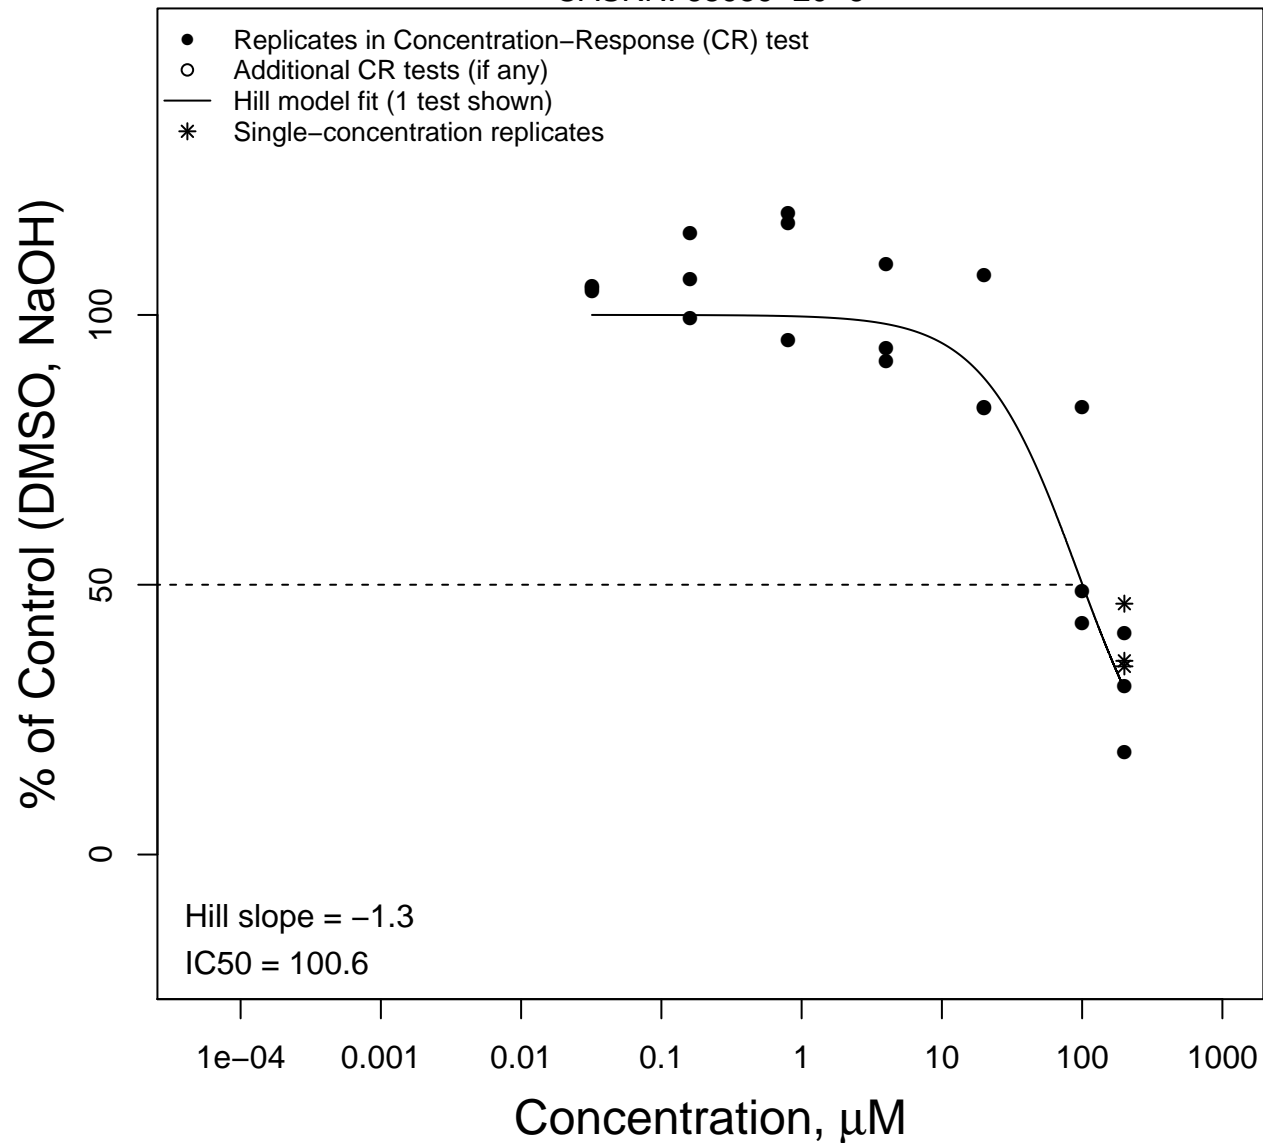

# Bisphenol A diglycidyl ether

CASRN: 1675-54-3

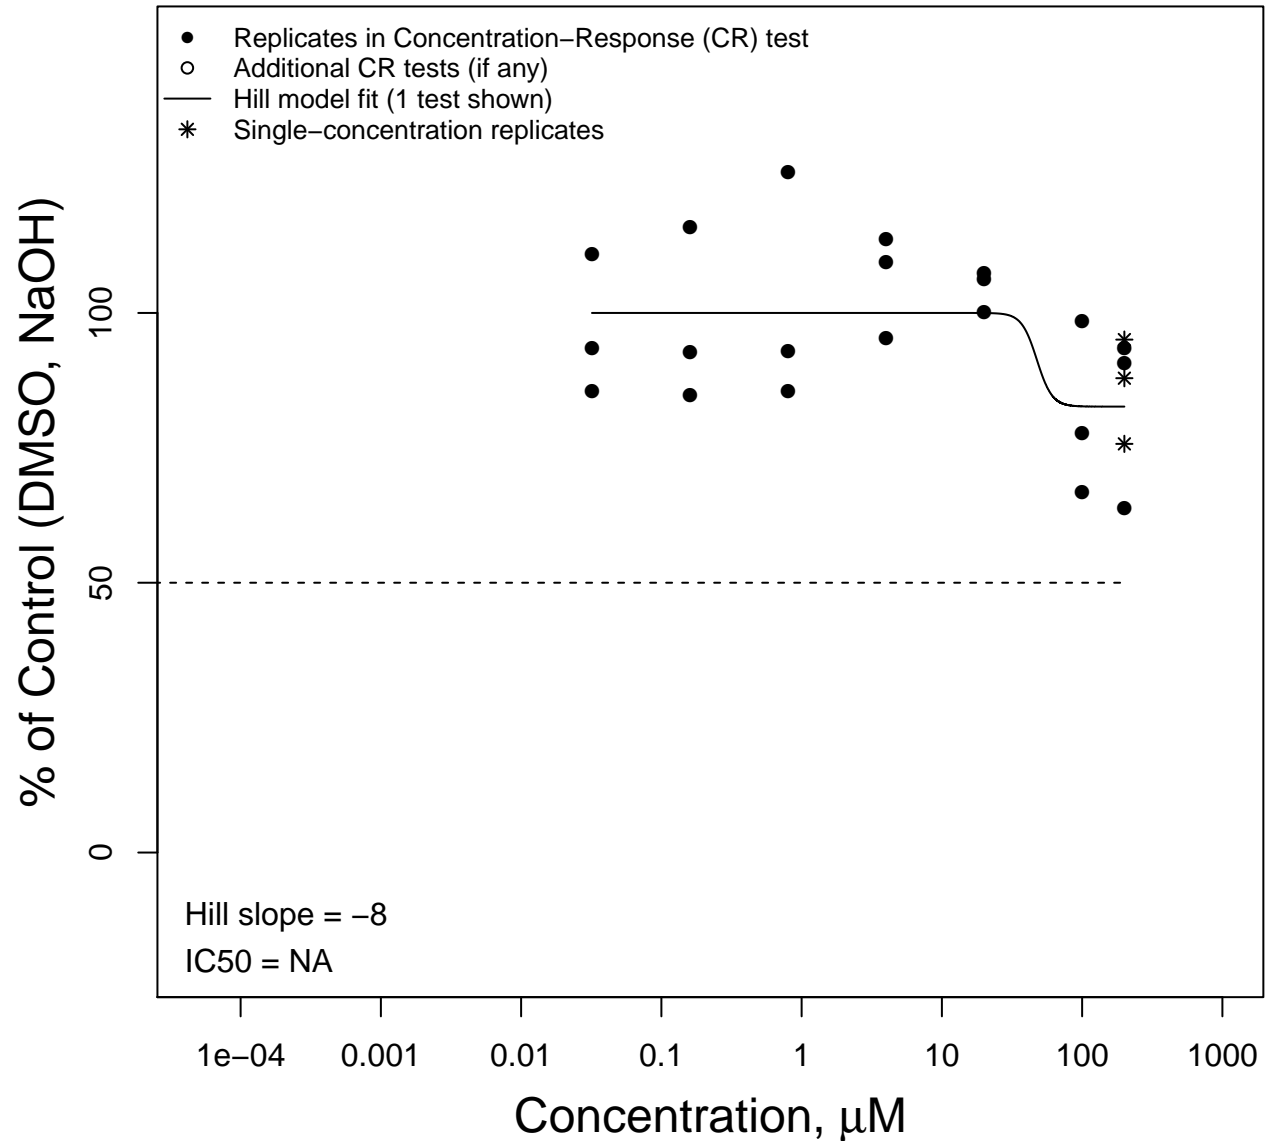

# Hexadecyltrimethylammonium bromide

CASRN: 57-09-0

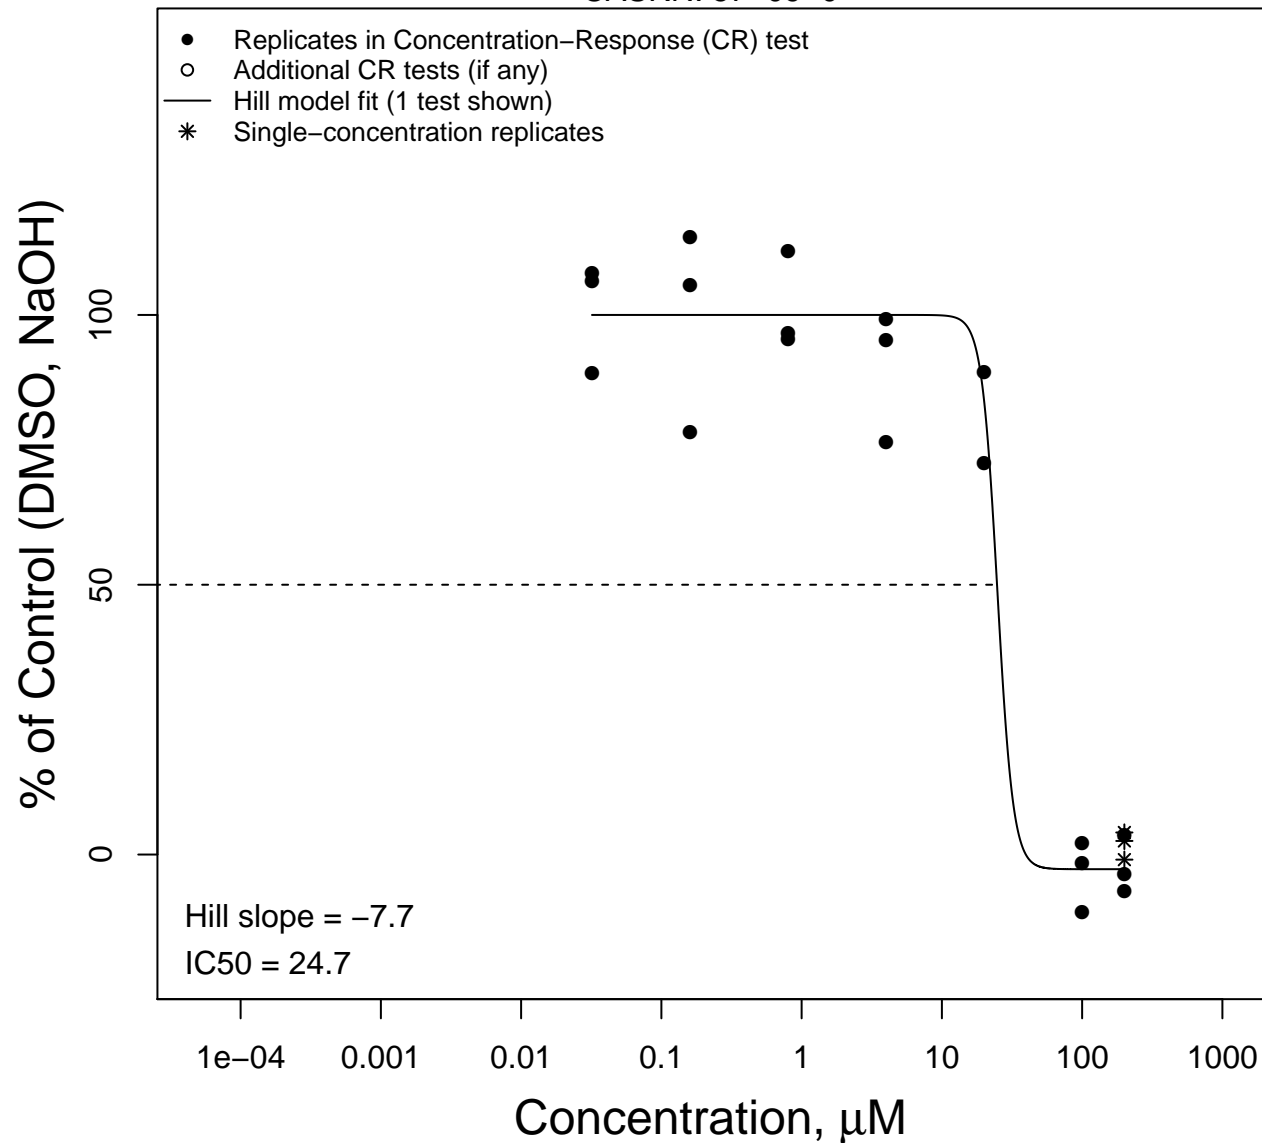

# Tetradecanoic acid

CASRN: 544-63-8

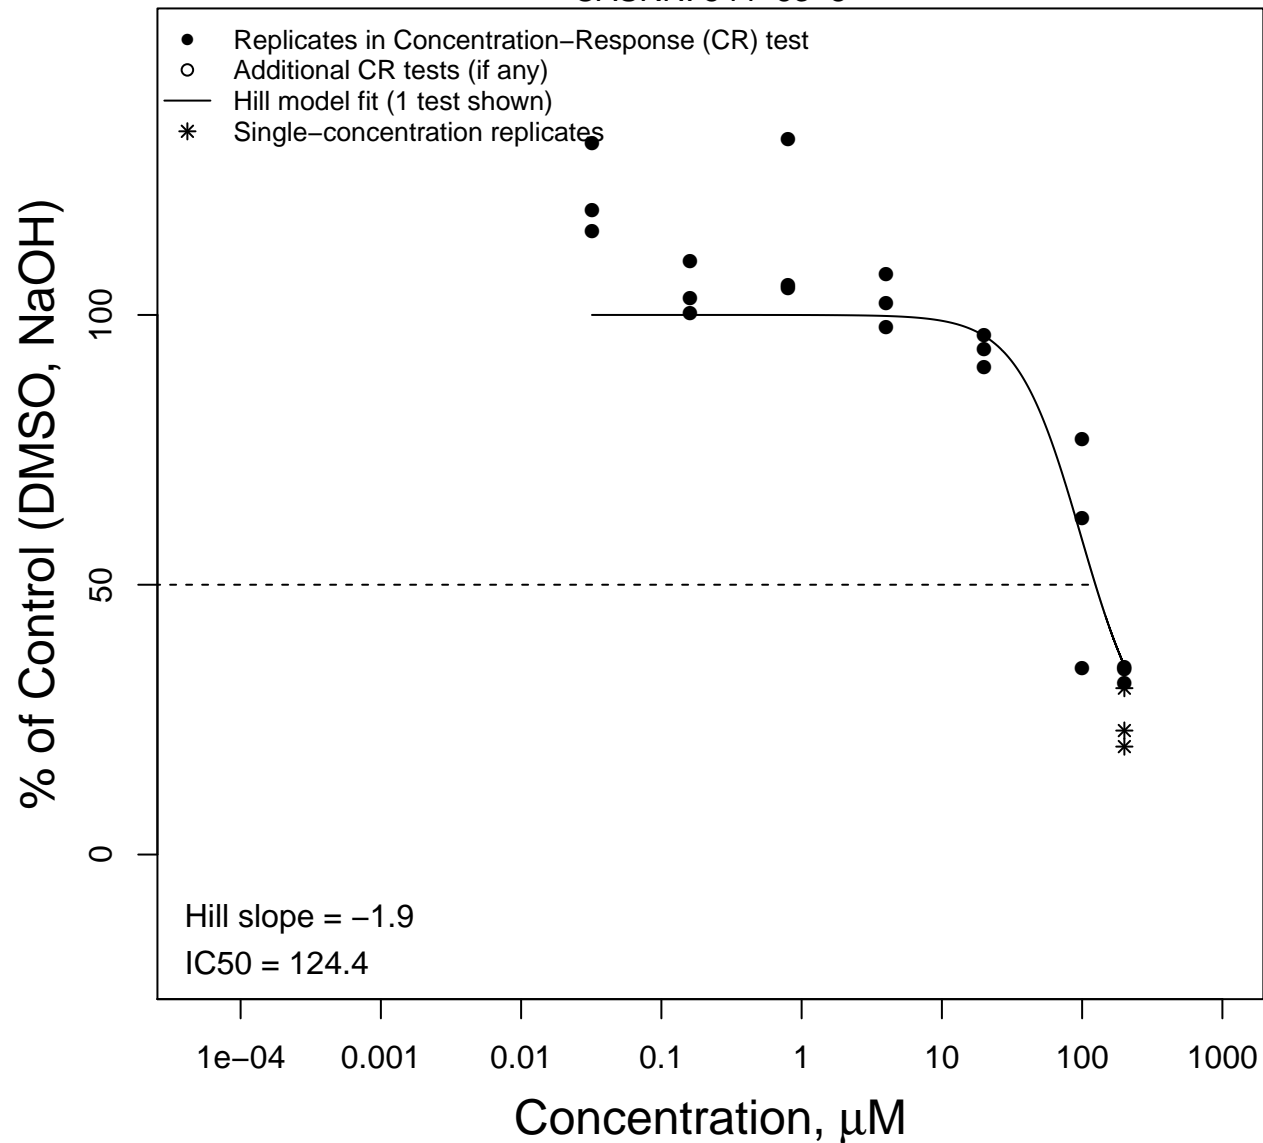

# Dichlorophen

CASRN: 97-23-4

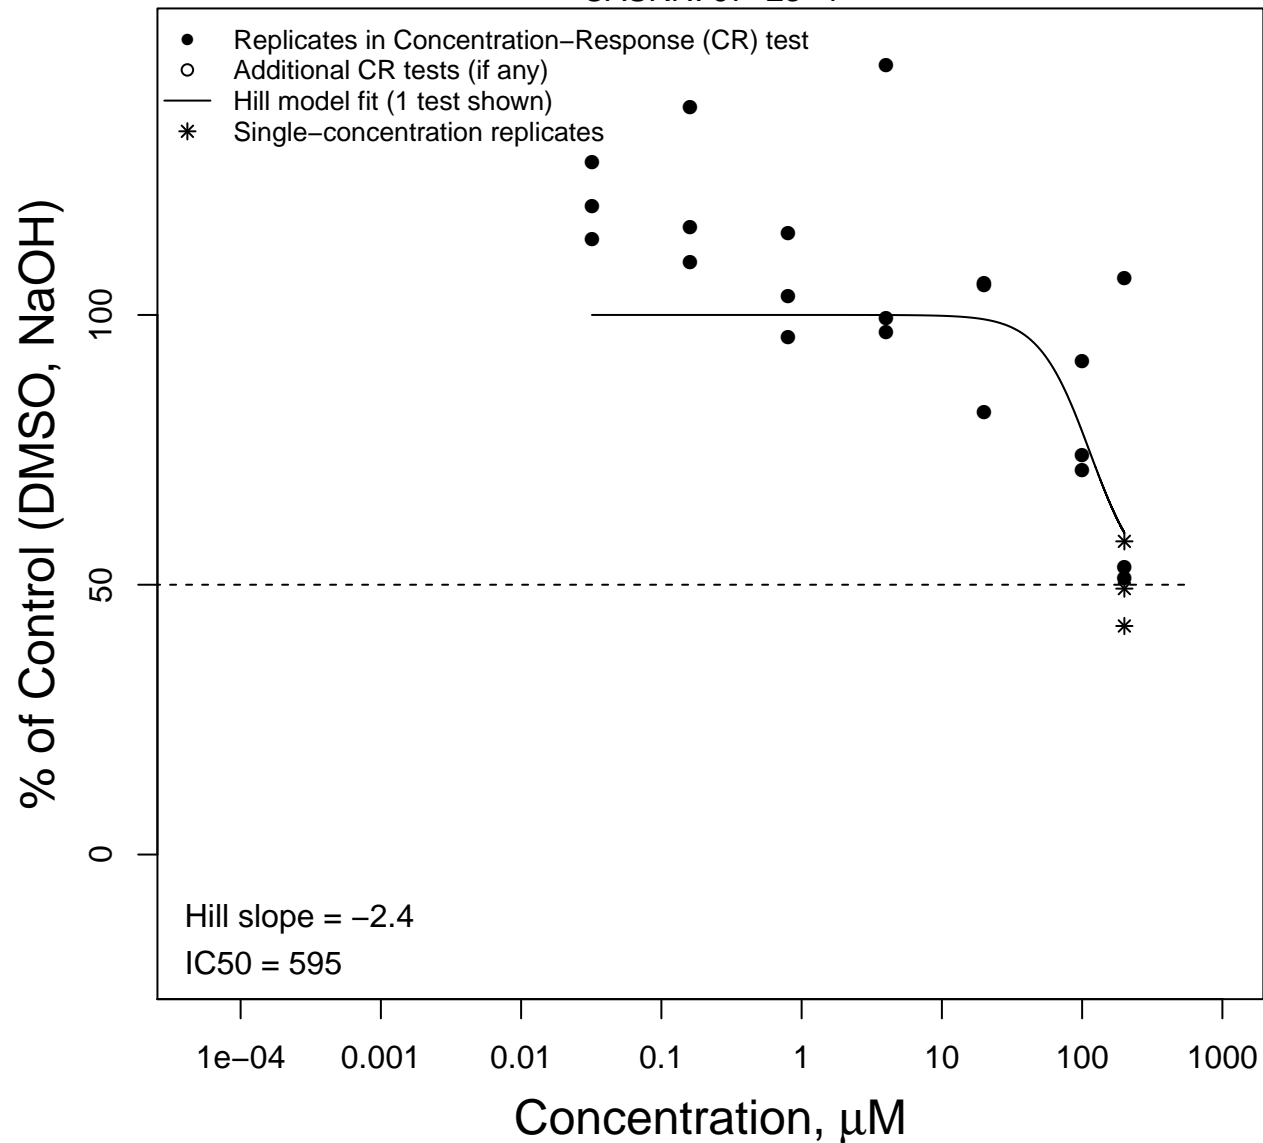

# Bromophenol blue

CASRN: 115-39-9

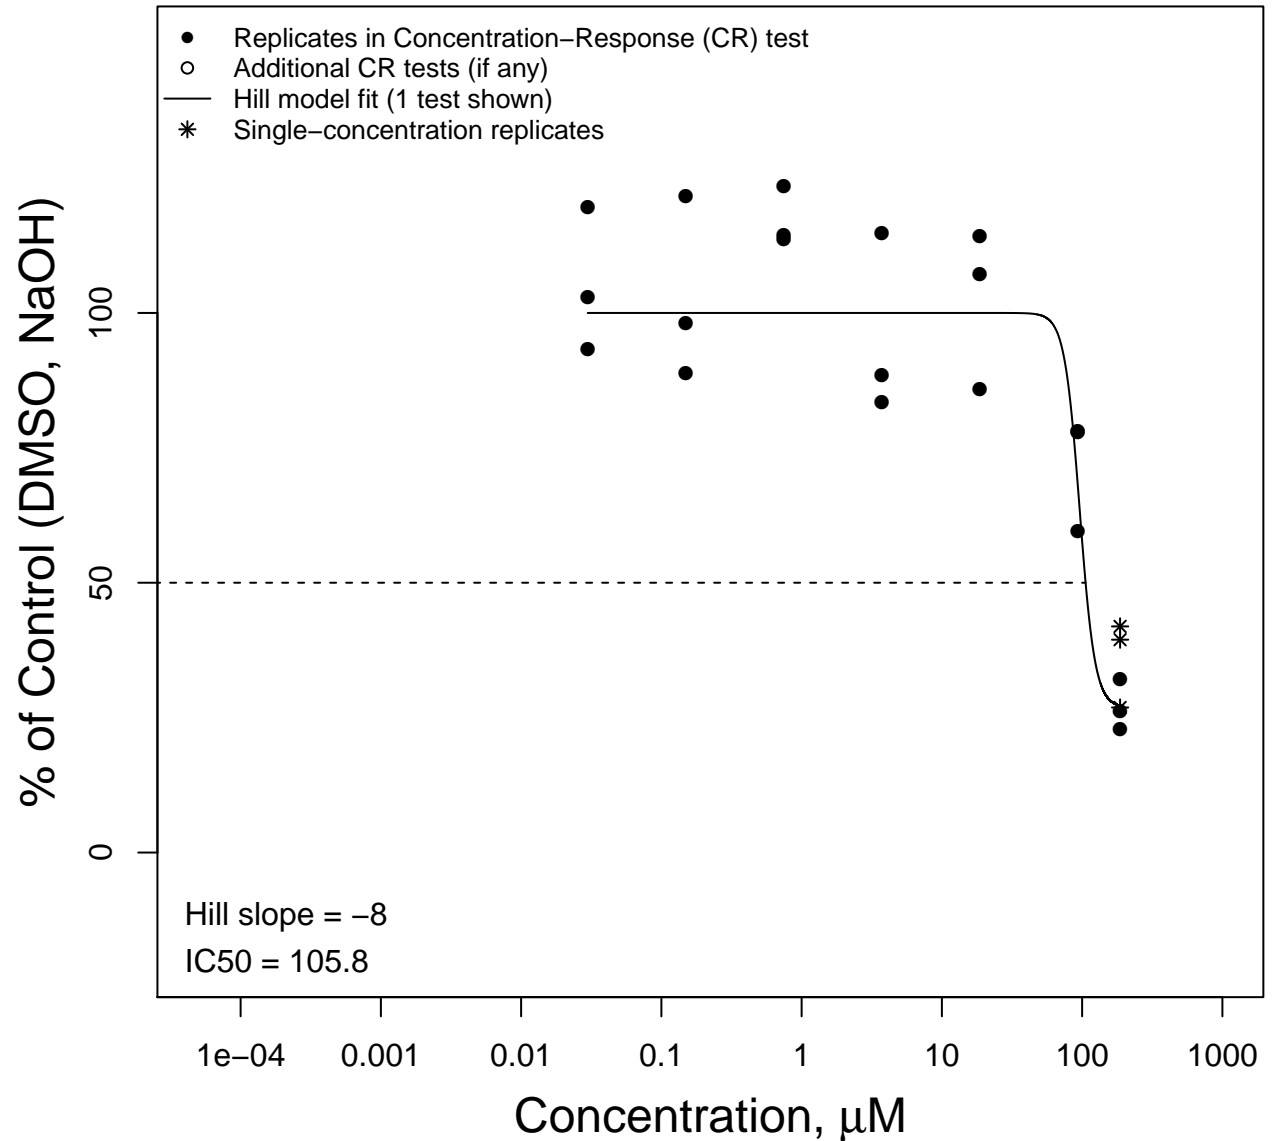

# Octadecyl sulfate sodium salt

CASRN: 1120-04-3

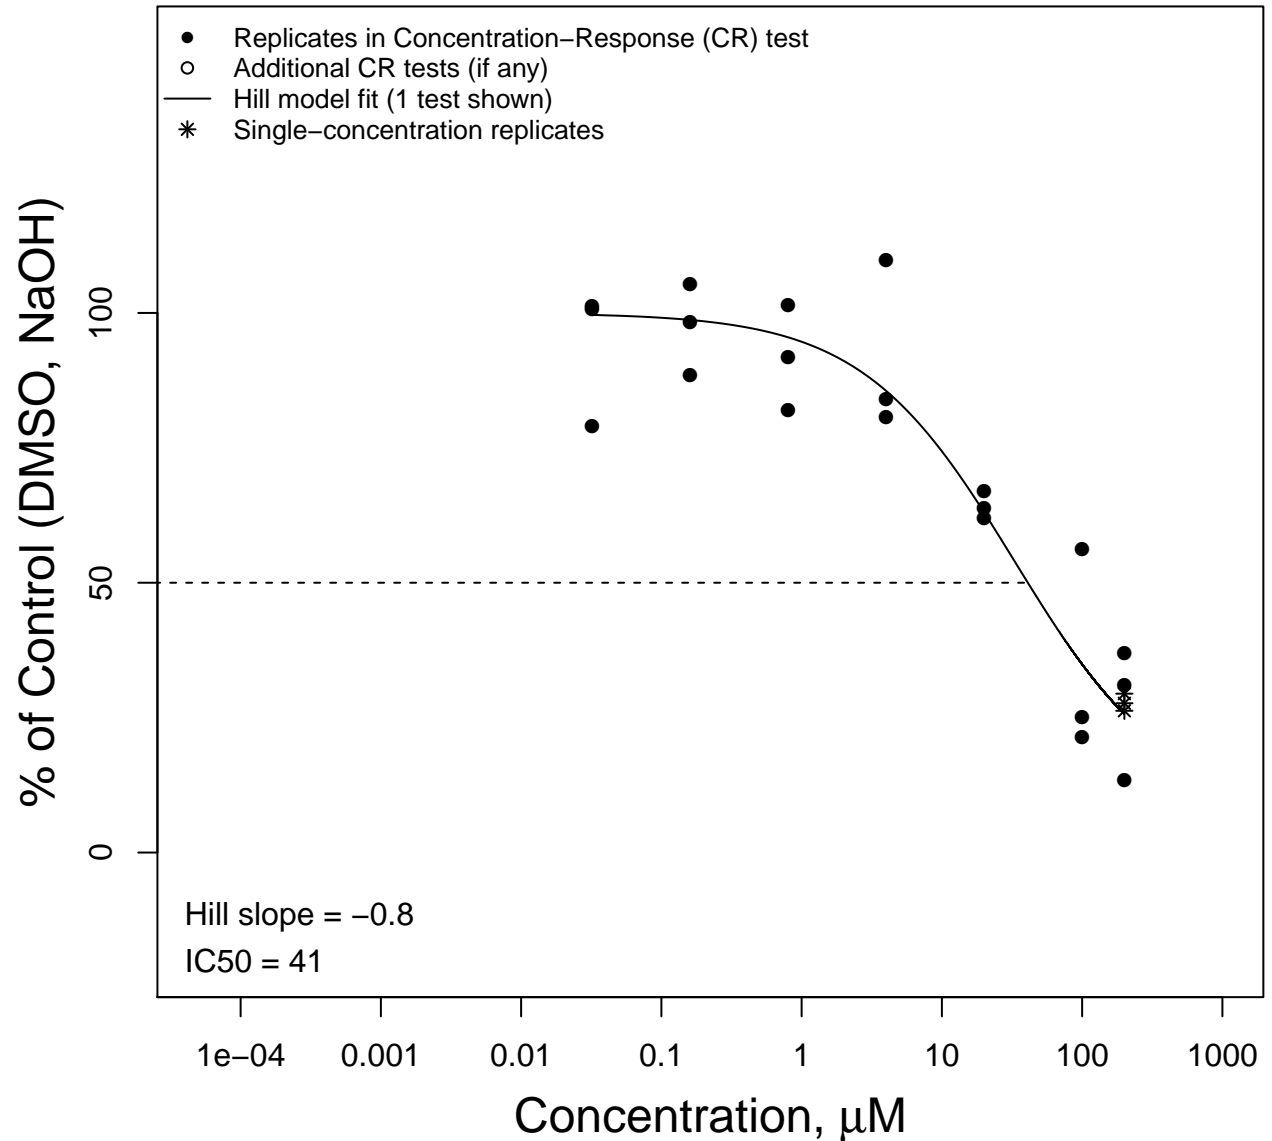



# Dichlone

CASRN: 117-80-6

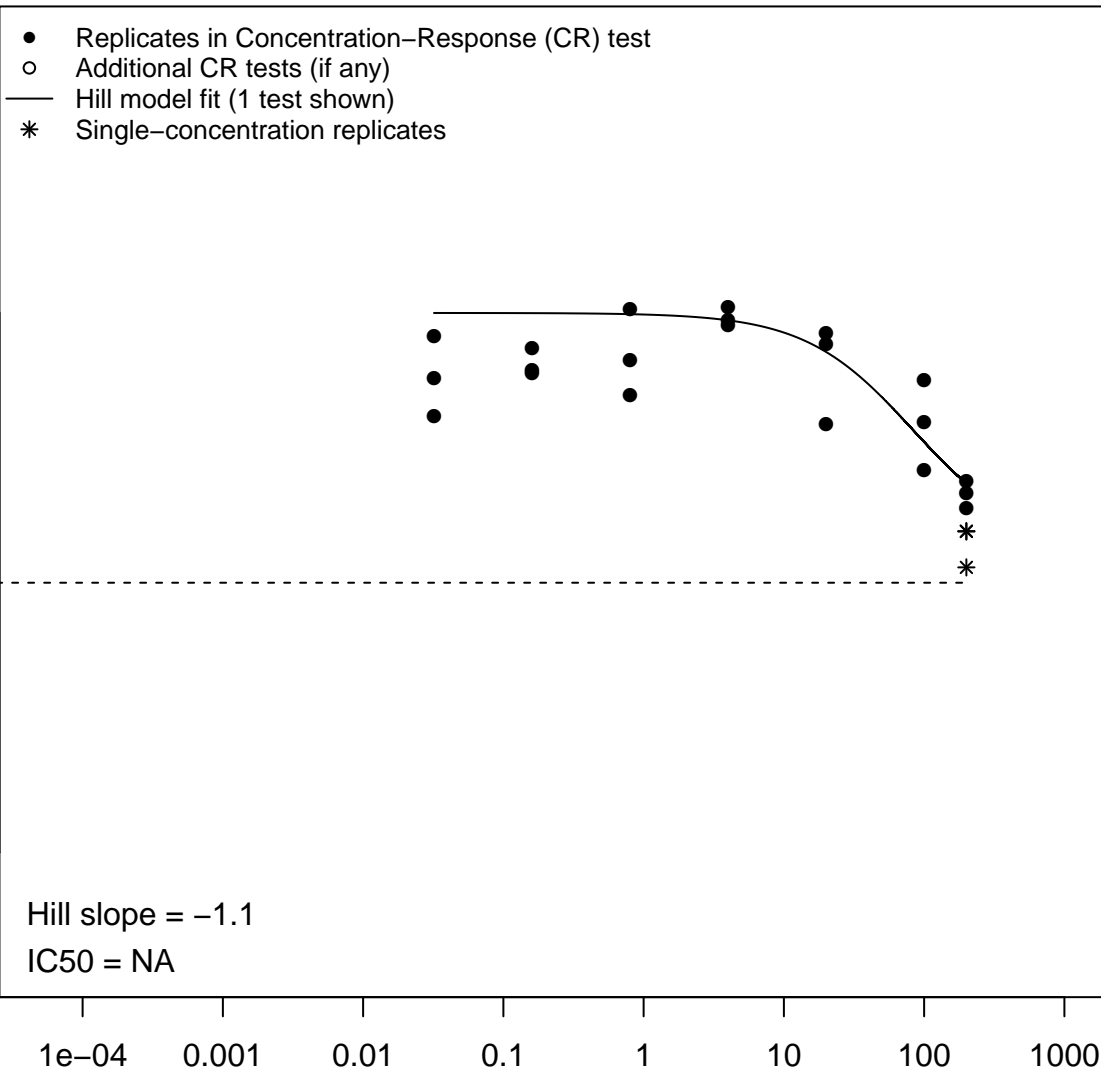

Concentration, µM

# 6-Hydroxy-2-naphthyl disulfide

CASRN: 6088-51-3

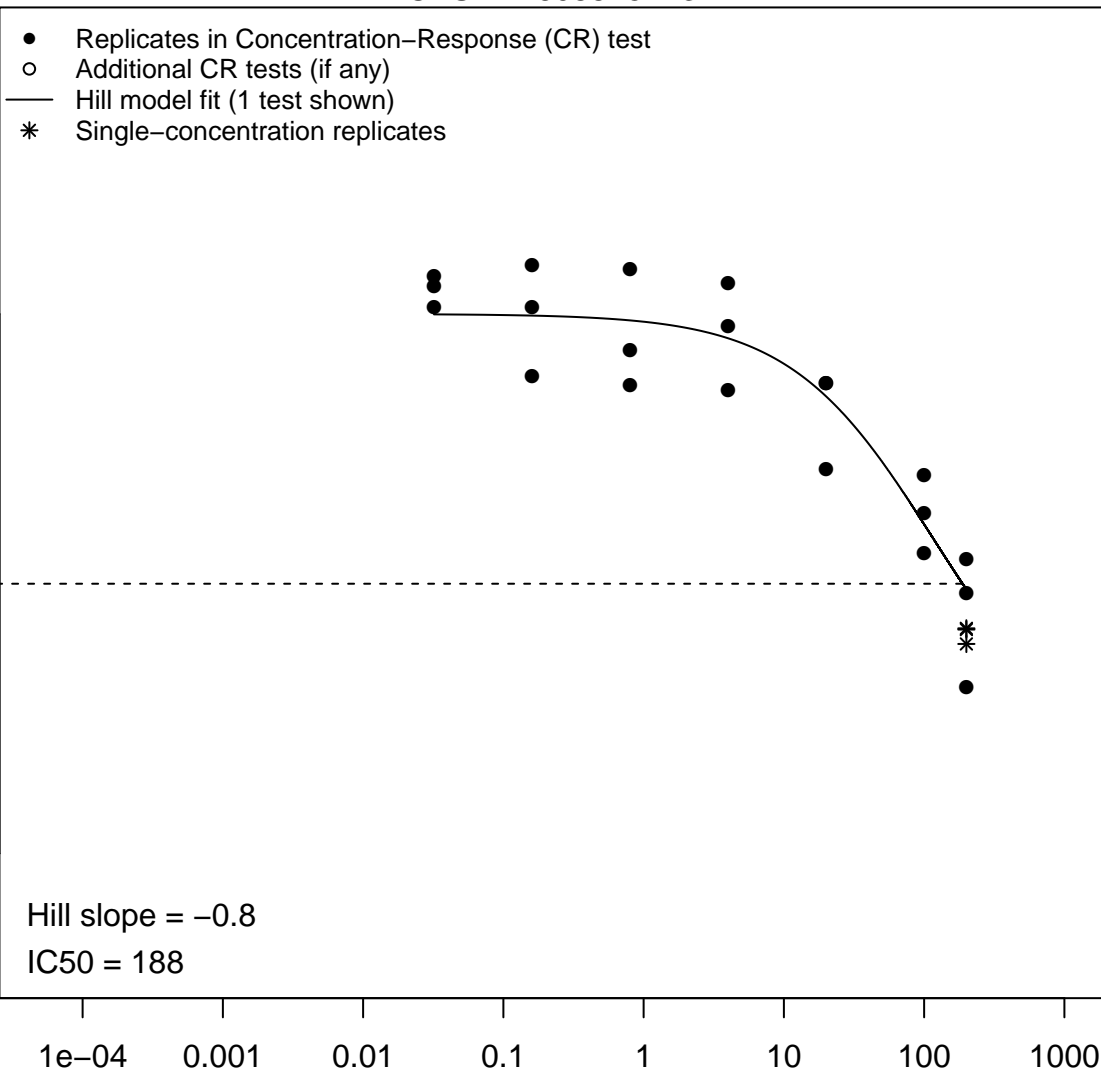

Concentration, µM

# Linolenic acid

CASRN: 463-40-1

- Replicates in Concentration-Response (CR) test
- Additional CR tests (if any)
- Hill model fit (1 test shown)
- \* Single-concentration replicates

% of Control (DMSO, NaOH)

100

50

0

Hill slope = NA

IC50 = NA

1e-04

0.001

0.01

0.1

1

10

100

1000

Concentration,  $\mu\text{M}$

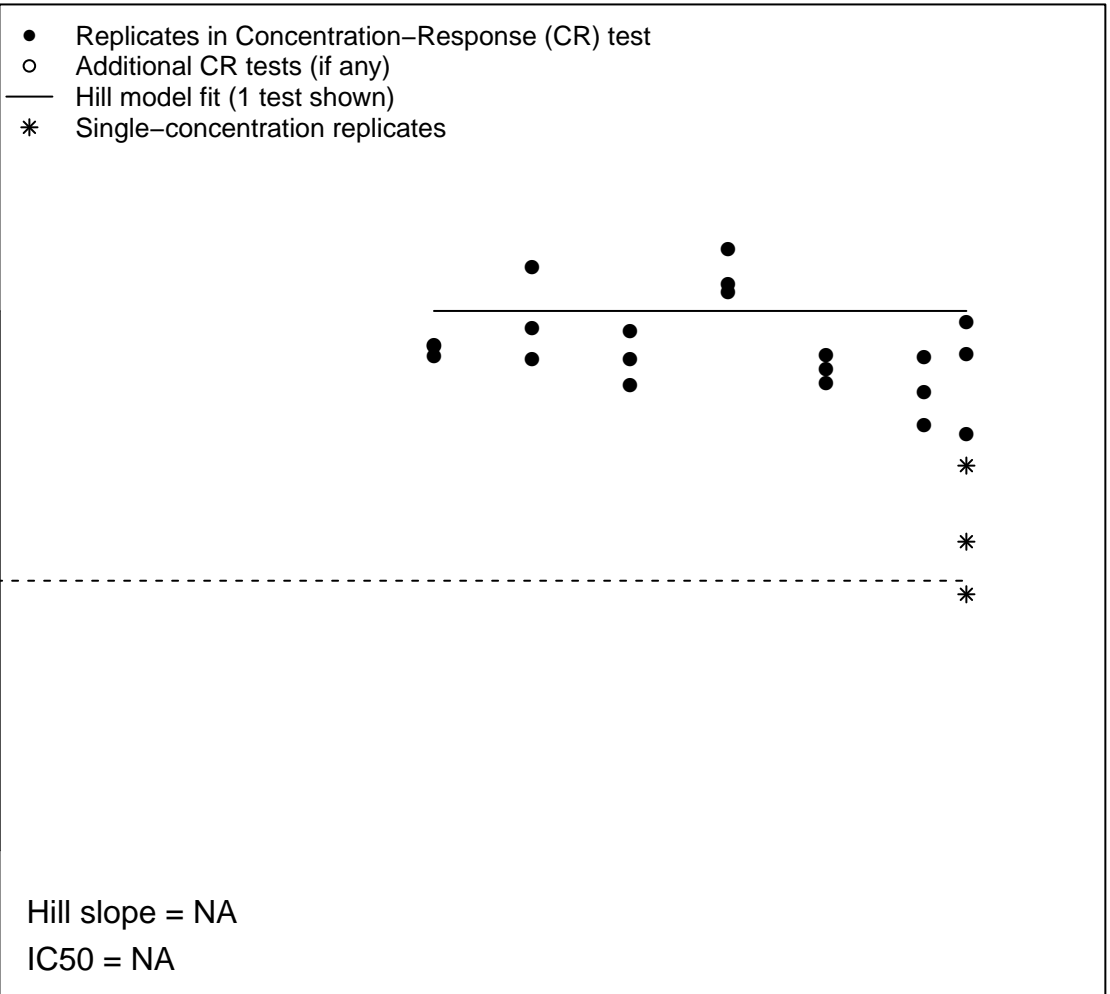

# 4,5-Dichloro-3H-1,2-dithiol-3-one

CASRN: 1192-52-5

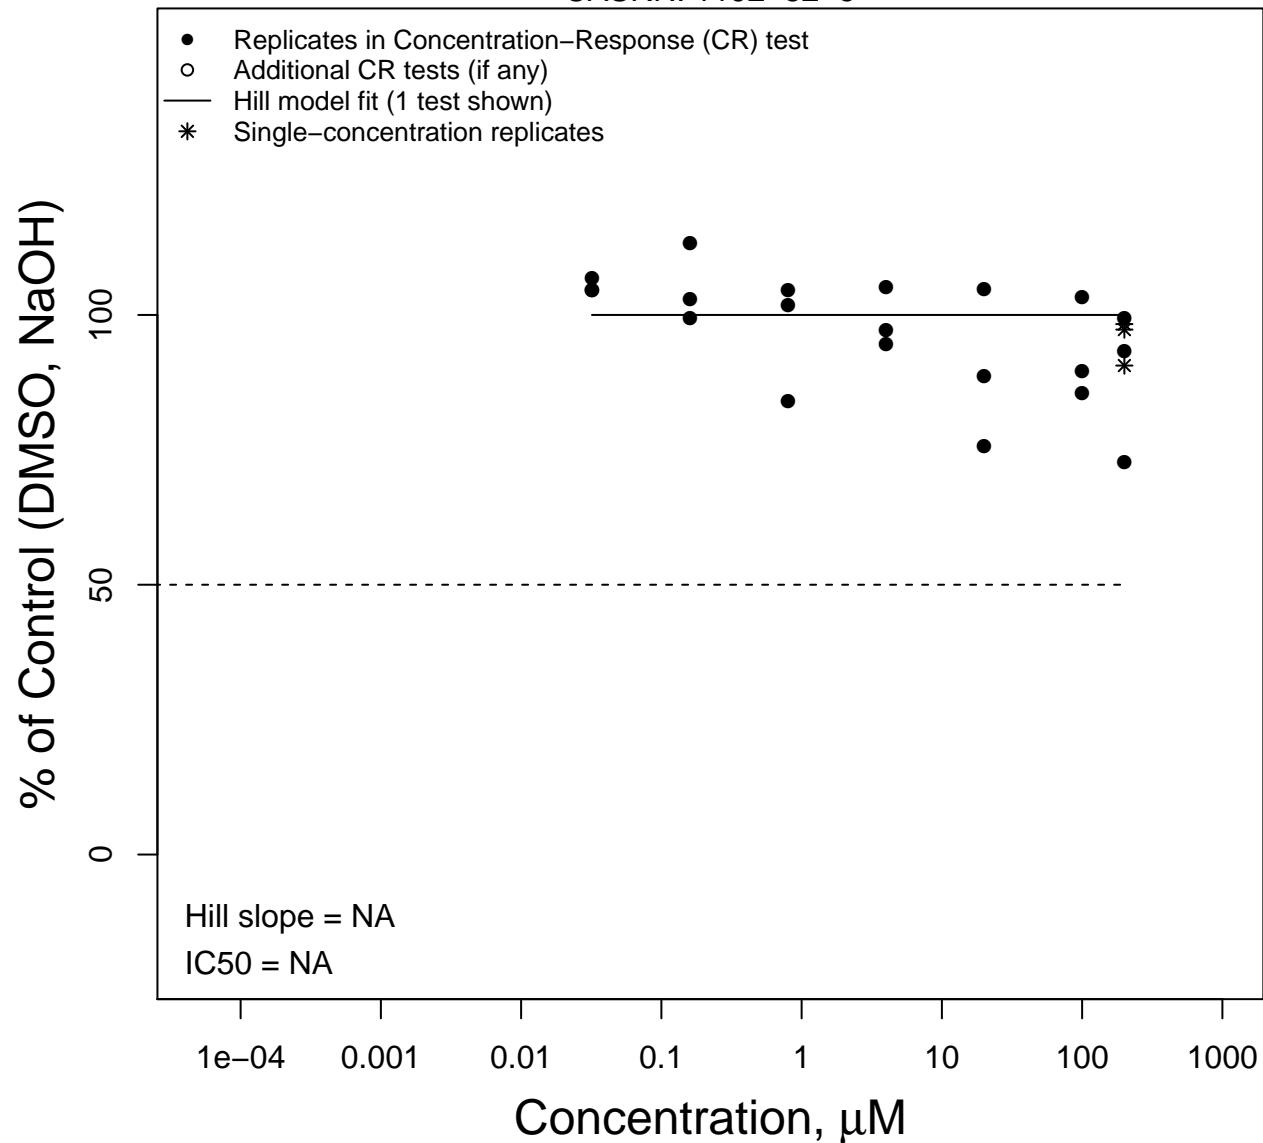

# 2,4,6-Trimethylbenzoic acid

CASRN: 480-63-7

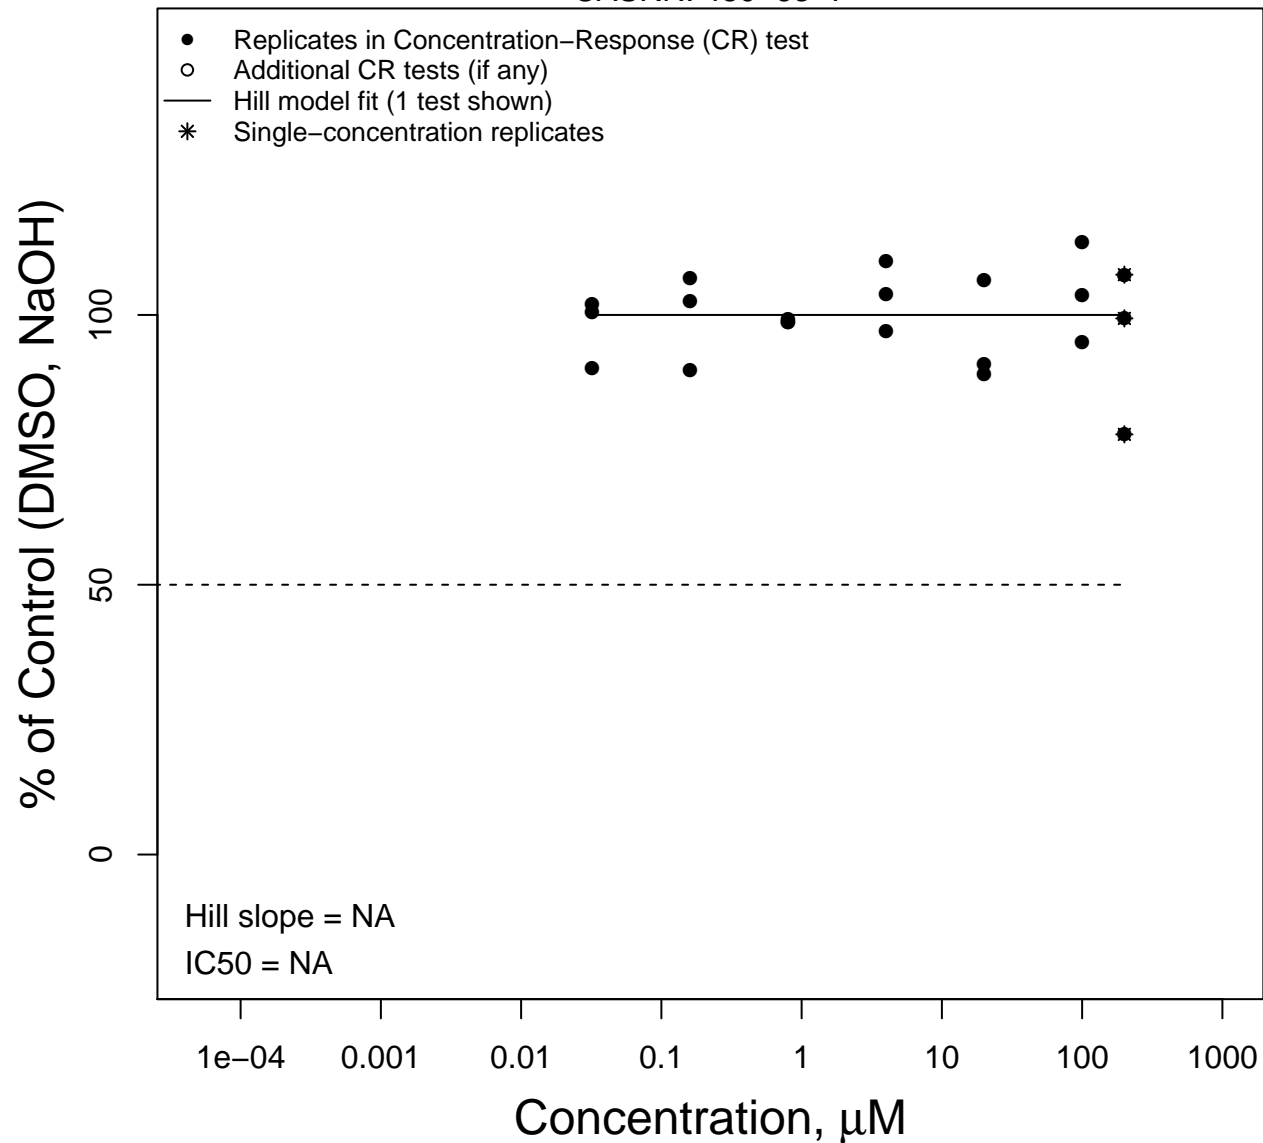

# Methyl linoleate

CASRN: 112-63-0

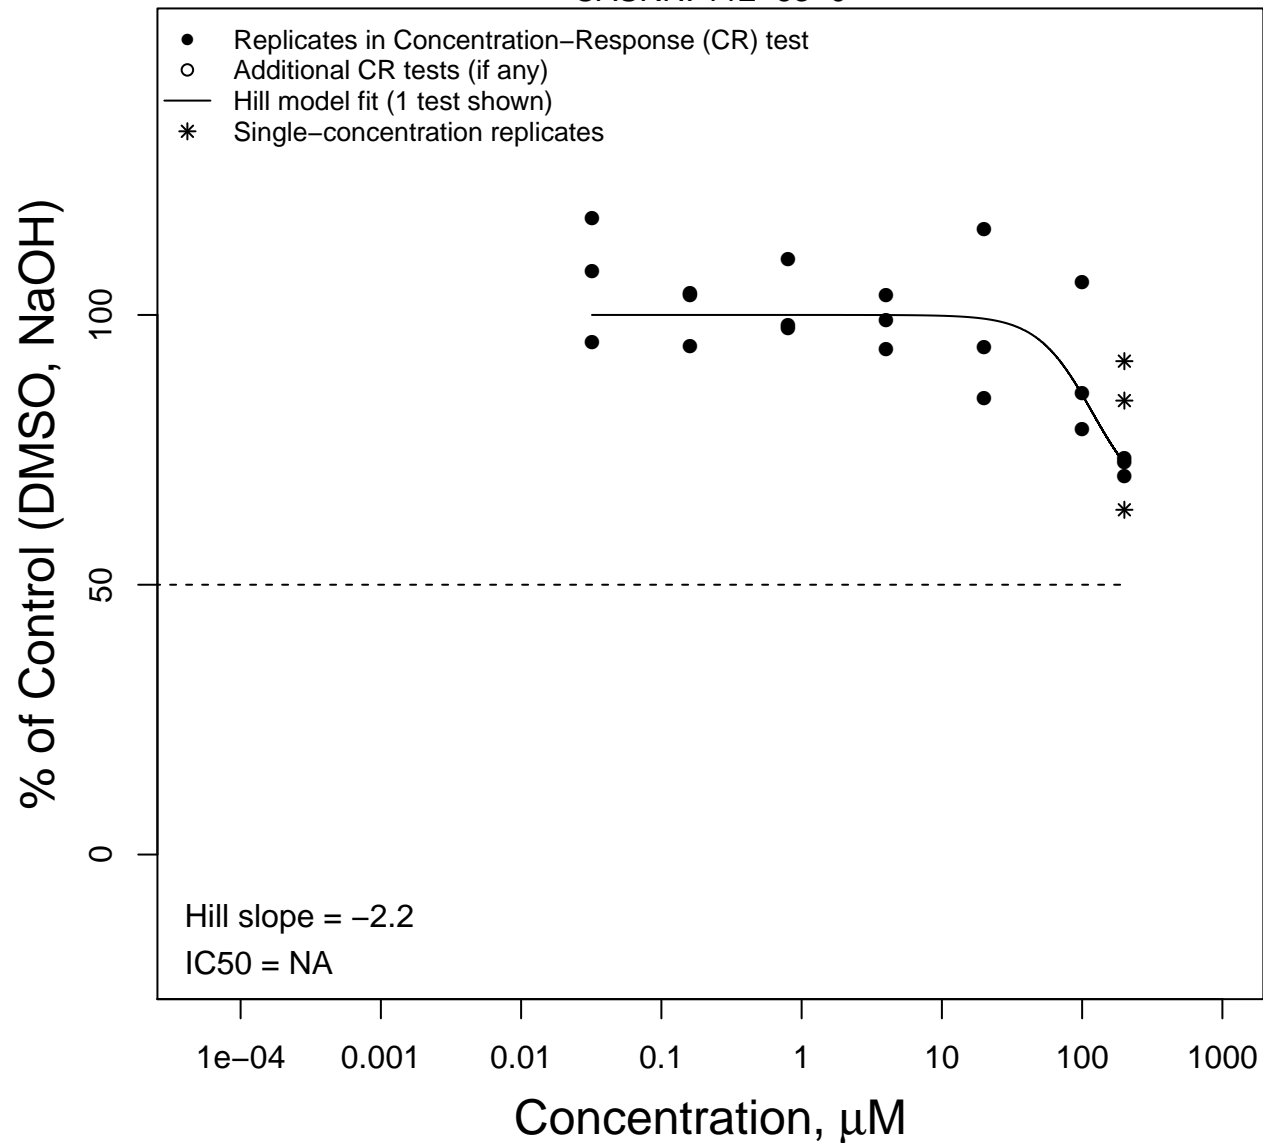

# Disodium 4,4'-bis(2-sulfostyryl)biphenyl

CASRN: 27344-41-8

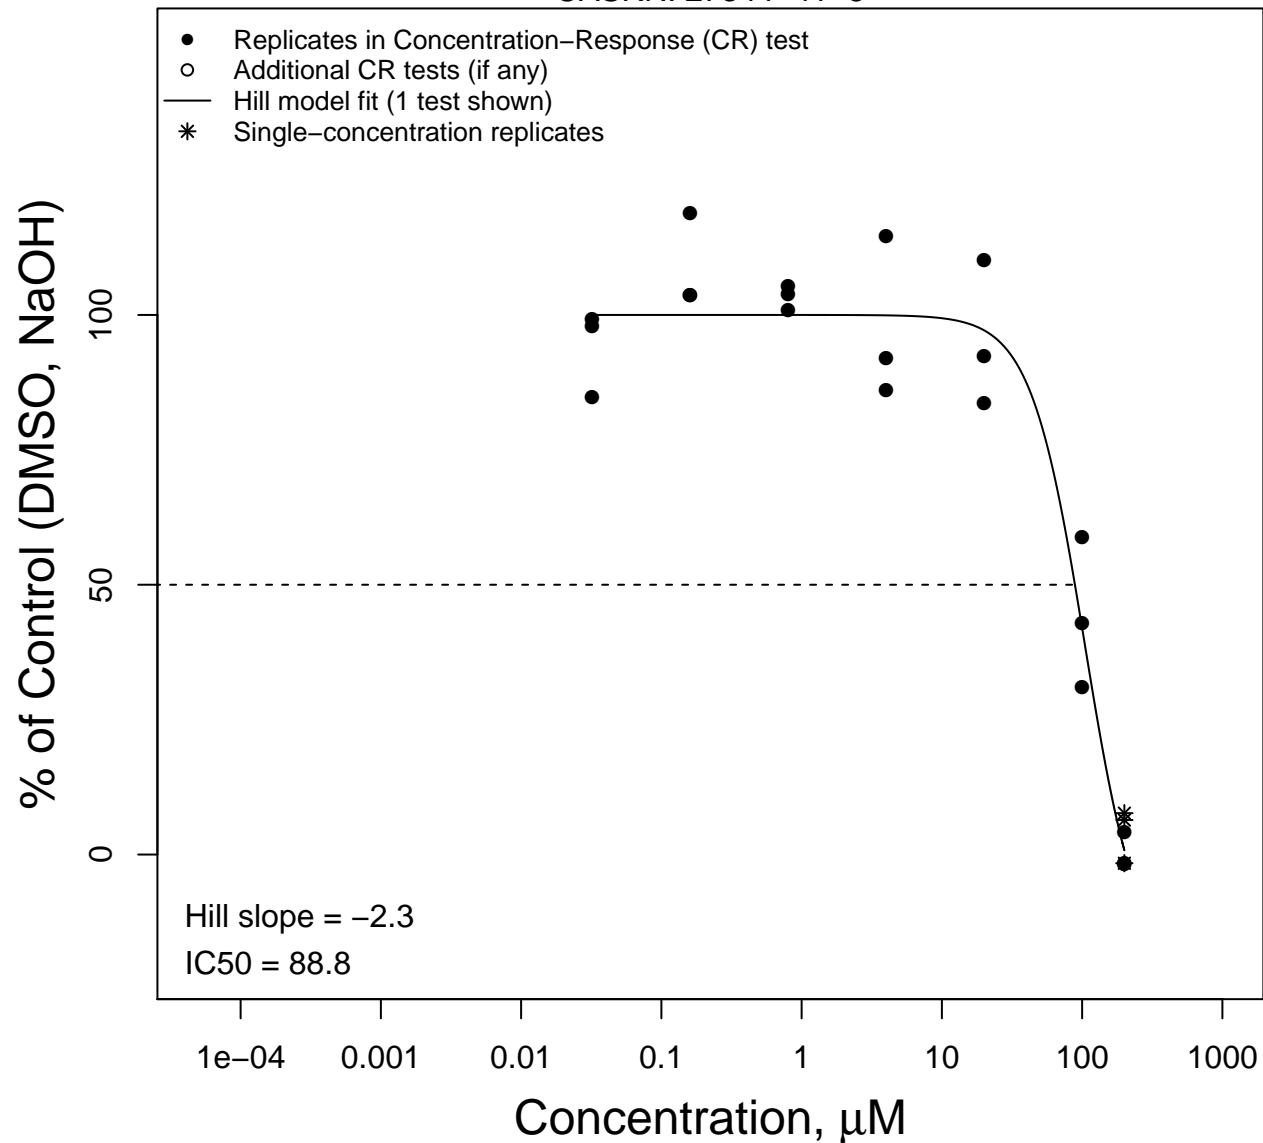

# C.I. Acid Violet 12, disodium salt

CASRN: 6625-46-3

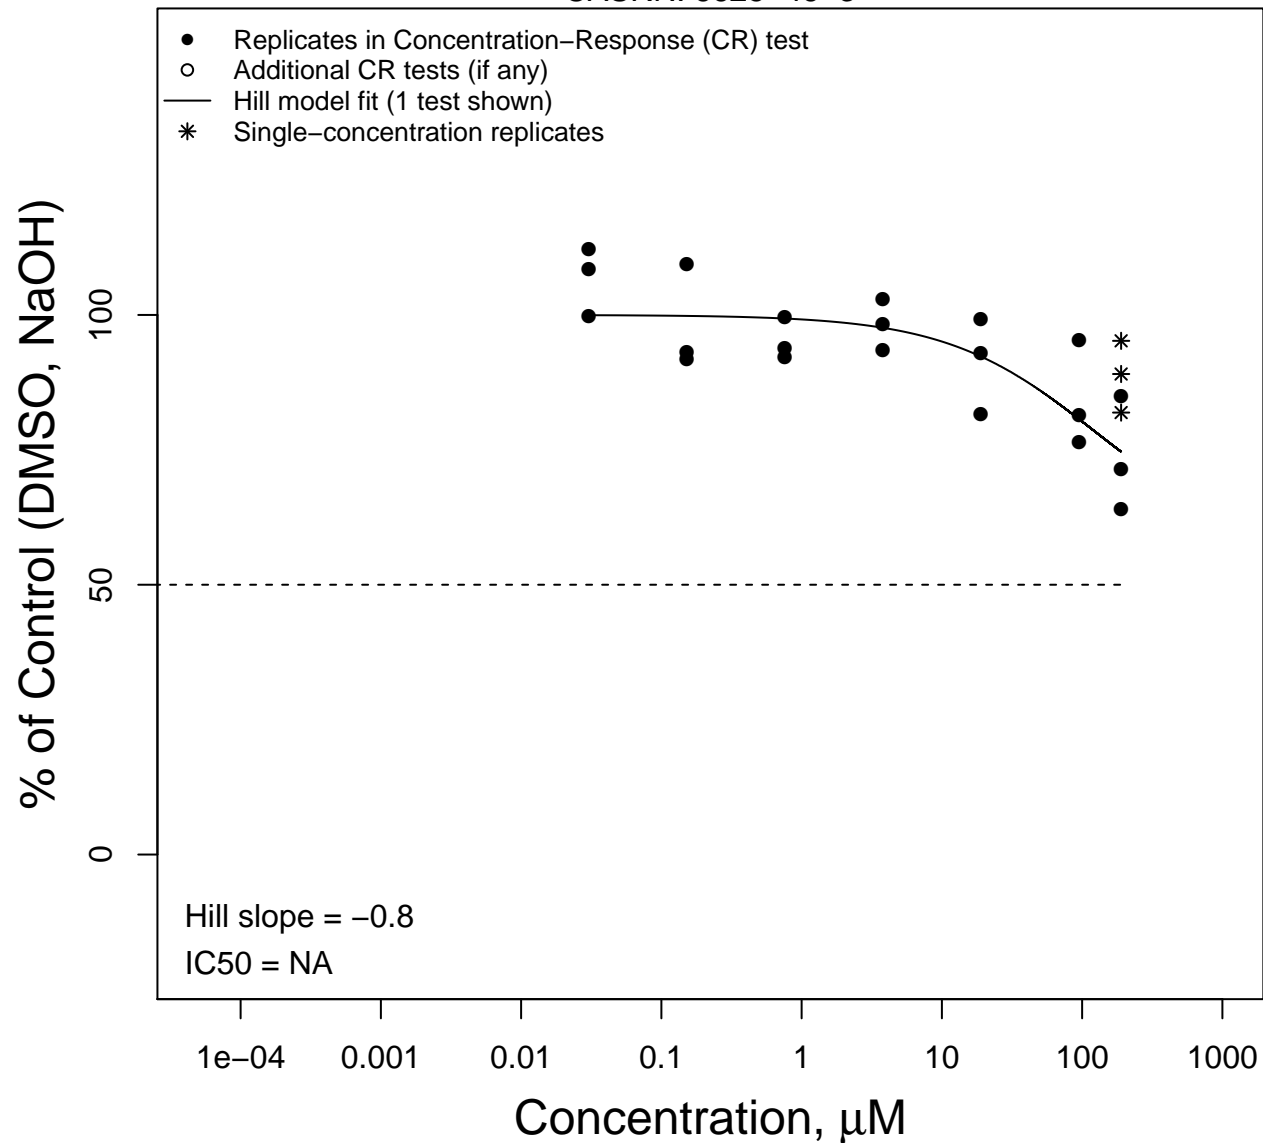



# Polyoxyethylene monooleate

CASRN: 9004-96-0

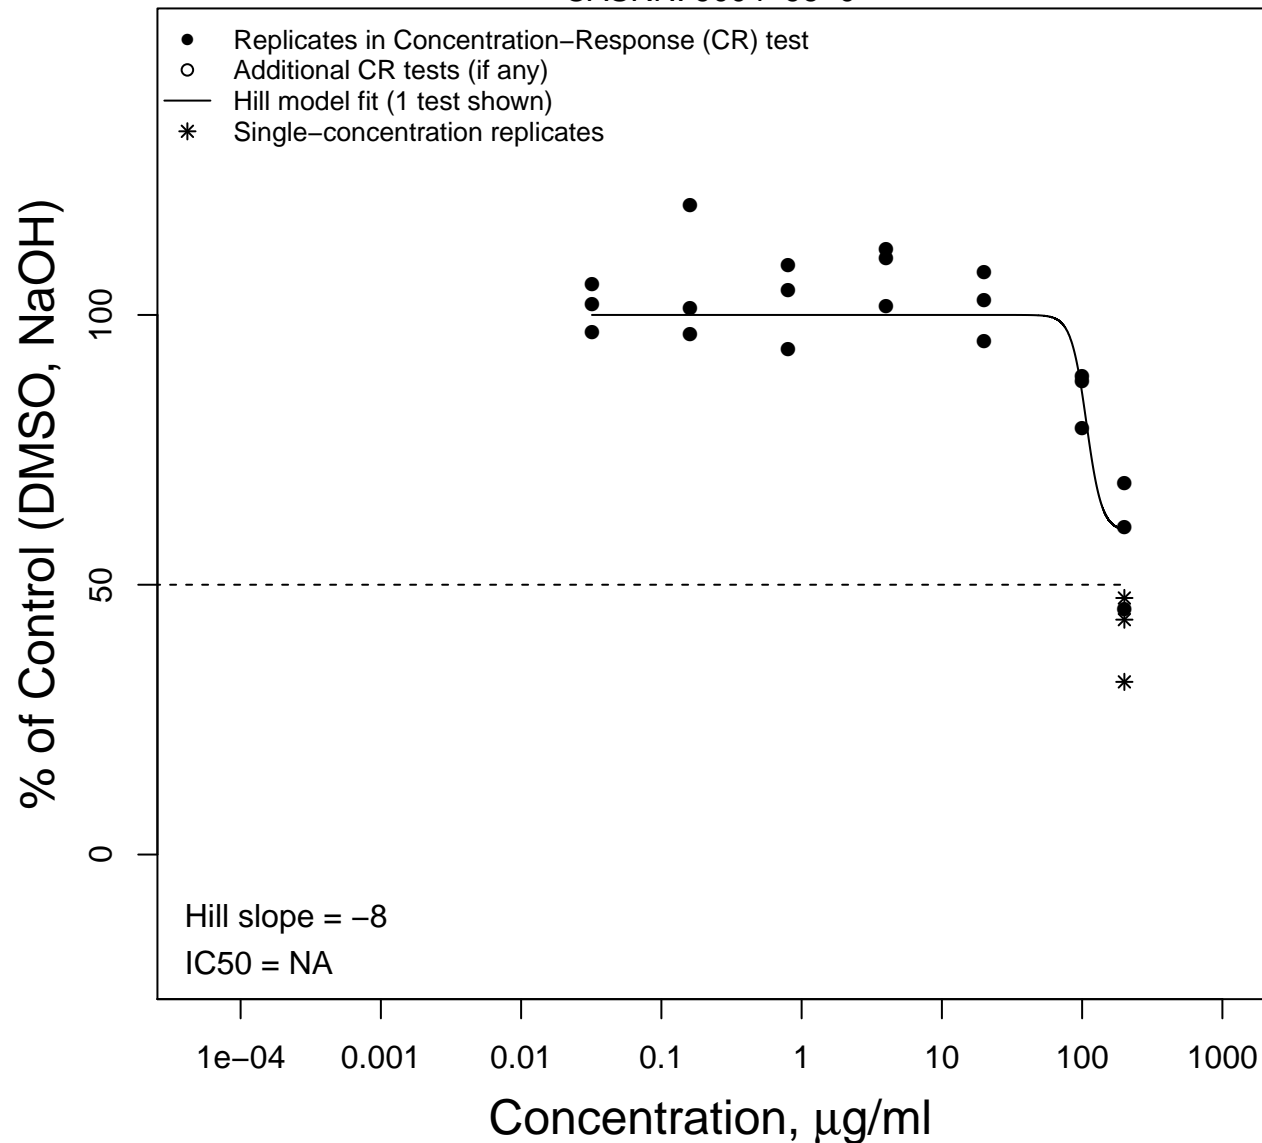

# 2,2'-Methylenebis(ethyl-6-tert-butylphenol)

CASRN: 88-24-4

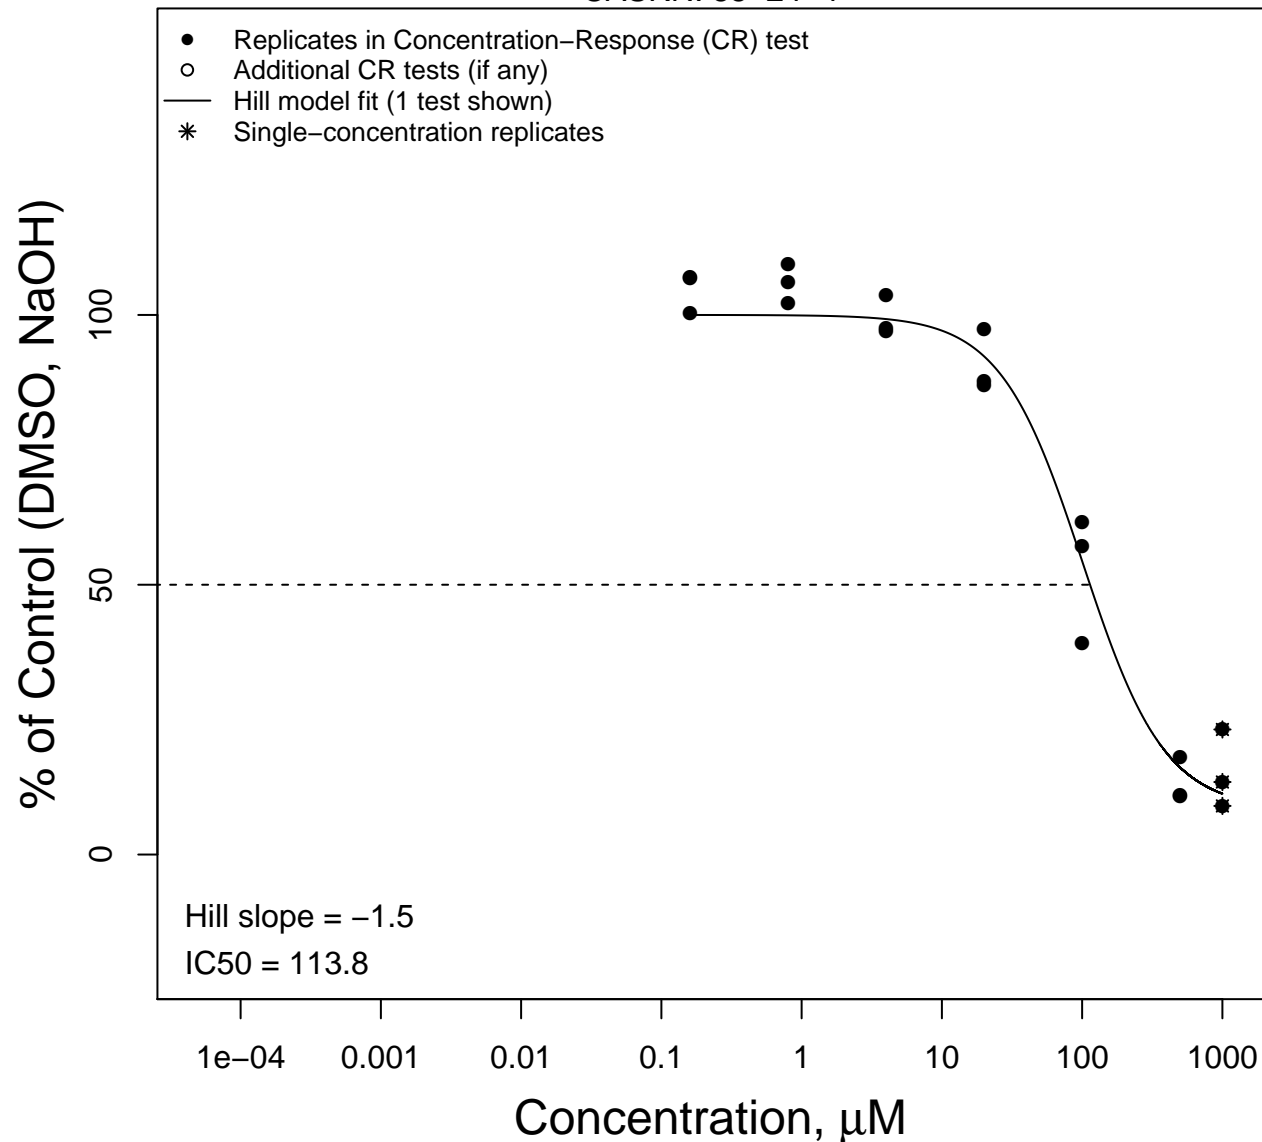

# C.I. Acid Red 114

CASRN: 6459-94-5

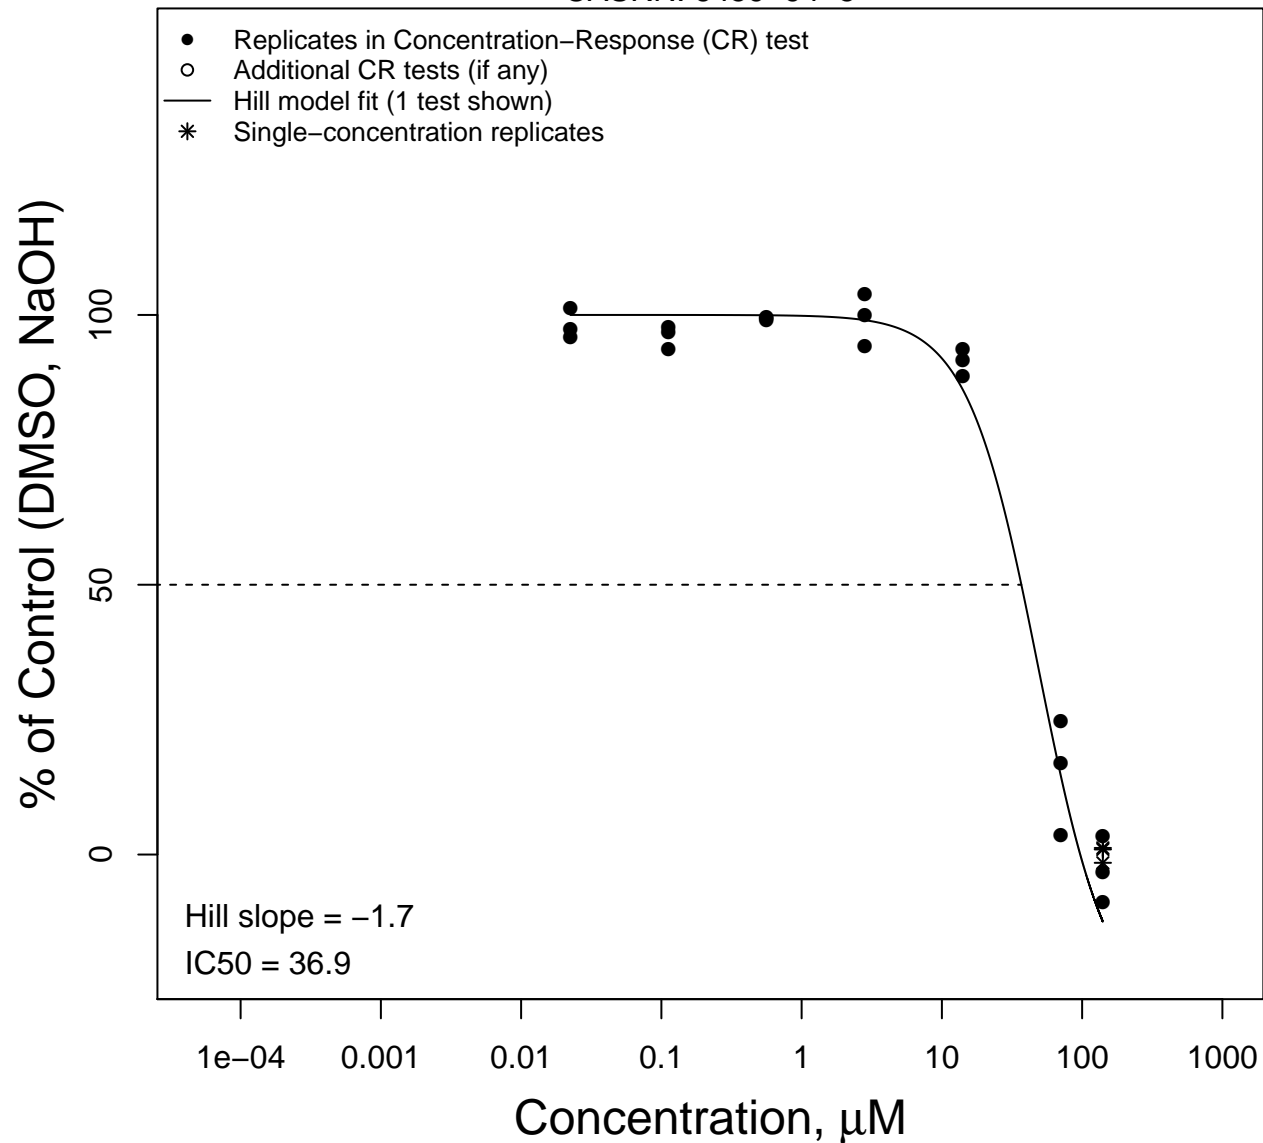

# Chlorhexidine diacetate

CASRN: 56-95-1

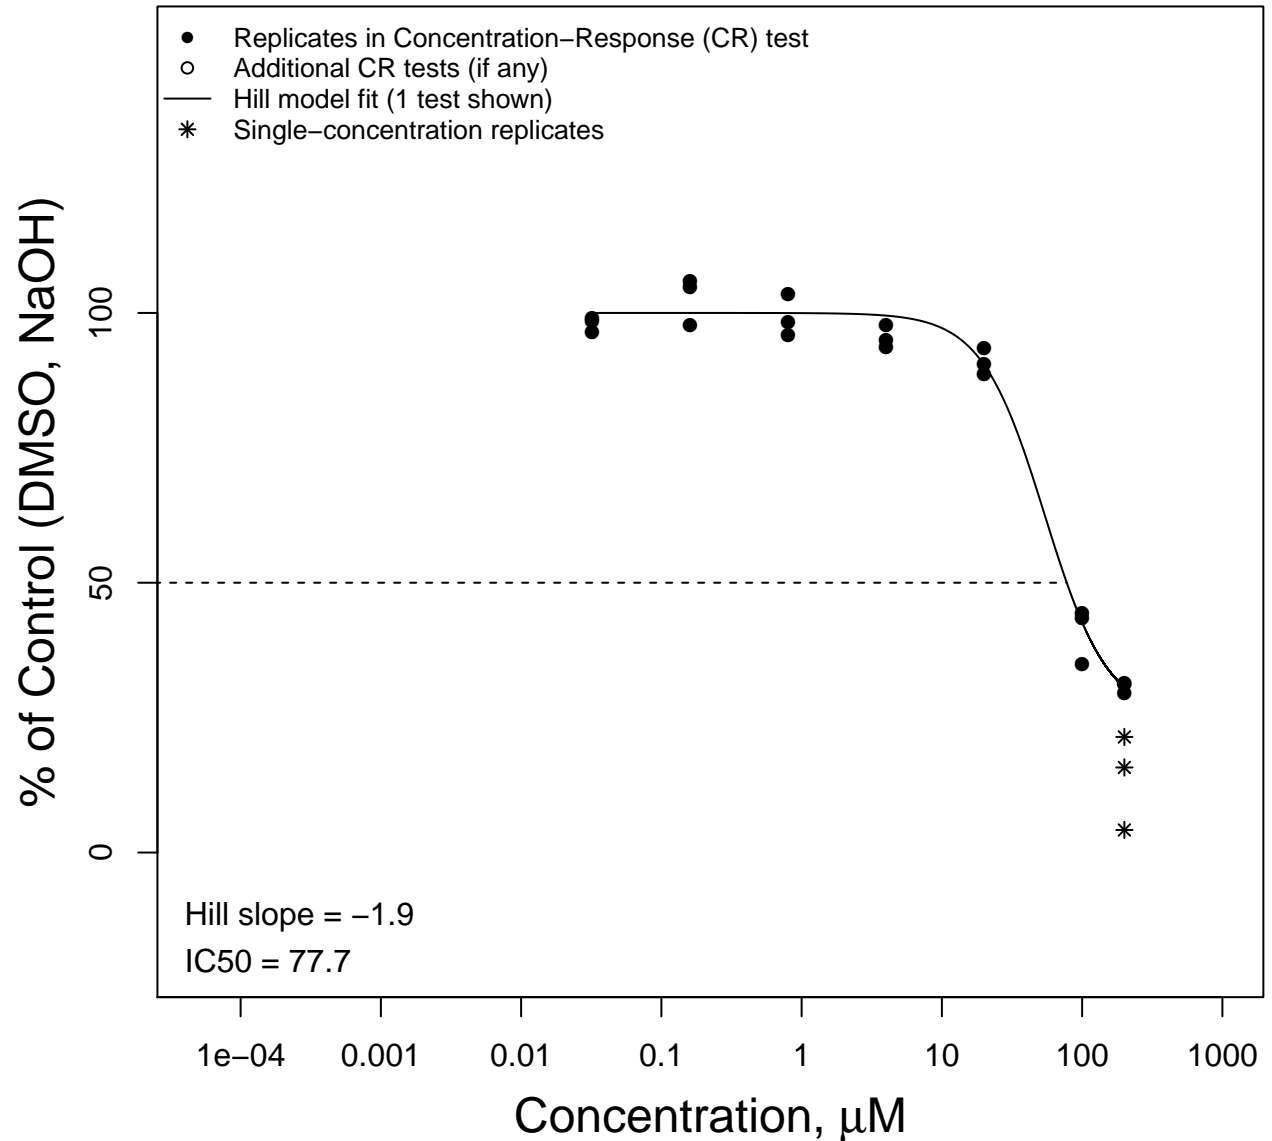

# Acid Orange 156

CASRN: 68555-86-2

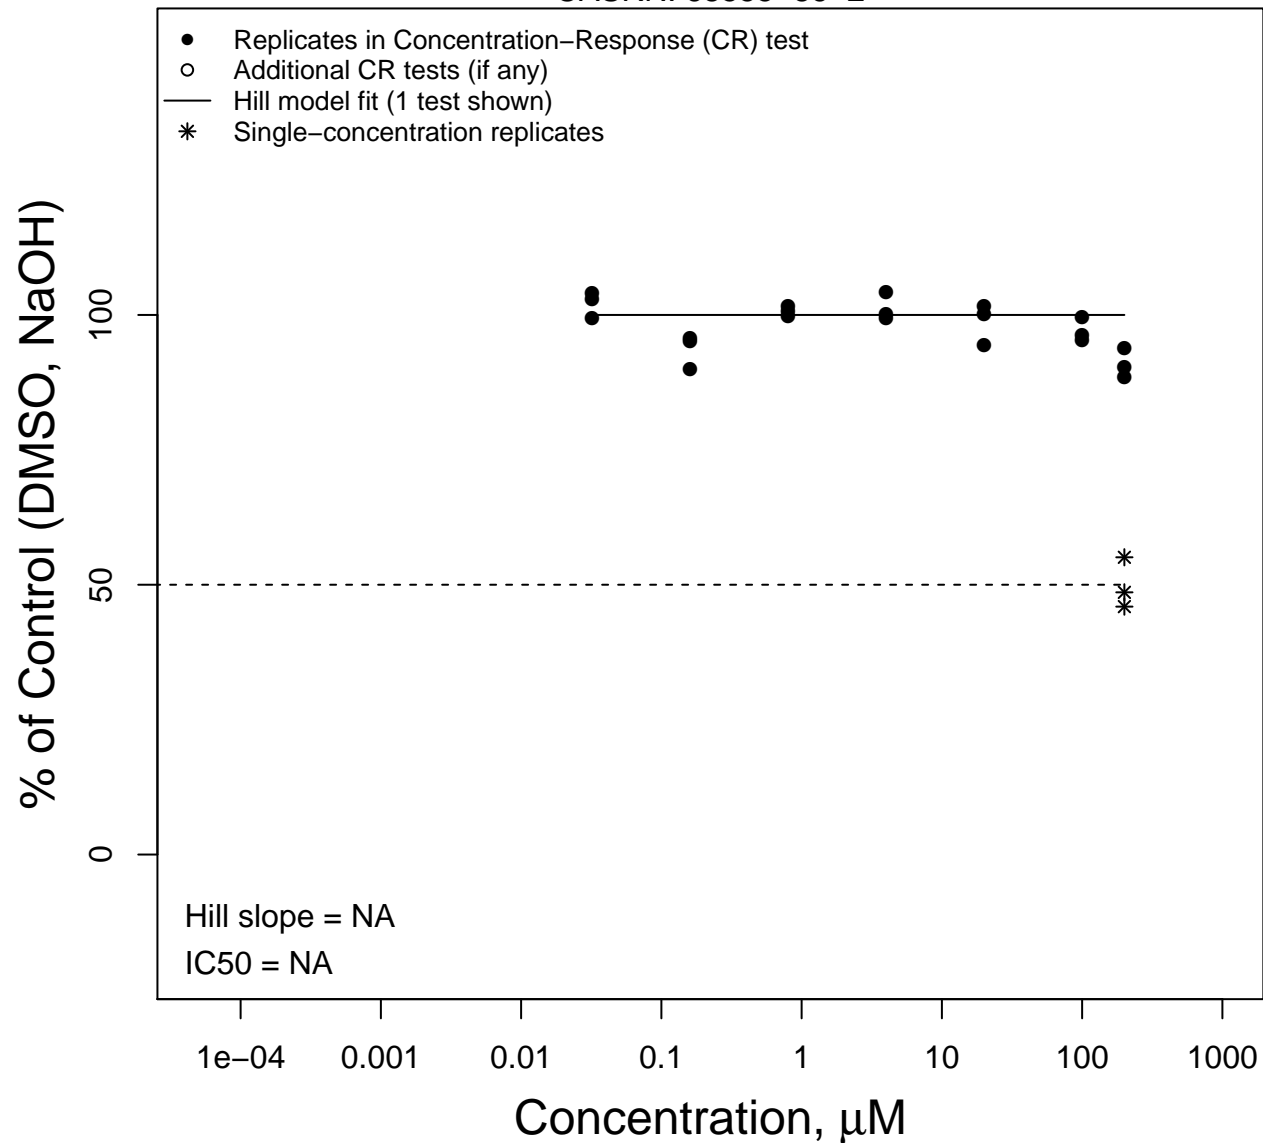

# Riboflavin

CASRN: 83-88-5

- Replicates in Concentration-Response (CR) test
- Additional CR tests (if any)
- Hill model fit (1 test shown)
- \* Single-concentration replicates

% of Control (DMSO, NaOH)

100

50

0

Hill slope = -1.9

IC50 = NA

1e-04

0.001

0.01

0.1

1

10

100

1000

Concentration,  $\mu\text{M}$

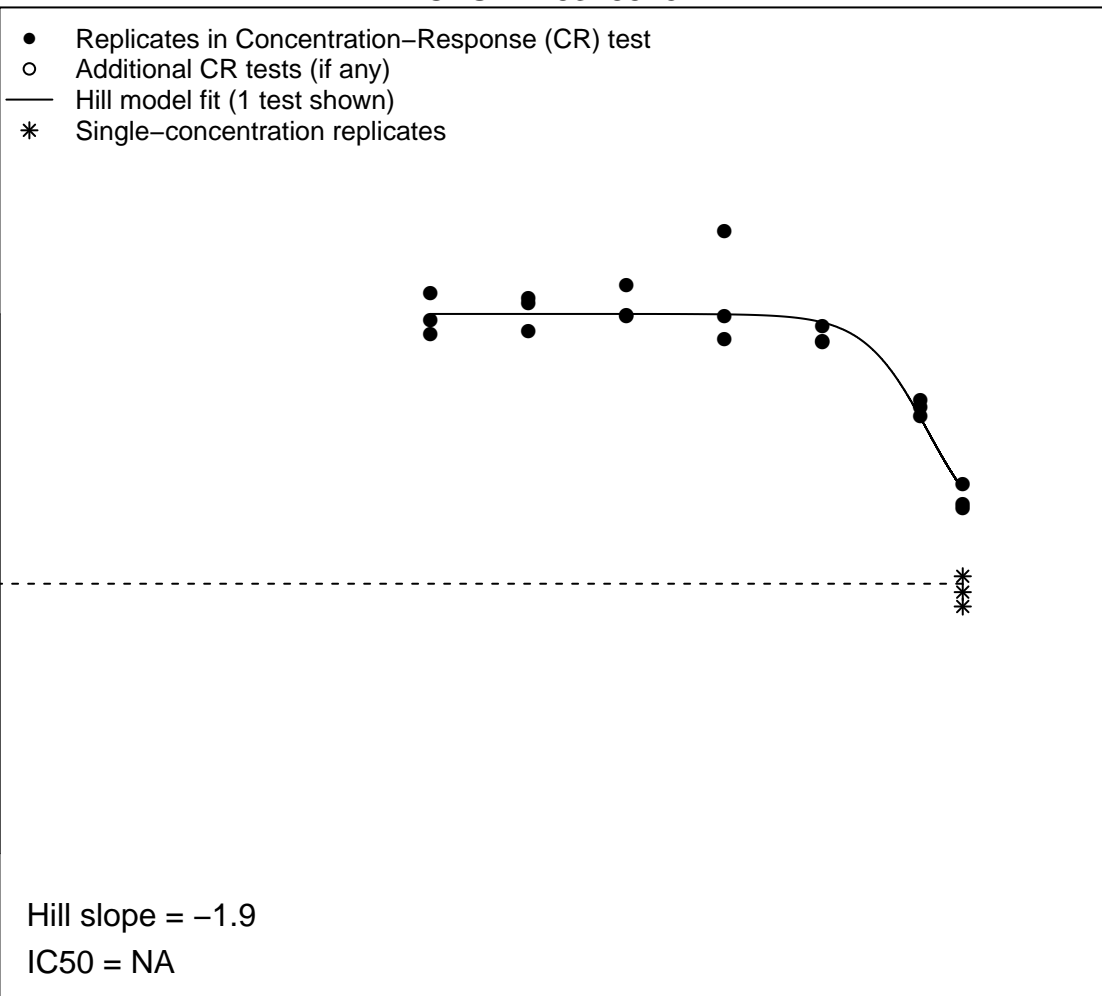

# Nonanal

CASRN: 124-19-6

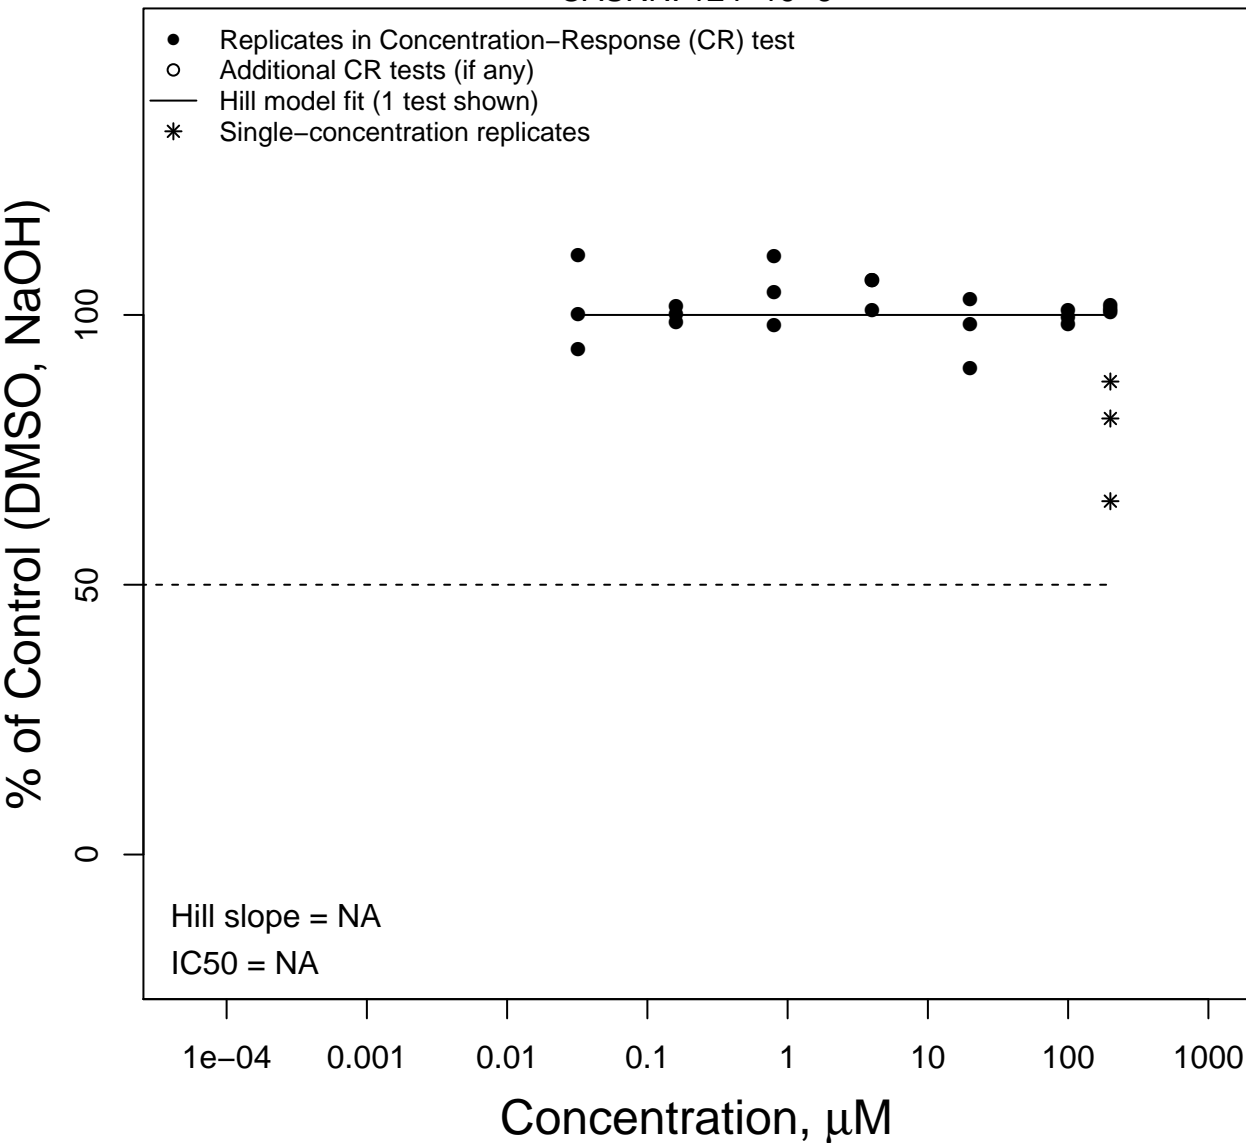

# 4-Propylphenol

CASRN: 645-56-7

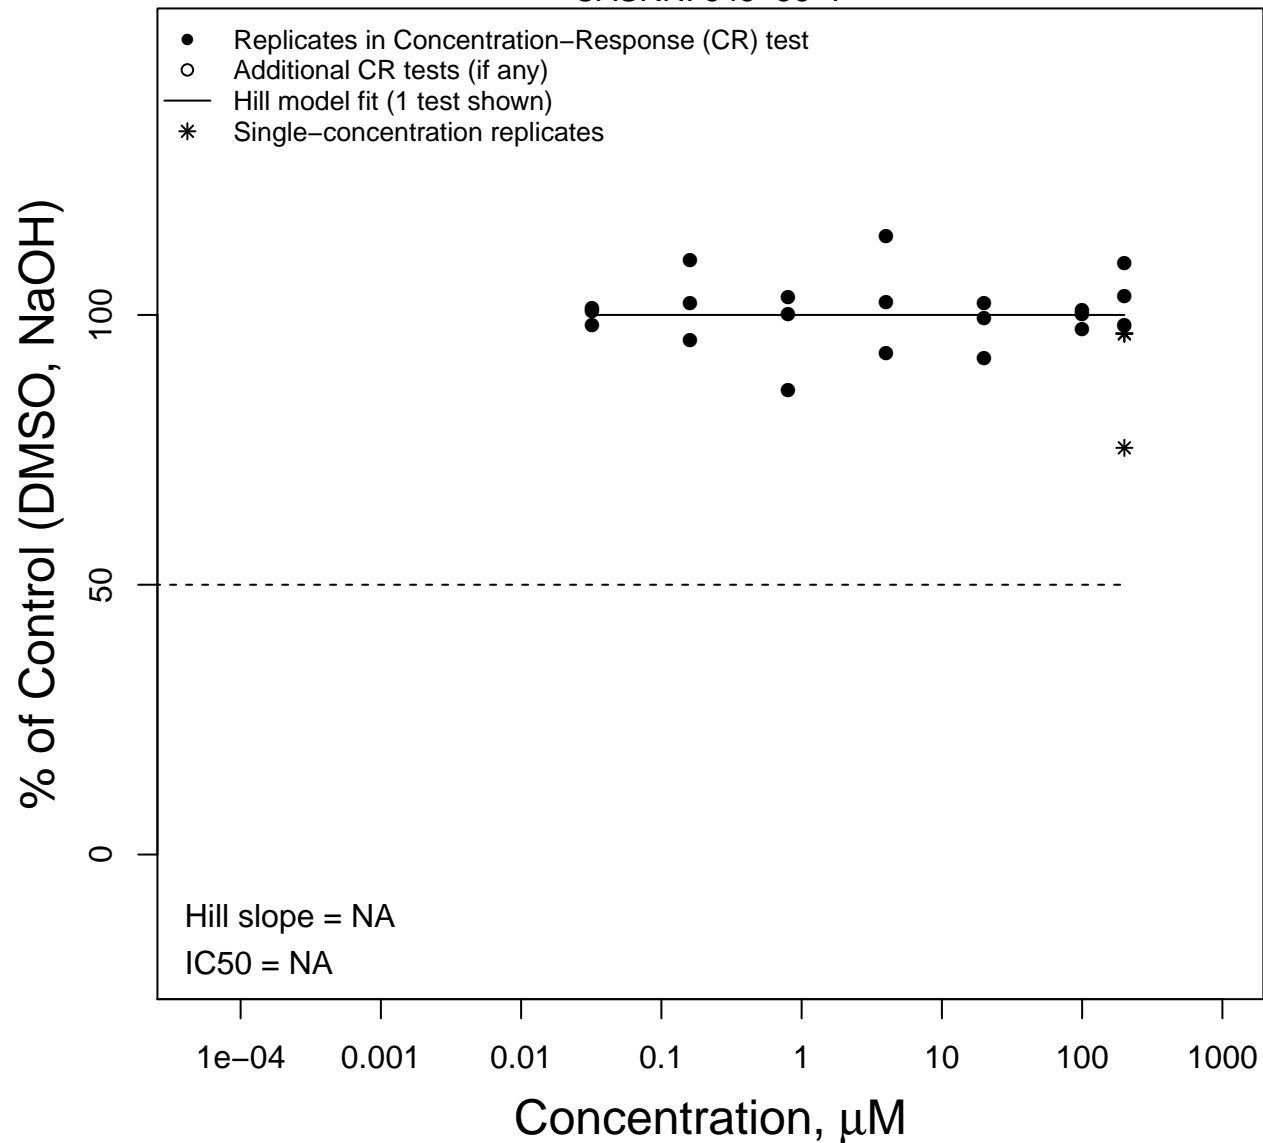



# gamma-Caprolactone

CASRN: 695-06-7

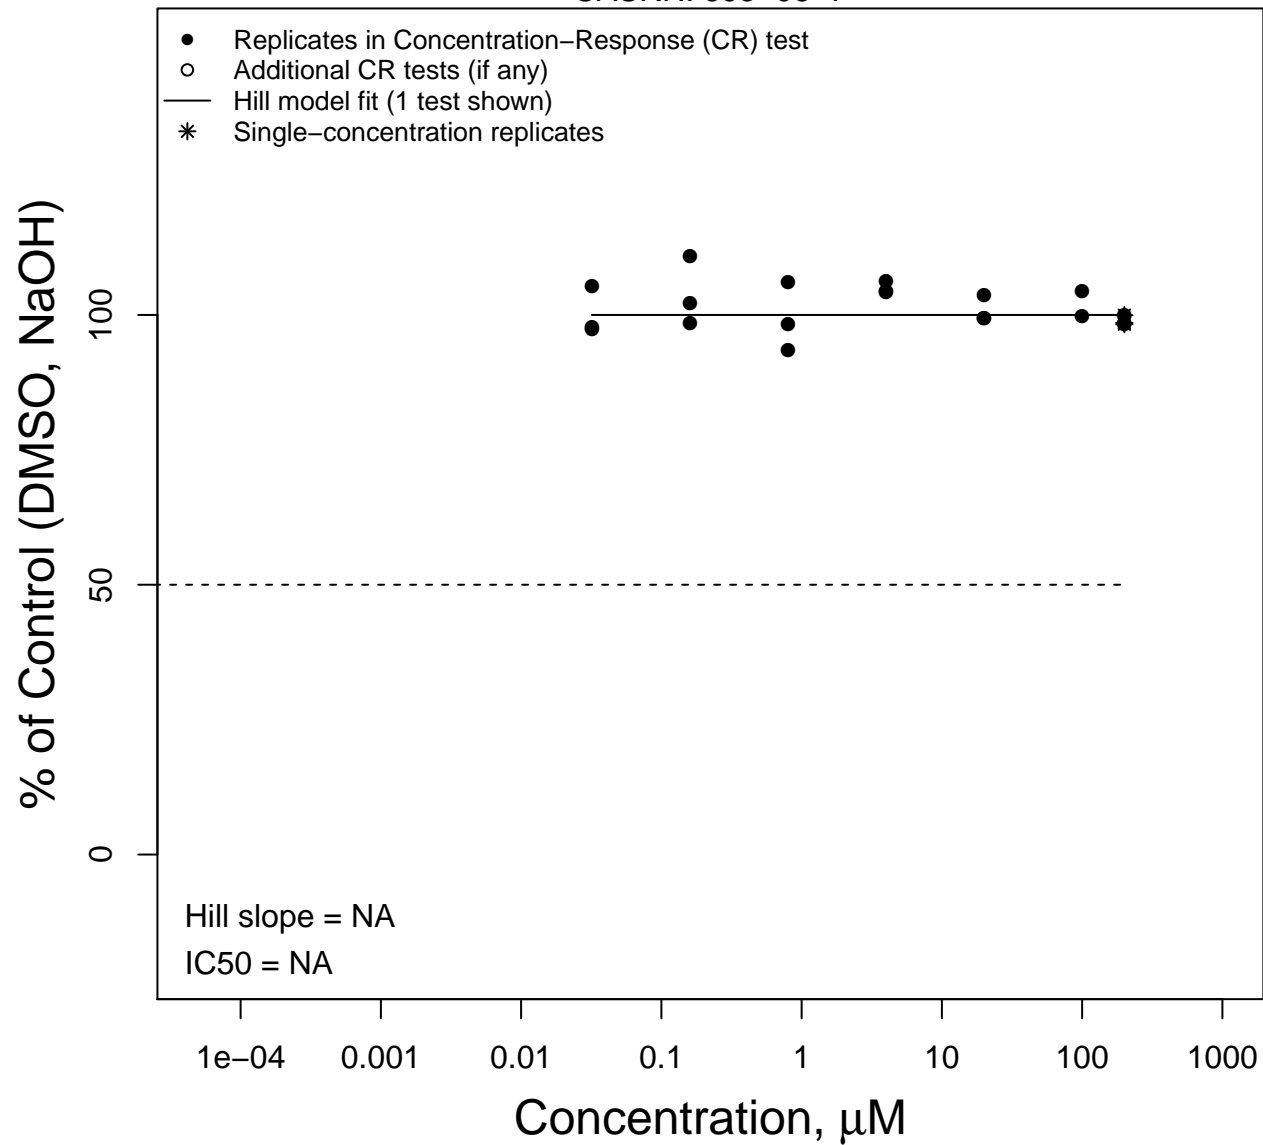

# Dimethylaniline

CASRN: 1300-73-8

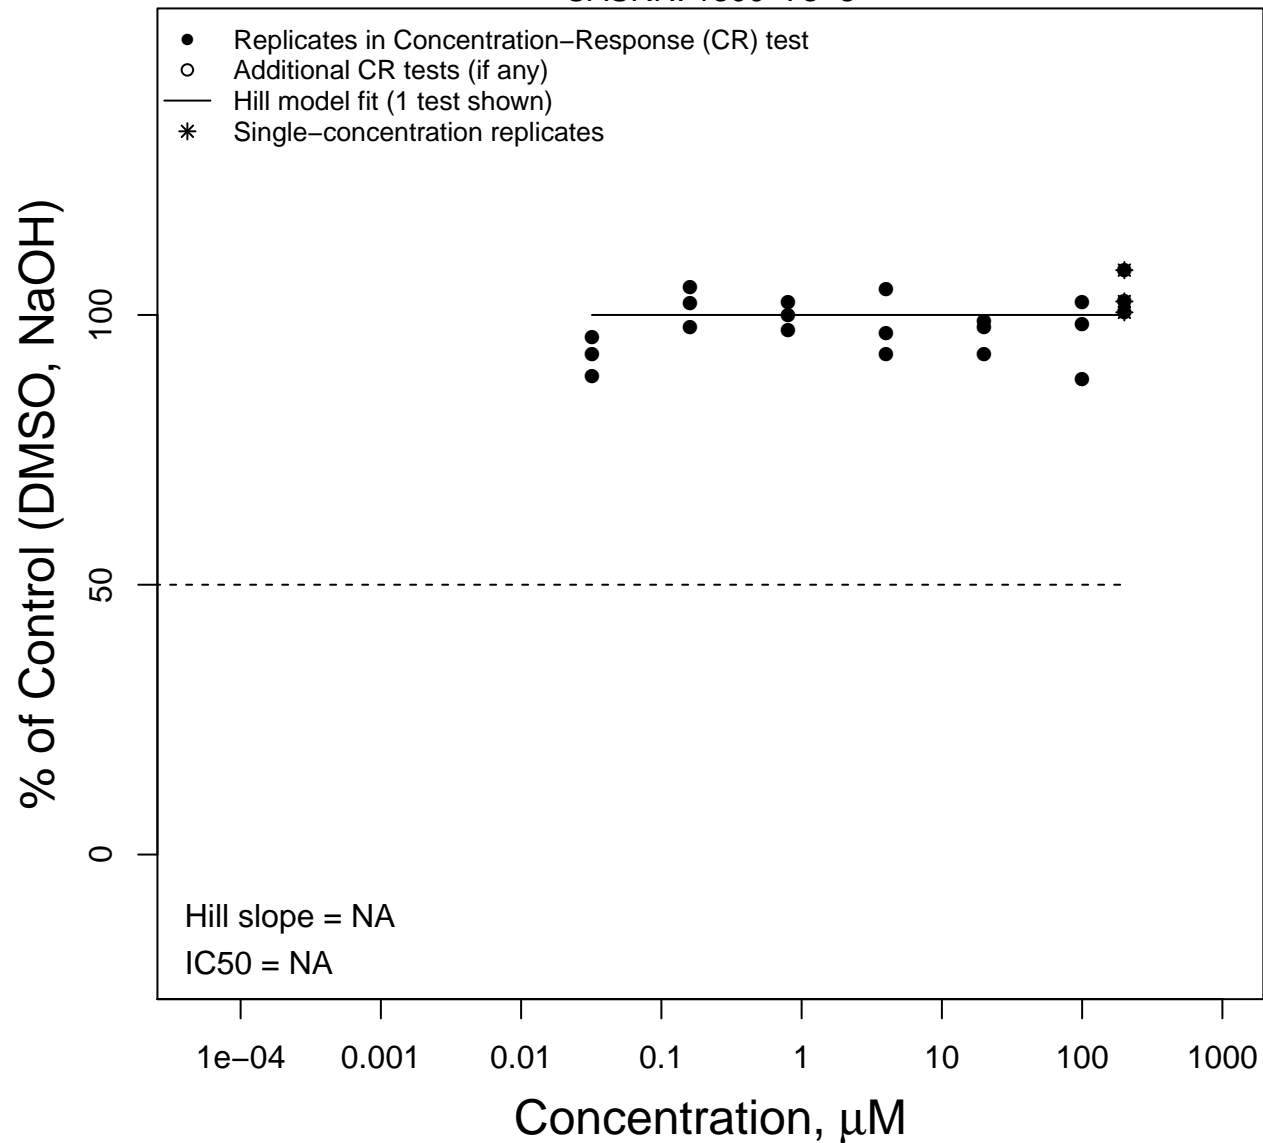

# 1,4-Benzenediamine

CASRN: 106-50-3

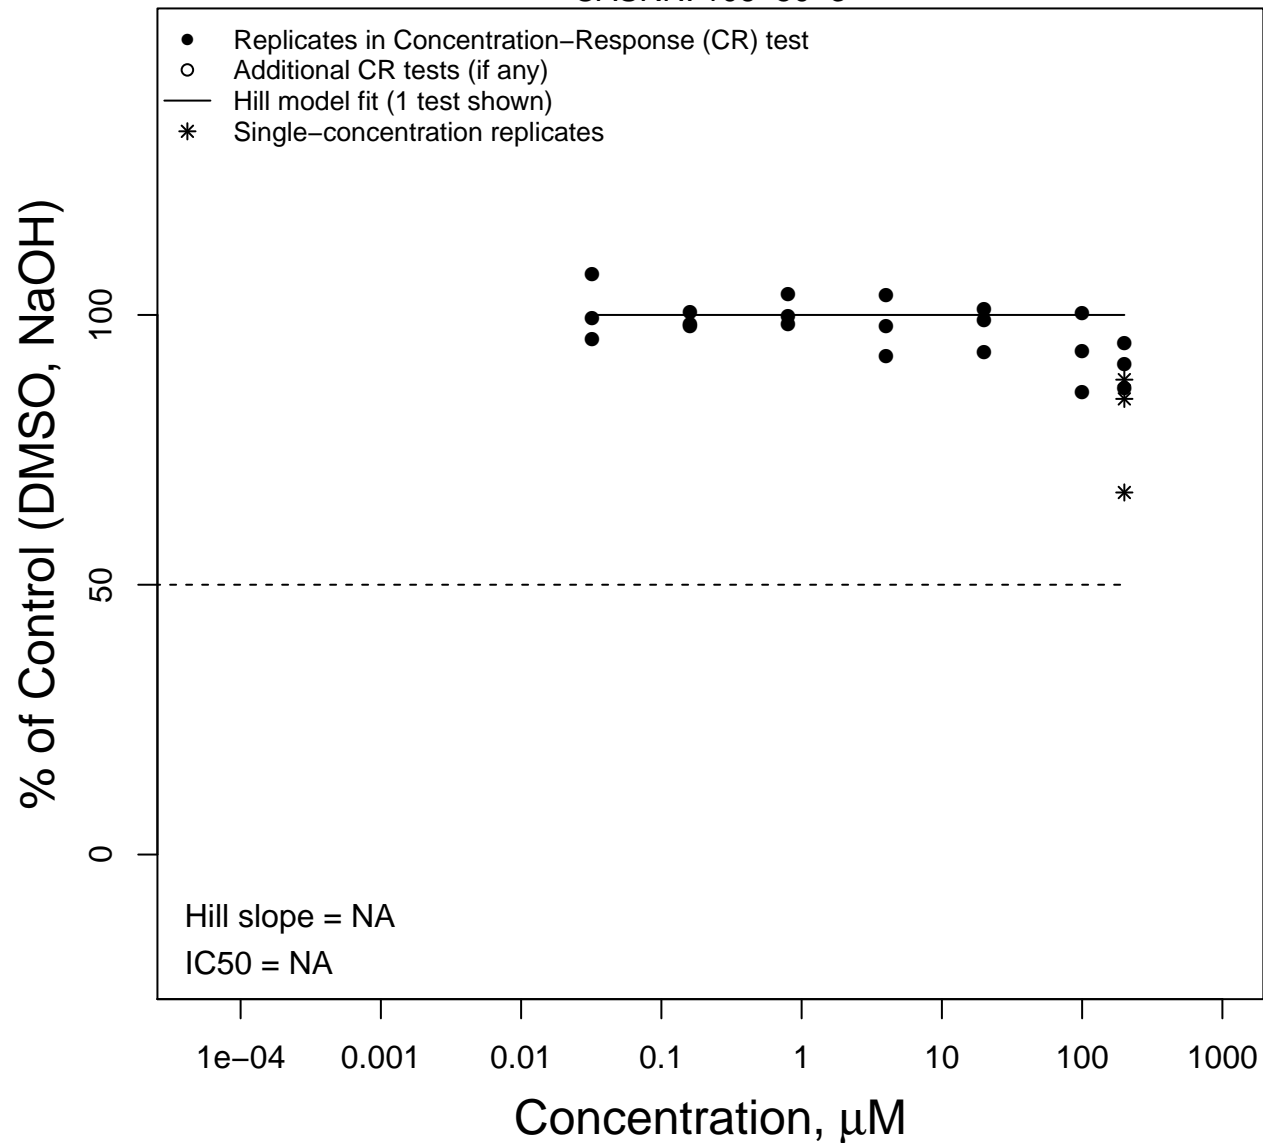

Myristyltrimethylammonium chloride N,N,N-Trimethyltetradecan-1-aminium chloride

CASRN: 4574-04-3

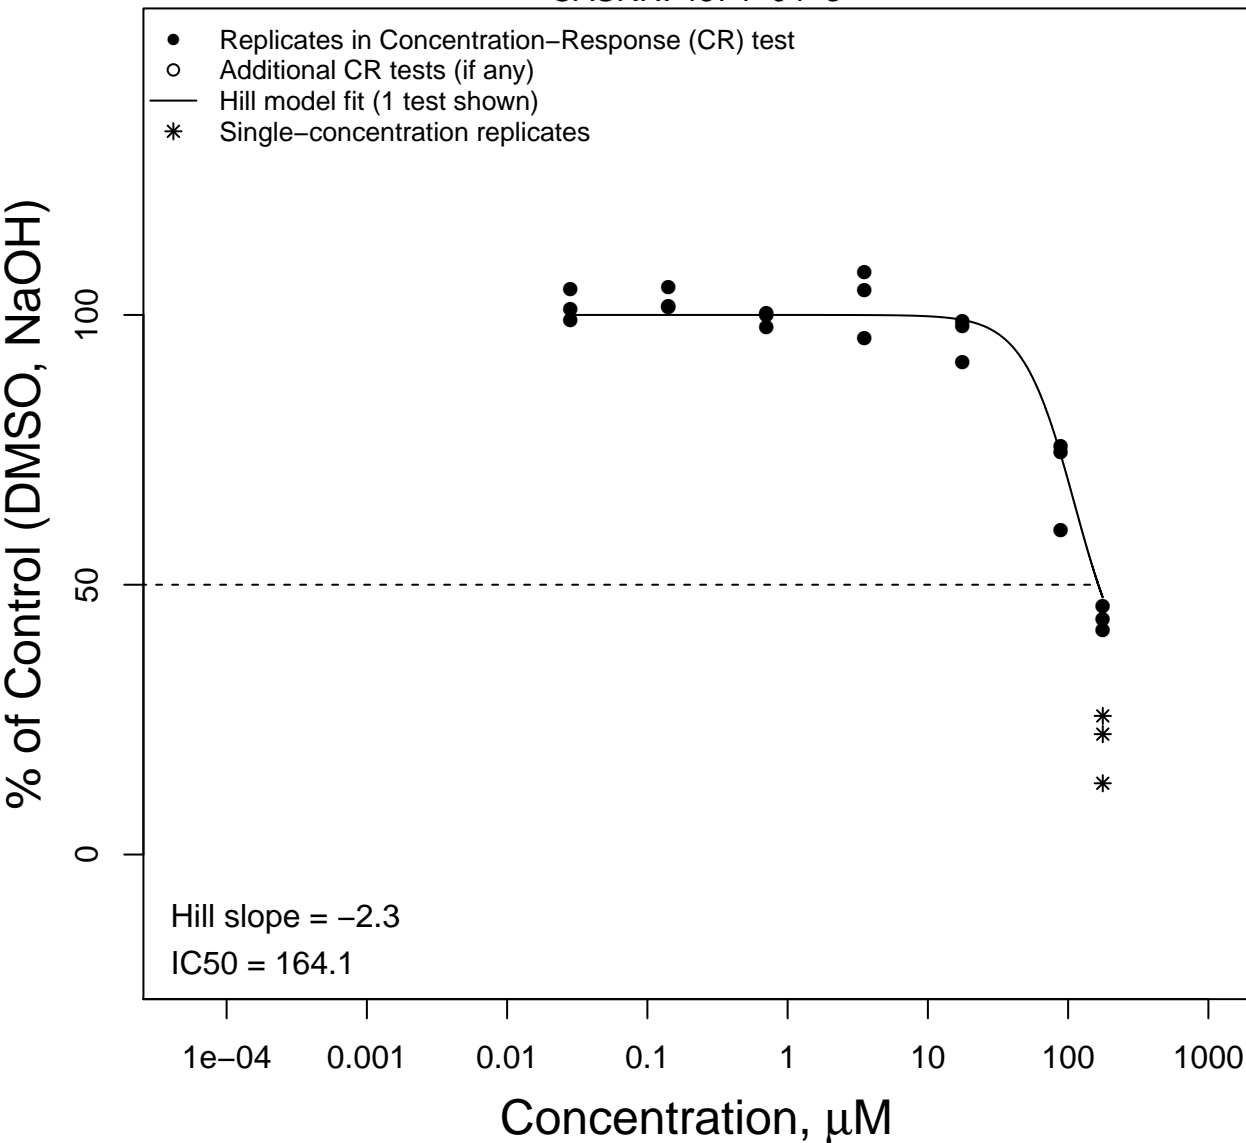

# C.I. Disperse Orange 37

CASRN: 13301-61-6

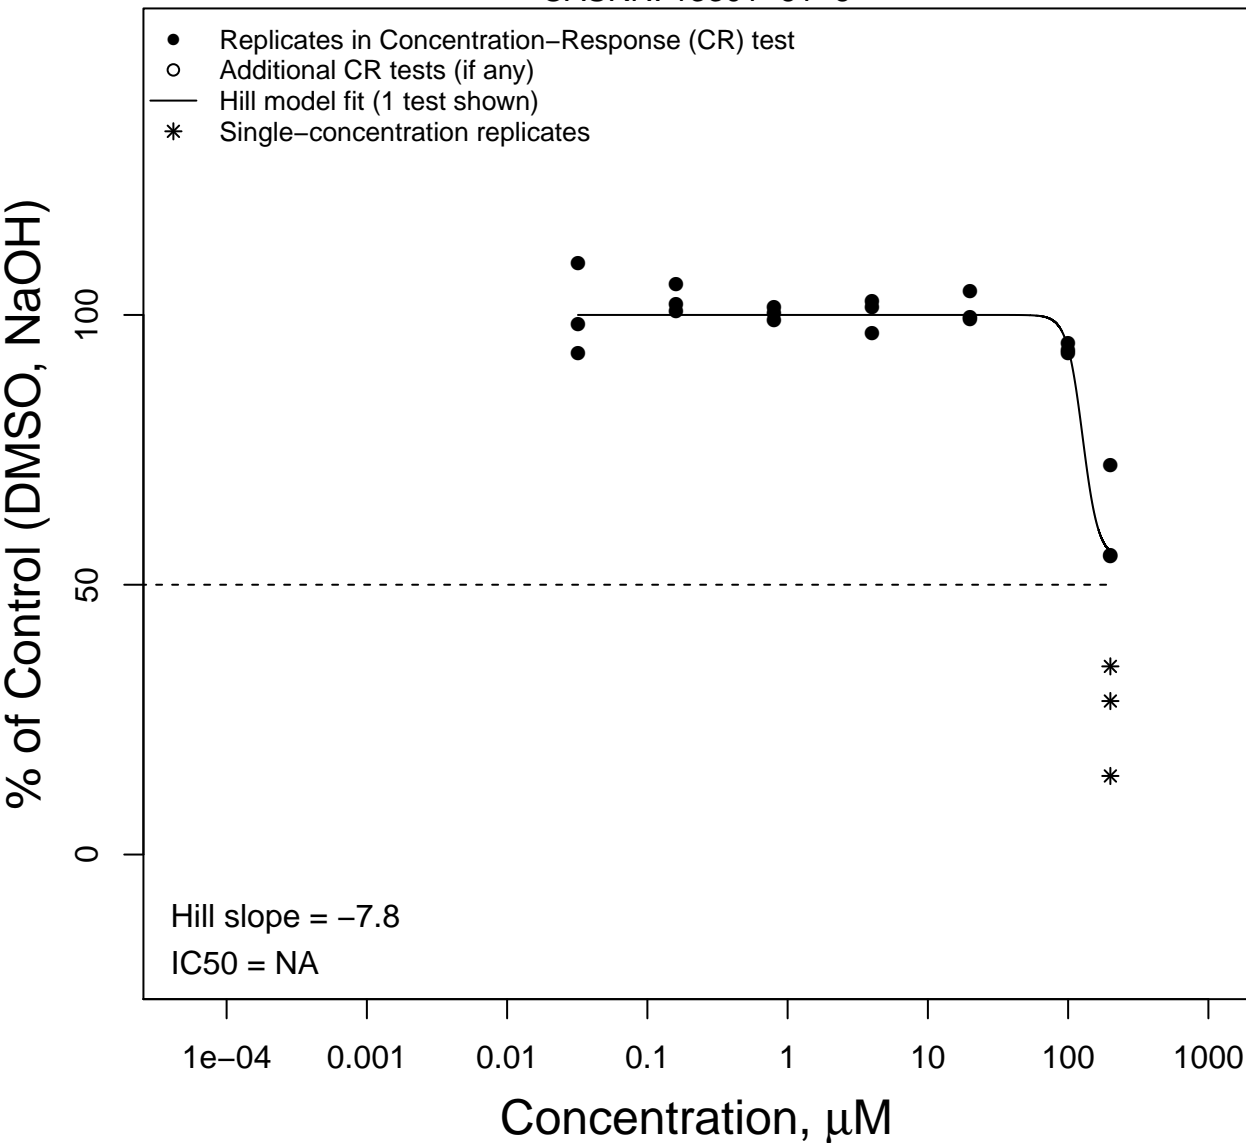

# 5-Chlorosalicylanilide

CASRN: 4638-48-6

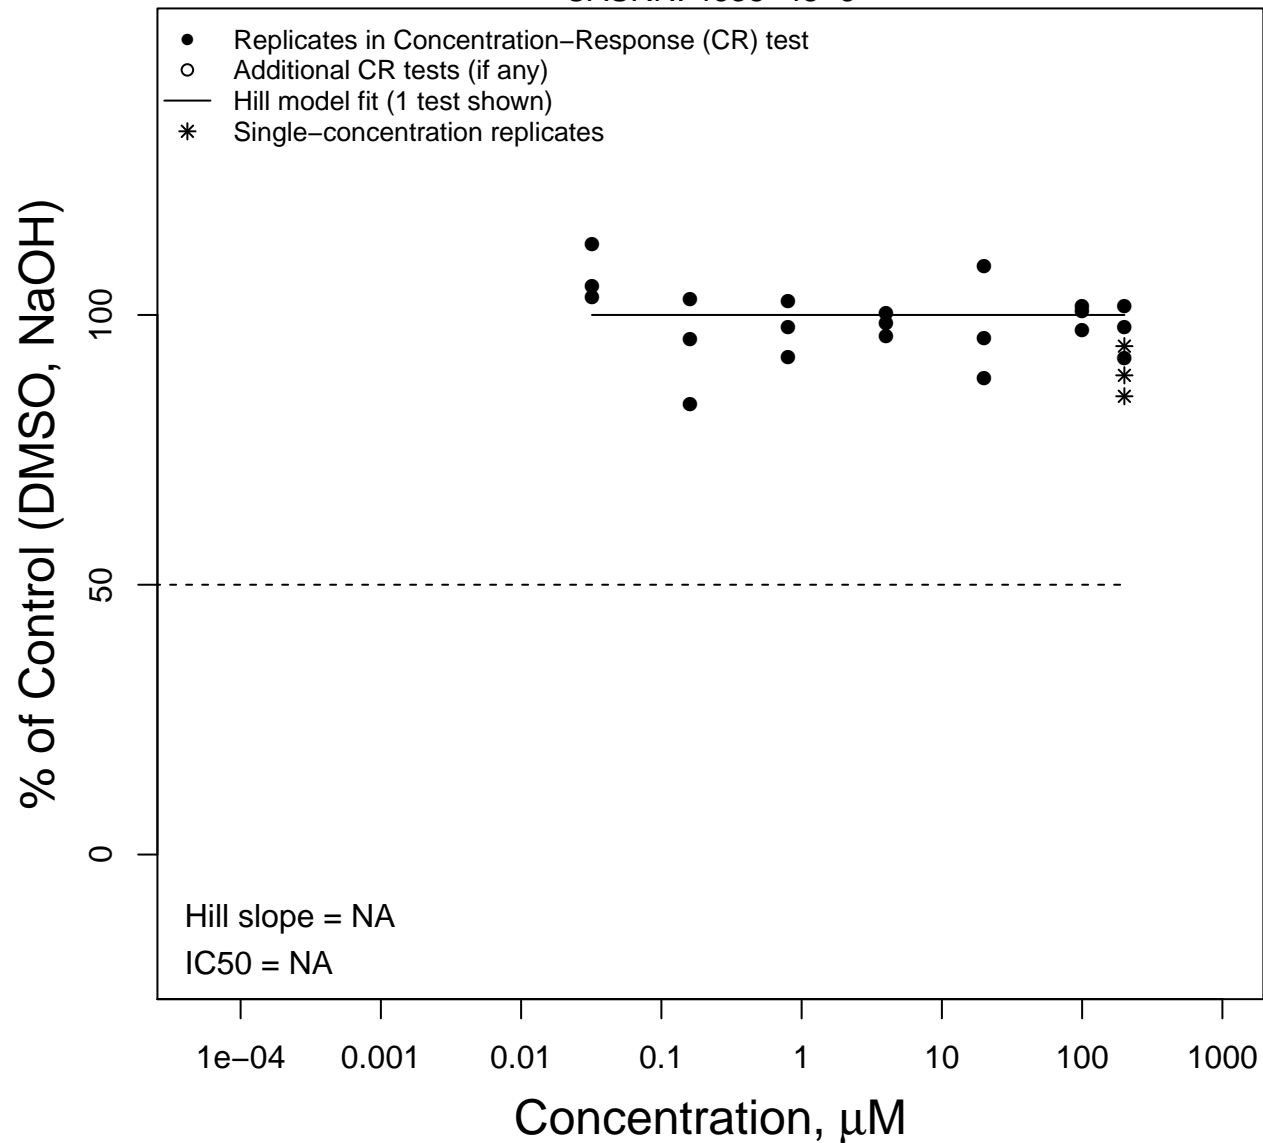

# Tributyltetradecylphosphonium chloride

CASRN: 81741-28-8

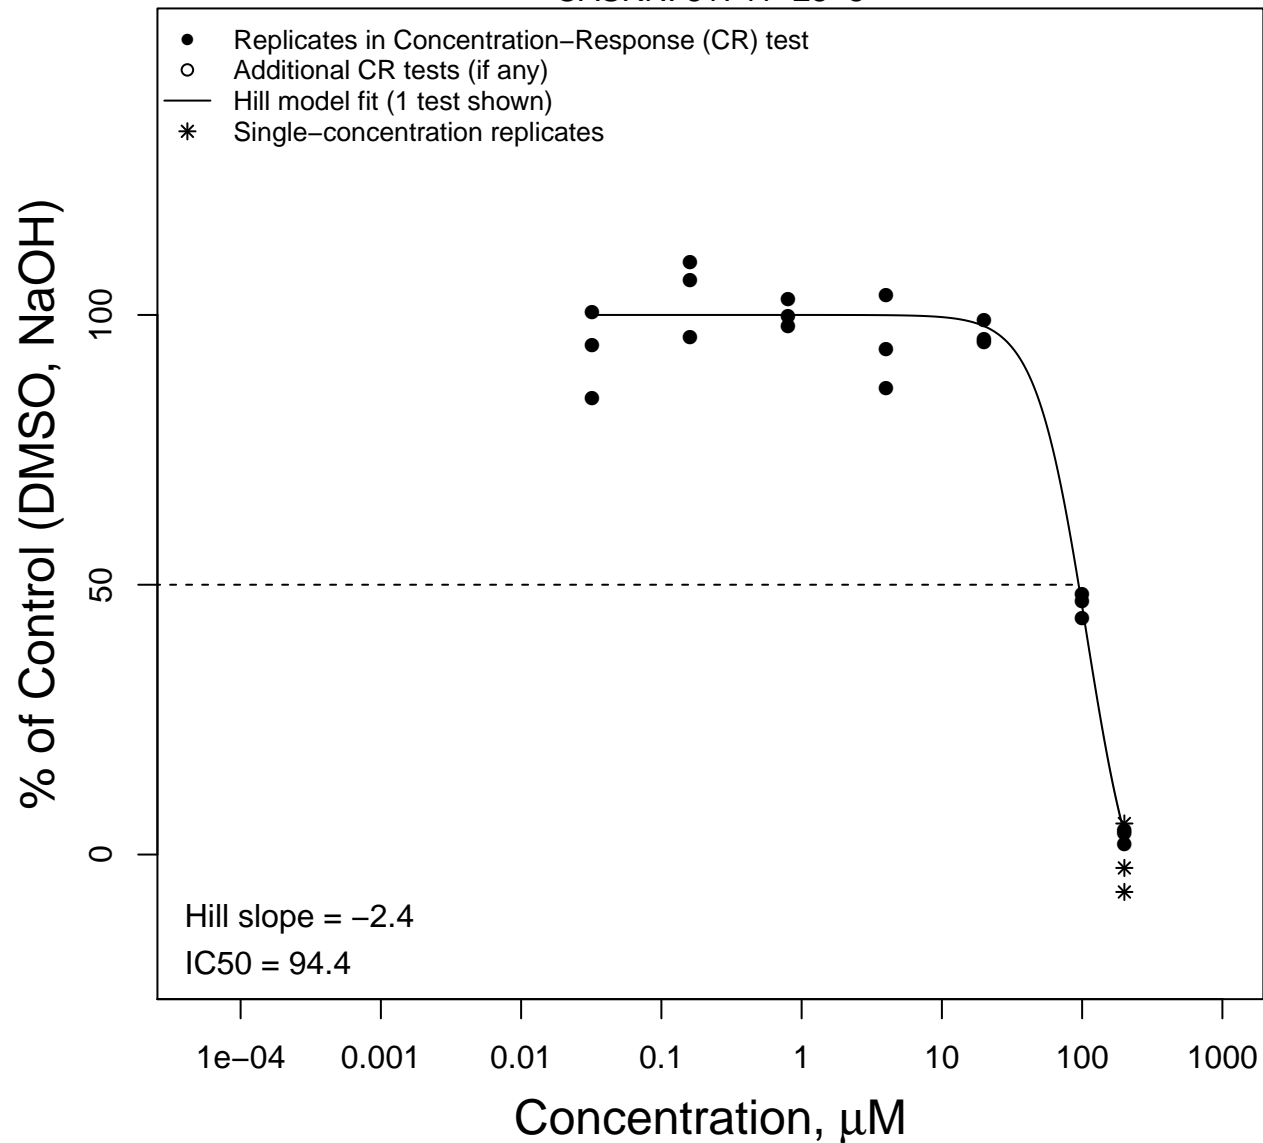

# Sodium 4-octylbenzenesulfonate

CASRN: 6149-03-7

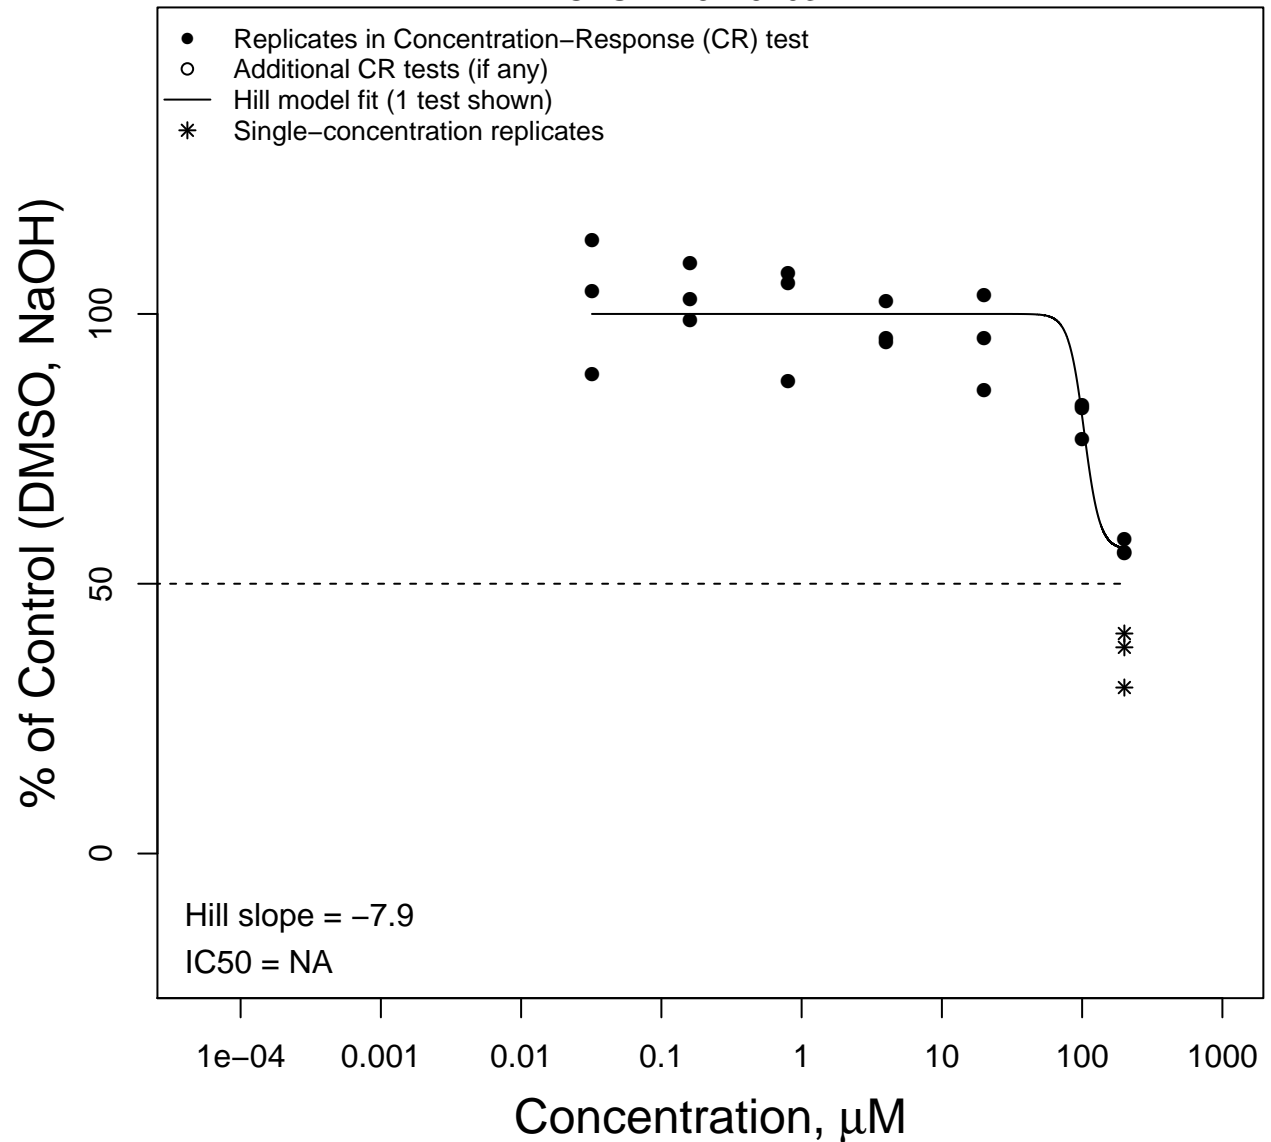



# 2-Ethylhexyl trans-4-methoxycinnamate

CASRN: 83834-59-7

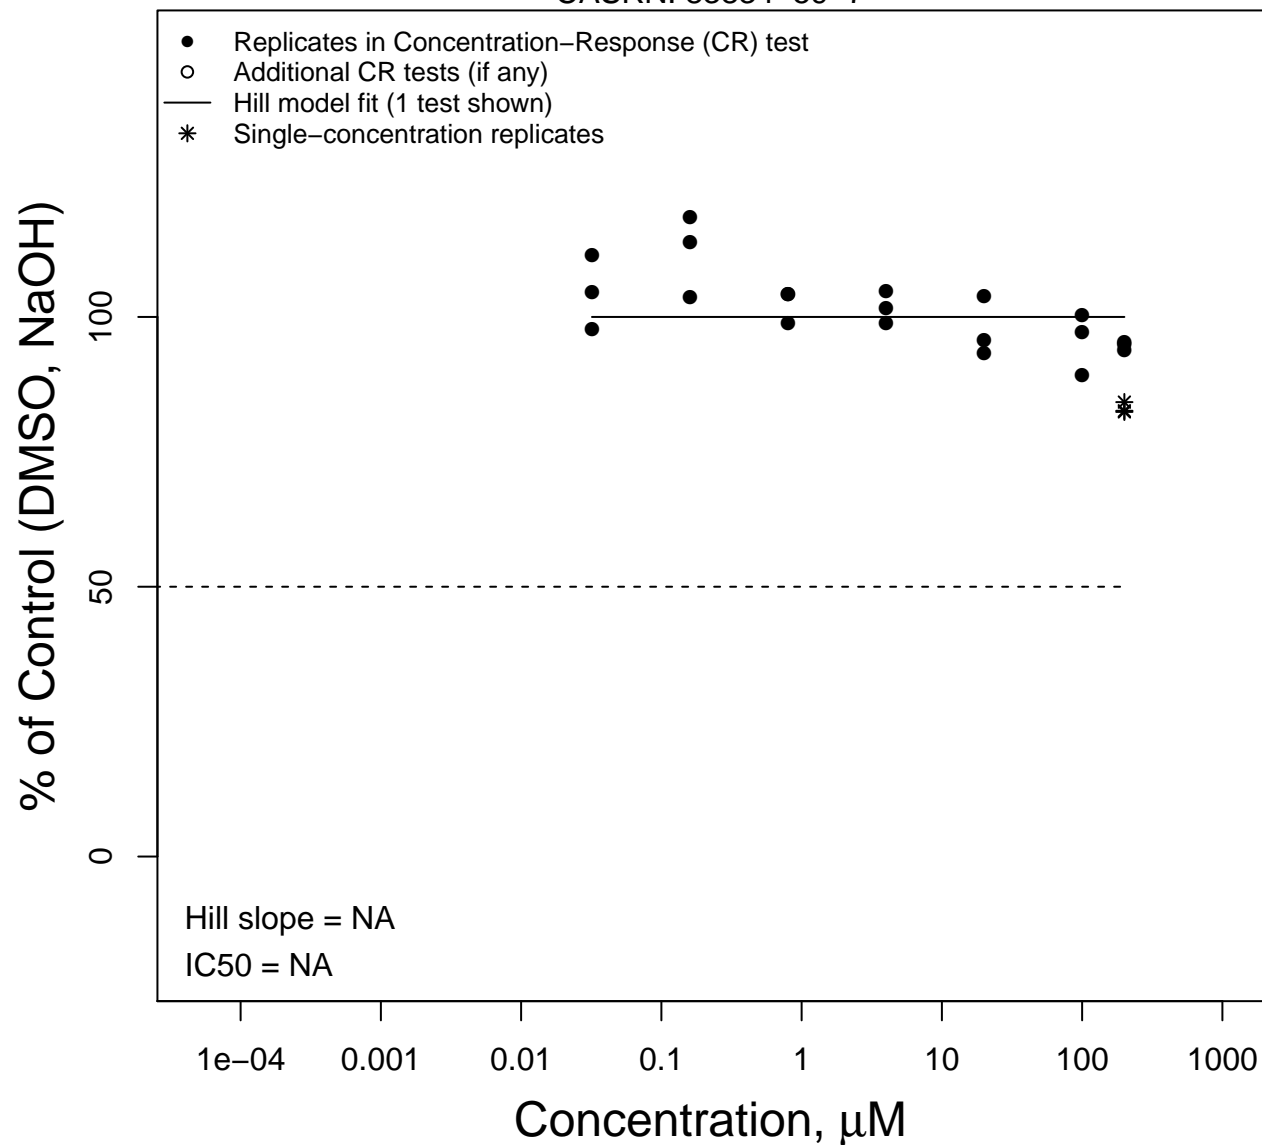

# Benzalkonium chloride

CASRN: 8001-54-5

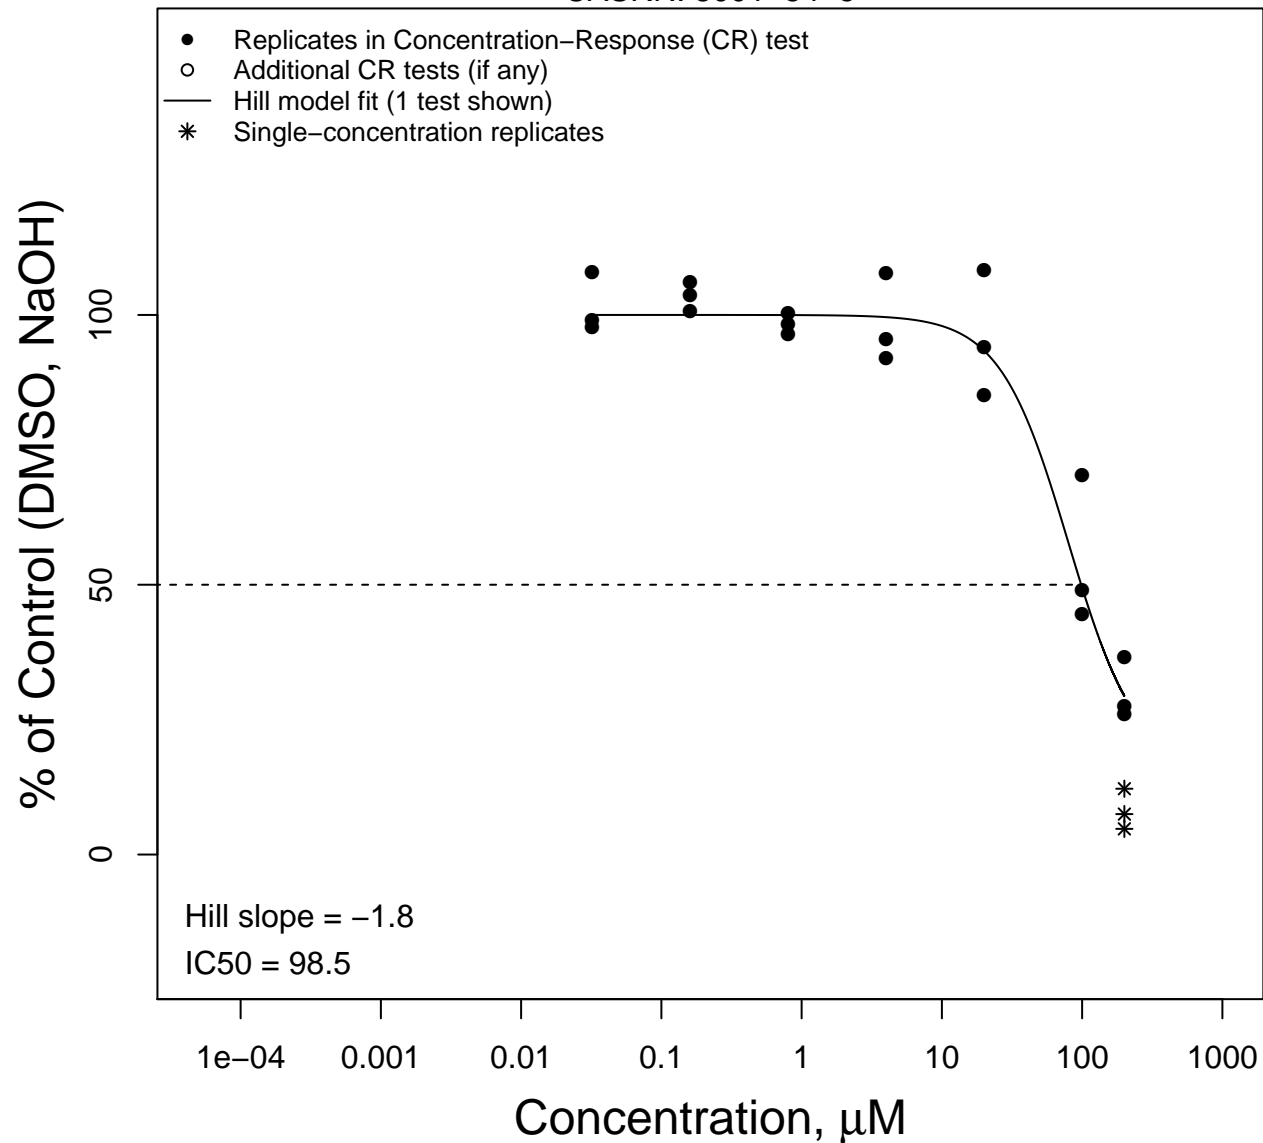

Supplement: NIHMS1682375-supplement-Supplement1.pdf [file NIHMS1682375-supplement-Supplement1.pdf]
